# Supplementary material for: A theoretical study on the mechanism of hydrogenation of carboxylic acids catalyzed by the Saito catalyst
Source: Royal Society of Chemistry journal article supplement (doi:10.1039/c7dt04447j), 2018-01-01
Supplement: c7dt04447j1.pdf [file c7dt04447j1.pdf]

## Theoretical study on the mechanism of hydrogenation of carboxylic acids catalyzed by the Saito catalyst

*Qianqian Lu,<sup>[a, b]</sup> Jinshuai Song,<sup>[a]</sup> Minyi Zhang,<sup>[a]</sup> Jing Wei,<sup>[a]</sup> and Chunsen Li\*<sup>[a, b]</sup>*

<sup>[a]</sup>State Key Laboratory of Structural Chemistry, Fujian Institute of Research on the Structure of Matter, Chinese Academy of Sciences, Fuzhou, Fujian 350002, China

<sup>[b]</sup>Fujian Provincial Key Laboratory of Theoretical and Computational Chemistry, Xiamen, Fujian 361005, China

### Table of Contents

|                                                                                                                                               |          |
|-----------------------------------------------------------------------------------------------------------------------------------------------|----------|
| Calculated results of the solution-phase optimizations.....                                                                                   | S2       |
| Ligand exchange between I and carboxylic acid .....                                                                                           | S2       |
| The detailed H <sub>2</sub> coordination process of II .....                                                                                  | S3       |
| H <sub>2</sub> heterolysis from Int4 .....                                                                                                    | S4       |
| Alternative H <sub>2</sub> heterolysis from Int6 .....                                                                                        | S4       |
| Direct proton transfer of Int4 .....                                                                                                          | S5       |
| The C-OH bond cleavage processes of Int4 and Int6.....                                                                                        | S5       |
| The isomerization of Int2 to Int2' .....                                                                                                      | S5       |
| The cationic hydrogenation mechanism.....                                                                                                     | S6       |
| The Bullock's ionic hydrogenation .....                                                                                                       | S7       |
| Noncovalent interaction analysis of transition states TS2 and TS2a.....                                                                       | S8       |
| Hydride migration transition states of HOAc .....                                                                                             | S8       |
| Thermal correction of Gibbs free energy (TCG, hartree) and total electronic energies (E, hartree) in toluene solvent .....                    | S9       |
| Thermal correction of Gibbs free energy (TCG, hartree) and total electronic energies (E, hartree) based on solution-phase optimizations ..... | S10      |
| Cartesian coordinates for all optimized geometries .....                                                                                      | S11-S103 |

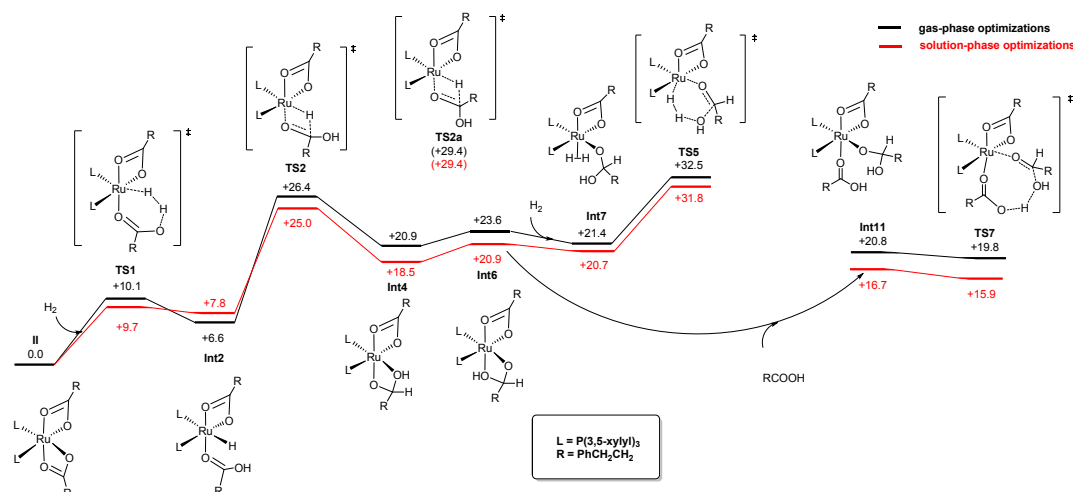

**Figure S1.** Computational results of gas-phase optimizations (M06/SDD-6-311+G(2d,p)(SMD)//B3LYP/Lan12DZ-6-31G(d) and solution-phase optimizations ( $\omega$ b97X-D/SDD-6-311+G(2d,p)(SMD)// $\omega$ b97X-D/Lan12DZ-6-31G(d)(SMD)

According to Figure S1, the energies of intermediates and transition states calculated by solution-phase optimizations are similar to those calculated by gas-phase optimizations. Besides, on the basis of solution-phase optimizations, the carboxylic acid-assisted protonation (TS7 = +15.9 kcal/mol) is more favorable than the H<sub>2</sub> heterolysis (TS5 = +31.8 kcal/mol), indicating the new mechanism assisted by carboxylic acid is preferred over the proposed mechanism. This is in accordance with the results of gas-phase optimizations.

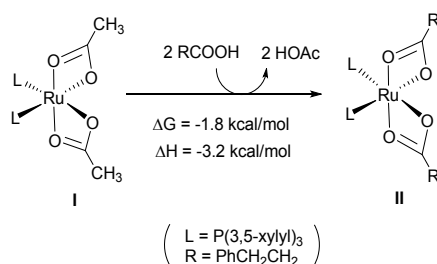

**Figure S2.** Ligand exchange between I and carboxylic acid.

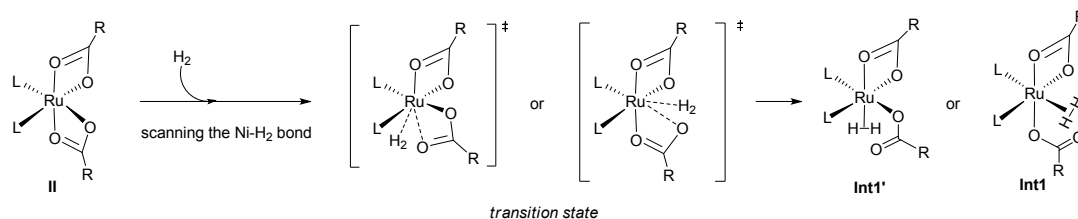

**Figure S3.** The proposed transition states for H<sub>2</sub> coordination

We failed in locating the intermediate resulting from the partial decooordination of the carboxylate ligand of **II**. This difficulty is attributed to the intrinsic preference of carboxylate ligand for the  $\kappa^2$ -coordinated mode. In this regard, the partial decooordination of carboxylate ligand and the coordination of H<sub>2</sub> molecule are expected to occur simultaneously (Figure S3).

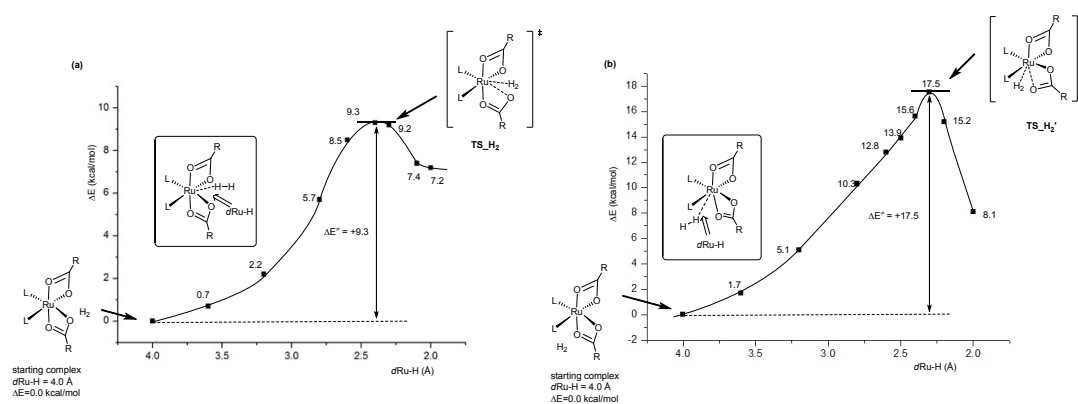

**Figure S4.** Estimated energy barriers for the H<sub>2</sub> coordination of **II**.

Note that the transition states connecting **II** and Int1/Int1' were failed to be located. In order to estimate the energy demand of this step, we performed partial optimizations by fixing the Ru-H<sub>2</sub> bond at different lengths (4.0–2.0 Å, Figure S4). The calculation results show that the partial dissociation of carboxylate ligand and the H<sub>2</sub> coordination need to overcome ~9.3 (**TS\_H2**) and ~17.5 kcal/mol (**TS\_H2'**) energy barrier for the generation of Int1 and Int1', respectively. The reason of the lower energy barrier of **TS\_H2** than **TS\_H2'** is the strong trans effect of the phosphine which leads to a facile dissociation of the Ru-O bond.

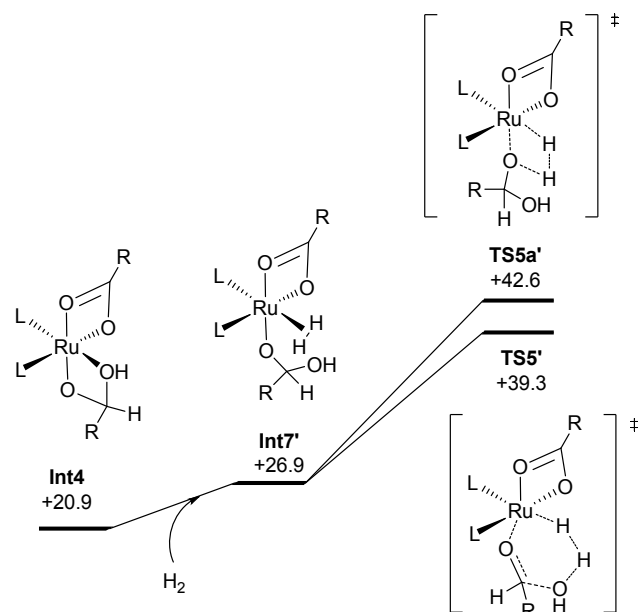

**Figure S5.** Energy profiles of H<sub>2</sub> heterolysis from **Int4**. Gibbs free energies (kcal/mol) are relative to **II**.

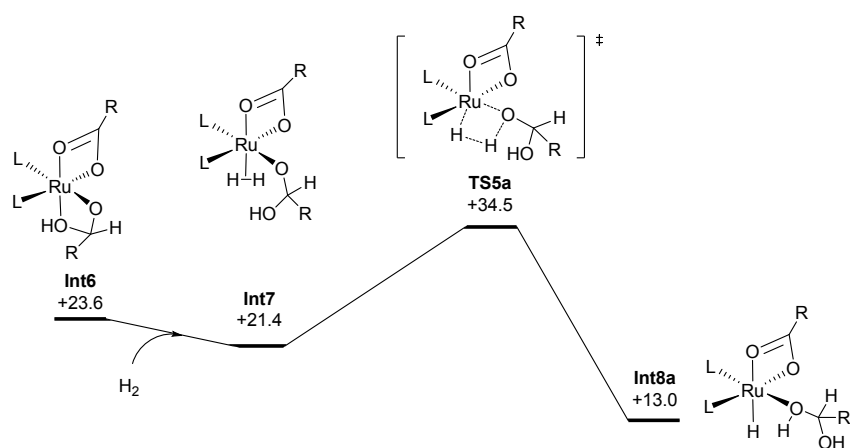

**Figure S6.** Energy profiles of the alternative H<sub>2</sub> heterolysis of **Int6**. Gibbs free energies (kcal/mol) are relative to **II**.

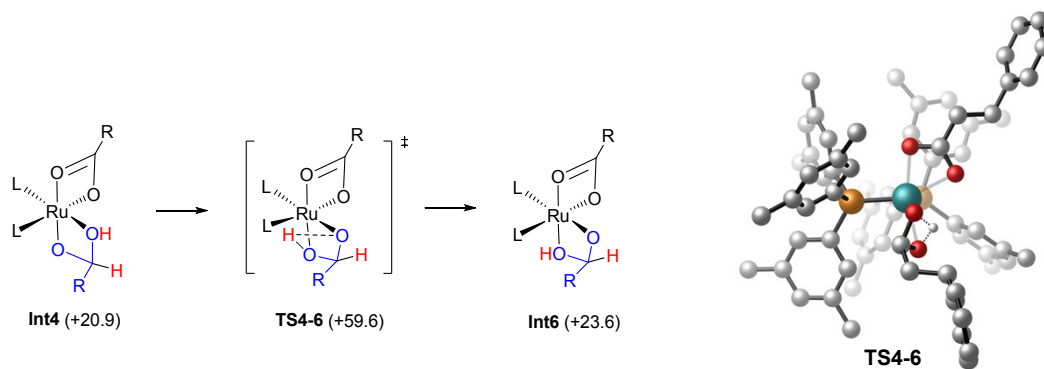

**Figure S7.** Direct proton transfer of **Int4**. Gibbs free energies (kcal/mol) are relative to **II**.

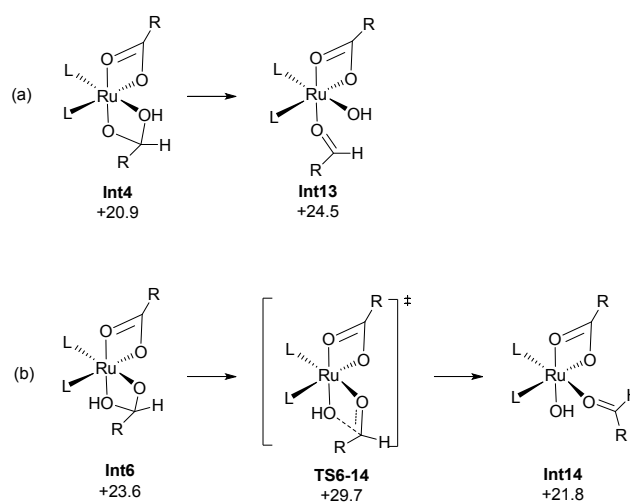

**Figure S8.** The C-OH bond cleavage of **Int4** and **Int6**. Gibbs free energies (kcal/mol) are relative to **II**.

Although the transition state of C-OH bond cleavage of **Int4** was not located, the results of constrained potential energy surface (PES) scan suggests that the C-OH bond cleavage of **Int4** needs to overcome the energy barrier of  $\sim 10$  kcal/mol. While the energy barrier for the C-OH bond cleavage of **Int6** is 6.1 kcal/mol.

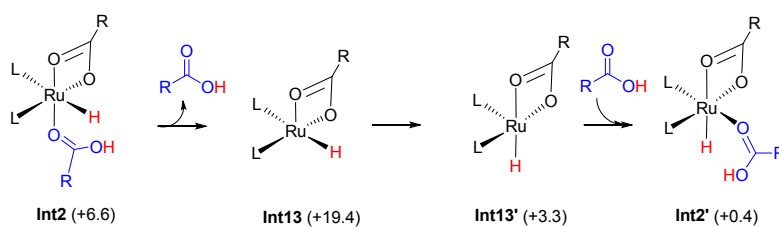

**Figure S9.** The isomerization of **Int2** to **Int2'**.

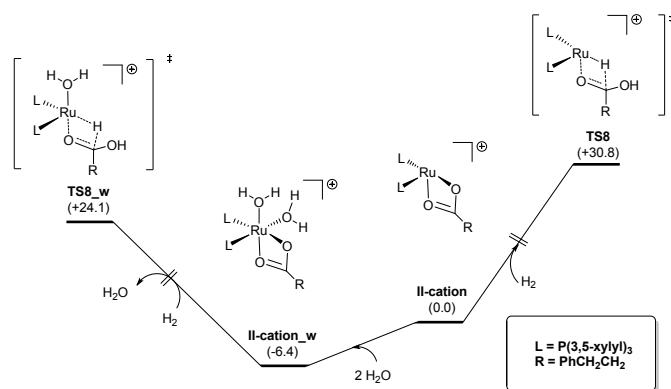

**Figure S10.** Energy profiles of hydride migration from the cationic Ru complex **II-cation**. Gibbs free energies are showed in kcal/mol.

Considering that several cationic ruthenium complexes were detected by experimental spectroscopy analysis, we also studied the cationic hydrogenation mechanism on the basis of the cationic catalyst  $(\text{P}(3,5\text{-xylyl})_3)_2\text{Ru}(\kappa^2\text{-OCOR})^+$  (**II-cation**). Note that due to the influence of solvation effect, it is inaccurate to compare the relative stability of species with different charges by relying on DFT calculations only.<sup>1</sup> Herein we focus on evaluating the reactivity of **II-cation**, as judged by the energy barrier of hydride migration and the second  $\text{H}_2$  heterolysis.

As shown in Figure S10, hydride migration via **TS8** from **II-cation** needs an energy barrier of 30.8 kcal/mol, which is 4.4 kcal/mol higher than that of the neutral mechanism. In an alternative pathway, we considered adding water molecule to stabilize **II-cation** and its hydride migration transition state. The calculated results show that the coordination of two water molecules indeed affords a thermodynamically stable intermediate **II-cation\_w**. However, hydride migration via **TS8\_w** still requires a high barrier of 30.5 kcal/mol. These results indicate that the neutral Ru-dicarboxylates complex **II** is more reactive than the cationic Ru-carboxylate **II-cation**. Therefore, the catalytic hydrogenation of carboxylic acids occurs via the neutral mechanism, and this is common for the detected metal species to lie off the catalytic cycle.<sup>2</sup>

*References:*

1. R. E. Plata and D. A. Singleton, *J. Am. Chem. Soc.* **2015**, *137*, 3811-3826.
2. J. Halpern, *Inorg. Chim. Acta* **1981**, *50*, 11-19.

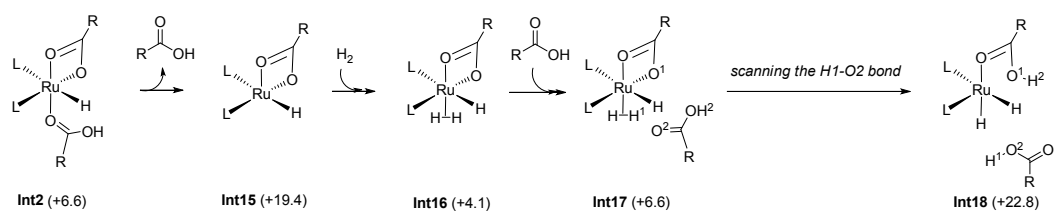

**Figure S11.** The ionic hydrogenation mechanism

As shown in Figure S11, carboxylic acid first dissociates from **Int2** to give the Ru-hydride intermediate **Int13**. Subsequent coordination of  $\text{H}_2$  and carboxylic acid result in the generation of **Int15**. From **Int15**, proton transfer from  $\text{H}_2$  to carboxylic acid will occur in the ionic hydrogenation mechanism. Unfortunately, the resultant ion pair involving the protonated carboxylic acid was not located after many trials, as the protonated carboxylic acid always returns back proton to the hydride during the geometry optimizations. Besides, the constrained potential energy surface (PES) scan along H1-O1 bond indicates that the H2 atom of carboxyl group would be transferred into the O2 atom of carboxylate ligand once H1 atom transfers to the O1 atom of carboxylic acid. These results suggest that the proton transfer from  $\text{H}_2$  to carboxylic acid is quite difficult for this carboxylic acid hydrogenation reaction.

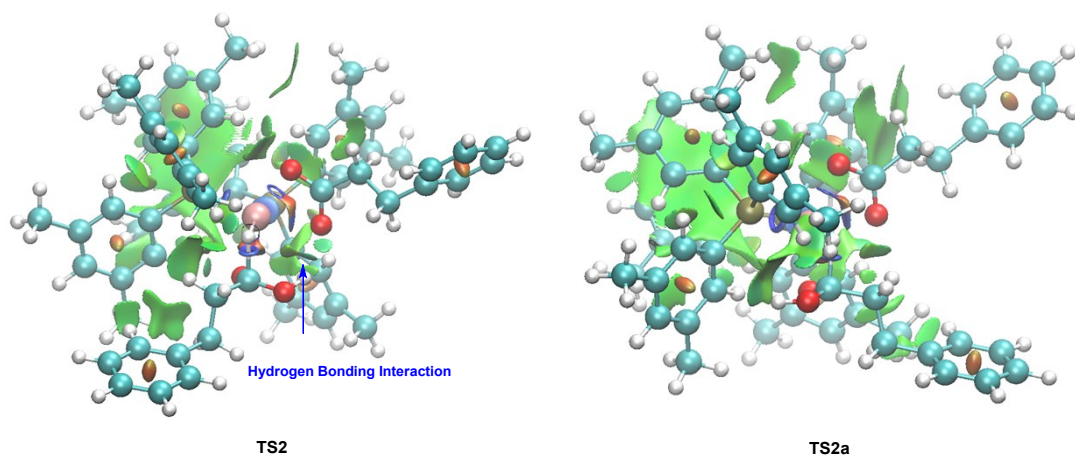

**Figure S12.** Noncovalent interaction analysis of transition states **TS2** and **TS2a**.

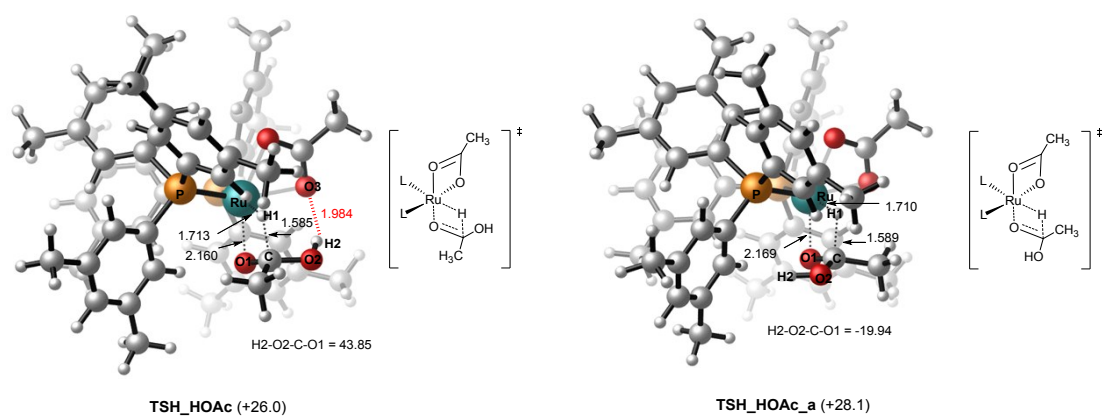

**Figure S13.** Two types of hydride migration transition states of HOAc. Bond distances and angles are given in [Å] and [°], respectively. Gibbs free energies are relative to  $(P(3,5\text{-xylyl})_3)_2\text{Ru}(\kappa^2\text{-OAc})_2$ .



**Table S1. Thermal correction of Gibbs free energy (TCG, hartree) and total electronic energies (E, hartree) in toluene solvent for all species involved in this study**

| Compounds             | TCG       | E              | Compounds                | TCG      | E              |
|-----------------------|-----------|----------------|--------------------------|----------|----------------|
| <b>H<sub>2</sub></b>  | -0.001342 | -1.17008472813 | <b>TS6</b>               | 1.089960 | -3561.62010420 |
| <b>H<sub>2</sub>O</b> | 0.003474  | -76.4222217383 | <b>Int9</b>              | 1.090896 | -3561.62038662 |
| <b>HOAc</b>           | 0.034689  | -229.036891346 | <b>Int10</b>             | 1.25605  | -4060.93672458 |
| <b>A</b>              | 0.134636  | -499.257035872 | <b>Int8'</b>             | 1.091574 | -3561.622739   |
| <b>B</b>              | 0.154426  | -425.209204062 | <b>TS6'</b>              | 1.092407 | -3561.613165   |
| <b>hemiacetal</b>     | 0.157943  | -500.437825916 | <b>Int9'</b>             | 1.096149 | -3561.631225   |
| <b>aldehyde</b>       | 0.130783  | -424.002387339 | <b>Int7'</b>             | 1.116224 | -3638.04433820 |
| <b>I</b>              | 0.874629  | -3095.25946371 | <b>TS5'</b>              | 1.112522 | -3638.02089745 |
| <b>II</b>             | 1.076539  | -3635.70467694 | <b>TS5a'</b>             | 1.116164 | -3638.01932706 |
| <b>Int1</b>           | 1.092587  | -3636.87804424 | <b>Int11</b>             | 1.260257 | -4136.14906057 |
| <b>TS1</b>            | 1.090075  | -3636.87355174 | <b>TS7</b>               | 1.257674 | -4136.14808832 |
| <b>Int2</b>           | 1.091875  | -3636.88086882 | <b>Int12</b>             | 1.257558 | -4136.16584416 |
| <b>TS2</b>            | 1.091526  | -3636.84900087 | <b>TS4-6</b>             | 1.095113 | -3636.79970729 |
| <b>TS2a</b>           | 1.097134  | -3636.84986442 | <b>Int13</b>             | 1.093733 | -3636.85432866 |
| <b>Int3</b>           | 1.097637  | -3636.85916327 | <b>TS6-14</b>            | 1.097183 | -3636.84941348 |
| <b>Int4</b>           | 1.101150  | -3636.86746631 | <b>Int14</b>             | 1.094008 | -3636.85879106 |
| <b>Int1'</b>          | 1.091319  | -3636.88594824 | <b>Int15</b>             | 0.929798 | -3137.57599354 |
| <b>TS1'</b>           | 1.089234  | -3636.88162537 | <b>Int16</b>             | 0.948118 | -3138.79021435 |
| <b>Int2'</b>          | 1.092530  | -3636.89145614 | <b>Int17</b>             | 1.103432 | -3638.06391308 |
| <b>TS2'</b>           | 1.098418  | -3636.85184994 | <b>Int18</b>             | 1.108566 | -3638.04323964 |
| <b>Int4-acid</b>      | 1.260260  | -4136.14905238 | <b>II-cation</b>         | 0.926191 | -3136.83374857 |
| <b>TS3</b>            | 1.258031  | -4136.14708883 | <b>II- cation_w</b>      | 0.978684 | -3289.73400066 |
| <b>Int5</b>           | 1.259493  | -4136.15060709 | <b>TS8</b>               | 0.94569  | -3137.97554747 |
| <b>TS4</b>            | 1.256630  | -4136.15005102 | <b>TS8_w</b>             | 0.973472 | -3214.43274285 |
| <b>Int5-acid</b>      | 1.257571  | -4136.15015585 | <b>TSH_HOAc</b>          | 0.892254 | -3096.4070008  |
| <b>Int6</b>           | 1.097964  | -3636.85998158 | <b>TSH_HOAc_a</b>        | 0.895336 | -3096.40676081 |
| <b>Int7</b>           | 1.113663  | -3638.05049621 | <b>III<sup>a</sup></b>   | 1.000565 | -3478.54939554 |
| <b>TS5</b>            | 1.110645  | -3638.02990747 | <b>TSIII<sup>a</sup></b> | 1.024022 | -3479.69240299 |
| <b>TS5a</b>           | 1.112927  | -3638.02892813 | <b>IV<sup>a</sup></b>    | 0.626175 | -2701.11738115 |
| <b>Int8</b>           | 1.086709  | -3561.62843207 | <b>TSIV<sup>a</sup></b>  | 0.645401 | -2702.25925507 |
| <b>In8a</b>           | 1.116572  | -3638.06683892 |                          |          |                |

<sup>a</sup> The intermediate and transition states are calculated at the M06/6-311+G(d,p)(SDD)// $\omega$ B97X-D/6-31G(d)(LANL2DZ) level of theory.

**Table S2.** Thermal correction of Gibbs free energy (TCG, hartree) and total electronic energies (E, hartree) for some important species based on the solution-phase optimizations.

| Compounds             | TCG       | E              | Compounds    | TCG      | E              |
|-----------------------|-----------|----------------|--------------|----------|----------------|
| <b>H<sub>2</sub></b>  | -0.001332 | -1.17561185507 | <b>TS2a</b>  | 1.130664 | -3638.20481683 |
| <b>H<sub>2</sub>O</b> | 0.003862  | -76.4366767971 | <b>Int4</b>  | 1.132192 | -3638.22371021 |
| <b>A</b>              | 0.136806  | -499.437981835 | <b>Int6</b>  | 1.128486 | -3638.216016   |
| <b>II</b>             | 1.108162  | -3637.05216729 | <b>Int7</b>  | 1.146604 | -3639.41143711 |
| <b>TS1</b>            | 1.125231  | -3638.23076183 | <b>TS5</b>   | 1.14388  | -3639.39105572 |
| <b>Int2</b>           | 1.129202  | -3638.23761659 | <b>Int11</b> | 1.296231 | -4137.69165371 |
| <b>TS2</b>            | 1.126966  | -3638.20801768 | <b>TS7</b>   | 1.293182 | -4137.69001855 |

**Cartesian coordinates for all optimized geometries**

**H<sub>2</sub>**

|   |            |            |             |
|---|------------|------------|-------------|
| H | 0.00000000 | 0.00000000 | 0.37139400  |
| H | 0.00000000 | 0.00000000 | -0.37139400 |

**H<sub>2</sub>O**

|   |            |             |             |
|---|------------|-------------|-------------|
| O | 0.00000000 | 0.00000000  | 0.11942600  |
| H | 0.00000000 | 0.76261700  | -0.47770500 |
| H | 0.00000000 | -0.76261700 | -0.47770500 |

**HOAc**

|   |             |             |             |
|---|-------------|-------------|-------------|
| C | 0.09248600  | 0.12560900  | -0.00001900 |
| O | 0.77865800  | -1.04664100 | -0.00000200 |
| O | 0.64573600  | 1.20198000  | 0.00000300  |
| C | -1.39759100 | -0.10980200 | -0.00000400 |
| H | -1.68535400 | -0.69175800 | -0.88187400 |
| H | -1.68536200 | -0.69128500 | 0.88218900  |
| H | -1.91751800 | 0.84841300  | -0.00022900 |
| H | 1.72371000  | -0.80292600 | 0.00004300  |

**A (phenylpropionic acid)**

|   |             |             |             |
|---|-------------|-------------|-------------|
| C | 2.94075900  | 0.00001800  | -0.07328600 |
| C | 1.47293000  | 0.00049300  | -0.44262400 |
| C | 0.55014700  | -0.00093900 | 0.78671100  |
| C | -0.91404600 | -0.00048000 | 0.40039400  |
| C | -1.60451400 | 1.20324800  | 0.20238500  |
| C | -2.94456700 | 1.20668900  | -0.18804400 |
| C | -3.61934300 | 0.00051800  | -0.38701500 |
| C | -2.94487300 | -1.20614300 | -0.19003100 |
| C | -1.60481200 | -1.20369800 | 0.20040600  |
| H | 1.28053300  | 0.87414700  | -1.07846600 |
| H | 1.28049000  | -0.87165400 | -1.08052100 |
| H | 0.78229400  | -0.87762700 | 1.40132400  |
| H | -1.08781900 | 2.14753800  | 0.36247200  |
| H | -3.46270600 | 2.15138400  | -0.33174400 |
| H | -4.66359600 | 0.00088900  | -0.68779800 |
| H | -3.46325400 | -2.15046600 | -0.33529200 |
| H | -1.08837200 | -2.14839000 | 0.35892900  |
| O | 3.73058600  | 0.00163400  | -1.17709200 |
| O | 3.39442100  | -0.00158000 | 1.05004200  |
| H | 0.78229800  | 0.87433200  | 1.40333900  |
| H | 4.64999200  | 0.00118500  | -0.84922300 |

**aldehyde**

|   |             |             |             |
|---|-------------|-------------|-------------|
| H | -3.94470600 | 0.00511900  | 1.47042500  |
| C | -3.34350100 | 0.00179800  | 0.53204300  |
| C | -1.84631200 | 0.00274800  | 0.74062000  |
| C | -1.03435600 | -0.00247600 | -0.56387200 |
| C | 0.45898200  | -0.00130100 | -0.31596000 |
| C | 1.16635000  | -1.20406000 | -0.18173100 |
| C | 2.53772400  | -1.20577500 | 0.07857500  |
| C | 3.22765400  | 0.00114700  | 0.20911900  |
| C | 2.53612700  | 1.20689100  | 0.07563800  |
| C | 1.16480600  | 1.20274900  | -0.18464100 |
| H | -1.59566400 | 0.87697200  | 1.36155700  |
| H | -1.59546100 | -0.86635200 | 1.36862700  |
| H | -1.32217600 | -0.88052300 | -1.15291500 |
| H | 0.63760100  | -2.14905900 | -0.28995500 |
| H | 3.06800600  | -2.14989600 | 0.17360400  |
| H | 4.29603900  | 0.00210000  | 0.40774900  |
| H | 3.06522100  | 2.15190900  | 0.16834100  |
| H | 0.63481200  | 2.14678500  | -0.29520800 |
| O | -3.89076700 | -0.00224900 | -0.54884500 |
| H | -1.32237600 | 0.87060300  | -1.16021300 |

**hemiacetal**

|   |             |             |             |
|---|-------------|-------------|-------------|
| H | -3.94470600 | 0.00511900  | 1.47042500  |
| C | -3.34350100 | 0.00179800  | 0.53204300  |
| C | -1.84631200 | 0.00274800  | 0.74062000  |
| C | -1.03435600 | -0.00247600 | -0.56387200 |
| C | 0.45898200  | -0.00130100 | -0.31596000 |
| C | 1.16635000  | -1.20406000 | -0.18173100 |
| C | 2.53772400  | -1.20577500 | 0.07857500  |
| C | 3.22765400  | 0.00114700  | 0.20911900  |
| C | 2.53612700  | 1.20689100  | 0.07563800  |
| C | 1.16480600  | 1.20274900  | -0.18464100 |
| H | -1.59566400 | 0.87697200  | 1.36155700  |
| H | -1.59546100 | -0.86635200 | 1.36862700  |
| H | -1.32217600 | -0.88052300 | -1.15291500 |
| H | 0.63760100  | -2.14905900 | -0.28995500 |
| H | 3.06800600  | -2.14989600 | 0.17360400  |
| H | 4.29603900  | 0.00210000  | 0.40774900  |
| H | 3.06522100  | 2.15190900  | 0.16834100  |
| H | 0.63481200  | 2.14678500  | -0.29520800 |
| O | -3.89076700 | -0.00224900 | -0.54884500 |
| H | -1.32237600 | 0.87060300  | -1.16021300 |

|                           |             |             |             |   |             |             |             |
|---------------------------|-------------|-------------|-------------|---|-------------|-------------|-------------|
| <b>B (phenylpropanol)</b> |             |             |             | H | -2.38702600 | 0.73521100  | 2.75542300  |
| H                         | 3.79185600  | -0.58311500 | 1.34385500  | C | -1.80895700 | -0.96338300 | 3.93869800  |
| C                         | 3.25246900  | -0.44211300 | 0.39290500  | C | -1.28196300 | -2.25786800 | 3.89905900  |
| C                         | 1.75652900  | -0.33843100 | 0.66594700  | H | -1.17407500 | -2.81589800 | 4.82796900  |
| C                         | 0.91255800  | -0.23728300 | -0.62059900 | C | -0.89671000 | -2.85912000 | 2.69362500  |
| C                         | -0.56731800 | -0.08709300 | -0.34045300 | C | -1.05926600 | -2.13757300 | 1.50694700  |
| C                         | -1.12966200 | 1.17854700  | -0.12027800 | H | -0.79086400 | -2.59842200 | 0.56017000  |
| C                         | -2.48647300 | 1.32124500  | 0.17361400  | C | -2.19026500 | -0.31686000 | 5.25028600  |
| C                         | -3.30939700 | 0.19546300  | 0.25130600  | H | -1.42189000 | 0.39959700  | 5.56885500  |
| C                         | -2.76405400 | -1.07094500 | 0.03220700  | H | -2.30272500 | -1.05947700 | 6.04725400  |
| C                         | -1.40578900 | -1.20749300 | -0.26045300 | H | -3.13278200 | 0.23634000  | 5.16692600  |
| H                         | 1.44374600  | -1.21469600 | 1.24921100  | C | -0.30829900 | -4.25155400 | 2.67094500  |
| H                         | 1.57442500  | 0.54260600  | 1.29414100  | H | -0.43483600 | -4.75672900 | 3.63424500  |
| H                         | 1.27559800  | 0.61548200  | -1.20411500 | H | 0.76625200  | -4.21926500 | 2.44930600  |
| H                         | -0.49570700 | 2.06054500  | -0.18494300 | H | -0.77736500 | -4.87289600 | 1.89909500  |
| H                         | -2.90233200 | 2.31232900  | 0.33711400  | C | -2.79119000 | 1.52868700  | 0.29208600  |
| H                         | -4.36704900 | 0.30478400  | 0.47630200  | C | -4.13270700 | 1.45642200  | 0.70381600  |
| H                         | -3.39682500 | -1.95346100 | 0.08446100  | H | -4.62591400 | 0.49129400  | 0.77094800  |
| H                         | -0.98962800 | -2.19772400 | -0.43575000 | C | -4.85650900 | 2.60999500  | 1.01723100  |
| H                         | 1.08535500  | -1.13499500 | -1.22985400 | C | -4.21611500 | 3.85261000  | 0.90939500  |
| H                         | 3.45609100  | -1.32527100 | -0.23641000 | H | -4.77416000 | 4.75831000  | 1.14378800  |
| O                         | 3.67035100  | 0.75466600  | -0.25724200 | C | -2.88631000 | 3.95948700  | 0.49464100  |
| H                         | 4.60848000  | 0.66481000  | -0.48125300 | C | -2.18179600 | 2.78469000  | 0.18708000  |
| <b>I</b>                  |             |             |             | H | -1.16403500 | 2.85350200  | -0.17954700 |
| C                         | -3.14282600 | -1.08041700 | -0.88824900 | C | -6.30709300 | 2.52804600  | 1.43696200  |
| C                         | -3.42360800 | -0.94237700 | -2.25438700 | H | -6.97143500 | 2.90347900  | 0.64766400  |
| H                         | -2.85084400 | -0.24350600 | -2.85332700 | H | -6.50073400 | 3.12974000  | 2.33312100  |
| C                         | -4.43481200 | -1.69702500 | -2.86302700 | H | -6.60288500 | 1.49652400  | 1.65257700  |
| C                         | -5.17041700 | -2.59361300 | -2.08213200 | C | -2.21099700 | 5.30897700  | 0.38637100  |
| H                         | -5.96246400 | -3.17949900 | -2.54679300 | H | -1.72576900 | 5.59114900  | 1.33053700  |
| C                         | -4.91308600 | -2.75515900 | -0.71621300 | H | -2.92988100 | 6.09903900  | 0.14327300  |
| C                         | -3.89759400 | -1.99053500 | -0.13025700 | C | 3.06730400  | 1.27687400  | -0.64224600 |
| H                         | -3.70053000 | -2.11315400 | 0.92951500  | C | 3.36052100  | 1.35197900  | -2.01028600 |
| C                         | -4.70183100 | -1.55843600 | -4.34503300 | H | 2.83837200  | 0.70674800  | -2.70823700 |
| H                         | -5.73793300 | -1.81409800 | -4.59319700 | C | 4.32487400  | 2.24692500  | -2.49288100 |
| H                         | -4.05174700 | -2.22522900 | -4.92735000 | C | 4.99885000  | 3.06683200  | -1.58340200 |
| H                         | -4.50801100 | -0.53794200 | -4.69156500 | H | 5.75335400  | 3.76137700  | -1.95054900 |
| C                         | -5.70072100 | -3.75159000 | 0.10516700  | C | 4.72898700  | 3.01411500  | -0.21071300 |
| H                         | -5.64711200 | -3.52145400 | 1.17447500  | C | 3.76253500  | 2.11192500  | 0.24761000  |
| H                         | -5.31568400 | -4.77159100 | -0.02869200 | H | 3.55846100  | 2.06453400  | 1.31201900  |
| H                         | -6.75746900 | -3.76618000 | -0.18562300 | C | 4.60683400  | 2.33330400  | -3.97599100 |
| C                         | -1.59689800 | -0.84124100 | 1.51443600  | H | 5.57771300  | 2.80008500  | -4.17436800 |
| C                         | -1.96532500 | -0.26447600 | 2.73357600  | H | 3.84234200  | 2.93171800  | -4.48911600 |
|                           |             |             |             | H | 4.60251800  | 1.34189500  | -4.44195000 |

|    |             |             |             |           |             |             |             |
|----|-------------|-------------|-------------|-----------|-------------|-------------|-------------|
| C  | 5.45481400  | 3.92569500  | 0.75365300  | H         | 0.77610200  | -3.93709200 | -3.58396400 |
| H  | 6.52312500  | 3.99330000  | 0.51675300  | H         | 0.57226500  | -2.81120300 | -4.94782100 |
| H  | 5.35948500  | 3.57364500  | 1.78613000  | O         | 1.32406200  | -0.70521000 | -3.23265300 |
| H  | 5.05226000  | 4.94696900  | 0.71732500  | O         | 0.00342200  | -2.02598000 | -2.07530700 |
| C  | 2.86446800  | -1.50082300 | 0.10482000  | C         | -0.71341400 | 2.10482300  | -2.93462900 |
| C  | 4.22618000  | -1.40829700 | 0.43591900  | C         | -1.04830800 | 3.33967100  | -3.73400400 |
| H  | 4.68131200  | -0.43327400 | 0.58057500  | H         | -0.24366300 | 4.07496400  | -3.65709000 |
| C  | 5.01772600  | -2.55233800 | 0.57384300  | H         | -1.22631300 | 3.07711400  | -4.77971100 |
| C  | 4.42404400  | -3.80531300 | 0.37150400  | O         | -1.20627400 | 0.97652800  | -3.23855800 |
| H  | 5.03397700  | -4.70268200 | 0.46760700  | O         | 0.05475100  | 2.19480500  | -1.91613800 |
| C  | 3.07300900  | -3.93176600 | 0.03685500  | H         | 2.17414700  | -3.01464100 | -4.22632100 |
| C  | 2.30043000  | -2.76745700 | -0.09262700 | H         | -1.96602600 | 3.78758900  | -3.33314400 |
| H  | 1.26133600  | -2.84849600 | -0.38880400 |           |             |             |             |
| C  | 6.49010400  | -2.44163100 | 0.90069400  | <b>II</b> |             |             |             |
| H  | 7.10825400  | -2.58348100 | 0.00421400  | C         | 1.61970500  | -0.23316200 | 2.93295800  |
| H  | 6.79844800  | -3.20139000 | 1.62831500  | C         | 1.37187200  | 1.10482500  | 3.25403900  |
| H  | 6.73491400  | -1.45784800 | 1.31375500  | H         | 1.05498500  | 1.79223200  | 2.48041500  |
| C  | 2.45182700  | -5.29477300 | -0.17546900 | C         | 1.54090000  | 1.57605300  | 4.56570400  |
| H  | 2.05248900  | -5.70512100 | 0.76180700  | C         | 1.97251100  | 0.68509600  | 5.54918400  |
| H  | 3.18517100  | -6.01359000 | -0.55707300 | H         | 2.10951400  | 1.04389800  | 6.56848900  |
| H  | 1.62049800  | -5.24649400 | -0.88660500 | C         | 2.23517300  | -0.66198500 | 5.25811500  |
| C  | 1.55403000  | 0.54863200  | 1.69454300  | C         | 2.05241700  | -1.10778900 | 3.94771200  |
| C  | 1.93323800  | -0.24154600 | 2.78476200  | H         | 2.25141700  | -2.14982400 | 3.71656800  |
| H  | 2.38289100  | -1.21505300 | 2.61774000  | C         | 1.24055000  | 3.02071100  | 4.89504300  |
| C  | 1.75197300  | 0.20750500  | 4.09968200  | H         | 1.62511100  | 3.29575600  | 5.88278600  |
| C  | 1.19145200  | 1.47233000  | 4.30470800  | H         | 0.15904200  | 3.20915800  | 4.89496600  |
| H  | 1.06283200  | 1.83722500  | 5.32262200  | H         | 1.68360600  | 3.69802800  | 4.15602400  |
| C  | 0.79533300  | 2.28385200  | 3.23398300  | C         | 2.69862100  | -1.60582800 | 6.34524200  |
| C  | 0.97822500  | 1.80565800  | 1.93235900  | H         | 2.93566900  | -2.59500200 | 5.94078000  |
| H  | 0.69207400  | 2.43205500  | 1.09216200  | H         | 1.92828100  | -1.73835800 | 7.11597700  |
| C  | 0.19164500  | 3.65006600  | 3.47008500  | H         | 3.59508000  | -1.22622000 | 6.85118000  |
| H  | 0.83193700  | 4.44553700  | 3.06785900  | C         | 0.95155700  | -2.59539600 | 1.49999100  |
| H  | 0.04965000  | 3.84583700  | 4.53795000  | C         | 1.70246000  | -3.67917800 | 1.03911900  |
| H  | -0.78357800 | 3.74046400  | 2.97671500  | H         | 2.59226500  | -3.50673600 | 0.44166500  |
| C  | 2.14049200  | -0.67162800 | 5.26608500  | C         | 1.34169500  | -4.99708600 | 1.35915200  |
| H  | 3.10105000  | -1.16971400 | 5.09135100  | C         | 0.21806800  | -5.20799800 | 2.16152000  |
| H  | 1.39276700  | -1.45936100 | 5.42730000  | H         | -0.05389200 | -6.22579400 | 2.43771200  |
| H  | 2.22137500  | -0.09602900 | 6.19430200  | C         | -0.56005100 | -4.14085800 | 2.63340200  |
| Ru | 0.01800700  | 0.06917000  | -1.55764200 | C         | -0.18194900 | -2.84028900 | 2.29300100  |
| P  | -1.82553400 | -0.00452900 | -0.12129100 | H         | -0.75214000 | -2.00245700 | 2.68648900  |
| P  | 1.81421300  | 0.02467800  | -0.06310500 | C         | 2.15558900  | -6.15837800 | 0.83683200  |
| H  | -1.43461100 | 5.30386600  | -0.38581200 | H         | 1.90152400  | -6.37248400 | -0.20966100 |
| C  | 0.80642300  | -1.84975400 | -3.05531800 | H         | 1.97184300  | -7.07057700 | 1.41433500  |
| C  | 1.10344500  | -2.98381000 | -4.00449200 | H         | 3.22996000  | -5.94501200 | 0.87283000  |

|   |             |             |             |    |             |             |             |
|---|-------------|-------------|-------------|----|-------------|-------------|-------------|
| C | -1.78238800 | -4.39662700 | 3.48586000  | C  | -3.37293700 | -1.21291200 | 0.79323600  |
| H | -1.64108700 | -5.26438000 | 4.13990700  | H  | -2.52074100 | -1.35294700 | 1.44879200  |
| H | -2.66517300 | -4.60031700 | 2.86435500  | C  | -6.76943500 | -0.49453000 | -1.76983400 |
| H | -2.01942300 | -3.53288400 | 4.11564800  | H  | -7.21132100 | 0.48777900  | -1.55740600 |
| C | 3.16192900  | -0.93323800 | 0.56274200  | H  | -7.55850400 | -1.24135000 | -1.62157600 |
| C | 4.27489200  | -0.70634000 | 1.38816100  | H  | -6.48831400 | -0.50575700 | -2.82760400 |
| H | 4.13146600  | -0.47450600 | 2.43806500  | C  | -4.87102300 | -1.61053600 | 2.79107100  |
| C | 5.57686600  | -0.76549300 | 0.87981800  | H  | -4.63197600 | -2.65951000 | 3.00970300  |
| C | 5.75415200  | -1.06474100 | -0.47813500 | H  | -5.90784900 | -1.43847500 | 3.09809000  |
| H | 6.76382900  | -1.11787500 | -0.88311700 | H  | -4.22344800 | -0.99413800 | 3.42542600  |
| C | 4.66701700  | -1.29117400 | -1.32716000 | C  | -0.95162400 | -2.59520500 | -1.50023400 |
| C | 3.37300000  | -1.21305300 | -0.79328500 | C  | -1.70261600 | -3.67899000 | -1.03946800 |
| H | 2.52080900  | -1.35296500 | -1.44887800 | H  | -2.59238300 | -3.50654200 | -0.44196500 |
| C | 6.76951400  | -0.49501100 | 1.76984600  | C  | -1.34198300 | -4.99687300 | -1.35968200 |
| H | 7.20957000  | 0.48857200  | 1.55948900  | C  | -0.21839700 | -5.20778000 | -2.16213700 |
| H | 7.55976900  | -1.24012700 | 1.61946400  | H  | 0.05345800  | -6.22556100 | -2.43848000 |
| H | 6.48895800  | -0.50911200 | 2.82774000  | C  | 0.55979500  | -4.14066100 | -2.63389600 |
| C | 4.87104600  | -1.61055500 | -2.79116700 | C  | 0.18181500  | -2.84008800 | -2.29331100 |
| H | 4.63158700  | -2.65939400 | -3.00998900 | H  | 0.75206100  | -2.00225300 | -2.68671600 |
| H | 5.90795600  | -1.43885700 | -3.09810400 | C  | 1.78212900  | -4.39637100 | -3.48637600 |
| C | -1.61958600 | -0.23277100 | -2.93290300 | H  | 2.01773300  | -3.53350000 | -4.11790400 |
| C | -1.37159500 | 1.10522800  | -3.25384900 | H  | 1.64175700  | -5.26556200 | -4.13869800 |
| H | -1.05454700 | 1.79249700  | -2.48016900 | H  | 2.66545800  | -4.59762100 | -2.86484400 |
| C | -1.54084800 | 1.57666800  | -4.56539700 | C  | -2.15591400 | -6.15818500 | -0.83746400 |
| C | -1.97281500 | 0.68590600  | -5.54891000 | H  | -3.23023200 | -5.94442400 | -0.87257800 |
| H | -2.11016900 | 1.04490500  | -6.56809600 | H  | -1.90117800 | -6.37299000 | 0.20872500  |
| C | -2.23550600 | -0.66119500 | -5.25800600 | H  | -1.97288700 | -7.07011800 | -1.41561900 |
| C | -2.05262100 | -1.10719900 | -3.94767800 | Ru | 0.00010800  | 0.60372400  | 0.00005900  |
| H | -2.25184700 | -2.14920800 | -3.71660000 | P  | 1.41405000  | -0.82815900 | 1.18273000  |
| C | -1.24061200 | 3.02139500  | -4.89453900 | P  | -1.41397000 | -0.82797400 | -1.18275000 |
| H | -1.62449600 | 3.29631600  | -5.88257800 | H  | 4.22374800  | -0.99379400 | -3.42545300 |
| H | -0.15915700 | 3.21011800  | -4.89362800 | C  | -1.96850000 | 1.99866700  | 0.84117100  |
| H | -1.68441100 | 3.69862300  | -4.15587800 | C  | -3.08039700 | 2.84027300  | 1.42890100  |
| C | -2.69843800 | -1.60503100 | -6.34535800 | C  | -4.15157400 | 3.22528800  | 0.38647600  |
| H | -3.58791800 | -1.21993700 | -6.85930500 | C  | -5.28395500 | 4.02548200  | 0.99300700  |
| H | -2.94633800 | -2.59093500 | -5.93940800 | C  | -6.40220300 | 3.38078800  | 1.54085800  |
| H | -1.92336400 | -1.74647800 | -7.10979300 | C  | -7.43600700 | 4.11087700  | 2.12931100  |
| C | -3.16185500 | -0.93296700 | -0.56277100 | C  | -7.36887600 | 5.50488500  | 2.18015200  |
| C | -4.27480200 | -0.70590700 | -1.38815200 | C  | -6.26174800 | 6.16028700  | 1.63739400  |
| H | -4.13139800 | -0.47395300 | -2.43803200 | C  | -5.23078400 | 5.42510200  | 1.04967900  |
| C | -5.57678600 | -0.76503400 | -0.87981500 | H  | -3.52384300 | 2.28958800  | 2.26408800  |
| C | -5.75408300 | -1.06440000 | 0.47810700  | H  | -2.63226900 | 3.75135000  | 1.84936400  |
| H | -6.76374700 | -1.11749900 | 0.88312300  | H  | -3.66808800 | 3.79152500  | -0.41610200 |
| C | -4.66694800 | -1.29100100 | 1.32710300  | H  | -6.46087700 | 2.29477100  | 1.49960900  |

|   |             |            |             |
|---|-------------|------------|-------------|
| H | -8.29627600 | 3.59159500 | 2.54455900  |
| H | -8.17422600 | 6.07564800 | 2.63505500  |
| H | -6.20244100 | 7.24544300 | 1.66686000  |
| H | -4.37398300 | 5.94302000 | 0.62329900  |
| O | -1.51810600 | 2.23017000 | -0.32525600 |
| O | -1.46608800 | 1.04117900 | 1.52103700  |
| H | -4.54508000 | 2.30862900 | -0.06840400 |
| C | 1.96868100  | 1.99868700 | -0.84101800 |
| C | 3.08057300  | 2.84031100 | -1.42872400 |
| C | 4.15161200  | 3.22553900 | -0.38624400 |
| C | 5.28396800  | 4.02578000 | -0.99276300 |
| C | 6.40234300  | 3.38114200 | -1.54041900 |
| C | 7.43611800  | 4.11127300 | -2.12887000 |
| C | 7.36882900  | 5.50526700 | -2.17990400 |
| C | 6.26157500  | 6.16061400 | -1.63733800 |
| C | 5.23064000  | 5.42538600 | -1.04962300 |
| H | 3.52414700  | 2.28956100 | -2.26380200 |
| H | 2.63241100  | 3.75129400 | -1.84935400 |
| H | 3.66800200  | 3.79181400 | 0.41623200  |
| H | 6.46114200  | 2.29513900 | -1.49901500 |
| H | 8.29648800  | 3.59203800 | -2.54396600 |
| H | 8.17415600  | 6.07606200 | -2.63480900 |
| H | 6.20214400  | 7.24575800 | -1.66695400 |
| H | 4.37373700  | 5.94326100 | -0.62339400 |
| O | 1.51821400  | 2.23022000 | 0.32537700  |
| O | 1.46631700  | 1.04117800 | -1.52088800 |
| H | 4.54516600  | 2.30896200 | 0.06876500  |

**Int1**

|   |             |            |             |
|---|-------------|------------|-------------|
| C | -0.05457500 | 3.54119100 | -1.56920700 |
| C | -1.44754100 | 3.68405500 | -1.69817300 |
| H | -2.11024600 | 3.05137400 | -1.11457000 |
| C | -1.99537900 | 4.61545000 | -2.58234000 |
| C | -1.12735700 | 5.40689200 | -3.34968000 |
| H | -1.54560100 | 6.13258100 | -4.04571500 |
| C | 0.25872100  | 5.28428700 | -3.24537100 |
| C | 0.78615500  | 4.34802000 | -2.34059200 |
| H | 1.86370000  | 4.25690200 | -2.25145900 |
| C | -3.49353100 | 4.77794500 | -2.70751300 |
| H | -4.02517100 | 3.99744200 | -2.15448400 |
| H | -3.81509700 | 4.72913100 | -3.75494500 |
| H | -3.82432700 | 5.74833600 | -2.31455500 |
| C | 1.18240800  | 6.11961800 | -4.10306000 |
| H | 1.53612500  | 5.55165900 | -4.97380800 |

|   |             |             |             |
|---|-------------|-------------|-------------|
| H | 2.06998300  | 6.43862000  | -3.54494400 |
| H | 0.67832900  | 7.01596900  | -4.47946400 |
| C | 0.18315600  | 3.23710500  | 1.23695000  |
| C | 0.31304900  | 4.63857200  | 1.26341700  |
| H | 0.62656500  | 5.16803600  | 0.36920400  |
| C | 0.03183900  | 5.37003400  | 2.41803300  |
| C | -0.39141300 | 4.67781400  | 3.56308900  |
| H | -0.62246600 | 5.23899300  | 4.46740700  |
| C | -0.52917900 | 3.28988700  | 3.57061800  |
| C | -0.23757100 | 2.58109600  | 2.39343400  |
| H | -0.33953800 | 1.50476000  | 2.39080600  |
| C | 0.16566300  | 6.87610700  | 2.43853400  |
| H | -0.79365600 | 7.35899600  | 2.66340400  |
| H | 0.51275400  | 7.25899100  | 1.47387200  |
| H | 0.87770200  | 7.20487100  | 3.20605300  |
| C | -0.96615100 | 2.55443100  | 4.81670800  |
| H | -1.71507600 | 1.78832300  | 4.58655000  |
| H | -1.39247700 | 3.23959400  | 5.55683400  |
| H | -0.11924000 | 2.03960000  | 5.28847200  |
| C | 2.40079000  | 2.44426800  | -0.47941700 |
| C | 2.99732800  | 1.98762400  | -1.66838400 |
| H | 2.38280900  | 1.55531900  | -2.45223600 |
| C | 4.37484000  | 2.09911300  | -1.87063100 |
| C | 5.15904200  | 2.66841900  | -0.85458700 |
| H | 6.23410200  | 2.76071100  | -1.00216800 |
| C | 4.59510200  | 3.12194300  | 0.33966400  |
| C | 3.20703900  | 3.00002900  | 0.51791400  |
| H | 2.76324400  | 3.35326000  | 1.44336100  |
| C | 5.00605900  | 1.62738500  | -3.16160200 |
| H | 5.45493900  | 2.46234300  | -3.71502600 |
| H | 4.26619900  | 1.15268400  | -3.81288400 |
| H | 5.80749000  | 0.90174200  | -2.97374700 |
| C | 5.44749000  | 3.74983200  | 1.41986300  |
| H | 5.21376800  | 4.81517500  | 1.54344500  |
| H | 6.51373500  | 3.66979800  | 1.18485400  |
| C | 0.10590400  | -2.84554000 | 0.69150800  |
| C | -0.61010800 | -3.46590600 | -0.34193200 |
| H | -1.36099900 | -2.90644200 | -0.88798500 |
| C | -0.36465100 | -4.80069200 | -0.68768600 |
| C | 0.61882100  | -5.50951900 | 0.01165200  |
| H | 0.81747200  | -6.54696600 | -0.25390400 |
| C | 1.35194700  | -4.91638400 | 1.04560500  |
| C | 1.08056000  | -3.58338900 | 1.38047600  |
| H | 1.64636700  | -3.12563900 | 2.18432700  |

|    |             |             |             |   |             |             |             |
|----|-------------|-------------|-------------|---|-------------|-------------|-------------|
| C  | -1.16762400 | -5.46309500 | -1.78491300 | P | -0.28649300 | -1.08213000 | 1.14794400  |
| H  | -1.39293500 | -4.75909800 | -2.59287500 | H | 5.27950000  | 3.27036200  | 2.39159800  |
| H  | -2.12755000 | -5.83725300 | -1.40395000 | C | -3.03669200 | -0.21002100 | -1.06186300 |
| H  | -0.63262600 | -6.31657900 | -2.21494600 | C | -4.53400400 | -0.40060800 | -1.18516700 |
| C  | 2.44009700  | -5.68384600 | 1.76277100  | C | -4.94944700 | -1.44011500 | -2.24285700 |
| H  | 2.18124200  | -6.74333000 | 1.86951700  | C | -6.45249000 | -1.60460900 | -2.32524100 |
| H  | 2.62533300  | -5.27707200 | 2.76252200  | C | -7.12221400 | -2.51859100 | -1.49957600 |
| H  | 3.38733100  | -5.63414100 | 1.20923600  | C | -8.51086600 | -2.64988400 | -1.55067000 |
| C  | -1.79505200 | -1.27700400 | 2.20760900  | C | -9.25706900 | -1.86603100 | -2.43331400 |
| C  | -2.06607500 | -2.48296400 | 2.87620800  | C | -8.60328800 | -0.95305500 | -3.26305300 |
| H  | -1.39367000 | -3.32721200 | 2.75984900  | C | -7.21430000 | -0.82584200 | -3.20733700 |
| C  | -3.19639400 | -2.62253100 | 3.68692300  | H | -4.90546000 | -0.70216500 | -0.19556100 |
| C  | -4.06250500 | -1.52881800 | 3.82321100  | H | -4.98537100 | 0.57631300  | -1.39203000 |
| H  | -4.94977800 | -1.62996600 | 4.44666200  | H | -4.55106900 | -1.13540900 | -3.21770000 |
| C  | -3.82223700 | -0.31614900 | 3.17170500  | H | -6.54683800 | -3.13801600 | -0.81426400 |
| C  | -2.68144100 | -0.20273600 | 2.36184400  | H | -9.00953800 | -3.36871600 | -0.90527500 |
| H  | -2.50937800 | 0.72109600  | 1.82183300  | H | 10.33801400 | -1.96970600 | -2.47769700 |
| C  | -3.49342800 | -3.92891400 | 4.38846200  | H | -9.17396500 | -0.34272000 | -3.95848900 |
| H  | -2.66157100 | -4.63325900 | 4.29028100  | H | -6.71145900 | -0.11706100 | -3.86229100 |
| H  | -4.38663600 | -4.41125200 | 3.97081700  | O | -2.58023200 | 0.85479100  | -0.52351100 |
| H  | -3.68195100 | -3.77636600 | 5.45811200  | O | -2.22101300 | -1.09444000 | -1.46521900 |
| C  | -4.76102900 | 0.85816800  | 3.33751700  | H | -4.47444600 | -2.39637900 | -2.00061500 |
| H  | -4.41489300 | 1.53801700  | 4.12773600  | C | 1.63428600  | -0.89715300 | -2.56227400 |
| H  | -5.76970000 | 0.52974100  | 3.60975500  | C | 2.69710300  | -1.96384100 | -2.84137600 |
| H  | -4.82953500 | 1.44484800  | 2.41533000  | C | 3.65993300  | -2.25525700 | -1.67564000 |
| C  | 1.06577900  | -0.71530300 | 2.35779000  | C | 4.64695700  | -3.35686500 | -1.99958400 |
| C  | 0.86976700  | -0.75157900 | 3.74552000  | C | 4.27781700  | -4.70543700 | -1.87668800 |
| H  | -0.11924500 | -0.94264400 | 4.15026600  | C | 5.17158500  | -5.72755000 | -2.19953200 |
| C  | 1.93944800  | -0.55573800 | 4.62770600  | C | 6.45701500  | -5.42009300 | -2.65230300 |
| C  | 3.21684800  | -0.35029300 | 4.09377200  | C | 6.83812900  | -4.08333000 | -2.77923800 |
| H  | 4.05909600  | -0.21840200 | 4.77128500  | C | 5.93937800  | -3.06461500 | -2.45529700 |
| C  | 3.44420700  | -0.32156100 | 2.71302700  | H | 2.15527800  | -2.88399800 | -3.10180100 |
| C  | 2.35255000  | -0.48536200 | 1.84968800  | H | 3.24454500  | -1.66607000 | -3.74157300 |
| H  | 2.50602100  | -0.46628900 | 0.77433000  | H | 4.20093400  | -1.33583600 | -1.41885800 |
| C  | 4.84312100  | -0.16854600 | 2.16186300  | H | 3.27798700  | -4.95115600 | -1.52414100 |
| H  | 4.85638500  | 0.47069400  | 1.27403200  | H | 4.86544900  | -6.76577100 | -2.09549800 |
| H  | 5.25702100  | -1.14261600 | 1.86876100  | H | 7.15502100  | -6.21506400 | -2.90170000 |
| H  | 5.52124500  | 0.26302400  | 2.90617600  | H | 7.83675900  | -3.83210700 | -3.12835100 |
| C  | 1.71815700  | -0.55960200 | 6.12375300  | H | 6.24535700  | -2.02481000 | -2.55442500 |
| H  | 1.58945900  | 0.46004300  | 6.51211300  | O | 1.17921400  | -0.23293700 | -3.50956200 |
| H  | 2.56978000  | -1.00005900 | 6.65415700  | O | 1.26898800  | -0.79188600 | -1.32528800 |
| H  | 0.82066700  | -1.12574700 | 6.39428000  | H | 3.06530600  | -2.52775800 | -0.79852400 |
| Ru | -0.50314000 | 0.25283500  | -0.82316600 | H | -0.87549300 | 1.08876900  | -2.45345700 |
| P  | 0.56304500  | 2.30092100  | -0.32309600 | H | -0.25265000 | 0.65862300  | -2.72054100 |



**TS1**

|   |             |            |             |   |             |             |             |
|---|-------------|------------|-------------|---|-------------|-------------|-------------|
| C | 0.17956100  | 3.61464000 | -1.42213700 | H | 3.49158100  | 1.33754800  | 0.64639300  |
| C | -1.12617900 | 3.63647800 | -1.91588300 | C | 4.07818200  | 2.06928700  | -4.67505000 |
| H | -1.76465700 | 2.76902000 | -1.78759900 | H | 3.79497600  | 3.08249600  | -4.98552100 |
| C | -1.63053000 | 4.77622700 | -2.56615400 | H | 3.42906500  | 1.37244600  | -5.21948400 |
| C | -0.80228600 | 5.88884500 | -2.70952900 | H | 5.10890900  | 1.89432900  | -5.00011300 |
| H | -1.18514500 | 6.77563200 | -3.21285600 | C | 6.04540900  | 0.82593300  | -0.17933400 |
| C | 0.51300000  | 5.89732100 | -2.21759700 | H | 6.98744000  | 1.21694900  | -0.57953300 |
| C | 0.98814800  | 4.75583400 | -1.57276300 | H | 6.12846200  | -0.26953100 | -0.17197900 |
| H | 2.00326900  | 4.75562400 | -1.18591600 | C | -0.17136000 | -2.70936300 | 1.09489100  |
| C | -3.04263700 | 4.77600200 | -3.10673800 | C | -0.63139300 | -3.36272400 | -0.05777500 |
| H | -3.76233700 | 4.46221900 | -2.34134400 | H | -1.18948800 | -2.80637100 | -0.80166200 |
| H | -3.14599700 | 4.07878500 | -3.94827700 | C | -0.39038600 | -4.72730800 | -0.25868000 |
| H | -3.33684900 | 5.76956000 | -3.46076500 | C | 0.33186000  | -5.43396600 | 0.71020100  |
| C | 1.38632400  | 7.12016000 | -2.38698700 | H | 0.52832200  | -6.49474800 | 0.55947900  |
| H | 1.54606500  | 7.35570800 | -3.44698400 | C | 0.80145700  | -4.81129700 | 1.87192600  |
| H | 2.36894500  | 6.97578400 | -1.92667800 | C | 0.53741100  | -3.44758800 | 2.05492000  |
| H | 0.92882400  | 8.00551300 | -1.92772300 | H | 0.89918000  | -2.96329800 | 2.95605800  |
| C | 1.01265200  | 2.93521000 | 1.17326800  | C | -0.92461700 | -5.42506200 | -1.48970400 |
| C | 2.16342900  | 3.62308600 | 1.58766200  | H | -1.02132700 | -4.73067400 | -2.33053400 |
| H | 3.05211700  | 3.62586400 | 0.96493400  | H | -1.92028600 | -5.85022300 | -1.30398200 |
| C | 2.18986300  | 4.31781400 | 2.80141700  | H | -0.27339200 | -6.24977700 | -1.80020700 |
| C | 1.03116400  | 4.34080100 | 3.58880000  | C | 1.60307000  | -5.58389800 | 2.89580100  |
| H | 1.03818900  | 4.89172200 | 4.52811500  | H | 1.28787600  | -6.63211400 | 2.94458000  |
| C | -0.13609400 | 3.68208500 | 3.19371400  | H | 1.49771900  | -5.15136800 | 3.89653000  |
| C | -0.12477700 | 2.97339100 | 1.98564100  | H | 2.67369600  | -5.57802000 | 2.65065400  |
| H | -1.02339000 | 2.45499800 | 1.66455900  | C | -2.18166500 | -0.93653000 | 2.20115600  |
| C | 3.44698200  | 5.02000900 | 3.26305400  | C | -2.61121700 | -2.06448500 | 2.91942000  |
| H | 3.21881600  | 5.98041900 | 3.73925400  | H | -1.99693200 | -2.95908200 | 2.93704000  |
| H | 4.12906900  | 5.21067600 | 2.42800700  | C | -3.82590700 | -2.06205600 | 3.61133600  |
| H | 3.99261600  | 4.41595100 | 4.00055700  | C | -4.61276100 | -0.90204600 | 3.58211700  |
| C | -1.39277300 | 3.74209600 | 4.03216000  | H | -5.56185200 | -0.89071800 | 4.11624800  |
| H | -2.15631100 | 4.37267500 | 3.55812600  | C | -4.21507000 | 0.23650500  | 2.87670000  |
| H | -1.19319500 | 4.15770700 | 5.02540400  | C | -2.99490300 | 0.20383500  | 2.18424700  |
| H | -1.83246800 | 2.74623000 | 4.16197100  | H | -2.70169000 | 1.06229300  | 1.59109000  |
| C | 2.52075600  | 1.94320000 | -1.18680900 | C | -4.29469600 | -3.28848800 | 4.36165000  |
| C | 2.69306800  | 2.11853900 | -2.56568300 | H | -3.49777500 | -4.03398200 | 4.44510400  |
| H | 1.85520700  | 2.43825300 | -3.17800300 | H | -5.14236000 | -3.76686400 | 3.85369500  |
| C | 3.92924900  | 1.88751200 | -3.18204500 | H | -4.62906300 | -3.03583900 | 5.37505200  |
| C | 5.00521100  | 1.48578000 | -2.38598600 | C | -5.06867500 | 1.48484800  | 2.85895600  |
| H | 5.97725000  | 1.32284600 | -2.84875700 | H | -4.69393000 | 2.23529300  | 3.56796600  |
| C | 4.86487200  | 1.28657000 | -1.00598100 | H | -6.10590400 | 1.26529300  | 3.13264100  |
| C | 3.61201900  | 1.50465000 | -0.41966900 | H | -5.06873500 | 1.95088900  | 1.86749800  |
|   |             |            |             | C | 0.63442400  | -0.43696800 | 2.65898500  |
|   |             |            |             | C | 0.21429500  | -0.02052600 | 3.92430900  |

|    |             |             |             |             |             |             |             |
|----|-------------|-------------|-------------|-------------|-------------|-------------|-------------|
| H  | -0.84570900 | 0.05322500  | 4.14602600  | C           | 5.24950800  | -5.96429700 | -1.90475200 |
| C  | 1.14264700  | 0.29383700  | 4.92887100  | C           | 6.48038400  | -5.56717300 | -2.43051700 |
| C  | 2.50195600  | 0.15082900  | 4.64915400  | C           | 6.73798400  | -4.20843100 | -2.62712200 |
| H  | 3.23038900  | 0.36691500  | 5.42945500  | C           | 5.76988100  | -3.25783500 | -2.30052800 |
| C  | 2.95462500  | -0.27309300 | 3.39056200  | H           | 2.20832700  | -3.04971600 | -3.16451300 |
| C  | 2.01145100  | -0.54571000 | 2.39655600  | H           | 3.32642300  | -1.73337700 | -3.44252800 |
| H  | 2.34431300  | -0.87625300 | 1.41593300  | H           | 3.93264500  | -1.72208500 | -1.00070200 |
| C  | 4.43441000  | -0.44978700 | 3.13707100  | H           | 3.32954600  | -5.32262100 | -1.16262100 |
| H  | 4.62516400  | -0.84063700 | 2.13349600  | H           | 5.04099700  | -7.01918100 | -1.74382100 |
| H  | 4.87976700  | -1.14781400 | 3.85699000  | H           | 7.23383300  | -6.30907200 | -2.68190000 |
| H  | 4.97591500  | 0.49979600  | 3.23738000  | H           | 7.69501900  | -3.88868900 | -3.03208900 |
| C  | 0.67316700  | 0.78885000  | 6.27750600  | H           | 5.97750500  | -2.20055100 | -2.45535500 |
| H  | 0.49860200  | 1.87301100  | 6.25763800  | O           | 0.97559500  | -0.64940800 | -3.39814400 |
| H  | 1.41483500  | 0.59145900  | 7.05891500  | O           | 1.24330400  | -0.95992700 | -1.18919600 |
| H  | -0.26841300 | 0.31409100  | 6.57473100  | H           | 2.77461700  | -3.00814700 | -0.69899100 |
| Ru | -0.49471600 | 0.22571100  | -0.83139800 | H           | -0.55154000 | 0.83724900  | -2.48682600 |
| P  | 0.81514500  | 2.13239200  | -0.48855200 | H           | 0.04113100  | 0.20718700  | -2.83308400 |
| P  | -0.55132400 | -0.89948700 | 1.31539900  |             |             |             |             |
| H  | 5.95997000  | 1.15174700  | 0.86207000  |             |             |             |             |
| C  | -3.02439400 | -0.10767100 | -1.20112800 | <b>Int2</b> |             |             |             |
| C  | -4.51924500 | -0.22965200 | -1.41145400 | C           | 0.05693000  | 3.84844900  | -1.06528000 |
| C  | -4.91242100 | -1.26053700 | -2.48695100 | C           | -1.18503800 | 3.83787700  | -1.70261400 |
| C  | -6.41334400 | -1.39013000 | -2.63787500 | H           | -1.71720300 | 2.90028500  | -1.81402000 |
| C  | -7.13829300 | -2.29921300 | -1.85444700 | C           | -1.76055600 | 5.02847000  | -2.17930600 |
| C  | -8.52586600 | -2.39933500 | -1.96768500 | C           | -1.06504200 | 6.22535600  | -2.01020700 |
| C  | -9.21583500 | -1.58874100 | -2.87154700 | H           | -1.50455100 | 7.15252900  | -2.37582200 |
| C  | -8.50675900 | -0.68028100 | -3.65993600 | C           | 0.18588800  | 6.26687500  | -1.37331700 |
| C  | -7.11913900 | -0.58427300 | -3.54200000 | C           | 0.73006500  | 5.07299800  | -0.90091100 |
| H  | -4.96086400 | -0.51176800 | -0.44518000 | H           | 1.69080700  | 5.09929400  | -0.39469700 |
| H  | -4.91503800 | 0.76339600  | -1.65059400 | C           | -3.10950500 | 4.99537200  | -2.86177000 |
| H  | -4.46379400 | -0.96627600 | -3.44341200 | H           | -3.87023200 | 4.54012500  | -2.21594300 |
| H  | -6.60701900 | -2.93934000 | -1.15280700 | H           | -3.07563800 | 4.40072200  | -3.78356600 |
| H  | -9.06750500 | -3.11487900 | -1.35401400 | H           | -3.45031200 | 6.00183600  | -3.12639900 |
| H  | 10.29579000 | -1.66799800 | -2.96438100 | C           | 0.92216700  | 7.57801900  | -1.21244800 |
| H  | -9.03313500 | -0.04893800 | -4.37143400 | H           | 1.27578700  | 7.96142300  | -2.17877300 |
| H  | -6.57311600 | 0.12150900  | -4.16490600 | H           | 1.79525900  | 7.46757000  | -0.56134700 |
| O  | -2.53875500 | 0.98034500  | -0.73855300 | H           | 0.27565600  | 8.35056800  | -0.77860200 |
| O  | -2.24294100 | -1.07425300 | -1.45281300 | C           | 1.21020400  | 2.83915000  | 1.31250900  |
| H  | -4.47056000 | -2.22626900 | -2.22167100 | C           | 2.42584400  | 3.43211700  | 1.69039800  |
| C  | 1.55231600  | -1.18275200 | -2.40416900 | H           | 3.23328000  | 3.52414400  | 0.97054500  |
| C  | 2.66996700  | -2.17610000 | -2.68495500 | C           | 2.62076500  | 3.91798300  | 2.98766400  |
| C  | 3.46961500  | -2.61101200 | -1.44508700 | C           | 1.56918600  | 3.81575400  | 3.90818000  |
| C  | 4.52847400  | -3.64214700 | -1.77268800 | H           | 1.70884900  | 4.19585000  | 4.91906700  |
| C  | 4.28469000  | -5.00886500 | -1.57910500 | C           | 0.34441100  | 3.24086800  | 3.56008900  |
|    |             |             |             | C           | 0.18320600  | 2.75159200  | 2.25721900  |

|   |             |             |             |    |             |             |             |
|---|-------------|-------------|-------------|----|-------------|-------------|-------------|
| H | -0.76244800 | 2.29733400  | 1.97327300  | H  | -2.10655100 | -3.27949300 | 2.48682500  |
| C | 3.93976300  | 4.53609300  | 3.39552800  | C  | -3.93861000 | -2.42610000 | 3.21430600  |
| H | 3.79187600  | 5.49002200  | 3.91574600  | C  | -4.67948900 | -1.24243500 | 3.34134200  |
| H | 4.57973000  | 4.72266000  | 2.52695500  | H  | -5.65559100 | -1.27646300 | 3.82349700  |
| H | 4.49464800  | 3.88076500  | 4.08013400  | C  | -4.20195500 | -0.02122600 | 2.85736200  |
| C | -0.78628600 | 3.13864700  | 4.55778900  | C  | -2.95075100 | 0.00474500  | 2.22364600  |
| H | -1.67478500 | 3.68135800  | 4.21142300  | H  | -2.59113000 | 0.93581800  | 1.79794000  |
| H | -0.50102100 | 3.55250500  | 5.53058200  | C  | -4.48825900 | -3.73502900 | 3.73580200  |
| H | -1.08350600 | 2.09370700  | 4.70791100  | H  | -3.75751700 | -4.54333200 | 3.63269100  |
| C | 2.44592200  | 2.23483200  | -1.28419800 | H  | -5.39311700 | -4.03368600 | 3.19096700  |
| C | 2.56818000  | 2.76799000  | -2.57344800 | H  | -4.76214200 | -3.66228700 | 4.79565000  |
| H | 1.72525400  | 3.28394600  | -3.02359700 | C  | -5.00379500 | 1.25094300  | 3.01720300  |
| C | 3.75957700  | 2.64984000  | -3.30202300 | H  | -4.65746000 | 1.83372800  | 3.88144500  |
| C | 4.84383100  | 1.99582100  | -2.70974100 | H  | -6.06708400 | 1.03897400  | 3.17124800  |
| H | 5.77932400  | 1.91075300  | -3.26067700 | H  | -4.90816400 | 1.89381700  | 2.13545200  |
| C | 4.75545000  | 1.44786200  | -1.42316300 | C  | 0.60472100  | -0.73340700 | 2.71868600  |
| C | 3.54505500  | 1.55906000  | -0.72992100 | C  | 0.17015900  | -0.76814700 | 4.05072800  |
| H | 3.46573100  | 1.12387000  | 0.26172900  | H  | -0.87401200 | -0.96371600 | 4.27363900  |
| C | 3.85543400  | 3.20414500  | -4.70547400 | C  | 1.06574800  | -0.57071000 | 5.10892200  |
| H | 3.34121400  | 4.16791900  | -4.79040600 | C  | 2.41556500  | -0.35189800 | 4.81150000  |
| H | 3.38968800  | 2.52522500  | -5.43204300 | H  | 3.12311400  | -0.20914400 | 5.62683700  |
| H | 4.89751900  | 3.34708500  | -5.01033600 | C  | 2.88065800  | -0.31502600 | 3.49234900  |
| C | 5.95720000  | 0.78530800  | -0.78656000 | C  | 1.96101700  | -0.50209600 | 2.45355600  |
| H | 6.61889700  | 1.52648800  | -0.31813500 | H  | 2.30521900  | -0.48635200 | 1.42224900  |
| H | 6.55759500  | 0.24370400  | -1.52653700 | C  | 4.33969700  | -0.05474600 | 3.19408900  |
| C | -0.13788600 | -2.79942700 | 0.85596900  | H  | 4.70785500  | -0.70373700 | 2.39079400  |
| C | -0.76591200 | -3.36441500 | -0.26589900 | H  | 4.96599600  | -0.22471400 | 4.07622900  |
| H | -1.45170600 | -2.76243700 | -0.85372300 | H  | 4.49636400  | 0.98346100  | 2.87273700  |
| C | -0.52268500 | -4.69181700 | -0.63808200 | C  | 0.58325400  | -0.58327300 | 6.54209900  |
| C | 0.37952000  | -5.44967700 | 0.11934600  | H  | 0.41280500  | 0.43616500  | 6.91367800  |
| H | 0.57654900  | -6.48312800 | -0.16406600 | H  | 1.31659300  | -1.05092900 | 7.20889000  |
| C | 1.02869300  | -4.91176200 | 1.23642700  | H  | -0.36110700 | -1.12851300 | 6.64155500  |
| C | 0.75397800  | -3.58571400 | 1.59910300  | Ru | -0.43262200 | 0.37745300  | -0.83196400 |
| H | 1.24998300  | -3.17045700 | 2.47012400  | P  | 0.80679200  | 2.27192500  | -0.41240300 |
| C | -1.24060300 | -5.30023200 | -1.82253500 | P  | -0.52235300 | -1.02426200 | 1.27474300  |
| H | -1.55838700 | -4.53057200 | -2.53315000 | H  | 5.66176900  | 0.07668500  | -0.00561000 |
| H | -2.14144600 | -5.84256400 | -1.50473900 | C  | -2.96403300 | 0.05228500  | -1.17852800 |
| H | -0.60462500 | -6.01634300 | -2.35533400 | C  | -4.46877500 | -0.03817200 | -1.33610600 |
| C | 2.02521900  | -5.73605600 | 2.02106800  | C  | -4.92168000 | -1.01974200 | -2.43325600 |
| H | 1.68597500  | -6.77167700 | 2.13943500  | C  | -6.42941500 | -1.11150300 | -2.53658800 |
| H | 2.19167700  | -5.31822100 | 3.01929000  | C  | -7.15093100 | -2.00993000 | -1.73759300 |
| H | 2.99861700  | -5.77070200 | 1.51353900  | C  | -8.54337400 | -2.07556900 | -1.80637700 |
| C | -2.18295900 | -1.15888600 | 2.08758800  | C  | -9.24248700 | -1.24033100 | -2.68046000 |
| C | -2.68954100 | -2.36906500 | 2.58825900  | C  | -8.53729900 | -0.34190000 | -3.48352600 |

|            |             |             |             |   |             |             |             |
|------------|-------------|-------------|-------------|---|-------------|-------------|-------------|
| C          | -7.14455900 | -0.28048600 | -3.40996200 | H | -2.24330500 | -0.88911100 | -4.04701900 |
| H          | -4.88028400 | -0.34729500 | -0.36505400 | C | -2.44087900 | 4.47268100  | -3.46693800 |
| H          | -4.85535400 | 0.96975600  | -1.52379000 | H | -1.55625000 | 4.85204100  | -2.94259700 |
| H          | -4.49925200 | -0.70159900 | -3.39387000 | H | -3.31760100 | 4.77102300  | -2.87708100 |
| H          | -6.61297800 | -2.66822000 | -1.05818700 | H | -2.50563200 | 4.98269400  | -4.43372500 |
| H          | -9.08223700 | -2.78317400 | -1.18108800 | C | -3.00460200 | 0.34408600  | -6.34164400 |
| H          | 10.32653700 | -1.29249300 | -2.73843300 | H | -3.95002400 | 0.73004600  | -6.74177100 |
| H          | -9.07086600 | 0.30907800  | -4.17164200 | H | -3.09323900 | -0.74384100 | -6.25784700 |
| H          | -6.60197300 | 0.41848600  | -4.04344200 | H | -2.22947500 | 0.55503500  | -7.09006300 |
| O          | -2.45469300 | 1.09446000  | -0.64217900 | C | -0.98194500 | -1.84961100 | -2.08547900 |
| O          | -2.20183500 | -0.89281800 | -1.54293300 | C | -1.72141000 | -3.03409000 | -2.05504800 |
| H          | -4.49375800 | -2.00424800 | -2.21805500 | H | -2.62898100 | -3.09353100 | -1.46306000 |
| C          | 1.65807200  | -1.07560000 | -2.44247500 | C | -1.32088200 | -4.15603600 | -2.79814300 |
| C          | 2.74352400  | -2.06794400 | -2.77952400 | C | -0.16371500 | -4.06602600 | -3.57395900 |
| C          | 3.45604500  | -2.64973000 | -1.54744100 | H | 0.14398100  | -4.92398900 | -4.17013200 |
| C          | 4.43022600  | -3.74834100 | -1.91886900 | C | 0.60534500  | -2.89340200 | -3.61656900 |
| C          | 4.03155300  | -5.09228800 | -1.89181000 | C | 0.18490300  | -1.79194500 | -2.86793000 |
| C          | 4.91356700  | -6.10931000 | -2.26208600 | H | 0.75249600  | -0.86585400 | -2.91596400 |
| C          | 6.21313800  | -5.79778500 | -2.66642800 | C | -2.13416600 | -5.42928900 | -2.75329300 |
| C          | 6.62381700  | -4.46330000 | -2.69547500 | H | -1.84973200 | -6.11562200 | -3.55786500 |
| C          | 5.73851000  | -3.45004900 | -2.32419400 | H | -3.20697400 | -5.22395900 | -2.84798100 |
| H          | 2.27627300  | -2.86768200 | -3.36908900 | H | -1.98869900 | -5.95293500 | -1.80000600 |
| H          | 3.45297500  | -1.57714600 | -3.45716700 | C | 1.86269000  | -2.83049000 | -4.45350300 |
| H          | 3.97761800  | -1.83808600 | -1.02764600 | H | 2.12956800  | -1.79721200 | -4.69756200 |
| H          | 3.02131900  | -5.33900700 | -1.57156300 | H | 1.74739900  | -3.38231600 | -5.39342600 |
| H          | 4.58651400  | -7.14561500 | -2.23113600 | H | 2.71570500  | -3.27194000 | -3.92097500 |
| H          | 6.90187500  | -6.58832100 | -2.95240700 | C | -3.16481600 | -0.70041800 | -0.50720600 |
| H          | 7.63547900  | -4.21126800 | -3.00338700 | C | -4.28020700 | -0.93695100 | -1.32774300 |
| H          | 6.06804400  | -2.41291300 | -2.34369100 | H | -4.18230700 | -0.86982600 | -2.40694300 |
| O          | 1.05037600  | -0.54915300 | -3.48263300 | C | -5.52964300 | -1.24653700 | -0.78182400 |
| O          | 1.35049300  | -0.80171300 | -1.27221000 | C | -5.65189300 | -1.31845100 | 0.61282900  |
| H          | 2.70291500  | -3.03337300 | -0.85236600 | H | -6.62132900 | -1.55775000 | 1.04839500  |
| H          | -0.46893400 | 1.06669900  | -2.34026800 | C | -4.56435500 | -1.07768400 | 1.45833900  |
| H          | 0.35333400  | 0.09349300  | -3.10809800 | C | -3.32272600 | -0.76308900 | 0.88345000  |
|            |             |             |             | H | -2.48381800 | -0.51438200 | 1.52456900  |
| <b>TS2</b> |             |             |             | C | -6.73109800 | -1.47554100 | -1.67131800 |
| C          | -1.94324100 | 0.76348900  | -2.68207200 | H | -6.43620600 | -1.59091300 | -2.71912500 |
| C          | -1.99155400 | 2.15586100  | -2.56305800 | H | -7.43269600 | -0.63271600 | -1.61796800 |
| H          | -1.70427000 | 2.62243700  | -1.62683200 | H | -7.28534400 | -2.37420900 | -1.37524800 |
| C          | -2.37863200 | 2.97133400  | -3.63610800 | C | -4.71359700 | -1.16979300 | 2.96158600  |
| C          | -2.71124800 | 2.36651000  | -4.84967800 | H | -4.64000900 | -2.21018900 | 3.30586000  |
| H          | -3.00482300 | 2.99037600  | -5.69265700 | H | -5.68513000 | -0.78789200 | 3.29466000  |
| C          | -2.66744000 | 0.97521300  | -5.00927100 | C | 1.52891900  | -1.11172400 | 2.82577100  |
| C          | -2.28537300 | 0.18769900  | -3.91934300 | C | 1.95511000  | 0.13385600  | 3.30290600  |

|   |             |             |             |    |             |             |             |
|---|-------------|-------------|-------------|----|-------------|-------------|-------------|
| H | 2.14428300  | 0.93811900  | 2.60011300  | H  | -3.34113400 | -3.98848400 | 1.67513800  |
| C | 2.15560000  | 0.35732400  | 4.67138700  | C  | 1.42515300  | -6.48644500 | -0.50627000 |
| C | 1.92641600  | -0.69344600 | 5.56321000  | H  | 1.30399700  | -6.41641800 | -1.59549900 |
| H | 2.07835800  | -0.52927500 | 6.62908200  | H  | 1.04253500  | -7.46394400 | -0.19382600 |
| C | 1.50840000  | -1.95373900 | 5.11762400  | H  | 2.50089000  | -6.46105600 | -0.29896700 |
| C | 1.31694700  | -2.15091900 | 3.74570000  | Ru | 0.13586200  | 0.65650200  | 0.12774600  |
| H | 1.00298200  | -3.12927400 | 3.39836500  | P  | -1.48830200 | -0.29775000 | -1.20774100 |
| C | 2.59181600  | 1.71984400  | 5.16128400  | P  | 1.32619600  | -1.31558700 | 0.98592100  |
| H | 1.80099500  | 2.46551800  | 5.00822900  | H  | -3.92984700 | -0.60242100 | 3.47358500  |
| H | 3.47729800  | 2.07539000  | 4.62078500  | C  | 2.30992800  | 1.84522200  | -0.59153300 |
| H | 2.83225200  | 1.70503800  | 6.22942200  | C  | 3.58202400  | 2.50703700  | -1.07641700 |
| C | 1.25873700  | -3.07346800 | 6.10333400  | C  | 3.95591900  | 3.78324200  | -0.29745200 |
| H | 2.08849300  | -3.17749000 | 6.81287800  | C  | 5.26624300  | 4.37875400  | -0.76787900 |
| H | 1.12976000  | -4.03361400 | 5.59329200  | C  | 6.48513400  | 3.94576700  | -0.22663200 |
| H | 0.35215300  | -2.88973700 | 6.69505400  | C  | 7.69820100  | 4.46473100  | -0.68148400 |
| C | 3.08726900  | -1.59334900 | 0.45771600  | C  | 7.71305000  | 5.43136700  | -1.68939900 |
| C | 4.06257400  | -2.06013400 | 1.35269700  | C  | 6.50675100  | 5.87363400  | -2.23584900 |
| H | 3.79605600  | -2.25624500 | 2.38660100  | C  | 5.29631900  | 5.35044100  | -1.77746900 |
| C | 5.38184400  | -2.27428900 | 0.94012300  | H  | 4.38755800  | 1.76568900  | -0.97826600 |
| C | 5.71591400  | -2.01570900 | -0.39524400 | H  | 3.47752400  | 2.71193400  | -2.14698300 |
| H | 6.74169200  | -2.17365100 | -0.72592700 | H  | 3.14953400  | 4.51862300  | -0.40699700 |
| C | 4.76777000  | -1.55350600 | -1.31336500 | H  | 6.48098300  | 3.19728600  | 0.56333900  |
| C | 3.45290800  | -1.34411200 | -0.87223500 | H  | 8.63157300  | 4.11840900  | -0.24469300 |
| H | 2.71365700  | -0.96007500 | -1.56550300 | H  | 8.65635200  | 5.83973200  | -2.04240100 |
| C | 6.43292500  | -2.74836600 | 1.91871800  | H  | 6.50691300  | 6.62982800  | -3.01686100 |
| H | 5.97783600  | -3.18877100 | 2.81157700  | H  | 4.36003200  | 5.70376000  | -2.20481300 |
| H | 7.07060600  | -1.91845300 | 2.25134700  | O  | 1.60706200  | 1.15833300  | -1.39894600 |
| H | 7.09154200  | -3.49974300 | 1.46782800  | O  | 1.95110000  | 1.93448900  | 0.63172800  |
| C | 5.14958900  | -1.29710700 | -2.75454100 | H  | 4.01116200  | 3.53640300  | 0.76779300  |
| H | 5.07113100  | -2.21136300 | -3.35820400 | C  | -1.10814800 | 2.25398600  | 1.46864500  |
| H | 6.18301500  | -0.94303100 | -2.83824800 | C  | -2.49773100 | 2.83853100  | 1.24958200  |
| H | 4.49576900  | -0.54801600 | -3.21286200 | C  | -3.18958500 | 3.12409000  | 2.60454900  |
| C | 0.59936900  | -3.01584100 | 0.86059100  | C  | -4.55410100 | 3.75459700  | 2.42448700  |
| C | 1.27242800  | -4.08038400 | 0.25142300  | C  | -4.74300300 | 5.12786400  | 2.62901600  |
| H | 2.25680000  | -3.92313000 | -0.17769800 | C  | -5.99476700 | 5.71794800  | 2.44174000  |
| C | 0.69988500  | -5.35753500 | 0.18955900  | C  | -7.08282800 | 4.93976000  | 2.04375400  |
| C | -0.55785800 | -5.55728100 | 0.76773900  | C  | -6.90822100 | 3.56948100  | 1.83425600  |
| H | -1.00171800 | -6.55145100 | 0.74501200  | C  | -5.65591600 | 2.98407100  | 2.02318900  |
| C | -1.26110300 | -4.51033100 | 1.37702600  | H  | -2.41340000 | 3.76569000  | 0.67476200  |
| C | -0.67315700 | -3.24131200 | 1.40641200  | H  | -3.09256100 | 2.12630600  | 0.67345900  |
| H | -1.20619200 | -2.42199200 | 1.88005600  | H  | -3.27542600 | 2.17938300  | 3.15476200  |
| C | -2.61722100 | -4.74269400 | 2.00483200  | H  | -3.89945600 | 5.73955000  | 2.94191700  |
| H | -2.56587500 | -4.68476200 | 3.10008600  | H  | -6.11929300 | 6.78476300  | 2.61004700  |
| H | -3.01384300 | -5.72983200 | 1.74560300  | H  | -8.05888900 | 5.39567200  | 1.89952300  |

|   |             |            |             |
|---|-------------|------------|-------------|
| H | -7.75006900 | 2.95454900 | 1.52561900  |
| H | -5.52915000 | 1.91666800 | 1.85436600  |
| O | -0.23863300 | 3.23336300 | 1.87002800  |
| O | -0.97860100 | 1.05533800 | 1.93469200  |
| H | -2.54894700 | 3.78430600 | 3.19887800  |
| H | -0.69965100 | 2.13235200 | -0.06021100 |
| H | 0.66053600  | 2.84929500 | 1.86280700  |

**TS2a**

|   |             |             |            |
|---|-------------|-------------|------------|
| C | 0.75780600  | -0.95678700 | 2.88594200 |
| C | 1.88809700  | -0.12861200 | 2.91371800 |
| H | 2.27306100  | 0.28082900  | 1.98598800 |
| C | 2.54105500  | 0.15764800  | 4.12000100 |
| C | 2.03907600  | -0.39113100 | 5.30398000 |
| H | 2.54276600  | -0.17468300 | 6.24510300 |
| C | 0.90951700  | -1.21810800 | 5.30867800 |
| C | 0.28271900  | -1.49989600 | 4.08991000 |
| H | -0.57929600 | -2.15871500 | 4.08493000 |
| C | 3.75550200  | 1.05797200  | 4.13886900 |
| H | 3.46636300  | 2.11690700  | 4.10863800 |
| H | 4.40102200  | 0.87372000  | 3.27278200 |
| H | 4.35267600  | 0.90847100  | 5.04480300 |
| C | 0.37221000  | -1.78456900 | 6.60399100 |
| H | -0.25728900 | -2.66282500 | 6.42637000 |
| H | -0.24052100 | -1.04607800 | 7.13860600 |
| H | 1.18231600  | -2.08014400 | 7.28059700 |
| C | -1.59797900 | -2.15162600 | 1.72882700 |
| C | -1.90780400 | -3.48631600 | 1.44451300 |
| H | -1.19373500 | -4.10611600 | 0.91196900 |
| C | -3.12919300 | -4.04678800 | 1.84110100 |
| C | -4.03458900 | -3.25057200 | 2.54972000 |
| H | -4.97743500 | -3.68303900 | 2.88126900 |
| C | -3.75651000 | -1.91039600 | 2.84633900 |
| C | -2.53802100 | -1.37248400 | 2.41962400 |
| H | -2.31151500 | -0.33542200 | 2.64850700 |
| C | -3.46241300 | -5.47823900 | 1.48790900 |
| H | -4.23898300 | -5.88506000 | 2.14440700 |
| H | -2.58165200 | -6.12581500 | 1.56238500 |
| H | -3.83133200 | -5.55042200 | 0.45604300 |
| C | -4.73894000 | -1.06324800 | 3.62398200 |
| H | -5.71229800 | -1.55729400 | 3.71104800 |
| H | -4.89466000 | -0.09140600 | 3.14116100 |
| H | -4.37818600 | -0.86533100 | 4.64206300 |
| C | 1.03318700  | -2.82175500 | 0.70680900 |

|   |             |             |             |
|---|-------------|-------------|-------------|
| C | 1.92188500  | -3.46743000 | 1.57889100  |
| H | 2.02462800  | -3.11909100 | 2.60119300  |
| C | 2.68958700  | -4.55890100 | 1.15568700  |
| C | 2.54675600  | -5.00750200 | -0.16274700 |
| H | 3.13506500  | -5.85959400 | -0.50071600 |
| C | 1.66557600  | -4.38890100 | -1.05703900 |
| C | 0.91841300  | -3.29037600 | -0.61036800 |
| H | 0.25233600  | -2.78329100 | -1.29891300 |
| C | 3.67125500  | -5.22166400 | 2.09603400  |
| H | 4.67393800  | -4.78489900 | 1.99623400  |
| H | 3.76293000  | -6.29400300 | 1.89044400  |
| H | 3.36760800  | -5.10075100 | 3.14112500  |
| C | 1.51140800  | -4.90544000 | -2.47023700 |
| H | 0.69551400  | -5.63734700 | -2.54189500 |
| H | 2.42351100  | -5.40299100 | -2.81702800 |
| C | -2.17845100 | 1.63570100  | -2.63118100 |
| C | -1.54445100 | 2.87328500  | -2.81939700 |
| H | -0.98079700 | 3.32251900  | -2.00907400 |
| C | -1.63751100 | 3.56150900  | -4.03304600 |
| C | -2.38188300 | 2.99254600  | -5.07362500 |
| H | -2.46344600 | 3.52222900  | -6.02184600 |
| C | -3.02615100 | 1.76256000  | -4.92012700 |
| C | -2.92311400 | 1.09743500  | -3.68990500 |
| H | -3.43583900 | 0.14951300  | -3.57082500 |
| C | -0.92903300 | 4.88394100  | -4.22288100 |
| H | -0.73427900 | 5.37321700  | -3.26307600 |
| H | -1.51748800 | 5.57001500  | -4.84284700 |
| H | 0.03950900  | 4.74637600  | -4.72214400 |
| C | -3.80295400 | 1.14639100  | -6.06221800 |
| H | -3.15176900 | 0.53578000  | -6.70229200 |
| H | -4.25587500 | 1.91360600  | -6.69996100 |
| H | -4.60270200 | 0.49283800  | -5.69742200 |
| C | -3.32416600 | 1.80007700  | -0.00805500 |
| C | -4.49698400 | 2.28425600  | -0.61304400 |
| H | -4.68399800 | 2.08133000  | -1.66365400 |
| C | -5.42731300 | 3.03506800  | 0.11008100  |
| C | -5.16181100 | 3.31403200  | 1.45973100  |
| H | -5.87375500 | 3.91198400  | 2.02686600  |
| C | -4.00130600 | 2.85935100  | 2.08961000  |
| C | -3.08632100 | 2.09833600  | 1.34049500  |
| H | -2.16057000 | 1.76670000  | 1.80027500  |
| C | -6.69176800 | 3.54636200  | -0.54262100 |
| H | -6.70594900 | 3.32341800  | -1.61386100 |
| H | -6.79165600 | 4.63217700  | -0.42416600 |

|    |             |             |             |
|----|-------------|-------------|-------------|
| H  | -7.58450300 | 3.09117600  | -0.09466300 |
| C  | -3.73013900 | 3.16347300  | 3.54605800  |
| H  | -2.66204200 | 3.32486300  | 3.72700700  |
| H  | -4.04339800 | 2.33116500  | 4.19034400  |
| H  | -4.27254500 | 4.05522100  | 3.87731500  |
| C  | -2.92546800 | -0.79456100 | -1.29813000 |
| C  | -4.20079900 | -1.10223100 | -0.81906200 |
| H  | -4.72418600 | -0.40122000 | -0.17689100 |
| C  | -4.83359200 | -2.30601100 | -1.16679000 |
| C  | -4.16656300 | -3.19043200 | -2.01638400 |
| H  | -4.65931900 | -4.11532500 | -2.31323100 |
| C  | -2.88229400 | -2.91251700 | -2.50812300 |
| C  | -2.26808500 | -1.71418300 | -2.13542400 |
| H  | -1.28142300 | -1.47353100 | -2.52348000 |
| C  | -2.18354100 | -3.89472900 | -3.42060400 |
| H  | -1.37170800 | -3.41554100 | -3.97699200 |
| H  | -2.87919900 | -4.33222900 | -4.14611300 |
| H  | -1.74626500 | -4.72562600 | -2.85129700 |
| C  | -6.20817500 | -2.62818700 | -0.62754400 |
| H  | -6.87429900 | -1.75901200 | -0.67926900 |
| H  | -6.15298100 | -2.93126300 | 0.42583800  |
| H  | -6.67642400 | -3.44614400 | -1.18520400 |
| Ru | 0.11298200  | 0.63070900  | -0.19483800 |
| P  | 0.00790700  | -1.36192100 | 1.23522000  |
| P  | -2.06476400 | 0.80866700  | -0.95659500 |
| H  | 1.28087500  | -4.09463500 | -3.16914300 |
| H  | 0.41097300  | 2.15458700  | -0.89831400 |
| C  | 2.14240100  | -0.31022500 | -1.44919500 |
| C  | 3.30113300  | -0.82549000 | -2.27644200 |
| C  | 4.51206100  | -1.25955800 | -1.42680300 |
| C  | 5.66035700  | -1.76258000 | -2.27539500 |
| C  | 5.81147300  | -3.13051400 | -2.54138400 |
| C  | 6.85018000  | -3.59562700 | -3.35006600 |
| C  | 7.75982400  | -2.69585700 | -3.90887500 |
| C  | 7.62331200  | -1.33010300 | -3.65013000 |
| C  | 6.58359300  | -0.87089400 | -2.84036100 |
| H  | 2.93937200  | -1.65014300 | -2.89874300 |
| H  | 3.60042500  | -0.02437800 | -2.96734000 |
| H  | 4.83112300  | -0.40755800 | -0.81740600 |
| H  | 5.10866700  | -3.83572200 | -2.10221000 |
| H  | 6.95160900  | -4.66134800 | -3.54022100 |
| H  | 8.57093700  | -3.05561600 | -4.53655500 |
| H  | 8.33024200  | -0.62181400 | -4.07503600 |
| H  | 6.48796600  | 0.19415200  | -2.63803600 |

|   |             |             |             |
|---|-------------|-------------|-------------|
| O | 0.94735200  | -0.44762700 | -1.87735900 |
| O | 2.33948600  | 0.27722400  | -0.33818700 |
| H | 4.19158500  | -2.04230400 | -0.72983000 |
| C | 0.38516700  | 2.97357900  | 0.48081800  |
| C | 1.79639800  | 3.53238300  | 0.35141100  |
| C | 2.15094900  | 4.41336700  | 1.57310700  |
| C | 3.52628700  | 5.03350500  | 1.44910200  |
| C | 4.68211300  | 4.27314100  | 1.68159400  |
| C | 5.95144900  | 4.83599700  | 1.54577000  |
| C | 6.08924100  | 6.17525200  | 1.17294900  |
| C | 4.94800700  | 6.94356000  | 0.93768600  |
| C | 3.67984800  | 6.37516500  | 1.07474000  |
| H | -1.40537600 | 3.61488400  | 0.51449200  |
| H | 2.48989500  | 2.69327400  | 0.26643700  |
| H | 1.86305600  | 4.12388000  | -0.56745200 |
| H | 1.39709500  | 5.20191300  | 1.67602100  |
| H | 4.58428500  | 3.23035600  | 1.97485400  |
| H | 6.83372800  | 4.22954100  | 1.73482000  |
| H | 7.07735700  | 6.61589300  | 1.06934500  |
| H | 5.04318200  | 7.98764000  | 0.64995500  |
| H | 2.79482000  | 6.98133700  | 0.89279100  |
| O | 0.08737500  | 2.11565300  | 1.39357700  |
| O | -0.54732200 | 3.94150000  | 0.18088800  |
| H | 2.09165600  | 3.79114200  | 2.47438600  |

**Int3**

|   |             |             |             |
|---|-------------|-------------|-------------|
| C | -1.04346400 | -0.51810800 | -3.15597400 |
| C | -1.59616300 | 0.75758900  | -3.35315500 |
| H | -2.03682700 | 1.28171800  | -2.50935800 |
| C | -1.60464100 | 1.35329900  | -4.62072700 |
| C | -1.03965000 | 0.65019700  | -5.69012900 |
| H | -1.03706100 | 1.10438700  | -6.67975600 |
| C | -0.48182800 | -0.62367700 | -5.52370600 |
| C | -0.49140300 | -1.20057200 | -4.24866200 |
| H | -0.06618000 | -2.18981400 | -4.11436300 |
| C | -2.23616700 | 2.71105700  | -4.82886700 |
| H | -2.05271100 | 3.37301000  | -3.97594200 |
| H | -3.32501900 | 2.62818600  | -4.94528500 |
| H | -1.84705200 | 3.19930800  | -5.72847900 |
| C | 0.13980600  | -1.35117600 | -6.69459500 |
| H | -0.41635800 | -1.17010600 | -7.62120200 |
| H | 0.17068300  | -2.43224000 | -6.52328800 |
| H | 1.17216400  | -1.01801800 | -6.86620900 |
| C | -0.41228100 | -2.89153500 | -1.55292100 |

|   |             |             |             |    |             |             |             |
|---|-------------|-------------|-------------|----|-------------|-------------|-------------|
| C | -1.18472000 | -4.02927900 | -1.30970000 | H  | -1.89272700 | 4.09484300  | 4.31117400  |
| H | -2.22681800 | -3.92960900 | -1.02576400 | C  | -0.65863000 | -0.44004000 | 6.81567200  |
| C | -0.63164500 | -5.31577800 | -1.41584600 | H  | -0.21546800 | 0.11860400  | 7.64842400  |
| C | 0.71039400  | -5.44013400 | -1.77732800 | H  | -0.18953400 | -1.42890500 | 6.78505500  |
| H | 1.14378000  | -6.43458400 | -1.87557700 | H  | -1.71992300 | -0.58734800 | 7.05673300  |
| C | 1.51647900  | -4.31556900 | -2.01452700 | C  | 2.46700100  | -0.77632400 | 1.99821000  |
| C | 0.94795700  | -3.04638300 | -1.88689400 | C  | 3.05139000  | -0.11274700 | 3.08482000  |
| H | 1.56651500  | -2.16719100 | -2.04533100 | H  | 2.43684400  | 0.48620700  | 3.74801100  |
| C | -1.48229000 | -6.53249300 | -1.13115000 | C  | 4.42783300  | -0.20099300 | 3.33321500  |
| H | -0.94971100 | -7.45887100 | -1.36958400 | C  | 5.21423700  | -0.97857000 | 2.47845500  |
| H | -2.41128300 | -6.51922200 | -1.71391100 | H  | 6.28403800  | -1.05742700 | 2.66505900  |
| H | -1.76701600 | -6.57194400 | -0.07211700 | C  | 4.66106700  | -1.65395600 | 1.38267700  |
| C | 2.96750100  | -4.48135300 | -2.40766900 | C  | 3.28735800  | -1.53376500 | 1.14595300  |
| H | 3.46745600  | -3.51215500 | -2.49859100 | H  | 2.85746500  | -2.02302300 | 0.27871300  |
| H | 3.06352500  | -4.99794400 | -3.37137700 | C  | 5.04505700  | 0.55260100  | 4.48998200  |
| H | 3.51823800  | -5.07764400 | -1.66952700 | H  | 4.39753900  | 0.52982800  | 5.37352200  |
| C | -2.86612300 | -1.29804200 | -1.09312100 | H  | 5.20572200  | 1.60883700  | 4.23608000  |
| C | -3.70262300 | -2.04071300 | -1.94539800 | H  | 6.01633900  | 0.13134000  | 4.76995300  |
| H | -3.28064000 | -2.55720300 | -2.80387200 | C  | 5.52497000  | -2.50822500 | 0.48207900  |
| C | -5.07662300 | -2.12315500 | -1.71123800 | H  | 5.51676600  | -3.55972300 | 0.80000600  |
| C | -5.60839100 | -1.43342900 | -0.61018700 | H  | 6.56803200  | -2.17445200 | 0.49326600  |
| H | -6.67873600 | -1.49212900 | -0.41728700 | H  | 5.17015600  | -2.47881700 | -0.55362600 |
| C | -4.80798700 | -0.65813800 | 0.23245500  | C  | -0.02364800 | -2.31957200 | 1.93921900  |
| C | -3.42736300 | -0.59306900 | -0.02396100 | C  | 0.77781500  | -3.46188100 | 2.04110900  |
| H | -2.79222700 | 0.05158100  | 0.57552900  | H  | 1.85343100  | -3.38509600 | 1.93145400  |
| C | -5.97457700 | -2.94147800 | -2.61179600 | C  | 0.21671200  | -4.71864900 | 2.30577500  |
| H | -5.43917200 | -3.28637400 | -3.50212900 | C  | -1.16629500 | -4.81184600 | 2.48632400  |
| H | -6.84288700 | -2.36110100 | -2.94599000 | H  | -1.60920100 | -5.78116900 | 2.71013300  |
| H | -6.36184500 | -3.82823500 | -2.09296900 | C  | -1.99546300 | -3.68623200 | 2.40055100  |
| C | -5.41117700 | 0.11770600  | 1.38250700  | C  | -1.40933900 | -2.44783600 | 2.12144300  |
| H | -4.77404400 | 0.07457800  | 2.27269300  | H  | -2.04192400 | -1.56815400 | 2.07060500  |
| H | -6.39909600 | -0.27083700 | 1.65189900  | C  | -3.48504900 | -3.79428600 | 2.63740900  |
| C | 0.01837700  | 0.28420700  | 3.11692000  | H  | -3.75446900 | -3.43323700 | 3.63889700  |
| C | -0.22003800 | 1.66143200  | 3.06323600  | H  | -3.82725400 | -4.83173900 | 2.56065000  |
| H | -0.14780200 | 2.19326700  | 2.12328100  | H  | -4.04864200 | -3.19411200 | 1.91476000  |
| C | -0.58362600 | 2.37054000  | 4.21770000  | C  | 1.09683400  | -5.94551100 | 2.37618100  |
| C | -0.71301600 | 1.67442900  | 5.42312400  | H  | 1.34794300  | -6.30445900 | 1.36936100  |
| H | -0.99343800 | 2.21852700  | 6.32456800  | H  | 0.60135700  | -6.76613200 | 2.90568100  |
| C | -0.48888700 | 0.29362400  | 5.50383200  | H  | 2.04155400  | -5.73274200 | 2.88918700  |
| C | -0.11669900 | -0.39081200 | 4.34288900  | Ru | 0.33321900  | 0.36315700  | -0.40636900 |
| H | 0.07570600  | -1.45769900 | 4.40257000  | P  | -1.05091300 | -1.16322900 | -1.41493000 |
| C | -0.83257600 | 3.86080000  | 4.14731700  | P  | 0.65231100  | -0.61589300 | 1.62734600  |
| H | -0.54984800 | 4.25556200  | 3.16762400  | H  | -5.53309000 | 1.17863700  | 1.12957000  |
| H | -0.26313300 | 4.39782000  | 4.91623800  | C  | 2.78754900  | 1.04561500  | -0.88521300 |



|             |             |             |             |   |             |             |            |
|-------------|-------------|-------------|-------------|---|-------------|-------------|------------|
| C           | 4.21140400  | 1.45226900  | -1.19872800 | C | 2.30618400  | 1.12297800  | 2.21903700 |
| C           | 4.40567600  | 2.97236300  | -1.36689100 | H | 2.56110300  | 1.03887000  | 1.16861200 |
| C           | 5.85387600  | 3.34334700  | -1.60661400 | C | 3.11955400  | 1.88819200  | 3.06430700 |
| C           | 6.71125300  | 3.61497600  | -0.53113200 | C | 2.78753600  | 1.97270200  | 4.42109600 |
| C           | 8.05507300  | 3.92629700  | -0.74386800 | H | 3.41736400  | 2.56136400  | 5.08679400 |
| C           | 8.56658200  | 3.97239400  | -2.04246300 | C | 1.67014400  | 1.31426800  | 4.94472900 |
| C           | 7.72377900  | 3.70622700  | -3.12343500 | C | 0.87564400  | 0.55046600  | 4.08074100 |
| C           | 6.38070000  | 3.39501200  | -2.90458900 | H | 0.01789500  | 0.02678500  | 4.48886400 |
| H           | 4.83437400  | 1.08869100  | -0.36914400 | C | 4.32039300  | 2.62490400  | 2.51413200 |
| H           | 4.53699900  | 0.90897500  | -2.09183000 | H | 4.04990300  | 3.63570600  | 2.18056900 |
| H           | 3.78730700  | 3.32098400  | -2.20339700 | H | 4.74591200  | 2.10419900  | 1.65000200 |
| H           | 6.31739300  | 3.58837900  | 0.48290700  | H | 5.10655700  | 2.73135800  | 3.26996500 |
| H           | 8.70104300  | 4.13932900  | 0.10420900  | C | 1.31371400  | 1.43803400  | 6.40935500 |
| H           | 9.61155900  | 4.21906800  | -2.21089600 | H | 0.76059900  | 0.56134000  | 6.76311600 |
| H           | 8.11049400  | 3.74592200  | -4.13869600 | H | 0.68066800  | 2.31693400  | 6.59227100 |
| H           | 5.72863300  | 3.19531800  | -3.75264000 | H | 2.20827700  | 1.54883100  | 7.03230600 |
| O           | 2.35110300  | -0.08827500 | -1.26409500 | C | -1.31946100 | -0.94673500 | 2.60964700 |
| O           | 2.02633400  | 1.81689300  | -0.20906000 | C | -1.49499900 | -2.17220300 | 3.26920400 |
| H           | 4.02882300  | 3.47354000  | -0.46967500 | H | -0.78417600 | -2.97676600 | 3.11425300 |
| C           | -0.97898900 | 2.87638700  | -0.40090300 | C | -2.56834200 | -2.37326600 | 4.14394900 |
| C           | -2.27480300 | 3.68942600  | -0.55890900 | C | -3.46981800 | -1.32020500 | 4.34989800 |
| C           | -3.08480600 | 3.82477800  | 0.74234100  | H | -4.30171100 | -1.46040500 | 5.03854600 |
| C           | -4.40097600 | 4.54640200  | 0.54172300  | C | -3.32043200 | -0.08588700 | 3.70852200 |
| C           | -4.60270300 | 5.84219400  | 1.03520400  | C | -2.23634300 | 0.08769100  | 2.83596700 |
| C           | -5.81404500 | 6.51008300  | 0.83971800  | H | -2.09583700 | 1.04647100  | 2.34585700 |
| C           | -6.85223700 | 5.89088400  | 0.14233800  | C | -2.75204500 | -3.69514200 | 4.85551400 |
| C           | -6.66689000 | 4.59991500  | -0.35896900 | H | -3.01715900 | -3.54853600 | 5.90908500 |
| C           | -5.45438500 | 3.93871800  | -0.16090200 | H | -1.83922800 | -4.29798100 | 4.81736200 |
| H           | -2.01579000 | 4.68374800  | -0.94326800 | H | -3.55631800 | -4.28748600 | 4.39995000 |
| H           | -2.89215900 | 3.19635400  | -1.32006000 | C | -4.29333000 | 1.04352600  | 3.95973200 |
| H           | -3.26156100 | 2.81879900  | 1.13930200  | H | -5.03793500 | 0.76670100  | 4.71320900 |
| H           | -3.79913500 | 6.33186400  | 1.58113100  | H | -4.82422900 | 1.32211600  | 3.04225700 |
| H           | -5.94600200 | 7.51472700  | 1.23427700  | H | -3.77472900 | 1.94241000  | 4.31519500 |
| H           | -7.79639400 | 6.40769900  | -0.00930100 | C | 1.06122100  | -2.21376000 | 1.54537400 |
| H           | -7.46863100 | 4.10687600  | -0.90366700 | C | 2.18187800  | -2.45539700 | 2.35306600 |
| H           | -5.31778400 | 2.93569100  | -0.56084600 | H | 2.54904100  | -1.67824900 | 3.01570000 |
| O           | -0.10013100 | 3.63884200  | 0.44095200  | C | 2.83841900  | -3.69278600 | 2.32670000 |
| O           | -1.25446200 | 1.60882700  | 0.07452200  | C | 2.34316200  | -4.69412700 | 1.48274400 |
| H           | -2.48026000 | 4.35571000  | 1.48446700  | H | 2.83518400  | -5.66585500 | 1.46654400 |
| H           | -0.49665000 | 2.82845400  | -1.40485200 | C | 1.22823800  | -4.48103100 | 0.66296800 |
| H           | 0.78146400  | 3.23407400  | 0.34700600  | C | 0.59795600  | -3.23149200 | 0.69922000 |
|             |             |             |             | H | -0.25922200 | -3.05396000 | 0.05726600 |
|             |             |             |             | C | 4.06106100  | -3.93860800 | 3.18271000 |
|             |             |             |             | H | 4.98464400  | -3.83515300 | 2.59775700 |
| <b>Int4</b> |             |             |             |   |             |             |            |
| C           | 1.17864200  | 0.45137500  | 2.71467900  |   |             |             |            |

|   |             |             |             |    |             |             |             |
|---|-------------|-------------|-------------|----|-------------|-------------|-------------|
| H | 4.05853900  | -4.95007300 | 3.60505800  | H  | -3.70019900 | -5.54304900 | -0.87616800 |
| H | 4.11888000  | -3.22567500 | 4.01152300  | C  | -2.70329600 | -4.04676200 | -2.05577800 |
| C | 0.72810600  | -5.56593100 | -0.26403400 | C  | -2.33825900 | -2.69410600 | -2.12138500 |
| H | -0.35794400 | -5.50992700 | -0.39157500 | H  | -1.81993600 | -2.33737700 | -3.00470400 |
| H | 0.97970500  | -6.56354900 | 0.11258600  | C  | -2.34959300 | -4.98603000 | -3.18700700 |
| C | -2.20400000 | 0.35005400  | -2.98539400 | H  | -1.27537700 | -5.21176300 | -3.19536800 |
| C | -1.12757800 | -0.03307900 | -3.80225300 | H  | -2.59289200 | -4.54709500 | -4.16151700 |
| H | -0.26280000 | -0.51893100 | -3.36002800 | H  | -2.88651300 | -5.93644300 | -3.10124400 |
| C | -1.14470000 | 0.20779900  | -5.18029400 | C  | -4.50000000 | -4.14606300 | 1.31769900  |
| C | -2.25750200 | 0.84920100  | -5.73598600 | H  | -5.52478800 | -4.41891000 | 1.03306600  |
| H | -2.28234800 | 1.03704300  | -6.80851800 | H  | -4.56083700 | -3.38965100 | 2.10525000  |
| C | -3.33554800 | 1.26044800  | -4.94620200 | H  | -4.03719100 | -5.04398000 | 1.74549800  |
| C | -3.29828700 | 1.00095500  | -3.57005800 | Ru | 0.04024700  | 0.44433900  | -0.51563600 |
| H | -4.13755100 | 1.31316000  | -2.95813100 | P  | 0.16259800  | -0.59163100 | 1.55533500  |
| C | 0.03274100  | -0.18708500 | -6.04312800 | P  | -2.11236400 | -0.02791100 | -1.16287700 |
| H | 0.76203300  | 0.63115100  | -6.11259100 | H  | 1.17705500  | -5.47027300 | -1.26190700 |
| H | -0.28026500 | -0.43136900 | -7.06436800 | H  | -1.16769900 | 3.21333900  | -1.51046500 |
| H | 0.55800900  | -1.05505900 | -5.63071900 | C  | 2.20535400  | -0.71080900 | -1.44603100 |
| C | -4.50962600 | 1.99089000  | -5.55884400 | C  | 3.38734100  | -1.46298700 | -2.02448500 |
| H | -4.68957600 | 1.66731300  | -6.59003900 | C  | 4.57134800  | -1.54030300 | -1.03459900 |
| H | -4.33403800 | 3.07485300  | -5.58492900 | C  | 5.72501400  | -2.35545600 | -1.57738500 |
| H | -5.42851300 | 1.82532800  | -4.98622500 | C  | 5.77447300  | -3.74282600 | -1.37937200 |
| C | -3.57315900 | 0.88782200  | -0.48745600 | C  | 6.81853300  | -4.50623600 | -1.90385400 |
| C | -4.89418800 | 0.43896700  | -0.66215100 | C  | 7.83551100  | -3.89231700 | -2.63830500 |
| H | -5.08295900 | -0.51699900 | -1.14175700 | C  | 7.79997000  | -2.51127600 | -2.84140500 |
| C | -5.97801800 | 1.20599400  | -0.22637900 | C  | 6.75350400  | -1.75230000 | -2.31436200 |
| C | -5.71953600 | 2.44436600  | 0.38164700  | H  | 3.05403000  | -2.46438200 | -2.31171600 |
| H | -6.55774400 | 3.05313800  | 0.71848600  | H  | 3.71196500  | -0.95023100 | -2.94044900 |
| C | -4.41728600 | 2.91532800  | 0.56807800  | H  | 4.89668100  | -0.52110000 | -0.80194200 |
| C | -3.34356000 | 2.11946500  | 0.13588800  | H  | 4.98619100  | -4.22466500 | -0.80397800 |
| H | -2.31614000 | 2.44456700  | 0.29837500  | H  | 6.84057400  | -5.58011000 | -1.73542100 |
| C | -7.39910000 | 0.71862900  | -0.40030800 | H  | 8.65114200  | -4.48443700 | -3.04496400 |
| H | -7.43290700 | -0.22347500 | -0.95659500 | H  | 8.59018300  | -2.02303000 | -3.40627000 |
| H | -8.01078400 | 1.45063500  | -0.94207700 | H  | 6.73580200  | -0.67556900 | -2.47108300 |
| H | -7.88561500 | 0.54984400  | 0.56899000  | O  | 1.03663400  | -1.20866600 | -1.54273500 |
| C | -4.15878000 | 4.26271900  | 1.20427000  | O  | 2.37663600  | 0.40563800  | -0.85626500 |
| H | -5.03132900 | 4.61895900  | 1.76212900  | H  | 4.21444200  | -1.98123300 | -0.09615400 |
| H | -3.92265200 | 5.01928100  | 0.44433300  | C  | -0.17674500 | 3.05429600  | -1.04600800 |
| H | -3.30543400 | 4.22328200  | 1.89009100  | C  | 0.57896000  | 4.38663300  | -1.00018000 |
| C | -2.64586400 | -1.80719300 | -1.08311800 | C  | 1.99333500  | 4.28657400  | -0.39601100 |
| C | -3.32834500 | -2.29716800 | 0.04452900  | C  | 2.65319000  | 5.63840200  | -0.22878000 |
| H | -3.57737500 | -1.62720200 | 0.86082600  | C  | 2.45693100  | 6.38926500  | 0.93988700  |
| C | -3.71875200 | -3.63680400 | 0.12776500  | C  | 3.03622700  | 7.65040800  | 1.09047200  |
| C | -3.39539800 | -4.49884300 | -0.92977200 | C  | 3.82645000  | 8.18567100  | 0.07106400  |

|              |             |             |             |   |             |             |             |
|--------------|-------------|-------------|-------------|---|-------------|-------------|-------------|
| C            | 4.03232700  | 7.44890700  | -1.09713200 | H | 0.42838700  | -7.16274400 | -2.65874400 |
| C            | 3.45060300  | 6.18827800  | -1.24235600 | H | -0.71397900 | -6.83073100 | -1.34410000 |
| H            | 0.61671500  | 4.81218900  | -2.01168300 | C | 1.91427800  | -2.75533400 | -4.68803600 |
| H            | -0.02109700 | 5.07247900  | -0.38855900 | H | 1.87400300  | -3.46687700 | -5.52037500 |
| H            | 1.91065300  | 3.77936100  | 0.57025100  | H | 2.97228400  | -2.63046300 | -4.41956500 |
| H            | 1.84399700  | 5.97664300  | 1.73874200  | H | 1.55346600  | -1.78792700 | -5.05270700 |
| H            | 2.87378000  | 8.21336800  | 2.00636300  | C | -2.43770700 | -2.40487900 | 0.43462200  |
| H            | 4.28082900  | 9.16614300  | 0.18750700  | C | -3.82316700 | -2.31776700 | 0.26851700  |
| H            | 4.64973900  | 7.85397000  | -1.89515300 | H | -4.23519000 | -1.73454800 | -0.54819100 |
| H            | 3.61957000  | 5.61864200  | -2.15414500 | C | -4.70124200 | -2.97428100 | 1.14555600  |
| O            | 0.44031300  | 2.11651800  | -2.03887900 | C | -4.16478200 | -3.72584400 | 2.19166700  |
| O            | -0.23607500 | 2.41430800  | 0.15248200  | H | -4.83733200 | -4.24229500 | 2.87454900  |
| H            | 2.62988100  | 3.65434800  | -1.03047400 | C | -2.78020100 | -3.82506200 | 2.39221300  |
| H            | 1.40043000  | 2.07170000  | -1.85802700 | C | -1.93029800 | -3.15622700 | 1.50926400  |
| <b>Int1'</b> |             |             |             | H | -0.85649200 | -3.21835900 | 1.66445600  |
| C            | -2.32720200 | -0.84119000 | -2.02971000 | C | -6.19642200 | -2.85434900 | 0.95460300  |
| C            | -2.51404600 | 0.52690900  | -2.23949100 | H | -6.54138700 | -1.83091700 | 1.14986200  |
| H            | -2.04429500 | 1.24049400  | -1.57640100 | H | -6.74066200 | -3.52233900 | 1.62988700  |
| C            | -3.30503300 | 0.98627800  | -3.30704900 | H | -6.49053400 | -3.09978600 | -0.07288400 |
| C            | -3.90531300 | 0.05261500  | -4.15134400 | C | -2.22853900 | -4.60981800 | 3.56068700  |
| H            | -4.51606000 | 0.40276900  | -4.98248500 | H | -1.17437600 | -4.86566800 | 3.41169200  |
| C            | -3.73764300 | -1.32869300 | -3.96247900 | H | -2.78424700 | -5.54150600 | 3.71749200  |
| C            | -2.94068500 | -1.76073800 | -2.90281100 | C | 2.77450700  | -0.19624400 | 2.39689100  |
| H            | -2.78935800 | -2.82702000 | -2.75837900 | C | 2.09960300  | 0.68062000  | 3.25165400  |
| C            | -3.50181100 | 2.47077400  | -3.51630200 | H | 1.21095500  | 1.19533300  | 2.90699400  |
| H            | -3.94372500 | 2.68386900  | -4.49533000 | C | 2.56239900  | 0.91777500  | 4.55622100  |
| H            | -2.55125300 | 3.01145800  | -3.44543500 | C | 3.71620200  | 0.26219800  | 4.98755200  |
| H            | -4.16876900 | 2.89398300  | -2.75346300 | H | 4.07904100  | 0.43619900  | 5.99962700  |
| C            | -4.40454700 | -2.31696900 | -4.89280200 | C | 4.41956500  | -0.61936700 | 4.15218800  |
| H            | -4.11296700 | -3.34566100 | -4.65817800 | C | 3.93636300  | -0.84173600 | 2.86141500  |
| H            | -4.13886700 | -2.12409600 | -5.93963300 | H | 4.46698800  | -1.53418100 | 2.21430100  |
| H            | -5.49842100 | -2.25685900 | -4.82387000 | C | 1.81674400  | 1.87590100  | 5.45680900  |
| C            | -0.32955700 | -2.77361500 | -1.58561900 | H | 2.16903500  | 1.81119600  | 6.49159200  |
| C            | -0.38679500 | -4.14135400 | -1.30619400 | H | 0.74011300  | 1.67194900  | 5.44708000  |
| H            | -0.98199600 | -4.50278600 | -0.47384200 | H | 1.94807900  | 2.91354800  | 5.12380700  |
| C            | 0.29744100  | -5.07032700 | -2.10526500 | C | 5.66254200  | -1.32186800 | 4.65093000  |
| C            | 1.02681200  | -4.60439800 | -3.20164100 | H | 6.41143400  | -0.60528200 | 5.01059700  |
| H            | 1.53946500  | -5.32109100 | -3.84168000 | H | 6.12569000  | -1.92247400 | 3.86157400  |
| C            | 1.10385700  | -3.23817100 | -3.50655900 | H | 5.43370700  | -1.99319100 | 5.48858600  |
| C            | 0.42202300  | -2.33566500 | -2.68787600 | C | 3.32111600  | 0.41345300  | -0.41066700 |
| H            | 0.44230100  | -1.27659300 | -2.93337500 | C | 4.46234200  | 1.06163700  | 0.08775800  |
| C            | 0.25270000  | -6.54374200 | -1.77236100 | H | 4.68798900  | 1.02043200  | 1.14795400  |
| H            | 1.02533700  | -6.80004400 | -1.03504500 | C | 5.31781100  | 1.77284000  | -0.76043100 |
|              |             |             |             | C | 5.01867600  | 1.82061600  | -2.12926800 |

|    |             |             |             |             |             |             |             |
|----|-------------|-------------|-------------|-------------|-------------|-------------|-------------|
| H  | 5.68144300  | 2.36698500  | -2.79888100 | H           | 1.21860900  | 3.82352600  | -1.82869100 |
| C  | 3.88844000  | 1.18902000  | -2.65606600 | H           | 0.06156400  | 4.53640500  | -0.71012200 |
| C  | 3.04139200  | 0.49498300  | -1.78074800 | H           | 1.80134200  | 4.68455600  | 1.06658400  |
| H  | 2.14408000  | 0.02972900  | -2.17402600 | H           | 3.91141900  | 5.11769800  | -1.95408100 |
| C  | 6.52992900  | 2.49303900  | -0.21322900 | H           | 4.51095100  | 7.31190400  | -2.93829000 |
| H  | 6.37455400  | 3.57971600  | -0.19979000 | H           | 3.43456800  | 9.39232000  | -2.09727700 |
| H  | 7.41994600  | 2.30231600  | -0.82453800 | H           | 1.75946200  | 9.25400300  | -0.26196000 |
| H  | 6.75058700  | 2.18047100  | 0.81217900  | H           | 1.16812100  | 7.05897800  | 0.71792300  |
| C  | 3.57199400  | 1.25254000  | -4.13337900 | O           | 0.69122800  | 2.26312400  | 0.99059000  |
| H  | 3.67613000  | 0.26848000  | -4.60867900 | O           | 0.24755100  | 1.62501800  | -1.06186000 |
| H  | 4.23993600  | 1.94439400  | -4.65652600 | H           | 2.97819700  | 3.91475600  | 0.01342000  |
| H  | 2.54090600  | 1.58418400  | -4.30372200 | C           | -2.51704300 | 1.29325400  | 1.87581600  |
| C  | 2.62319200  | -2.28267500 | 0.47388100  | C           | -3.78192500 | 2.14461900  | 1.97985900  |
| C  | 3.49091800  | -2.72938000 | -0.52584500 | C           | -4.93246200 | 1.58748600  | 1.11109500  |
| H  | 3.90479000  | -2.02302200 | -1.23869800 | C           | -6.17834100 | 2.44411200  | 1.17561500  |
| C  | 3.85966400  | -4.08043800 | -0.61252700 | C           | -7.14831200 | 2.23549800  | 2.16639500  |
| C  | 3.35368100  | -4.97594700 | 0.33258300  | C           | -8.28131900 | 3.04679100  | 2.24697100  |
| H  | 3.65399400  | -6.02177400 | 0.28776600  | C           | -8.46573400 | 4.08640200  | 1.33302800  |
| C  | 2.47927200  | -4.55897000 | 1.34591600  | C           | -7.50894000 | 4.30574900  | 0.33983500  |
| C  | 2.12117600  | -3.21005900 | 1.40174800  | C           | -6.37820900 | 3.49099600  | 0.26466300  |
| H  | 1.47355400  | -2.86999100 | 2.20656400  | H           | -4.08347500 | 2.19445700  | 3.02980100  |
| C  | 1.93207700  | -5.54986200 | 2.34847800  | H           | -3.54304000 | 3.16226100  | 1.64646000  |
| H  | 1.67394900  | -5.06203800 | 3.29453800  | H           | -4.57768400 | 1.50730700  | 0.07829900  |
| H  | 2.65636400  | -6.34298000 | 2.56475400  | H           | -7.01302200 | 1.42576700  | 2.88078800  |
| H  | 1.02221900  | -6.03668700 | 1.97160600  | H           | -9.02185800 | 2.86484200  | 3.02195800  |
| C  | 4.77719500  | -4.55218800 | -1.71684800 | H           | -9.34856100 | 4.71762100  | 1.39228500  |
| H  | 5.54252900  | -3.80396000 | -1.95116500 | H           | -7.64485600 | 5.10938000  | -0.37976700 |
| H  | 4.21186500  | -4.74048400 | -2.63941100 | H           | -5.63808000 | 3.66659600  | -0.51386200 |
| H  | 5.28508900  | -5.48444500 | -1.44773400 | O           | -2.02129900 | 1.20863400  | 0.68562600  |
| Ru | -0.13198000 | 0.21976300  | 0.50972500  | O           | -2.05465900 | 0.74063500  | 2.89259800  |
| P  | -1.26011500 | -1.47013200 | -0.64666700 | H           | -5.16374900 | 0.56843700  | 1.44754600  |
| P  | 2.13505600  | -0.50403000 | 0.67892500  |             |             |             |             |
| H  | -2.29713900 | -4.03101500 | 4.49108900  | <b>TS1'</b> |             |             |             |
| H  | -0.80576000 | -0.22037800 | 2.16912700  | C           | -2.29973700 | -0.77051000 | -2.07369500 |
| H  | -0.26585600 | -0.83287600 | 1.91171300  | C           | -2.39858300 | 0.59908600  | -2.32943900 |
| C  | 0.61860800  | 2.53700700  | -0.24644700 | H           | -1.89145500 | 1.30506600  | -1.68579200 |
| C  | 0.96550800  | 3.91423300  | -0.76762800 | C           | -3.14201900 | 1.07349100  | -3.42416800 |
| C  | 2.10978400  | 4.58379900  | 0.02111200  | C           | -3.78353600 | 0.15297600  | -4.25221800 |
| C  | 2.49313900  | 5.93105800  | -0.55231600 | H           | -4.35886400 | 0.51407900  | -5.10372200 |
| C  | 3.43649300  | 6.02519000  | -1.58575200 | C           | -3.70182700 | -1.22961900 | -4.02068000 |
| C  | 3.77403700  | 7.26058400  | -2.14046900 | C           | -2.95308900 | -1.67657000 | -2.93227600 |
| C  | 3.17106800  | 8.42880000  | -1.66894900 | H           | -2.87201600 | -2.74510500 | -2.75268600 |
| C  | 2.23075100  | 8.35009300  | -0.63974900 | C           | -3.24363000 | 2.56045200  | -3.67915300 |
| C  | 1.89713800  | 7.11167500  | -0.08817600 | H           | -3.67515900 | 2.77106500  | -4.66335100 |

|   |             |             |             |   |            |             |             |
|---|-------------|-------------|-------------|---|------------|-------------|-------------|
| H | -2.25949300 | 3.04011900  | -3.62806500 | H | 4.18310500 | 0.47129600  | 5.92243700  |
| H | -3.87774200 | 3.04980400  | -2.92809800 | C | 4.43594900 | -0.66776900 | 4.11092000  |
| C | -4.40044100 | -2.20438200 | -4.94205900 | C | 3.91719100 | -0.91398800 | 2.83848600  |
| H | -4.27520000 | -3.23670700 | -4.60018800 | H | 4.40145500 | -1.65474300 | 2.20875200  |
| H | -4.00560400 | -2.14236300 | -5.96428900 | C | 1.97622000 | 1.98952700  | 5.37071300  |
| H | -5.47669500 | -1.99926600 | -5.00185500 | H | 2.38008700 | 1.97756000  | 6.38843700  |
| C | -0.46371300 | -2.82859700 | -1.50366800 | H | 0.89744100 | 1.80430900  | 5.42943300  |
| C | -0.59945500 | -4.16707500 | -1.12502700 | H | 2.10447600 | 3.00393900  | 4.97189900  |
| H | -1.20894000 | -4.43010100 | -0.26637200 | C | 5.65293800 | -1.41143500 | 4.61401100  |
| C | 0.02070100  | -5.19088000 | -1.85655300 | H | 6.43073600 | -0.72008500 | 4.96123100  |
| C | 0.76906700  | -4.85095700 | -2.98647400 | H | 6.08845100 | -2.04049600 | 3.83110600  |
| H | 1.23306500  | -5.64198400 | -3.57376900 | H | 5.40189200 | -2.06259000 | 5.46134400  |
| C | 0.92559000  | -3.51809000 | -3.38990900 | C | 3.32292600 | 0.21559800  | -0.46775900 |
| C | 0.30397900  | -2.51867400 | -2.63754000 | C | 4.51950400 | 0.79990300  | -0.02321000 |
| H | 0.38486200  | -1.48488200 | -2.96474200 | H | 4.76999300 | 0.78524400  | 1.03216300  |
| C | -0.11234800 | -6.63112900 | -1.41834600 | C | 5.40029100 | 1.41360100  | -0.92036000 |
| H | 0.62894800  | -6.87322500 | -0.64494500 | C | 5.06932700 | 1.42781300  | -2.28269200 |
| H | 0.04760000  | -7.32229900 | -2.25286300 | H | 5.75071900 | 1.89853100  | -2.98999200 |
| H | -1.10239100 | -6.83361800 | -0.99492200 | C | 3.88348100 | 0.85901300  | -2.75584300 |
| C | 1.75476700  | -3.16776500 | -4.60488500 | C | 3.01336700 | 0.26290400  | -1.83265100 |
| H | 1.76617900  | -3.98617900 | -5.33290800 | H | 2.07292400 | -0.15043300 | -2.18133700 |
| H | 2.79809900  | -2.96339600 | -4.32793700 | C | 6.67540600 | 2.06474600  | -0.43264200 |
| H | 1.37085300  | -2.27329400 | -5.10715000 | H | 6.59904300 | 3.15968800  | -0.45753800 |
| C | -2.56879600 | -2.22162000 | 0.44730200  | H | 7.53216500 | 1.78748500  | -1.05820700 |
| C | -3.94363300 | -2.12678600 | 0.20119900  | H | 6.90209900 | 1.77542400  | 0.59831600  |
| H | -4.30230200 | -1.59844000 | -0.67558400 | C | 3.52941800 | 0.89069800  | -4.22553400 |
| C | -4.87746800 | -2.70941400 | 1.07062400  | H | 3.50737200 | -0.11928300 | -4.65492800 |
| C | -4.41070200 | -3.39930800 | 2.19217500  | H | 4.25274600 | 1.47893300  | -4.79937300 |
| H | -5.12768800 | -3.86280000 | 2.86785800  | H | 2.53640500 | 1.32824400  | -4.38314700 |
| C | -3.04235000 | -3.50166500 | 2.47411900  | C | 2.46912700 | -2.38552000 | 0.55440500  |
| C | -2.13455300 | -2.90323600 | 1.59566600  | C | 3.31243200 | -2.93220100 | -0.41615600 |
| H | -1.07206200 | -2.96679700 | 1.81368600  | H | 3.76708900 | -2.28910900 | -1.16363500 |
| C | -6.35957200 | -2.57371400 | 0.80210800  | C | 3.60596800 | -4.30433500 | -0.42898000 |
| H | -6.74344100 | -1.61086600 | 1.16518100  | C | 3.05095100 | -5.11829300 | 0.56136800  |
| H | -6.93132400 | -3.36237300 | 1.30255700  | H | 3.29412000 | -6.17972900 | 0.57475500  |
| H | -6.57928100 | -2.62267700 | -0.27008000 | C | 2.19783700 | -4.60000300 | 1.54577100  |
| C | -2.56086900 | -4.20876200 | 3.72067600  | C | 1.91354100 | -3.23262900 | 1.52695700  |
| H | -1.56699500 | -4.64641700 | 3.57713400  | H | 1.27973200 | -2.81434700 | 2.30564900  |
| H | -3.24522300 | -5.01118700 | 4.01714400  | C | 1.59374300 | -5.50336400 | 2.59738700  |
| C | 2.77798900  | -0.23153600 | 2.37068000  | H | 1.35831600 | -4.95053300 | 3.51309900  |
| C | 2.16070100  | 0.70492200  | 3.20473300  | H | 2.27321300 | -6.32108600 | 2.86231000  |
| H | 1.29051900  | 1.24582900  | 2.85393800  | H | 0.66039000 | -5.96110600 | 2.24182800  |
| C | 2.65982100  | 0.96767100  | 4.49093300  | C | 4.49625000 | -4.88479700 | -1.50325100 |
| C | 3.79140200  | 0.27634300  | 4.92503400  | H | 5.29702200 | -4.19043200 | -1.78094800 |

|    |             |             |             |
|----|-------------|-------------|-------------|
| H  | 3.91931600  | -5.09791500 | -2.41307700 |
| H  | 4.95803300  | -5.82393300 | -1.18019700 |
| Ru | -0.10498900 | 0.26218000  | 0.46391500  |
| P  | -1.30374400 | -1.41245800 | -0.64189500 |
| P  | 2.09506700  | -0.57238600 | 0.67476500  |
| H  | -2.48999100 | -3.51101300 | 4.56554600  |
| H  | -0.94263100 | -0.03948900 | 2.18728000  |
| H  | -0.31541600 | -0.65708900 | 1.90638400  |
| C  | 0.75331200  | 2.54594900  | -0.31578500 |
| C  | 1.17707100  | 3.91000000  | -0.81738800 |
| C  | 2.37547000  | 4.48953500  | -0.03673200 |
| C  | 2.81504400  | 5.83571200  | -0.57035800 |
| C  | 3.74998000  | 5.92189900  | -1.61189100 |
| C  | 4.13872600  | 7.15888600  | -2.12843700 |
| C  | 3.59625100  | 8.33669400  | -1.60985100 |
| C  | 2.66466300  | 8.26601500  | -0.57208300 |
| C  | 2.27991000  | 7.02604500  | -0.05890900 |
| H  | 1.40567300  | 3.82627600  | -1.88443200 |
| H  | 0.31649500  | 4.58747200  | -0.72773500 |
| H  | 2.09823200  | 4.56655000  | 1.01948400  |
| H  | 4.17829700  | 5.00688100  | -2.01688100 |
| H  | 4.86835500  | 7.20355200  | -2.93329300 |
| H  | 3.89984200  | 9.30124300  | -2.00828800 |
| H  | 2.24042500  | 9.17716300  | -0.15762400 |
| H  | 1.55849000  | 6.97913600  | 0.75439500  |
| O  | 0.78533800  | 2.26974500  | 0.92503300  |
| O  | 0.35993600  | 1.65739700  | -1.14110300 |
| H  | 3.20733100  | 3.77740900  | -0.09171500 |
| C  | -2.49069400 | 1.36349900  | 1.79614000  |
| C  | -3.73427100 | 2.22416900  | 1.97709900  |
| C  | -4.84975500 | 1.86128000  | 0.97175000  |
| C  | -6.06824500 | 2.74743100  | 1.11341000  |
| C  | -7.10885700 | 2.41005600  | 1.99013000  |
| C  | -8.21805100 | 3.24327900  | 2.14493300  |
| C  | -8.30607100 | 4.43456700  | 1.42185400  |
| C  | -7.27760200 | 4.78343200  | 0.54394100  |
| C  | -6.17131600 | 3.94591700  | 0.39318000  |
| H  | -4.08899500 | 2.11965500  | 3.00595000  |
| H  | -3.44346400 | 3.27207500  | 1.82871400  |
| H  | -4.43907800 | 1.93436100  | -0.04047100 |
| H  | -7.04840600 | 1.48215600  | 2.55566400  |
| H  | -9.01507700 | 2.96032600  | 2.82807900  |
| H  | -9.16999100 | 5.08353700  | 1.53892500  |
| H  | -7.33857000 | 5.70618600  | -0.02769100 |

|   |             |            |             |
|---|-------------|------------|-------------|
| H | -5.37563500 | 4.22202100 | -0.29616200 |
| O | -1.98421000 | 1.33039500 | 0.62373900  |
| O | -2.03179300 | 0.73608900 | 2.78984900  |
| H | -5.13176900 | 0.81159000 | 1.12323900  |

**Int2'**

|   |             |             |             |
|---|-------------|-------------|-------------|
| C | -0.72070400 | 2.27819600  | 2.00061800  |
| C | -1.71091700 | 1.39345400  | 2.43617300  |
| H | -1.89399800 | 0.47558700  | 1.89182400  |
| C | -2.45562500 | 1.65823700  | 3.59804200  |
| C | -2.19231200 | 2.82644900  | 4.31383500  |
| H | -2.75998900 | 3.03537800  | 5.21991600  |
| C | -1.20610900 | 3.73597400  | 3.90046800  |
| C | -0.47681300 | 3.44761900  | 2.74584900  |
| H | 0.29639700  | 4.14075500  | 2.42647100  |
| C | -3.52716900 | 0.68857200  | 4.04341700  |
| H | -3.21807400 | -0.34708600 | 3.86603000  |
| H | -4.46179300 | 0.84542700  | 3.48799400  |
| H | -3.75688800 | 0.80247300  | 5.10833100  |
| C | -0.93666200 | 4.99130100  | 4.70001000  |
| H | -0.14623400 | 5.59385400  | 4.24138800  |
| H | -0.62298300 | 4.75398900  | 5.72457800  |
| H | -1.83357700 | 5.61898700  | 4.77785700  |
| C | 1.90991200  | 2.54573100  | 1.02857500  |
| C | 2.57992000  | 3.62426100  | 0.44452400  |
| H | 2.15907800  | 4.11933100  | -0.42476900 |
| C | 3.78962300  | 4.09679700  | 0.97456400  |
| C | 4.30800200  | 3.48099300  | 2.11709200  |
| H | 5.23516400  | 3.85549300  | 2.54858500  |
| C | 3.66219100  | 2.39416900  | 2.72210400  |
| C | 2.46923600  | 1.93293300  | 2.16046000  |
| H | 1.95940700  | 1.09446400  | 2.62715000  |
| C | 4.52090500  | 5.23808600  | 0.30575000  |
| H | 5.21249300  | 5.73341100  | 0.99568700  |
| H | 3.82445400  | 5.99271900  | -0.07678300 |
| H | 5.10937800  | 4.87750800  | -0.54852600 |
| C | 4.21958100  | 1.75196200  | 3.97272300  |
| H | 5.29614500  | 1.92893500  | 4.06990000  |
| H | 4.05192900  | 0.66919000  | 3.97240600  |
| H | 3.73988100  | 2.15502300  | 4.87484900  |
| C | -0.34389300 | 3.23623800  | -0.71480200 |
| C | -1.40632000 | 4.09253500  | -0.40011000 |
| H | -1.87257300 | 4.03907800  | 0.57794900  |
| C | -1.88342200 | 5.03116000  | -1.32702600 |

|   |             |             |             |    |             |             |             |
|---|-------------|-------------|-------------|----|-------------|-------------|-------------|
| C | -1.26903400 | 5.10936000  | -2.57929400 | H  | 1.85226600  | -2.95522500 | 5.42210100  |
| H | -1.62446800 | 5.84212900  | -3.30219600 | H  | 0.52887900  | -2.18693500 | 4.52143400  |
| C | -0.20827700 | 4.26331300  | -2.92912500 | C  | 3.36273300  | 0.08342200  | -0.92557700 |
| C | 0.23765600  | 3.32774500  | -1.99034200 | C  | 4.51331100  | 0.21559800  | -0.14606500 |
| H | 1.04783300  | 2.65534400  | -2.25615000 | H  | 4.60668900  | -0.34027200 | 0.78122900  |
| C | -3.05228000 | 5.92556000  | -0.97776200 | C  | 5.57335100  | 1.04425400  | -0.55035500 |
| H | -3.03396000 | 6.85473100  | -1.55745000 | C  | 5.46051100  | 1.73479800  | -1.75752600 |
| H | -3.05191900 | 6.18863700  | 0.08561300  | H  | 6.28586300  | 2.36324800  | -2.08964200 |
| H | -4.01090200 | 5.43145700  | -1.18860800 | C  | 4.31479500  | 1.62756800  | -2.56085700 |
| C | 0.41207300  | 4.33703500  | -4.30619000 | C  | 3.27506200  | 0.80155800  | -2.13129800 |
| H | 1.45016000  | 3.98923300  | -4.29894600 | H  | 2.39322800  | 0.68662300  | -2.75589900 |
| H | 0.39937100  | 5.36037800  | -4.69760400 | C  | 4.22088000  | 2.38768700  | -3.86485700 |
| C | 2.25830200  | -2.34675300 | -1.87381900 | H  | 5.14030700  | 2.28810900  | -4.45410100 |
| C | 1.21149100  | -3.17677500 | -2.28627500 | H  | 4.06619900  | 3.46145700  | -3.69295700 |
| H | 0.22930100  | -3.05934900 | -1.84281100 | H  | 3.38926100  | 2.02697300  | -4.47879800 |
| C | 1.40822400  | -4.15275500 | -3.27716500 | C  | 6.80680800  | 1.17738500  | 0.31264400  |
| C | 2.67276900  | -4.28597800 | -3.85115200 | H  | 7.12996500  | 0.20550300  | 0.70337300  |
| H | 2.83240500  | -5.03909100 | -4.62170700 | H  | 6.61096700  | 1.82482500  | 1.17693100  |
| C | 3.74217800  | -3.46643500 | -3.46303100 | H  | 7.64255800  | 1.61239800  | -0.24563200 |
| C | 3.52119400  | -2.50197000 | -2.47723800 | Ru | -0.16510400 | -0.21176600 | -0.39736600 |
| H | 4.34528900  | -1.85853100 | -2.18692200 | P  | 0.25718000  | 1.91659800  | 0.45454300  |
| C | 0.25623500  | -5.03210900 | -3.70941500 | P  | 1.98184500  | -1.09092500 | -0.51511000 |
| H | -0.15025800 | -5.60114700 | -2.86424600 | H  | -0.13669800 | 3.70910800  | -5.02087900 |
| H | 0.56386900  | -5.74818800 | -4.47874200 | H  | 0.25490700  | 0.36807000  | -1.85970300 |
| H | -0.56837200 | -4.43418200 | -4.11689100 | C  | -1.49551200 | -2.30647100 | 0.48222200  |
| C | 5.10030400  | -3.61891100 | -4.11128700 | C  | -2.37695500 | -3.46833800 | 0.91227700  |
| H | 5.47685300  | -4.64542800 | -4.01877600 | C  | -2.06035200 | -4.78365500 | 0.17108300  |
| H | 5.83752100  | -2.94946400 | -3.65644600 | C  | -2.96854100 | -5.91970700 | 0.59059500  |
| H | 5.06032300  | -3.38863800 | -5.18385900 | C  | -2.66448600 | -6.70807400 | 1.70962300  |
| C | 2.59556600  | -1.99584600 | 0.98757900  | C  | -3.51620000 | -7.73505900 | 2.11893400  |
| C | 3.67967400  | -2.89035500 | 0.95027300  | C  | -4.69277900 | -7.99357100 | 1.41234200  |
| H | 4.18694300  | -3.08749800 | 0.01072100  | C  | -5.00778000 | -7.21811200 | 0.29480300  |
| C | 4.11187000  | -3.54929600 | 2.10340600  | C  | -4.15182500 | -6.19216900 | -0.10992300 |
| C | 3.43436400  | -3.30710600 | 3.30859000  | H  | -2.27679000 | -3.59355000 | 1.99484500  |
| H | 3.75715300  | -3.82507700 | 4.21086500  | H  | -3.42198100 | -3.18705800 | 0.71996600  |
| C | 2.34605900  | -2.43546600 | 3.37594600  | H  | -2.14820900 | -4.60395500 | -0.90526200 |
| C | 1.93412200  | -1.78551000 | 2.20135600  | H  | -1.74660500 | -6.51678800 | 2.26205400  |
| H | 1.05846500  | -1.14563700 | 2.22244900  | H  | -3.25866600 | -8.33668400 | 2.98709900  |
| C | 5.27871200  | -4.51062900 | 2.06101900  | H  | -5.35583200 | -8.79507200 | 1.72732600  |
| H | 6.11244900  | -4.15815100 | 2.68210200  | H  | -5.91810600 | -7.41484300 | -0.26610600 |
| H | 5.65421200  | -4.63725300 | 1.04072000  | H  | -4.40072400 | -5.59619700 | -0.98581600 |
| H | 4.99537800  | -5.50114300 | 2.43815300  | O  | -1.07021400 | -1.48121500 | 1.34053100  |
| C | 1.61355000  | -2.18985900 | 4.67605200  | O  | -1.20869600 | -2.16012800 | -0.75381100 |
| H | 1.87859700  | -1.21536400 | 5.10767700  | H  | -1.01383600 | -5.05360200 | 0.36159500  |

|   |             |             |             |
|---|-------------|-------------|-------------|
| C | -2.77899700 | 0.69818900  | -1.69373500 |
| C | -4.21990000 | 1.10041000  | -1.89722800 |
| C | -5.07136300 | 1.01914600  | -0.61946200 |
| C | -6.49575900 | 1.47449600  | -0.85855000 |
| C | -7.46731500 | 0.57803100  | -1.32504500 |
| C | -8.77271100 | 1.00173200  | -1.57834800 |
| C | -9.12961600 | 2.33521900  | -1.36710400 |
| C | -8.17282800 | 3.23842000  | -0.90005000 |
| C | -6.86847700 | 2.80919700  | -0.64840600 |
| H | -4.21460500 | 2.12452600  | -2.29402700 |
| H | -4.63801900 | 0.47631500  | -2.69601500 |
| H | -5.06043300 | -0.01312400 | -0.25085900 |
| H | -7.19852400 | -0.46424600 | -1.48530100 |
| H | -9.51201600 | 0.28948200  | -1.93562000 |
| H | 10.14643300 | 2.66656400  | -1.56014100 |
| H | -8.44283200 | 4.27690800  | -0.72603600 |
| H | -6.13003600 | 3.51675300  | -0.27598400 |
| O | -2.29493700 | 0.49363800  | -0.57432400 |
| H | -4.59989600 | 1.62945200  | 0.15785800  |
| O | -2.08055900 | 0.60662800  | -2.80695200 |
| H | -1.13220200 | 0.39689000  | -2.52295500 |

**TS2'**

|   |             |            |             |
|---|-------------|------------|-------------|
| C | 1.90730800  | 2.86526900 | -1.21972500 |
| C | 0.91551700  | 3.33646900 | -2.08891600 |
| H | 0.18180300  | 2.64407600 | -2.48926300 |
| C | 0.84610700  | 4.69344000 | -2.43474700 |
| C | 1.77998700  | 5.57696900 | -1.88719300 |
| H | 1.72679000  | 6.63432900 | -2.14353300 |
| C | 2.78027800  | 5.13650700 | -1.01147900 |
| C | 2.83561900  | 3.77670400 | -0.68840500 |
| H | 3.60956500  | 3.43364400 | -0.00960400 |
| C | -0.21448100 | 5.17986000 | -3.39676200 |
| H | -1.15310800 | 4.63195200 | -3.26269800 |
| H | 0.09771900  | 5.03400300 | -4.43974300 |
| H | -0.41827000 | 6.24788800 | -3.26366800 |
| C | 3.76288300  | 6.11632000 | -0.40959600 |
| H | 4.61628500  | 5.60045800 | 0.04251500  |
| H | 3.29139700  | 6.72186100 | 0.37585600  |
| H | 4.14926500  | 6.81276600 | -1.16318000 |
| C | 3.08128600  | 1.03201400 | 0.65056700  |
| C | 4.36512700  | 0.47757700 | 0.65514700  |
| H | 4.75479100  | 0.00255400 | -0.23924400 |
| C | 5.17163900  | 0.53445400 | 1.80016700  |

|   |             |             |             |
|---|-------------|-------------|-------------|
| C | 4.66929800  | 1.16585400  | 2.94193000  |
| H | 5.29508600  | 1.23240400  | 3.83061900  |
| C | 3.38494200  | 1.72511900  | 2.96954900  |
| C | 2.60018700  | 1.65060200  | 1.81440000  |
| H | 1.61341700  | 2.10420700  | 1.80961200  |
| C | 6.54943900  | -0.08676000 | 1.79476900  |
| H | 7.15948800  | 0.28149600  | 2.62636200  |
| H | 7.08369000  | 0.12797400  | 0.86208100  |
| H | 6.48551400  | -1.17891600 | 1.88649900  |
| C | 2.85206100  | 2.38610800  | 4.22026600  |
| H | 3.65150300  | 2.58019900  | 4.94295000  |
| H | 2.10455600  | 1.74990300  | 4.71146000  |
| H | 2.36294500  | 3.34017600  | 3.99220800  |
| C | 3.14752900  | 0.44329400  | -2.18523800 |
| C | 4.14618400  | 1.27516600  | -2.72504800 |
| H | 4.24552300  | 2.29631300  | -2.37092900 |
| C | 5.01274000  | 0.81349200  | -3.71764700 |
| C | 4.85603900  | -0.50033300 | -4.18716200 |
| H | 5.51172600  | -0.86237800 | -4.97764900 |
| C | 3.86760600  | -1.34710900 | -3.68411800 |
| C | 3.02882100  | -0.86342700 | -2.66657600 |
| H | 2.23998900  | -1.50067600 | -2.28276800 |
| C | 6.09047600  | 1.70684700  | -4.28923200 |
| H | 7.09076500  | 1.29416100  | -4.10597200 |
| H | 6.05578700  | 2.70700700  | -3.84643000 |
| H | 5.98363900  | 1.81760000  | -5.37546700 |
| C | 3.65241700  | -2.73142800 | -4.25061500 |
| H | 3.67231800  | -3.49869100 | -3.46780900 |
| H | 4.41775600  | -2.98585600 | -4.99079200 |
| C | -0.97750300 | -2.76950000 | 0.96267600  |
| C | -2.36696700 | -2.56134200 | 0.91500600  |
| H | -2.75794000 | -1.55076400 | 0.96885200  |
| C | -3.25590500 | -3.63252900 | 0.78620900  |
| C | -2.73458700 | -4.93115400 | 0.69650100  |
| H | -3.41876900 | -5.77346400 | 0.60454800  |
| C | -1.35904200 | -5.16986000 | 0.73393900  |
| C | -0.48841700 | -4.07814000 | 0.87796000  |
| H | 0.57731800  | -4.26980500 | 0.93958100  |
| C | -4.74770200 | -3.39531900 | 0.72303800  |
| H | -5.01434700 | -2.42230200 | 1.14741900  |
| H | -5.29981400 | -4.16906400 | 1.26913800  |
| H | -5.10313400 | -3.41004000 | -0.31521500 |
| C | -0.80914600 | -6.57409200 | 0.61677800  |
| H | -1.55094500 | -7.32152100 | 0.91782300  |



|    |             |             |             |              |             |             |             |
|----|-------------|-------------|-------------|--------------|-------------|-------------|-------------|
| H  | 0.08118200  | -6.70987400 | 1.24098800  | C            | -5.56799200 | 3.33041100  | 0.67314300  |
| H  | -0.51663100 | -6.80320800 | -0.41692900 | C            | -6.53179300 | 2.81128900  | 1.54868800  |
| C  | -0.46005200 | -0.77662500 | 2.91450100  | C            | -7.51681200 | 3.63147200  | 2.10185400  |
| C  | -0.79347200 | -1.75866500 | 3.86424900  | C            | -7.55494200 | 4.99112600  | 1.78670800  |
| H  | -0.72103500 | -2.80981900 | 3.60082700  | C            | -6.60228400 | 5.52192200  | 0.91426600  |
| C  | -1.23041800 | -1.41173200 | 5.14487400  | C            | -5.61988100 | 4.69716800  | 0.36435700  |
| C  | -1.34154900 | -0.05185100 | 5.46848200  | H            | -3.42852800 | 2.15037800  | 1.98069400  |
| H  | -1.69615600 | 0.23017300  | 6.45913900  | H            | -2.79026300 | 3.49038300  | 1.02897800  |
| C  | -1.02194700 | 0.94887300  | 4.54813000  | H            | -4.23168300 | 2.76617300  | -0.91629000 |
| C  | -0.57680500 | 0.57138700  | 3.27039600  | H            | -6.51216200 | 1.75131600  | 1.79398000  |
| H  | -0.36157900 | 1.33863600  | 2.53660700  | H            | -8.25771900 | 3.20702600  | 2.77480700  |
| C  | -1.59534600 | -2.47357000 | 6.15809100  | H            | -8.32318100 | 5.63070000  | 2.21334700  |
| H  | -1.01267800 | -2.36444400 | 7.08140700  | H            | -6.62676900 | 6.57807400  | 0.65760500  |
| H  | -1.41545200 | -3.47899100 | 5.76497300  | H            | -4.88434900 | 5.11677400  | -0.31916100 |
| H  | -2.65451700 | -2.41054300 | 6.43821600  | O            | -0.88852800 | 1.94506400  | 0.46153100  |
| C  | -1.14533100 | 2.41066800  | 4.91852600  | O            | -2.38691400 | 0.41851600  | -0.04239200 |
| H  | -0.23139200 | 2.77983700  | 5.40305200  | H            | -4.82449000 | 1.41058800  | 0.03238900  |
| H  | -1.97207000 | 2.57839800  | 5.61749700  | C            | -0.58192500 | -0.34400600 | -3.00436600 |
| H  | -1.31654000 | 3.03280500  | 4.03401500  | C            | -1.68174100 | -1.29275000 | -3.50056700 |
| C  | 1.76779700  | -2.03551800 | 1.54571700  | C            | -2.91570000 | -1.40292600 | -2.59898000 |
| C  | 2.36614000  | -2.01693100 | 2.81082800  | C            | -4.00792800 | -2.22540300 | -3.25085400 |
| H  | 1.86715500  | -1.52498000 | 3.63833300  | C            | -4.04572000 | -3.62027800 | -3.10345700 |
| C  | 3.60458500  | -2.63133200 | 3.03685900  | C            | -5.03446000 | -4.38350900 | -3.72802700 |
| C  | 4.23503000  | -3.28204800 | 1.97183400  | C            | -6.00667700 | -3.76352900 | -4.51586600 |
| H  | 5.18701400  | -3.78239800 | 2.14231300  | C            | -5.98221400 | -2.37591300 | -4.67086200 |
| C  | 3.67046700  | -3.30914800 | 0.69103000  | C            | -4.99224700 | -1.61765200 | -4.04332000 |
| C  | 2.43953400  | -2.67350900 | 0.49243300  | H            | -1.97159000 | -0.89148700 | -4.48095300 |
| H  | 1.98602300  | -2.69203700 | -0.49448200 | H            | -1.23979000 | -2.27818700 | -3.68531800 |
| C  | 4.37743800  | -3.99663100 | -0.45504300 | H            | -2.62921500 | -1.85391600 | -1.64440200 |
| H  | 5.22198000  | -4.59698600 | -0.10151200 | H            | -3.29599200 | -4.10888900 | -2.48437000 |
| H  | 4.76681900  | -3.26536600 | -1.17483400 | H            | -5.04690200 | -5.46292500 | -3.59690900 |
| H  | 3.69998700  | -4.66159900 | -1.00420300 | H            | -6.77851200 | -4.35559500 | -5.00086000 |
| C  | 4.24682400  | -2.57246600 | 4.40365100  | H            | -6.73759100 | -1.88207200 | -5.27727600 |
| H  | 3.50591700  | -2.69761300 | 5.20124200  | H            | -4.98269300 | -0.53627700 | -4.16385800 |
| H  | 4.73381900  | -1.60154800 | 4.56430200  | O            | -0.89682600 | 0.84571200  | -2.57196600 |
| H  | 5.00939700  | -3.34924400 | 4.52401400  | H            | -3.27604000 | -0.39642400 | -2.36951900 |
| Ru | -0.17883600 | 0.20429700  | -0.62458000 | O            | 0.45788800  | -0.43079600 | -3.92342600 |
| P  | 1.99326800  | 1.04086400  | -0.85132900 | H            | 1.03582800  | 0.33629000  | -3.77244400 |
| P  | 0.11009200  | -1.26935400 | 1.20921800  |              |             |             |             |
| H  | 2.67265600  | -2.79541300 | -4.74005600 | <b>Int3'</b> |             |             |             |
| H  | -0.07928400 | -1.03757200 | -1.89773600 | C            | 1.90148200  | 2.78603800  | -1.42966800 |
| C  | -2.10805400 | 1.56324300  | 0.42406000  | C            | 0.89031000  | 3.20345400  | -2.30258500 |
| C  | -3.19371200 | 2.47545600  | 0.95716800  | H            | 0.13763200  | 2.49176800  | -2.62768900 |
| C  | -4.47886600 | 2.44668200  | 0.10373200  | C            | 0.83054700  | 4.53152500  | -2.75164300 |

|   |             |             |             |   |             |             |             |
|---|-------------|-------------|-------------|---|-------------|-------------|-------------|
| C | 1.80049500  | 5.43545900  | -2.31355400 | H | 4.32065300  | -3.34512500 | -4.77158600 |
| H | 1.76151000  | 6.46755300  | -2.65974200 | H | 2.58197300  | -3.09002800 | -4.53208100 |
| C | 2.82175600  | 5.04818500  | -1.43529200 | C | -0.93313400 | -2.74899600 | 1.09163200  |
| C | 2.86136900  | 3.72039100  | -1.00066900 | C | -2.32322300 | -2.56713100 | 0.98973800  |
| H | 3.65018100  | 3.41835400  | -0.31940200 | H | -2.73186300 | -1.56204000 | 0.97759500  |
| C | -0.28624800 | 4.97109000  | -3.67143700 | C | -3.19165900 | -3.65915500 | 0.89615900  |
| H | -0.04820900 | 5.91711900  | -4.16946700 | C | -2.64819600 | -4.95147300 | 0.89507100  |
| H | -1.22120800 | 5.11646800  | -3.11447400 | H | -3.31623800 | -5.80908500 | 0.83001600  |
| H | -0.48848000 | 4.21954400  | -4.44240600 | C | -1.27089900 | -5.16467100 | 0.98765700  |
| C | 3.85022900  | 6.05176900  | -0.96343100 | C | -0.42206700 | -4.05241300 | 1.09720200  |
| H | 4.64174700  | 5.56968600  | -0.38064600 | H | 0.64372500  | -4.22267100 | 1.20390100  |
| H | 3.39426500  | 6.82236000  | -0.32825300 | C | -4.68447400 | -3.45030200 | 0.77930300  |
| H | 4.32194400  | 6.57069600  | -1.80701600 | H | -4.98178800 | -2.47377200 | 1.17435600  |
| C | 3.05019500  | 1.11284900  | 0.59069900  | H | -5.24015400 | -4.22276200 | 1.32333200  |
| C | 4.33221700  | 0.55967800  | 0.66025100  | H | -5.00630600 | -3.49178600 | -0.26911700 |
| H | 4.73201000  | 0.00674000  | -0.18348600 | C | -0.69713700 | -6.56396000 | 0.96387400  |
| C | 5.12638400  | 0.72003600  | 1.80482500  | H | -1.42917300 | -7.30346100 | 1.30575600  |
| C | 4.61147900  | 1.45021900  | 2.87946200  | H | 0.19005700  | -6.64538700 | 1.60173100  |
| H | 5.22742800  | 1.59727100  | 3.76544500  | H | -0.39272300 | -6.85266600 | -0.05133100 |
| C | 3.32678600  | 2.00965800  | 2.84195400  | C | -0.47563300 | -0.65134700 | 2.95496300  |
| C | 2.55607600  | 1.83409300  | 1.68910300  | C | -0.84403000 | -1.58952000 | 3.93518100  |
| H | 1.57244400  | 2.29082800  | 1.62974200  | H | -0.78509700 | -2.65118100 | 3.71459700  |
| C | 6.50524400  | 0.10451900  | 1.86915100  | C | -1.29945100 | -1.18524500 | 5.19249500  |
| H | 7.10498100  | 0.54604600  | 2.67204600  | C | -1.39331200 | 0.18775000  | 5.46016100  |
| H | 7.04947700  | 0.23849700  | 0.92718200  | H | -1.76294900 | 0.51475000  | 6.43129200  |
| H | 6.44169800  | -0.97541700 | 2.05519600  | C | -1.03685900 | 1.14624000  | 4.50869100  |
| C | 2.78197800  | 2.77553300  | 4.02587600  | C | -0.57293800 | 0.71163500  | 3.25630200  |
| H | 3.58786100  | 3.16711500  | 4.65590100  | H | -0.32405400 | 1.44476200  | 2.49897100  |
| H | 2.15398000  | 2.13083600  | 4.65491200  | C | -1.70081900 | -2.20075800 | 6.23883900  |
| H | 2.16034300  | 3.61877900  | 3.70567700  | H | -1.54267500 | -3.22361000 | 5.88315600  |
| C | 3.13778200  | 0.28427000  | -2.18887200 | H | -2.76049100 | -2.10128500 | 6.50601100  |
| C | 4.17278300  | 1.04799200  | -2.76082100 | H | -1.12387000 | -2.07376700 | 7.16350400  |
| H | 4.30068400  | 2.08618000  | -2.47127100 | C | -1.14325900 | 2.62280600  | 4.82136500  |
| C | 5.03900400  | 0.49757100  | -3.70702400 | H | -0.23944100 | 2.99263700  | 5.32381700  |
| C | 4.84543100  | -0.83708900 | -4.09807500 | H | -1.98975500 | 2.83100300  | 5.48500200  |
| H | 5.50163300  | -1.26899000 | -4.85218900 | H | -1.27281900 | 3.21534400  | 3.90987700  |
| C | 3.81889600  | -1.61673900 | -3.56459000 | C | 1.78999400  | -1.93512500 | 1.68102500  |
| C | 2.97995000  | -1.04306400 | -2.59524100 | C | 2.37621400  | -1.81900100 | 2.94657400  |
| H | 2.16181800  | -1.62868300 | -2.19121700 | H | 1.85982300  | -1.28148100 | 3.73425800  |
| C | 6.15353200  | 1.31913000  | -4.31462800 | C | 3.62391200  | -2.39263100 | 3.22368800  |
| H | 6.16582500  | 2.33575900  | -3.90971700 | C | 4.27769200  | -3.09944000 | 2.20980400  |
| H | 6.04634200  | 1.39452400  | -5.40395000 | H | 5.23788800  | -3.56726200 | 2.42126600  |
| H | 7.13497500  | 0.86870200  | -4.11944800 | C | 3.72602300  | -3.22380000 | 0.92891400  |
| C | 3.56414000  | -3.02558600 | -4.04778400 | C | 2.48408200  | -2.62943900 | 0.67861500  |

|    |             |             |             |
|----|-------------|-------------|-------------|
| H  | 2.04140000  | -2.73001300 | -0.30826100 |
| C  | 4.45654500  | -3.97195900 | -0.16315700 |
| H  | 5.32256000  | -4.51230600 | 0.23280800  |
| H  | 4.81799800  | -3.28554300 | -0.93945900 |
| H  | 3.80327000  | -4.70187200 | -0.65639900 |
| C  | 4.24950400  | -2.23180300 | 4.59006800  |
| H  | 3.50854900  | -2.35564900 | 5.38798200  |
| H  | 4.68368200  | -1.22991900 | 4.70514600  |
| H  | 5.04975000  | -2.96104700 | 4.75451100  |
| Ru | -0.18355300 | 0.16049000  | -0.63581300 |
| P  | 1.98046400  | 0.99625100  | -0.91846900 |
| P  | 0.12351800  | -1.21877400 | 1.28400800  |
| H  | 3.56450800  | -3.74534900 | -3.22046700 |
| H  | -0.14389600 | -1.14561100 | -1.94727100 |
| C  | -2.09565500 | 1.55893100  | 0.37157200  |
| C  | -3.15677100 | 2.50862800  | 0.88583300  |
| C  | -4.45452700 | 2.46606600  | 0.05187800  |
| C  | -5.52985800 | 3.37219800  | 0.61217700  |
| C  | -6.48304600 | 2.88261500  | 1.51595200  |
| C  | -7.45638700 | 3.72276400  | 2.05963700  |
| C  | -7.49315200 | 5.07310100  | 1.70651400  |
| C  | -6.55090900 | 5.57448300  | 0.80585300  |
| C  | -5.58012500 | 4.72981900  | 0.26548800  |
| H  | -3.38093900 | 2.22472200  | 1.92378100  |
| H  | -2.73733200 | 3.51923300  | 0.91362000  |
| H  | -4.21995300 | 2.75467800  | -0.98020400 |
| H  | -6.46456600 | 1.82988500  | 1.79073700  |
| H  | -8.18948800 | 3.32100700  | 2.75469200  |
| H  | -8.25251000 | 5.72808500  | 2.12558700  |
| H  | -6.57464800 | 6.62300400  | 0.51960000  |
| H  | -4.85309100 | 5.12639700  | -0.44048700 |
| O  | -0.86801300 | 1.92612900  | 0.36980200  |
| O  | -2.39395800 | 0.40029200  | -0.03981100 |
| H  | -4.80803300 | 1.43083800  | 0.01520200  |
| C  | -0.59707300 | -0.51073800 | -2.98370900 |
| C  | -1.72595000 | -1.42023400 | -3.49474100 |
| C  | -2.93222800 | -1.54957300 | -2.55829000 |
| C  | -4.04690800 | -2.35511500 | -3.19258800 |
| C  | -4.08997900 | -3.75197800 | -3.06683800 |
| C  | -5.09856700 | -4.49953400 | -3.67850300 |
| C  | -6.08616800 | -3.86128500 | -4.43175400 |
| C  | -6.05696200 | -2.47142400 | -4.56487300 |
| C  | -5.04715500 | -1.72905600 | -3.95020400 |
| H  | -2.03750700 | -0.97675600 | -4.44920600 |

|   |             |             |             |
|---|-------------|-------------|-------------|
| H | -1.30456000 | -2.40500600 | -3.72748500 |
| H | -2.61659700 | -2.02405300 | -1.62336500 |
| H | -3.32681900 | -4.25534800 | -2.47640800 |
| H | -5.11402400 | -5.58088100 | -3.56481400 |
| H | -6.87321000 | -4.44097900 | -4.90715000 |
| H | -6.82394800 | -1.96350300 | -5.14451100 |
| H | -5.03321300 | -0.64605200 | -4.05420800 |
| O | -0.90866400 | 0.70792100  | -2.58240900 |
| H | -3.28192500 | -0.54787100 | -2.29347700 |
| O | 0.43312000  | -0.60722900 | -3.92969500 |
| H | 1.01202600  | 0.16094200  | -3.79236400 |

#### Int4-acid

|   |             |             |            |
|---|-------------|-------------|------------|
| C | -0.16259800 | -1.71174500 | 2.80510700 |
| C | 1.23490100  | -1.69481300 | 2.71037400 |
| H | 1.70616900  | -1.51394400 | 1.75125100 |
| C | 2.03550900  | -1.92643500 | 3.83896100 |
| C | 1.41606600  | -2.16897700 | 5.06708800 |
| H | 2.03315700  | -2.35024200 | 5.94600600 |
| C | 0.02228300  | -2.18767400 | 5.19409200 |
| C | -0.75522000 | -1.96535000 | 4.05411000 |
| H | -1.83378600 | -2.00102700 | 4.15045600 |
| C | 3.54124200  | -1.88645600 | 3.73178900 |
| H | 4.01855600  | -2.36234200 | 4.59494800 |
| H | 3.89302400  | -0.84995700 | 3.67839400 |
| H | 3.89243900  | -2.39528500 | 2.82670700 |
| C | -0.62561600 | -2.43574500 | 6.53784500 |
| H | -0.16511000 | -3.28579200 | 7.05541000 |
| H | -1.69547900 | -2.64370900 | 6.43384300 |
| H | -0.52190100 | -1.56391400 | 7.19738500 |
| C | -2.88539800 | -1.44059300 | 1.99389400 |
| C | -3.75314400 | -2.54146200 | 1.96618900 |
| H | -3.46979100 | -3.43957100 | 1.42882500 |
| C | -4.98130300 | -2.51137600 | 2.63635900 |
| C | -5.33469400 | -1.35046300 | 3.33531700 |
| H | -6.28550800 | -1.31767700 | 3.86508300 |
| C | -4.49077900 | -0.23512900 | 3.38364300 |
| C | -3.26576900 | -0.29427400 | 2.70428700 |
| H | -2.59359800 | 0.55678700  | 2.75112000 |
| C | -5.88538100 | -3.72387500 | 2.64271500 |
| H | -6.94290500 | -3.43804700 | 2.65664600 |
| H | -5.70649100 | -4.34658000 | 3.52961100 |
| H | -5.71480400 | -4.35377400 | 1.76362800 |
| C | -4.88535000 | 1.00217600  | 4.15743400 |

|   |             |             |             |    |             |             |             |
|---|-------------|-------------|-------------|----|-------------|-------------|-------------|
| H | -5.80959100 | 0.84007400  | 4.72173000  | H  | -1.67198700 | 2.51175800  | 1.61549900  |
| H | -5.04180000 | 1.85688300  | 3.48923500  | C  | -6.66053900 | 4.16050900  | 0.32277500  |
| H | -4.10334500 | 1.29000100  | 4.87070800  | H  | -6.95096900 | 3.83060100  | -0.67967900 |
| C | -1.13419800 | -3.20604400 | 0.51733600  | H  | -6.74962900 | 5.25270000  | 0.35812200  |
| C | -0.46262300 | -4.27426600 | 1.12912200  | H  | -7.39679800 | 3.75514600  | 1.02930500  |
| H | 0.06123900  | -4.11974200 | 2.06620500  | C  | -2.61847900 | 4.38658500  | 3.36066700  |
| C | -0.45903200 | -5.55154400 | 0.55424200  | H  | -2.89759900 | 5.43198800  | 3.53285900  |
| C | -1.14250700 | -5.74399500 | -0.65238800 | H  | -1.52929300 | 4.33311300  | 3.26716800  |
| H | -1.14949200 | -6.73376900 | -1.10714500 | H  | -2.89407300 | 3.82431200  | 4.26314300  |
| C | -1.82196800 | -4.69759900 | -1.28678100 | C  | -3.63164500 | 0.00399600  | -1.53564100 |
| C | -1.80786100 | -3.42961200 | -0.69214200 | C  | -4.73385600 | -0.39601200 | -0.76014100 |
| H | -2.32320000 | -2.61058900 | -1.18359700 | H  | -4.85120600 | -0.02007000 | 0.25038100  |
| C | 0.23655200  | -6.70531700 | 1.24193200  | C  | -5.70239700 | -1.26394700 | -1.27394500 |
| H | 0.72447800  | -7.36943800 | 0.51965200  | C  | -5.54386800 | -1.75478400 | -2.57741400 |
| H | -0.47526400 | -7.31655100 | 1.81310600  | H  | -6.29588700 | -2.42772100 | -2.98694900 |
| H | 0.99855300  | -6.35125600 | 1.94366300  | C  | -4.45122000 | -1.39056100 | -3.36730800 |
| C | -2.53335500 | -4.91812400 | -2.60264900 | C  | -3.50177300 | -0.50825500 | -2.83240900 |
| H | -3.45610700 | -4.33110200 | -2.65775600 | H  | -2.66293400 | -0.21200700 | -3.45171800 |
| H | -2.78734500 | -5.97346900 | -2.74970600 | C  | -4.29500900 | -1.90929800 | -4.77934500 |
| C | -1.95857600 | 2.21133300  | -2.36086900 | H  | -4.33050900 | -1.09137400 | -5.50987100 |
| C | -1.05407400 | 1.70932400  | -3.30996300 | H  | -5.08876000 | -2.61872300 | -5.03515700 |
| H | -0.57191600 | 0.75180700  | -3.13963600 | H  | -3.33287700 | -2.41799600 | -4.91401500 |
| C | -0.73717900 | 2.43520600  | -4.46315200 | C  | -6.91489700 | -1.64972000 | -0.45737200 |
| C | -1.33484300 | 3.68569000  | -4.65442200 | H  | -7.83453800 | -1.23910000 | -0.89471600 |
| H | -1.09160700 | 4.26056000  | -5.54695000 | H  | -6.83710000 | -1.28164700 | 0.56935900  |
| C | -2.22770900 | 4.22042700  | -3.72046600 | H  | -7.03892500 | -2.73873500 | -0.41589800 |
| C | -2.52939000 | 3.47315900  | -2.57463400 | Ru | -0.34440400 | 0.16993800  | -0.16943700 |
| H | -3.21442800 | 3.89289200  | -1.84639600 | P  | -1.18033100 | -1.50325300 | 1.25998100  |
| C | 0.26843900  | 1.89619500  | -5.45544000 | P  | -2.33753900 | 1.16316000  | -0.86410900 |
| H | 1.28677800  | 2.21613100  | -5.19725100 | H  | -1.90424100 | -4.61079400 | -3.44889600 |
| H | 0.06234600  | 2.25161100  | -6.47113800 | H  | -0.44789100 | 3.12098700  | -0.10497800 |
| H | 0.26817300  | 0.80110400  | -5.47078100 | C  | 1.03928800  | -1.55371900 | -1.49517300 |
| C | -2.87664600 | 5.56647200  | -3.95470600 | C  | 1.82522700  | -2.49197500 | -2.38618300 |
| H | -3.75767300 | 5.47753600  | -4.60487400 | C  | 2.71432000  | -3.47250700 | -1.59425500 |
| H | -2.18664000 | 6.26544200  | -4.44050600 | C  | 3.50692700  | -4.39093200 | -2.49924100 |
| H | -3.20981600 | 6.01903000  | -3.01481100 | C  | 2.98383800  | -5.62680200 | -2.90470300 |
| C | -3.30319000 | 2.31862600  | 0.21675400  | C  | 3.69938600  | -6.46250400 | -3.76395300 |
| C | -4.60060800 | 2.74915900  | -0.10771300 | C  | 4.95556500  | -6.07427300 | -4.23452100 |
| H | -5.10396500 | 2.34245700  | -0.97999600 | C  | 5.48920200  | -4.84613900 | -3.83831100 |
| C | -5.25933700 | 3.70846300  | 0.66873700  | C  | 4.76961200  | -4.01486600 | -2.97848800 |
| C | -4.59140300 | 4.24255500  | 1.77969700  | H  | 1.12088400  | -3.02997900 | -3.02803700 |
| H | -5.08810900 | 5.00376100  | 2.38012800  | H  | 2.45334100  | -1.87818900 | -3.04726500 |
| C | -3.30543200 | 3.82417200  | 2.13638100  | H  | 3.38769800  | -2.89107300 | -0.95622200 |
| C | -2.67039600 | 2.85331400  | 1.34720400  | H  | 2.00697400  | -5.93524100 | -2.53731000 |

|   |             |             |             |
|---|-------------|-------------|-------------|
| H | 3.27770900  | -7.41903600 | -4.06276500 |
| H | 5.51557800  | -6.72492200 | -4.90104500 |
| H | 6.46846000  | -4.53684600 | -4.19504300 |
| H | 5.19380800  | -3.06121100 | -2.67003400 |
| O | -0.14280200 | -1.20231700 | -1.83181600 |
| O | 1.54086200  | -1.09317100 | -0.42330300 |
| H | 2.07719900  | -4.06392500 | -0.92613100 |
| C | 0.50735900  | 2.65838900  | 0.18061100  |
| C | 1.49437600  | 3.78266800  | 0.50740600  |
| C | 1.65708600  | 4.78609000  | -0.65201800 |
| C | 2.67986200  | 5.86043900  | -0.35048200 |
| C | 4.05034400  | 5.59216100  | -0.48785700 |
| C | 5.00537600  | 6.56419500  | -0.18904600 |
| C | 4.60614700  | 7.82770800  | 0.25426500  |
| C | 3.24618500  | 8.10809300  | 0.39555100  |
| C | 2.29414300  | 7.13140500  | 0.09470300  |
| H | 1.10920200  | 4.29766300  | 1.39695500  |
| H | 2.47039300  | 3.37525900  | 0.77830000  |
| H | 1.95393800  | 4.23442700  | -1.55124700 |
| H | 4.36484700  | 4.60901300  | -0.83312000 |
| H | 6.06223300  | 6.33765300  | -0.30719700 |
| H | 5.34881000  | 8.58735500  | 0.48403200  |
| H | 2.92444300  | 9.08929600  | 0.73604800  |
| H | 1.23543600  | 7.35920000  | 0.20193100  |
| O | 0.87160500  | 1.90051100  | -1.02530900 |
| O | 0.33895100  | 1.72079000  | 1.18592600  |
| H | 0.68533200  | 5.24509400  | -0.87547400 |
| H | 1.81438500  | 1.61580400  | -0.88490000 |
| C | 3.68132900  | 1.01095400  | 0.84366900  |
| O | 3.44696500  | 1.35422300  | -0.31543100 |
| O | 2.79852700  | 0.97749700  | 1.82460500  |
| H | 1.83797300  | 1.23825100  | 1.54588100  |
| C | 5.07024800  | 0.58205200  | 1.28358100  |
| H | 5.25076200  | 0.95920800  | 2.29619900  |
| H | 5.06160100  | -0.51284300 | 1.36865800  |
| C | 6.18113100  | 1.02678200  | 0.31684800  |
| H | 5.94429200  | 0.65314200  | -0.68449900 |
| H | 6.17506000  | 2.12112100  | 0.24716500  |
| C | 7.54786400  | 0.54313500  | 0.75388500  |
| C | 8.03161600  | -0.70760600 | 0.34502400  |
| C | 8.34955500  | 1.31959900  | 1.60205500  |
| C | 9.27655200  | -1.17165500 | 0.77262200  |
| H | 7.42733900  | -1.32150100 | -0.32012800 |
| C | 9.59579300  | 0.86106700  | 2.03240800  |

|   |             |             |            |
|---|-------------|-------------|------------|
| H | 7.99433700  | 2.29657100  | 1.92388000 |
| C | 10.06343100 | -0.38798400 | 1.61922600 |
| H | 9.63413000  | -2.14302000 | 0.44039700 |
| H | 10.20305000 | 1.48150400  | 2.68668100 |
| H | 11.03478500 | -0.74581400 | 1.95023900 |

### TS3

|   |             |             |             |
|---|-------------|-------------|-------------|
| C | 0.30486700  | -2.07038400 | -2.71117800 |
| C | -0.96415200 | -1.54761800 | -2.97248200 |
| H | -1.46073000 | -0.92814000 | -2.23706500 |
| C | -1.61267800 | -1.80919100 | -4.19264900 |
| C | -0.96770900 | -2.60829000 | -5.13742700 |
| H | -1.46127800 | -2.80803900 | -6.08760400 |
| C | 0.29959300  | -3.15831000 | -4.89727700 |
| C | 0.92510600  | -2.88058600 | -3.68140600 |
| H | 1.90743400  | -3.30033600 | -3.49251600 |
| C | -2.98400300 | -1.23667400 | -4.46612300 |
| H | -3.22335500 | -1.26836300 | -5.53448800 |
| H | -3.04705400 | -0.20234000 | -4.11699700 |
| H | -3.76258700 | -1.80401300 | -3.93830900 |
| C | 0.97424500  | -4.01983800 | -5.94118400 |
| H | 0.34115800  | -4.86711500 | -6.23309800 |
| H | 1.92381600  | -4.42223600 | -5.57394900 |
| H | 1.18615800  | -3.44940000 | -6.85473500 |
| C | 2.90829300  | -1.93444700 | -1.62293900 |
| C | 3.68134700  | -3.06540600 | -1.32594900 |
| H | 3.28670800  | -3.83463800 | -0.67127700 |
| C | 4.95547000  | -3.23573500 | -1.88040200 |
| C | 5.45425300  | -2.24196600 | -2.73165200 |
| H | 6.44233900  | -2.36609000 | -3.17216300 |
| C | 4.70856200  | -1.09972200 | -3.04466300 |
| C | 3.43267400  | -0.96047400 | -2.48237300 |
| H | 2.83373800  | -0.09174700 | -2.73863800 |
| C | 5.75558900  | -4.48846800 | -1.60101800 |
| H | 5.45591600  | -4.95100100 | -0.65507000 |
| H | 6.82959000  | -4.27804000 | -1.55182400 |
| H | 5.60847400  | -5.23702400 | -2.39117700 |
| C | 5.25721600  | -0.04503500 | -3.97857600 |
| H | 6.21481900  | -0.35432200 | -4.40995200 |
| H | 5.41241700  | 0.90649700  | -3.45663700 |
| H | 4.56433900  | 0.15004000  | -4.80624900 |
| C | 0.82765900  | -3.32378600 | -0.14529600 |
| C | -0.02143100 | -4.32204800 | -0.63625000 |
| H | -0.50257100 | -4.19713500 | -1.60081400 |

|   |             |             |             |    |             |             |             |
|---|-------------|-------------|-------------|----|-------------|-------------|-------------|
| C | -0.26177700 | -5.49282800 | 0.09796000  | H  | 3.59091100  | 4.58602300  | -4.04447700 |
| C | 0.36676400  | -5.64543500 | 1.33680800  | H  | 2.11939700  | 3.64377400  | -3.73243700 |
| H | 0.19046900  | -6.55193400 | 1.91394700  | H  | 3.49713800  | 2.89427900  | -4.54120800 |
| C | 1.21741800  | -4.66008800 | 1.85772800  | C  | 3.52906600  | -0.14022900 | 1.72340900  |
| C | 1.43326400  | -3.49875900 | 1.10988300  | C  | 4.67382500  | -0.66825800 | 1.10233300  |
| H | 2.07227100  | -2.72011800 | 1.51556300  | H  | 4.91057800  | -0.39841300 | 0.07895600  |
| C | -1.15624800 | -6.57640200 | -0.46166100 | C  | 5.53689600  | -1.52942900 | 1.78809900  |
| H | -1.51623800 | -7.24597900 | 0.32664500  | C  | 5.22424600  | -1.88748800 | 3.10612900  |
| H | -0.62275000 | -7.19359300 | -1.19699800 | H  | 5.89209100  | -2.55499900 | 3.64858600  |
| H | -2.02821600 | -6.15225900 | -0.97209400 | C  | 4.08224600  | -1.39783200 | 3.74448400  |
| C | 1.85898100  | -4.83245900 | 3.21606600  | C  | 3.24309300  | -0.52338200 | 3.04000800  |
| H | 2.80510500  | -4.28561300 | 3.28054700  | H  | 2.36746000  | -0.13018500 | 3.54322200  |
| H | 2.05599700  | -5.88765400 | 3.43603300  | C  | 3.76079000  | -1.77191300 | 5.17431400  |
| C | 2.01468200  | 2.27270900  | 2.17682400  | H  | 3.80122400  | -0.89520900 | 5.83304000  |
| C | 1.02177100  | 1.95352800  | 3.11555200  | H  | 4.46780100  | -2.51211500 | 5.56274400  |
| H | 0.46889400  | 1.02333800  | 3.02274000  | H  | 2.75184500  | -2.19244600 | 5.26085200  |
| C | 0.70036800  | 2.83171000  | 4.15730100  | C  | 6.80387100  | -2.03827400 | 1.13873900  |
| C | 1.38236600  | 4.04919300  | 4.24302900  | H  | 7.69105900  | -1.55798500 | 1.57272400  |
| H | 1.13555200  | 4.74142200  | 5.04666700  | H  | 6.80762000  | -1.83843600 | 0.06370500  |
| C | 2.36505500  | 4.40496000  | 3.31249100  | H  | 6.92240600  | -3.11879200 | 1.28271700  |
| C | 2.67089300  | 3.50768800  | 2.28231100  | Ru | 0.35035700  | 0.13836600  | 0.08757000  |
| H | 3.42700000  | 3.78921000  | 1.55781700  | P  | 1.14043200  | -1.75268300 | -1.08124800 |
| C | -0.39802700 | 2.48423200  | 5.13667400  | P  | 2.38731900  | 1.03309400  | 0.83496400  |
| H | -1.38670500 | 2.70435100  | 4.71278400  | H  | 1.20656300  | -4.45041900 | 4.01286700  |
| H | -0.30380700 | 3.05634200  | 6.06582800  | H  | 0.75002800  | 3.06900400  | -0.20503900 |
| H | -0.38701800 | 1.41844300  | 5.39073300  | C  | -1.28381600 | -1.32272000 | 1.39430900  |
| C | 3.09708700  | 5.72322900  | 3.43123400  | C  | -2.22968500 | -2.11272700 | 2.27077300  |
| H | 3.85235900  | 5.69107700  | 4.22804100  | C  | -3.69196400 | -2.06066200 | 1.79097300  |
| H | 2.41058600  | 6.54303600  | 3.67235800  | C  | -4.63076100 | -2.82481300 | 2.70023200  |
| H | 3.61367900  | 5.97902000  | 2.50037600  | C  | -4.78096200 | -4.21384000 | 2.57482700  |
| C | 3.51144400  | 1.96432200  | -0.30549000 | C  | -5.62608900 | -4.92529300 | 3.42718500  |
| C | 4.81362100  | 2.34658900  | 0.05879700  | C  | -6.34117100 | -4.25695000 | 4.42386900  |
| H | 5.22120100  | 2.03736100  | 1.01685800  | C  | -6.20369300 | -2.87444100 | 4.55908900  |
| C | 5.60103000  | 3.13182300  | -0.78971400 | C  | -5.35559800 | -2.16751000 | 3.70405300  |
| C | 5.05823900  | 3.54228300  | -2.01547200 | H  | -1.86738500 | -3.14957500 | 2.29512800  |
| H | 5.65637400  | 4.16913200  | -2.67562100 | H  | -2.13642100 | -1.73586900 | 3.29617200  |
| C | 3.76862600  | 3.17229700  | -2.41019100 | H  | -4.00151900 | -1.01185300 | 1.72161700  |
| C | 3.00363800  | 2.37557300  | -1.54490900 | H  | -4.23261600 | -4.74046700 | 1.79610900  |
| H | 1.99806500  | 2.08093700  | -1.83710500 | H  | -5.73134300 | -6.00098400 | 3.30965800  |
| C | 7.00803900  | 3.52591400  | -0.39963700 | H  | -7.00334200 | -4.80871500 | 5.08590300  |
| H | 7.18395900  | 3.37325300  | 0.66994100  | H  | -6.76028600 | -2.34363100 | 5.32734000  |
| H | 7.20726200  | 4.57921200  | -0.62839700 | H  | -5.25736000 | -1.08928100 | 3.81215000  |
| H | 7.75399000  | 2.93166100  | -0.94386000 | O  | -0.10860200 | -1.04042000 | 1.82160400  |
| C | 3.21290300  | 3.60086800  | -3.74979100 | O  | -1.62155700 | -0.93383600 | 0.23518600  |

|   |              |             |             |
|---|--------------|-------------|-------------|
| H | -3.73854500  | -2.46385200 | 0.77352900  |
| C | -0.24680900  | 2.70155600  | -0.46844800 |
| C | -1.10600400  | 3.89098700  | -0.90140100 |
| C | -1.22879800  | 4.95796300  | 0.20482000  |
| C | -2.13118500  | 6.10570200  | -0.19595500 |
| C | -3.52462500  | 5.93888400  | -0.20261500 |
| C | -4.36886100  | 6.97987700  | -0.58858500 |
| C | -3.83384300  | 8.21149200  | -0.97583500 |
| C | -2.44989800  | 8.39053400  | -0.97387800 |
| C | -1.60848800  | 7.34471200  | -0.58684900 |
| H | -0.63280200  | 4.32592700  | -1.79105900 |
| H | -2.10056500  | 3.55701100  | -1.20229800 |
| H | -1.62052400  | 4.47763200  | 1.10867300  |
| H | -3.94464800  | 4.98084600  | 0.09788200  |
| H | -5.44594300  | 6.83179500  | -0.58329500 |
| H | -4.49094600  | 9.02438600  | -1.27386600 |
| H | -2.02312900  | 9.34551400  | -1.27068300 |
| H | -0.53041200  | 7.49300600  | -0.58366200 |
| O | -0.72389400  | 2.04880000  | 0.73431800  |
| O | -0.13342000  | 1.68492800  | -1.43429900 |
| H | -0.23126800  | 5.33697400  | 0.46207500  |
| H | -1.70237000  | 1.86541400  | 0.56951800  |
| C | -3.37639500  | 1.20880300  | -1.13569800 |
| O | -3.23624400  | 1.65694400  | 0.01819300  |
| O | -2.44945400  | 1.14725600  | -2.04301700 |
| H | -1.32612300  | 1.40810700  | -1.74314700 |
| C | -4.72820700  | 0.66123600  | -1.57760700 |
| H | -4.89157500  | 0.92372800  | -2.62839200 |
| H | -4.64592400  | -0.43428700 | -1.55046800 |
| C | -5.90597400  | 1.11843700  | -0.69962900 |
| H | -5.66098700  | 0.91101800  | 0.34664500  |
| H | -6.00994100  | 2.20756100  | -0.78129400 |
| C | -7.20713900  | 0.44334300  | -1.07850000 |
| C | -7.60674000  | -0.74553800 | -0.45151700 |
| C | -8.03024900  | 0.97203000  | -2.08292600 |
| C | -8.78975400  | -1.38944700 | -0.81838600 |
| H | -6.98760700  | -1.16689600 | 0.33806900  |
| C | -9.21440500  | 0.33265000  | -2.45349200 |
| H | -7.74114600  | 1.89838900  | -2.57563100 |
| C | -9.59823800  | -0.85243900 | -1.82227500 |
| H | -9.08224000  | -2.30754900 | -0.31495600 |
| H | -9.83963900  | 0.76272200  | -3.23210700 |
| H | -10.52177800 | -1.34995700 | -2.10678700 |

### Int5

|   |             |             |             |
|---|-------------|-------------|-------------|
| C | -0.56294400 | -2.02724400 | 2.75087600  |
| C | 0.72005600  | -1.54976600 | 3.04035200  |
| H | 1.26936500  | -0.96288700 | 2.31428000  |
| C | 1.32403200  | -1.81998500 | 4.28089800  |
| C | 0.61965200  | -2.57741100 | 5.21899700  |
| H | 1.07805200  | -2.78253600 | 6.18563000  |
| C | -0.66131600 | -3.07967100 | 4.95159300  |
| C | -1.24191400 | -2.79663500 | 3.71408700  |
| H | -2.23518200 | -3.17917400 | 3.50366300  |
| C | 2.71434200  | -1.30824600 | 4.57930600  |
| H | 2.86013100  | -1.15670900 | 5.65482100  |
| H | 2.90068500  | -0.36821700 | 4.05272200  |
| H | 3.47598500  | -2.02713100 | 4.24647600  |
| C | -1.39916900 | -3.89657200 | 5.98877000  |
| H | -0.80920100 | -4.76368900 | 6.31101300  |
| H | -2.35384600 | -4.26652400 | 5.60119800  |
| H | -1.61277000 | -3.30348300 | 6.88735100  |
| C | -3.13765400 | -1.78096800 | 1.59250800  |
| C | -3.95699100 | -2.87639000 | 1.28700100  |
| H | -3.57837700 | -3.67921900 | 0.66369600  |
| C | -5.25995000 | -2.96657100 | 1.79192000  |
| C | -5.73828100 | -1.92916400 | 2.60144200  |
| H | -6.74884300 | -1.99071300 | 3.00209200  |
| C | -4.94498400 | -0.82175800 | 2.92386600  |
| C | -3.64242900 | -0.76245000 | 2.41149400  |
| H | -3.00837600 | 0.07964300  | 2.67310100  |
| C | -6.11354800 | -4.18201600 | 1.50580900  |
| H | -5.83531200 | -4.65195200 | 0.55687400  |
| H | -7.17748000 | -3.92542900 | 1.45951900  |
| H | -5.99729800 | -4.94087900 | 2.29124500  |
| C | -5.47461100 | 0.28046900  | 3.81255900  |
| H | -6.45099100 | 0.01844900  | 4.23285100  |
| H | -5.58629700 | 1.21953400  | 3.25780600  |
| H | -4.79205200 | 0.47782700  | 4.64806000  |
| C | -1.09130800 | -3.27484300 | 0.17152500  |
| C | -0.31884800 | -4.32175100 | 0.68690900  |
| H | 0.13395900  | -4.22798300 | 1.66865500  |
| C | -0.11833800 | -5.49990900 | -0.04719600 |
| C | -0.70827000 | -5.60942000 | -1.30955600 |
| H | -0.56090200 | -6.52086700 | -1.88701600 |
| C | -1.48230900 | -4.57497600 | -1.85439000 |
| C | -1.66025400 | -3.40770200 | -1.10573400 |
| H | -2.23800700 | -2.59071200 | -1.52720200 |

|   |             |             |             |    |             |             |             |
|---|-------------|-------------|-------------|----|-------------|-------------|-------------|
| C | 0.69435000  | -6.63488700 | 0.53470000  | C  | -5.48423900 | -1.29028900 | -2.02500900 |
| H | 1.05654800  | -7.31043700 | -0.24746700 | C  | -5.13407600 | -1.60561200 | -3.34511700 |
| H | 0.09747700  | -7.23489700 | 1.23469800  | H  | -5.79230300 | -2.24544200 | -3.93092600 |
| H | 1.56180400  | -6.26197900 | 1.09049900  | C  | -3.96818000 | -1.10737000 | -3.93108100 |
| C | -2.08026200 | -4.70347600 | -3.23726900 | C  | -3.14318100 | -0.26560600 | -3.17187800 |
| H | -2.97636400 | -4.08350400 | -3.34169500 | H  | -2.25007700 | 0.13830000  | -3.63429300 |
| H | -2.35135400 | -5.74102200 | -3.46262000 | C  | -3.60022400 | -1.44506900 | -5.35852500 |
| C | -1.81003000 | 2.42663700  | -2.16449200 | H  | -2.64263900 | -1.97783600 | -5.40876000 |
| C | -0.76611800 | 2.07841600  | -3.03428400 | H  | -3.49544200 | -0.53890700 | -5.96769400 |
| H | -0.27440900 | 1.11632400  | -2.92922900 | H  | -4.35992200 | -2.07794500 | -5.82846100 |
| C | -0.32082900 | 2.96544600  | -4.02236700 | C  | -6.77610900 | -1.80748000 | -1.43409000 |
| C | -0.93172100 | 4.21863700  | -4.12255800 | H  | -7.64444300 | -1.30645000 | -1.88242300 |
| H | -0.58707700 | 4.91812700  | -4.88255600 | H  | -6.81434600 | -1.64110300 | -0.35407400 |
| C | -1.96642600 | 4.60163600  | -3.26096100 | H  | -6.89798000 | -2.88195800 | -1.61584400 |
| C | -2.39511900 | 3.69640800  | -2.28349500 | Ru | -0.40943100 | 0.15760400  | -0.01935700 |
| H | -3.19021200 | 3.99651000  | -1.60985300 | P  | -1.34919000 | -1.69434800 | 1.10182000  |
| C | 0.82945600  | 2.58202700  | -4.92544300 | P  | -2.33757000 | 1.18583000  | -0.87777900 |
| H | 1.78415100  | 2.62988800  | -4.38583100 | H  | -1.36767500 | -4.37948800 | -4.00784800 |
| H | 0.90299900  | 3.25114100  | -5.78908000 | H  | -0.56085600 | 3.14341900  | 0.24280000  |
| H | 0.72249400  | 1.55691400  | -5.29844600 | C  | 1.15886600  | -1.38956500 | -1.28606800 |
| C | -2.62145900 | 5.95795200  | -3.39823100 | C  | 2.08201800  | -2.19984100 | -2.16503100 |
| H | -3.34034900 | 5.97235100  | -4.22856000 | C  | 3.53244300  | -2.23140300 | -1.64711000 |
| H | -1.88233600 | 6.74181100  | -3.59935900 | C  | 4.46326100  | -2.98492200 | -2.57299200 |
| H | -3.16635500 | 6.23299800  | -2.48918200 | C  | 4.56037600  | -4.38301300 | -2.51441400 |
| C | -3.49541200 | 2.16037300  | 0.19031500  | C  | 5.39908300  | -5.08240700 | -3.38294400 |
| C | -4.76341100 | 2.57083200  | -0.25591000 | C  | 6.16113900  | -4.39255100 | -4.32889700 |
| H | -5.12182800 | 2.25476500  | -1.23100500 | C  | 6.07703000  | -3.00090100 | -4.39726100 |
| C | -5.57579600 | 3.39294100  | 0.53090800  | C  | 5.23480900  | -2.30586100 | -3.52658600 |
| C | -5.09341300 | 3.81275300  | 1.77923400  | H  | 1.67025500  | -3.21632700 | -2.23092800 |
| H | -5.71109400 | 4.46752200  | 2.39238700  | H  | 2.03305600  | -1.78591000 | -3.17899200 |
| C | -3.84030100 | 3.41636000  | 2.25498700  | H  | 3.87767300  | -1.20023400 | -1.51464000 |
| C | -3.04986100 | 2.58227800  | 1.44898000  | H  | 3.97622000  | -4.92655300 | -1.77432000 |
| H | -2.07507300 | 2.26579100  | 1.80939900  | H  | 5.46301700  | -6.16573300 | -3.31717300 |
| C | -6.94494700 | 3.82097200  | 0.05253000  | H  | 6.81870700  | -4.93507400 | -5.00306300 |
| H | -7.08562900 | 3.59718700  | -1.00958300 | H  | 6.67072600  | -2.45381600 | -5.12525600 |
| H | -7.10064000 | 4.89680600  | 0.19499600  | H  | 5.17760500  | -1.22075400 | -3.58241800 |
| H | -7.73984800 | 3.30504600  | 0.60687000  | O  | 0.02430300  | -0.99486800 | -1.74420400 |
| C | -3.35046900 | 3.85380400  | 3.61703100  | O  | 1.46658800  | -1.07979600 | -0.09810200 |
| H | -3.79333700 | 4.81049400  | 3.91379600  | H  | 3.53704700  | -2.68827400 | -0.65159100 |
| H | -2.26101500 | 3.95993100  | 3.63525500  | C  | 0.39012000  | 2.69948100  | 0.54452200  |
| H | -3.61567800 | 3.11828900  | 4.38829300  | C  | 1.34096000  | 3.78590000  | 1.03927900  |
| C | -3.46452700 | 0.07085900  | -1.85128800 | C  | 1.71461700  | 4.78545300  | -0.07449200 |
| C | -4.63375400 | -0.46435000 | -1.28315800 | C  | 2.79012500  | 5.75651700  | 0.36477800  |
| H | -4.89970200 | -0.22519400 | -0.25921300 | C  | 4.12509500  | 5.33090100  | 0.44650800  |



|            |             |             |             |   |             |             |             |
|------------|-------------|-------------|-------------|---|-------------|-------------|-------------|
| C          | 5.12778000  | 6.20349500  | 0.86871200  | H | 0.90109600  | -2.67098300 | 6.29059100  |
| C          | 4.81310600  | 7.52003500  | 1.21704900  | C | -0.84328500 | -2.92503200 | 5.05408300  |
| C          | 3.48937500  | 7.95472300  | 1.13950700  | C | -1.39764000 | -2.66967000 | 3.79801500  |
| C          | 2.48774100  | 7.07749800  | 0.71603600  | H | -2.40863800 | -3.00722900 | 3.59595000  |
| H          | 0.84368500  | 4.31019800  | 1.86531200  | C | 2.63288400  | -1.37396800 | 4.63123800  |
| H          | 2.24287400  | 3.32828700  | 1.44854000  | H | 2.78986100  | -1.20967600 | 5.70318200  |
| H          | 2.06660000  | 4.21903200  | -0.94356100 | H | 2.87041400  | -0.45433400 | 4.08917600  |
| H          | 4.36908000  | 4.30512500  | 0.17655200  | H | 3.35348300  | -2.13938000 | 4.31096800  |
| H          | 6.15702200  | 5.85745400  | 0.92254900  | C | -1.63560700 | -3.64622100 | 6.12169500  |
| H          | 5.59458100  | 8.20119600  | 1.54385100  | H | -1.08580500 | -4.51042100 | 6.51455100  |
| H          | 3.23478900  | 8.97775200  | 1.40562100  | H | -2.59368500 | -4.00649400 | 5.73350200  |
| H          | 1.45793600  | 7.42391600  | 0.65362100  | H | -1.84913400 | -2.98828000 | 6.97408600  |
| O          | 0.86602100  | 1.95316600  | -0.56184800 | C | -3.21579600 | -1.73621800 | 1.57591600  |
| O          | 0.07105900  | 1.72503900  | 1.56524900  | C | -4.03317800 | -2.83936700 | 1.28931200  |
| H          | 0.81959700  | 5.33312600  | -0.39715100 | H | -3.63974400 | -3.66996400 | 0.71355400  |
| H          | 1.87163600  | 1.70552100  | -0.36206000 | C | -5.35269300 | -2.90063900 | 1.75160300  |
| C          | 3.42371700  | 0.96292600  | 1.18049400  | C | -5.85055100 | -1.82776600 | 2.50240200  |
| O          | 3.27448900  | 1.40777500  | -0.00021500 | H | -6.87454300 | -1.86652200 | 2.87078100  |
| O          | 2.54681700  | 0.98233300  | 2.09613200  | C | -5.06060700 | -0.71375300 | 2.80583400  |
| H          | 0.98993300  | 1.39934600  | 1.88227200  | C | -3.74086400 | -0.68223300 | 2.33398700  |
| C          | 4.77363000  | 0.32924900  | 1.52808400  | H | -3.11262000 | 0.16929300  | 2.57883100  |
| H          | 4.96800400  | 0.47934500  | 2.59522900  | C | -6.21063500 | -4.11712800 | 1.48319500  |
| H          | 4.65523000  | -0.75484900 | 1.38895600  | H | -5.79952500 | -4.72436100 | 0.67056800  |
| C          | 5.95529900  | 0.82938200  | 0.67718000  | H | -7.23508600 | -3.83692900 | 1.21246800  |
| H          | 5.68926100  | 0.72986000  | -0.37947600 | H | -6.27677600 | -4.75907900 | 2.37171300  |
| H          | 6.09685400  | 1.90242200  | 0.86034200  | C | -5.61030400 | 0.42524400  | 3.63394500  |
| C          | 7.24024300  | 0.08463200  | 0.97130800  | H | -6.61758800 | 0.20112200  | 3.99981200  |
| C          | 7.59961700  | -1.05084500 | 0.23072400  | H | -5.66011600 | 1.35298900  | 3.05222600  |
| C          | 8.08769600  | 0.49041400  | 2.01235100  | H | -4.97450700 | 0.62401800  | 4.50552700  |
| C          | 8.76571000  | -1.76084600 | 0.52257500  | C | -1.15299000 | -3.28132700 | 0.24238300  |
| H          | 6.96120100  | -1.38010800 | -0.58682700 | C | -0.42575200 | -4.33685100 | 0.80539400  |
| C          | 9.25500200  | -0.21524200 | 2.30842600  | H | -0.00926400 | -4.23507400 | 1.80237400  |
| H          | 7.82963300  | 1.37290100  | 2.59474300  | C | -0.22540000 | -5.53209900 | 0.10073200  |
| C          | 9.59830700  | -1.34574100 | 1.56384200  | C | -0.76869200 | -5.65083600 | -1.18237600 |
| H          | 9.02559900  | -2.63597100 | -0.06798000 | H | -0.62068900 | -6.57557400 | -1.73829200 |
| H          | 9.89867800  | 0.12041900  | 3.11798200  | C | -1.49613800 | -4.60926200 | -1.77413100 |
| H          | 10.50853200 | -1.89517900 | 1.79016000  | C | -1.67536800 | -3.42435300 | -1.05274100 |
|            |             |             |             | H | -2.21677600 | -2.60189700 | -1.50993600 |
| <b>TS4</b> |             |             |             | C | 0.53318200  | -6.67783000 | 0.73259200  |
| C          | -0.67037900 | -1.98580400 | 2.80682400  | H | 1.00321400  | -7.31414000 | -0.02508200 |
| C          | 0.63584100  | -1.56840000 | 3.08888100  | H | -0.13308400 | -7.31787300 | 1.32679700  |
| H          | 1.22118000  | -1.05266600 | 2.33750600  | H | 1.31719100  | -6.31536000 | 1.40608200  |
| C          | 1.21564900  | -1.81466600 | 4.34503800  | C | -2.04313300 | -4.74718200 | -3.17712300 |
| C          | 0.46219300  | -2.48513300 | 5.31111400  | H | -2.93627000 | -4.12979500 | -3.31735900 |

|   |             |             |             |    |             |             |             |
|---|-------------|-------------|-------------|----|-------------|-------------|-------------|
| H | -2.30338700 | -5.78653900 | -3.40650000 | C  | -3.38898600 | -1.47449400 | -5.41640800 |
| C | -1.68512900 | 2.42529700  | -2.20220400 | H  | -2.57881000 | -2.21521000 | -5.41042900 |
| C | -0.60439800 | 2.06179100  | -3.01862300 | H  | -3.02027400 | -0.59913500 | -5.96301500 |
| H | -0.12261500 | 1.10018800  | -2.87596800 | H  | -4.22208500 | -1.90173200 | -5.98421800 |
| C | -0.11437000 | 2.93255300  | -3.99989600 | C  | -6.68941000 | -1.79816400 | -1.59371900 |
| C | -0.71668700 | 4.18543400  | -4.14591100 | H  | -7.54534100 | -1.29714000 | -2.06542400 |
| H | -0.33651600 | 4.87248300  | -4.90039200 | H  | -6.75639900 | -1.63091100 | -0.51514400 |
| C | -1.78787700 | 4.58351900  | -3.33717300 | H  | -6.80642400 | -2.87276400 | -1.77788700 |
| C | -2.26154900 | 3.69382900  | -2.36623000 | Ru | -0.40056800 | 0.15298900  | 0.01320900  |
| H | -3.08505100 | 4.00507400  | -1.73296400 | P  | -1.41332900 | -1.67658200 | 1.13066100  |
| C | 1.07322900  | 2.53297400  | -4.84594500 | P  | -2.27197500 | 1.20296100  | -0.92330500 |
| H | 2.00297100  | 2.58242700  | -4.26452800 | H  | -1.30383400 | -4.42487600 | -3.92293200 |
| H | 1.18845500  | 3.19138400  | -5.71330500 | H  | -0.50793400 | 3.12436700  | 0.20721300  |
| H | 0.97760300  | 1.50390800  | -5.21117300 | C  | 1.16368400  | -1.45494600 | -1.20000700 |
| C | -2.43409000 | 5.93801400  | -3.52508000 | C  | 2.06983100  | -2.31557200 | -2.05005300 |
| H | -3.13492700 | 5.93283400  | -4.37092300 | C  | 3.52137600  | -2.35429700 | -1.53588400 |
| H | -1.68764700 | 6.71367900  | -3.73073600 | C  | 4.43503000  | -3.16346800 | -2.43128300 |
| H | -2.99784200 | 6.23920400  | -2.63594800 | C  | 4.52253800  | -4.55714500 | -2.30014200 |
| C | -3.46432800 | 2.20294700  | 0.08358900  | C  | 5.34547200  | -5.30791700 | -3.14053900 |
| C | -4.71653100 | 2.60251600  | -0.41496100 | C  | 6.10079800  | -4.67521400 | -4.13074100 |
| H | -5.04268700 | 2.26002500  | -1.39230500 | C  | 6.02577000  | -3.28847600 | -4.27181600 |
| C | -5.55306500 | 3.44592700  | 0.32205600  | C  | 5.19941100  | -2.54203000 | -3.42898100 |
| C | -5.11249200 | 3.89684800  | 1.57533600  | H  | 1.64090600  | -3.32691700 | -2.07184000 |
| H | -5.75015800 | 4.56585700  | 2.15169700  | H  | 2.02467100  | -1.94262900 | -3.07966400 |
| C | -3.87678500 | 3.51191800  | 2.10235300  | H  | 3.88738100  | -1.32522400 | -1.44956100 |
| C | -3.06074700 | 2.65700500  | 1.34483900  | H  | 3.94298700  | -5.05626800 | -1.52599500 |
| H | -2.09974600 | 2.34889000  | 1.74625000  | H  | 5.40206900  | -6.38675900 | -3.01848800 |
| C | -6.89988700 | 3.87271800  | -0.21716100 | H  | 6.74575800  | -5.25790400 | -4.78320200 |
| H | -7.06531500 | 3.48923600  | -1.22877200 | H  | 6.61381400  | -2.78532700 | -5.03523700 |
| H | -6.98815100 | 4.96551500  | -0.25373700 | H  | 5.14814000  | -1.46107300 | -3.54270400 |
| H | -7.71792600 | 3.50598500  | 0.41579200  | O  | 0.05649100  | -1.02528500 | -1.68871400 |
| C | -3.43255800 | 3.98202200  | 3.46916400  | O  | 1.45895700  | -1.14512700 | -0.00902500 |
| H | -3.89312200 | 4.94016000  | 3.73254500  | H  | 3.52039100  | -2.76871700 | -0.52196600 |
| H | -2.34515200 | 4.09971000  | 3.51754400  | C  | 0.42891100  | 2.65998300  | 0.53266700  |
| H | -3.71351200 | 3.25980500  | 4.24745700  | C  | 1.37582200  | 3.74612900  | 1.04212500  |
| C | -3.37095300 | 0.08487200  | -1.92456200 | C  | 1.82002600  | 4.69365400  | -0.09141500 |
| C | -4.55564600 | -0.44850600 | -1.38856300 | C  | 2.80556000  | 5.73917700  | 0.38503600  |
| H | -4.85378800 | -0.20076700 | -0.37563500 | C  | 4.16206100  | 5.41343600  | 0.53378200  |
| C | -5.38160100 | -1.28220900 | -2.14982700 | C  | 5.07899000  | 6.35641400  | 0.99848300  |
| C | -4.99155100 | -1.60522800 | -3.45649200 | C  | 4.65456200  | 7.64758300  | 1.32272400  |
| H | -5.63181400 | -2.24874000 | -4.05815900 | C  | 3.30812600  | 7.98544700  | 1.17745700  |
| C | -3.80818900 | -1.10957800 | -4.01003800 | C  | 2.39385700  | 7.03737300  | 0.71244800  |
| C | -3.00895700 | -0.26031000 | -3.23269500 | H  | 0.84757700  | 4.31344800  | 1.81923600  |
| H | -2.10285200 | 0.14301200  | -3.66959700 | H  | 2.25035000  | 3.29554100  | 1.51681000  |

|                  |             |             |             |   |             |             |             |
|------------------|-------------|-------------|-------------|---|-------------|-------------|-------------|
| H                | 2.27366700  | 4.09191900  | -0.88618900 | H | 2.90014900  | -0.56516600 | 4.07572500  |
| H                | 4.49511200  | 4.40929600  | 0.27824700  | H | 3.31593100  | -2.27664100 | 4.21113100  |
| H                | 6.12665100  | 6.08529300  | 1.10301300  | C | -1.73157300 | -3.48656500 | 6.18190300  |
| H                | 5.36832800  | 8.38437200  | 1.68199800  | H | -1.16642600 | -4.26735100 | 6.70454200  |
| H                | 2.96835200  | 8.98876600  | 1.42262800  | H | -2.64510300 | -3.94014700 | 5.78382400  |
| H                | 1.34633000  | 7.30928600  | 0.59770400  | H | -2.03302000 | -2.74837400 | 6.93705600  |
| O                | 0.92498400  | 1.86123800  | -0.49351000 | C | -3.25784900 | -1.73128500 | 1.56387200  |
| O                | 0.02549600  | 1.73206900  | 1.59888700  | C | -4.06526200 | -2.83966100 | 1.27415000  |
| H                | 0.93813700  | 5.17902500  | -0.52941800 | H | -3.66008500 | -3.67128400 | 0.70787300  |
| H                | 2.08328900  | 1.56326900  | -0.24371500 | C | -5.39175000 | -2.90470100 | 1.71847100  |
| C                | 3.42983800  | 0.88164800  | 1.19869800  | C | -5.90460000 | -1.83103800 | 2.45610800  |
| O                | 3.23517400  | 1.28383800  | -0.01297600 | H | -6.93368200 | -1.87218800 | 2.80937200  |
| O                | 2.58689400  | 0.93803200  | 2.12148000  | C | -5.12371200 | -0.71062000 | 2.76375300  |
| H                | 0.90001300  | 1.39059800  | 1.95359200  | C | -3.79934100 | -0.67420000 | 2.30779500  |
| C                | 4.80106300  | 0.27918400  | 1.48566400  | H | -3.18032600 | 0.18452800  | 2.55100000  |
| H                | 5.00807100  | 0.38735800  | 2.55487300  | C | -6.23526100 | -4.12978300 | 1.44341500  |
| H                | 4.71255500  | -0.79959900 | 1.29485700  | H | -7.30042200 | -3.88080500 | 1.38642400  |
| C                | 5.95355400  | 0.85323300  | 0.63895500  | H | -6.11902500 | -4.87779500 | 2.23927200  |
| H                | 5.68247900  | 0.77711100  | -0.41840600 | H | -5.94757900 | -4.61066500 | 0.50265400  |
| H                | 6.05875400  | 1.92374100  | 0.85745700  | C | -5.69054700 | 0.42909300  | 3.57943200  |
| C                | 7.26679700  | 0.14539600  | 0.89917100  | H | -6.71276200 | 0.21359200  | 3.90720500  |
| C                | 7.63485400  | -0.98302900 | 0.15215100  | H | -5.70881700 | 1.36155100  | 3.00374600  |
| C                | 8.13073900  | 0.57860600  | 1.91474300  | H | -5.08506000 | 0.61446900  | 4.47543800  |
| C                | 8.82727300  | -1.65994600 | 0.41372600  | C | -1.18349200 | -3.26820000 | 0.24747500  |
| H                | 6.98265100  | -1.33382700 | -0.64532000 | C | -0.48535500 | -4.33502800 | 0.82596800  |
| C                | 9.32471000  | -0.09415200 | 2.18008200  | H | -0.09364500 | -4.24105100 | 1.83373400  |
| H                | 7.86514600  | 1.45603000  | 2.50130300  | C | -0.28354900 | -5.53143200 | 0.12394700  |
| C                | 9.67711900  | -1.21782200 | 1.42979000  | C | -0.79585500 | -5.64016100 | -1.17282500 |
| H                | 9.09390600  | -2.53044200 | -0.18044800 | H | -0.64639600 | -6.56569300 | -1.72711100 |
| H                | 9.98138500  | 0.26195200  | 2.97008900  | C | -1.49490800 | -4.58798200 | -1.77971500 |
| H                | 10.60770100 | -1.74171100 | 1.63228300  | C | -1.67659500 | -3.40211900 | -1.06002900 |
| <b>Int5-acid</b> |             |             |             | H | -2.19729000 | -2.57215200 | -1.52761100 |
| C                | -0.71692600 | -1.97250200 | 2.81309200  | C | 0.44222900  | -6.68934000 | 0.77203900  |
| C                | 0.61280700  | -1.61604200 | 3.07231300  | H | 0.93105500  | -7.32502700 | 0.02571700  |
| H                | 1.21272700  | -1.15284900 | 2.29804300  | H | -0.24967500 | -7.32715600 | 1.33876400  |
| C                | 1.19536200  | -1.86471500 | 4.32609600  | H | 1.20690900  | -6.33991300 | 1.47405000  |
| C                | 0.42031900  | -2.47208700 | 5.31705500  | C | -2.00974800 | -4.71599900 | -3.19581100 |
| H                | 0.86207700  | -2.66004800 | 6.29474900  | H | -2.89110800 | -4.08671000 | -3.35600100 |
| C                | -0.90947600 | -2.84647100 | 5.08562000  | H | -2.27776800 | -5.75150600 | -3.43367400 |
| C                | -1.46479500 | -2.59443900 | 3.82858100  | C | -1.68493300 | 2.47692300  | -2.18004300 |
| H                | -2.49334600 | -2.88675300 | 3.64632900  | C | -0.59020100 | 2.13116600  | -2.98383400 |
| C                | 2.63836400  | -1.49670800 | 4.58548800  | H | -0.09446700 | 1.17799400  | -2.83564600 |
| H                | 2.83396900  | -1.38343300 | 5.65747900  | C | -0.10823100 | 3.00740000  | -3.96554000 |
|                  |             |             |             | C | -0.73121000 | 4.24785900  | -4.12203800 |

|   |             |             |             |    |             |             |             |
|---|-------------|-------------|-------------|----|-------------|-------------|-------------|
| H | -0.35941100 | 4.93705600  | -4.87897700 | H  | -6.74203300 | -1.63703000 | -0.57279000 |
| C | -1.81540000 | 4.63050900  | -3.32178600 | H  | -6.78857700 | -2.84821300 | -1.86540800 |
| C | -2.28302000 | 3.73480300  | -2.35479500 | Ru | -0.41961200 | 0.18363600  | 0.02859800  |
| H | -3.11984700 | 4.03220300  | -1.73270300 | P  | -1.45168200 | -1.66136300 | 1.13132600  |
| C | 1.08843600  | 2.62133400  | -4.80529400 | P  | -2.27300300 | 1.24172400  | -0.91353900 |
| H | 2.01103600  | 2.65197700  | -4.21140300 | H  | -1.24899300 | -4.40176900 | -3.92324700 |
| H | 1.21774400  | 3.29872100  | -5.65591800 | H  | -0.50730900 | 3.14793400  | 0.25159900  |
| H | 0.99254100  | 1.60141300  | -5.19580300 | C  | 1.14379400  | -1.42389800 | -1.20347300 |
| C | -2.46358600 | 5.98504500  | -3.50321400 | C  | 2.03366600  | -2.28993200 | -2.06757900 |
| H | -2.84783000 | 6.11262600  | -4.52321100 | C  | 3.47951100  | -2.38416600 | -1.54552400 |
| H | -1.74900800 | 6.79889200  | -3.32632000 | C  | 4.37469400  | -3.20657200 | -2.44752000 |
| H | -3.30140500 | 6.12227300  | -2.81203600 | C  | 4.41660200  | -4.60433300 | -2.34000400 |
| C | -3.47908500 | 2.22938300  | 0.09036600  | C  | 5.22371300  | -5.36633400 | -3.18567500 |
| C | -4.73163600 | 2.62204700  | -0.41271200 | C  | 6.00849600  | -4.74114700 | -4.15757300 |
| H | -5.05065700 | 2.28081000  | -1.39284900 | C  | 5.97855600  | -3.35052600 | -4.27528400 |
| C | -5.57766700 | 3.45723400  | 0.32298800  | C  | 5.16800600  | -2.59284300 | -3.42713100 |
| C | -5.14634400 | 3.90716300  | 1.57976100  | H  | 1.57596100  | -3.28741700 | -2.11769400 |
| H | -5.79118600 | 4.57019800  | 2.15507400  | H  | 2.00792600  | -1.89147100 | -3.08837000 |
| C | -3.91081400 | 3.52825800  | 2.11158400  | H  | 3.87796400  | -1.36898200 | -1.44057500 |
| C | -3.08514000 | 2.68167300  | 1.35530900  | H  | 3.81325400  | -5.09791200 | -1.58064400 |
| H | -2.12361200 | 2.37949800  | 1.75986200  | H  | 5.24469100  | -6.44838300 | -3.08214800 |
| C | -6.92591500 | 3.87419400  | -0.22045400 | H  | 6.64091600  | -5.33282900 | -4.81419700 |
| H | -7.07290000 | 3.51523800  | -1.24388100 | H  | 6.58913500  | -2.85336400 | -5.02483100 |
| H | -7.03439400 | 4.96568200  | -0.22817000 | H  | 5.15120100  | -1.50904200 | -3.52331300 |
| H | -7.74425700 | 3.47499200  | 0.39234900  | O  | 0.03998600  | -0.98041800 | -1.68447200 |
| C | -3.47633700 | 3.99620100  | 3.48226700  | O  | 1.45129700  | -1.12874800 | -0.01197500 |
| H | -3.95397000 | 4.94412100  | 3.75222300  | H  | 3.45800700  | -2.81533000 | -0.53868200 |
| H | -2.39116500 | 4.13279300  | 3.53241700  | C  | 0.43086100  | 2.65605800  | 0.54485100  |
| H | -3.74487500 | 3.26332600  | 4.25500400  | C  | 1.40440600  | 3.71627400  | 1.06165000  |
| C | -3.35736900 | 0.12505900  | -1.93300700 | C  | 1.83475100  | 4.68196100  | -0.06205100 |
| C | -4.54735100 | -0.41608800 | -1.41610500 | C  | 2.88762200  | 5.66946500  | 0.39334600  |
| H | -4.86125800 | -0.17295000 | -0.40682200 | C  | 4.24246200  | 5.30542700  | 0.40094600  |
| C | -5.35621600 | -1.25406200 | -2.19048200 | C  | 5.22198800  | 6.19415800  | 0.84508300  |
| C | -4.94342400 | -1.57439200 | -3.49114900 | C  | 4.86271600  | 7.46842300  | 1.29112800  |
| H | -5.56889100 | -2.22337100 | -4.10240200 | C  | 3.51829400  | 7.84416300  | 1.28804400  |
| C | -3.75500900 | -1.07088400 | -4.02561100 | C  | 2.54187900  | 6.95072800  | 0.84220800  |
| C | -2.97291000 | -0.21740800 | -3.23510700 | H  | 0.90986600  | 4.27445600  | 1.86719300  |
| H | -2.06045300 | 0.18893200  | -3.65590100 | H  | 2.28509700  | 3.23940700  | 1.49956500  |
| C | -3.31344100 | -1.42442500 | -5.42816100 | H  | 2.21915700  | 4.08783000  | -0.89813400 |
| H | -3.09676200 | -0.52499300 | -6.01684600 | H  | 4.52507400  | 4.31407500  | 0.05170500  |
| H | -4.08281100 | -1.99568400 | -5.95779600 | H  | 6.26704500  | 5.89422200  | 0.83830700  |
| H | -2.39782700 | -2.02910800 | -5.41687400 | H  | 5.62468400  | 8.16339100  | 1.63438500  |
| C | -6.66892500 | -1.77883900 | -1.65463600 | H  | 3.22872300  | 8.83520000  | 1.62889300  |
| H | -7.52059900 | -1.26374800 | -2.11909700 | H  | 1.49622800  | 7.25233300  | 0.83799900  |



|    |             |             |             |   |             |             |             |
|----|-------------|-------------|-------------|---|-------------|-------------|-------------|
| H  | -0.83895200 | -2.73473800 | -6.43690300 | H | 0.62907000  | -3.61487800 | -0.51831800 |
| H  | -1.15557200 | -1.16551600 | -5.67598900 | C | -2.16028200 | 0.66838000  | -1.13649700 |
| C  | 3.70416200  | -4.24366500 | -4.88257900 | C | -3.28439800 | 1.34859300  | -1.89038100 |
| H  | 3.93116500  | -4.09528600 | -5.94534800 | C | -4.46107200 | 1.76105300  | -0.98459100 |
| H  | 3.40373800  | -5.29296500 | -4.76227400 | C | -5.56624800 | 2.45088900  | -1.75507400 |
| H  | 4.63117600  | -4.10051800 | -4.31794600 | C | -5.55447000 | 3.84118800  | -1.93653700 |
| C  | 3.46536300  | -1.36929600 | -0.47195200 | C | -6.55379900 | 4.47848700  | -2.67392500 |
| C  | 4.74906000  | -1.04382000 | -0.93650400 | C | -7.58728500 | 3.73270600  | -3.24480500 |
| H  | 4.86808500  | -0.29661100 | -1.71533400 | C | -7.61289800 | 2.34741800  | -3.07055500 |
| C  | 5.88714500  | -1.67902000 | -0.42505900 | C | -6.61111400 | 1.71545000  | -2.33189800 |
| C  | 5.71870600  | -2.66114300 | 0.55977700  | H | -2.87034700 | 2.21463400  | -2.41707200 |
| H  | 6.59572700  | -3.17463500 | 0.95146700  | H | -3.63674900 | 0.65263700  | -2.66476000 |
| C  | 4.45295200  | -3.00043700 | 1.05106200  | H | -4.84499000 | 0.86667400  | -0.48333200 |
| C  | 3.33088600  | -2.34305400 | 0.52771300  | H | -4.75431600 | 4.42729500  | -1.48840900 |
| H  | 2.34340400  | -2.59470600 | 0.90308500  | H | -6.52806400 | 5.55826200  | -2.79889800 |
| C  | 7.26768200  | -1.30548000 | -0.91653400 | H | -8.36827200 | 4.22716800  | -3.81653600 |
| H  | 7.23188600  | -0.87591800 | -1.92301200 | H | -8.41629200 | 1.75823600  | -3.50574300 |
| H  | 7.93347000  | -2.17530100 | -0.94220300 | H | -6.64119300 | 0.63627700  | -2.19509800 |
| H  | 7.73493200  | -0.55894000 | -0.26033000 | O | -0.96496100 | 0.75948700  | -1.59196200 |
| C  | 4.29769800  | -4.03846200 | 2.13967000  | O | -2.37385200 | 0.00605500  | -0.08236000 |
| H  | 5.07642700  | -4.80632400 | 2.07560000  | H | -4.08334100 | 2.42440000  | -0.19773200 |
| H  | 3.32353600  | -4.53450700 | 2.08206900  | C | -0.35073000 | -3.20693600 | -0.20629900 |
| H  | 4.37205800  | -3.58274200 | 3.13637900  | C | -1.27575300 | -4.34601600 | 0.23141900  |
| C  | 2.48417400  | 0.98078000  | -1.89888400 | C | -2.64088300 | -3.87150800 | 0.76766300  |
| C  | 3.24733700  | 1.84783900  | -1.09545900 | C | -3.59148000 | -5.01649600 | 1.04211900  |
| H  | 3.55944300  | 1.53516000  | -0.10458300 | C | -3.62884800 | -5.64273200 | 2.29597800  |
| C  | 3.62676100  | 3.11196600  | -1.55342900 | C | -4.48598300 | -6.71740000 | 2.53959500  |
| C  | 3.21213800  | 3.51587300  | -2.83164900 | C | -5.32511500 | -7.18723400 | 1.52742100  |
| H  | 3.50393600  | 4.49867700  | -3.19941800 | C | -5.29961000 | -6.57275700 | 0.27344900  |
| C  | 2.44331800  | 2.68364300  | -3.64735800 | C | -4.44134000 | -5.49813100 | 0.03604000  |
| C  | 2.09015700  | 1.41253000  | -3.16920600 | H | -0.64202500 | -2.32103100 | 1.66290800  |
| H  | 1.50570000  | 0.75819000  | -3.80662900 | H | -1.43838300 | -4.97397100 | -0.65385600 |
| C  | 1.99557000  | 3.12907000  | -5.02142400 | H | -0.75997900 | -4.97138800 | 0.97259200  |
| H  | 0.90506700  | 3.24276200  | -5.06697600 | H | -2.50179200 | -3.29749300 | 1.69543200  |
| H  | 2.27345800  | 2.39663300  | -5.78886800 | H | -2.97885100 | -5.28191900 | 3.09119900  |
| H  | 2.44278000  | 4.08999900  | -5.29598500 | H | -4.50059400 | -7.18531400 | 3.52091100  |
| C  | 4.47947600  | 4.02577300  | -0.70236800 | H | -5.99555400 | -8.02183700 | 1.71505500  |
| H  | 5.46210400  | 4.19563500  | -1.16183100 | H | -5.95301900 | -6.92701200 | -0.52001200 |
| H  | 4.64213200  | 3.60506600  | 0.29417800  | H | -4.43075000 | -5.02006300 | -0.94125800 |
| H  | 4.00962400  | 5.00979300  | -0.58031400 | O | -0.88574700 | -2.32220900 | -1.04715900 |
| Ru | -0.11051700 | -0.56693500 | -0.17358900 | O | 0.11201100  | -2.39976700 | 1.05037100  |
| P  | 0.19956100  | 1.11220800  | 1.48567700  | H | -3.06742900 | -3.17770200 | 0.03662900  |
| P  | 1.93049700  | -0.66773000 | -1.24186100 |   |             |             |             |
| H  | -1.37168600 | 5.12604600  | -2.42700800 |   |             |             |             |

**Int7**

|   |             |             |             |   |             |             |             |
|---|-------------|-------------|-------------|---|-------------|-------------|-------------|
| C | 1.66907400  | 2.12208200  | 2.48881100  | H | 0.41927000  | 7.02667900  | -0.28330900 |
| C | 0.46451000  | 2.28390100  | 3.18772000  | H | 2.02324600  | 7.26235700  | -0.98103800 |
| H | -0.46678900 | 1.97840200  | 2.72618700  | H | 1.85541200  | 6.68941500  | 0.68821600  |
| C | 0.43988000  | 2.86815400  | 4.46203200  | C | 1.11149700  | 3.28864000  | -4.12573200 |
| C | 1.64331900  | 3.29463300  | 5.02992700  | H | 1.66035400  | 2.38720600  | -4.41775300 |
| H | 1.63266500  | 3.75399500  | 6.01743800  | H | 1.46563100  | 4.12266700  | -4.74142300 |
| C | 2.86315400  | 3.14750200  | 4.35807000  | C | -0.65389100 | -3.06465900 | -1.35616800 |
| C | 2.86190400  | 2.56117400  | 3.08802100  | C | -1.82836200 | -2.45252200 | -1.82326000 |
| H | 3.80627300  | 2.45136000  | 2.56559300  | H | -1.95712300 | -1.38295200 | -1.70892100 |
| C | -0.86716200 | 3.01018800  | 5.20922500  | C | -2.84266900 | -3.21171400 | -2.41814300 |
| H | -1.11684500 | 2.08712600  | 5.74961800  | C | -2.67081100 | -4.59682900 | -2.53126100 |
| H | -1.69671800 | 3.21809500  | 4.52508500  | H | -3.45606800 | -5.19299100 | -2.99406700 |
| H | -0.82242900 | 3.81782200  | 5.94782800  | C | -1.51875800 | -5.23409500 | -2.06161300 |
| C | 4.15566400  | 3.59668400  | 5.00224300  | C | -0.51174800 | -4.45297300 | -1.47950100 |
| H | 4.96082200  | 3.68460800  | 4.26564100  | H | 0.38781400  | -4.94493900 | -1.12469000 |
| H | 4.48834900  | 2.88361300  | 5.76839100  | C | -4.11715900 | -2.55060900 | -2.89335100 |
| H | 4.04128400  | 4.56857300  | 5.49638300  | H | -3.94385100 | -1.50786900 | -3.17928600 |
| C | 3.43748300  | 0.86365900  | 0.65114900  | H | -4.87809300 | -2.54832600 | -2.10127100 |
| C | 4.38680900  | 1.67315100  | 0.01189400  | H | -4.54589900 | -3.07513900 | -3.75473400 |
| H | 4.07068600  | 2.58579500  | -0.48351000 | C | -1.36839500 | -6.73593900 | -2.15663600 |
| C | 5.74521600  | 1.33271400  | 0.01304400  | H | -1.91072200 | -7.13940700 | -3.01882100 |
| C | 6.14186800  | 0.16255900  | 0.67301600  | H | -1.76548000 | -7.23351200 | -1.26149200 |
| H | 7.19689700  | -0.10646700 | 0.68866100  | H | -0.31706000 | -7.02940400 | -2.25014600 |
| C | 5.21838900  | -0.66713100 | 1.32004600  | C | 1.81251400  | -3.25466100 | 0.13744400  |
| C | 3.86497500  | -0.30526000 | 1.29482000  | C | 2.81829500  | -3.93242800 | -0.56558300 |
| H | 3.13896000  | -0.94821100 | 1.78581800  | H | 3.00882600  | -3.69242300 | -1.60656100 |
| C | 6.76021600  | 2.20181300  | -0.69458900 | C | 3.58400800  | -4.93386200 | 0.04782300  |
| H | 7.71126100  | 2.23135600  | -0.15118900 | C | 3.31489000  | -5.26117100 | 1.38115400  |
| H | 6.39908200  | 3.22964800  | -0.80345200 | H | 3.89534500  | -6.04707500 | 1.86220400  |
| H | 6.97473100  | 1.82267300  | -1.70267000 | C | 2.30743000  | -4.61365200 | 2.10795900  |
| C | 5.66865900  | -1.90938000 | 2.05479600  | C | 1.56492900  | -3.61228400 | 1.47223400  |
| H | 6.68544500  | -2.19659200 | 1.76691800  | H | 0.76612000  | -3.12782100 | 2.02469800  |
| H | 5.00416200  | -2.75670300 | 1.85440700  | C | 4.68676700  | -5.63359700 | -0.71460000 |
| H | 5.66870100  | -1.74727200 | 3.14086200  | H | 4.47553200  | -5.66195800 | -1.78873900 |
| C | 1.51316900  | 2.78793700  | -0.35695900 | H | 4.82283100  | -6.66356800 | -0.36759100 |
| C | 1.53684400  | 4.11655900  | 0.09126100  | H | 5.64778500  | -5.11761100 | -0.58610500 |
| H | 1.64441800  | 4.32752800  | 1.15060000  | C | 2.03431300  | -4.98095400 | 3.54893400  |
| C | 1.43077900  | 5.18302700  | -0.81005300 | H | 2.07875500  | -6.06546100 | 3.70032500  |
| C | 1.30965200  | 4.89477300  | -2.17550100 | H | 1.04745300  | -4.63282500 | 3.86895400  |
| H | 1.24126900  | 5.71689800  | -2.88677200 | H | 2.77651200  | -4.53041000 | 4.22131500  |
| C | 1.27747500  | 3.57866000  | -2.65104100 | C | 1.59370800  | -1.45814800 | -2.18624400 |
| C | 1.37611900  | 2.52976900  | -1.72824300 | C | 2.96289900  | -1.13589400 | -2.15374600 |
| H | 1.33731100  | 1.50500100  | -2.08437900 | H | 3.51977300  | -1.22833900 | -1.22815000 |
| C | 1.43616400  | 6.61409400  | -0.32024700 | C | 3.63463600  | -0.71244100 | -3.30391900 |

|    |             |             |             |
|----|-------------|-------------|-------------|
| C  | 2.91030200  | -0.58399800 | -4.49798200 |
| H  | 3.42679100  | -0.26003900 | -5.40039600 |
| C  | 1.54640100  | -0.87439300 | -4.55860600 |
| C  | 0.90128000  | -1.31897600 | -3.39471000 |
| H  | -0.15200600 | -1.56978900 | -3.44916900 |
| C  | 0.76958800  | -0.72716000 | -5.84762100 |
| H  | 0.04198000  | 0.09183900  | -5.78252700 |
| H  | 0.20614500  | -1.63841100 | -6.08058200 |
| H  | 1.43308300  | -0.51567800 | -6.69245900 |
| C  | 5.11450500  | -0.40479700 | -3.27550100 |
| H  | 5.65518100  | -0.98370400 | -4.03478400 |
| H  | 5.55064400  | -0.63228100 | -2.29891700 |
| H  | 5.30394300  | 0.65571000  | -3.48591900 |
| Ru | -0.17374500 | -0.25121500 | 0.62426300  |
| P  | 1.65093200  | 1.34522400  | 0.79180600  |
| P  | 0.69479600  | -1.99976700 | -0.64980600 |
| H  | 0.05591300  | 3.12010700  | -4.37782300 |
| H  | -1.59102700 | -3.11630600 | 1.38832700  |
| C  | -1.72694600 | 1.56564300  | -0.29543600 |
| C  | -2.70189000 | 2.51337300  | -0.95913900 |
| C  | -2.74380600 | 3.90086700  | -0.28702600 |
| C  | -3.69584600 | 4.84871900  | -0.98417500 |
| C  | -3.25821700 | 5.64778300  | -2.05010600 |
| C  | -4.13930300 | 6.49855200  | -2.71951000 |
| C  | -5.47934800 | 6.56537200  | -2.33202600 |
| C  | -5.92849200 | 5.77686700  | -1.27067100 |
| C  | -5.04293700 | 4.92790200  | -0.60455200 |
| H  | -2.43329400 | 2.59690900  | -2.01709300 |
| H  | -3.69833100 | 2.05191600  | -0.92094300 |
| H  | -3.03071800 | 3.77154900  | 0.76155300  |
| H  | -2.21362500 | 5.60271200  | -2.35259100 |
| H  | -3.77859200 | 7.11253900  | -3.54114200 |
| H  | -6.16663300 | 7.22925000  | -2.84989200 |
| H  | -6.96843200 | 5.82555000  | -0.95757000 |
| H  | -5.39920200 | 4.32027700  | 0.22491900  |
| O  | -1.08232500 | 0.72595000  | -1.01751200 |
| O  | -1.53017400 | 1.58537900  | 0.95381200  |
| H  | -1.73113000 | 4.32117600  | -0.28635400 |
| C  | -2.21360000 | -2.23054300 | 1.61463900  |
| C  | -3.69126300 | -2.66888400 | 1.59918400  |
| C  | -4.67593200 | -1.54502600 | 1.97535200  |
| C  | -6.12241500 | -1.95636600 | 1.80974800  |
| C  | -6.80434900 | -2.63658200 | 2.82912000  |
| C  | -8.12734300 | -3.04839700 | 2.66147900  |

|   |             |             |             |
|---|-------------|-------------|-------------|
| C | -8.79808600 | -2.78544800 | 1.46495400  |
| C | -8.13403800 | -2.10627100 | 0.44153100  |
| C | -6.81088800 | -1.69633700 | 0.61580200  |
| H | -3.91642800 | -3.02643000 | 0.58726500  |
| H | -3.81560200 | -3.51991700 | 2.28101900  |
| H | -4.49993000 | -1.24678600 | 3.01794900  |
| H | -6.29043100 | -2.84269200 | 3.76595300  |
| H | -8.63640800 | -3.57151700 | 3.46746100  |
| H | -9.82938200 | -3.10269300 | 1.33343500  |
| H | -8.64818700 | -1.88970800 | -0.49185300 |
| H | -6.30214600 | -1.15944700 | -0.18253500 |
| O | -2.02170200 | -1.19717600 | 0.75349200  |
| O | -1.79714100 | -1.90595400 | 2.97661400  |
| H | -4.45667100 | -0.67433200 | 1.34865200  |
| H | -0.08272300 | -1.00483700 | 2.24755100  |
| H | 0.70970800  | -0.86481300 | 2.03607300  |
| H | -2.18256400 | -1.02789500 | 3.14457200  |

**TS5**

|   |             |             |             |
|---|-------------|-------------|-------------|
| C | 0.87056300  | 2.26779400  | 2.55760500  |
| C | -0.44684300 | 2.31459400  | 3.04118900  |
| H | -1.25442400 | 1.94823600  | 2.41836000  |
| C | -0.73727400 | 2.85669200  | 4.29863800  |
| C | 0.31286300  | 3.35948800  | 5.07560100  |
| H | 0.09519500  | 3.78758000  | 6.05327200  |
| C | 1.63454700  | 3.33045700  | 4.62177700  |
| C | 1.89935300  | 2.78572100  | 3.35801400  |
| H | 2.92395300  | 2.77599500  | 3.00258100  |
| C | -2.15875900 | 2.88008600  | 4.81491300  |
| H | -2.35677100 | 2.02381000  | 5.47412400  |
| H | -2.88142800 | 2.83458700  | 3.99382600  |
| H | -2.36096800 | 3.78669200  | 5.39666800  |
| C | 2.76189100  | 3.85462700  | 5.48304600  |
| H | 3.59135800  | 4.22955300  | 4.87382600  |
| H | 3.16707700  | 3.06652500  | 6.13225400  |
| H | 2.42459200  | 4.66848400  | 6.13438200  |
| C | 3.05049100  | 1.42130000  | 0.93246200  |
| C | 3.89754600  | 2.40069300  | 0.39443300  |
| H | 3.47592200  | 3.24103000  | -0.14792700 |
| C | 5.28539500  | 2.32460200  | 0.55916900  |
| C | 5.81658700  | 1.24644100  | 1.27970900  |
| H | 6.89416300  | 1.18365500  | 1.42394200  |
| C | 4.99766200  | 0.25372400  | 1.82915900  |
| C | 3.61175100  | 0.35254100  | 1.64238300  |
| H | 2.96219500  | -0.40986200 | 2.06361400  |



|   |             |             |             |    |             |             |             |
|---|-------------|-------------|-------------|----|-------------|-------------|-------------|
| C | 6.19463800  | 3.37893800  | -0.03109000 | C  | 4.46224100  | -4.24467300 | 0.18522500  |
| H | 7.01600400  | 3.62675800  | 0.65097500  | C  | 4.19959000  | -4.57474900 | 1.52187100  |
| H | 5.64646800  | 4.30078300  | -0.25065300 | H  | 4.86702200  | -5.26171700 | 2.04009400  |
| H | 6.64748200  | 3.03523400  | -0.97047800 | C  | 3.09708600  | -4.05022300 | 2.20363700  |
| C | 5.58587200  | -0.88792500 | 2.62700000  | C  | 2.24226700  | -3.17534500 | 1.51847700  |
| H | 6.67895900  | -0.89756800 | 2.56274800  | H  | 1.38025200  | -2.76556700 | 2.03524000  |
| H | 5.21468700  | -1.85578400 | 2.27265300  | C  | 5.67132000  | -4.81135100 | -0.52463300 |
| H | 5.31807400  | -0.80821700 | 3.68873300  | H  | 5.56787600  | -4.73761000 | -1.61193000 |
| C | 0.93051700  | 2.99671400  | -0.26310500 | H  | 5.82853200  | -5.86558900 | -0.26956500 |
| C | 0.68197300  | 4.29366200  | 0.21123200  | H  | 6.58617200  | -4.27197400 | -0.24512600 |
| H | 0.64632600  | 4.48061000  | 1.27990200  | C  | 2.83877500  | -4.39838000 | 3.65220800  |
| C | 0.48232900  | 5.35947900  | -0.67389600 | H  | 3.29607700  | -5.35633800 | 3.92162900  |
| C | 0.54853100  | 5.10660800  | -2.05054000 | H  | 1.76594700  | -4.46142100 | 3.86337100  |
| H | 0.40847500  | 5.93105200  | -2.74850300 | H  | 3.25571600  | -3.63621900 | 4.32407200  |
| C | 0.79237600  | 3.82364900  | -2.55244700 | C  | 2.15316000  | -1.03493200 | -2.11070200 |
| C | 0.97635200  | 2.77192700  | -1.64528400 | C  | 3.45051900  | -0.52285800 | -1.92879400 |
| H | 1.14697700  | 1.76838200  | -2.02251600 | H  | 3.93001100  | -0.59204700 | -0.95853300 |
| C | 0.18965900  | 6.75107800  | -0.15851400 | C  | 4.15450400  | 0.06060600  | -2.98625400 |
| H | -0.88092700 | 6.98522200  | -0.22816200 | C  | 3.53333100  | 0.15268300  | -4.23985700 |
| H | 0.72441400  | 7.51411200  | -0.73607600 | H  | 4.07711800  | 0.59864200  | -5.07149500 |
| H | 0.47900300  | 6.85712300  | 0.89201600  | C  | 2.23851400  | -0.32598100 | -4.44827200 |
| C | 0.83292400  | 3.56344500  | -4.04133200 | C  | 1.56147300  | -0.92277900 | -3.37449900 |
| H | 1.64623600  | 2.87738700  | -4.30213300 | H  | 0.56450800  | -1.31305500 | -3.54448900 |
| H | 0.97016700  | 4.49081100  | -4.60768400 | C  | 1.56884900  | -0.21229300 | -5.79948900 |
| C | 0.18856700  | -3.08428100 | -1.56212200 | H  | 0.78350500  | 0.55457900  | -5.79072800 |
| C | -1.00553600 | -2.68931600 | -2.19274600 | H  | 1.09268600  | -1.15581100 | -6.09019300 |
| H | -1.33863000 | -1.66015700 | -2.11504900 | H  | 2.28669800  | 0.05869200  | -6.58070700 |
| C | -1.78047900 | -3.60766200 | -2.90522700 | C  | 5.56394300  | 0.57336600  | -2.79602400 |
| C | -1.35986700 | -4.94411800 | -2.96382800 | H  | 6.26012800  | 0.09316500  | -3.49539000 |
| H | -1.96004600 | -5.66755400 | -3.51433900 | H  | 5.92178200  | 0.38783200  | -1.77937000 |
| C | -0.19361700 | -5.37103700 | -2.32727300 | H  | 5.62176200  | 1.65420900  | -2.97795100 |
| C | 0.57776100  | -4.42625900 | -1.63260100 | Ru | -0.19685700 | -0.31027400 | 0.42458100  |
| H | 1.49007700  | -4.75823600 | -1.14860000 | P  | 1.20133000  | 1.55157500  | 0.86327500  |
| C | -3.06037300 | -3.17530500 | -3.58528700 | P  | 1.20552900  | -1.78552700 | -0.69276200 |
| H | -3.19560400 | -2.09129000 | -3.52279600 | H  | -0.10134700 | 3.10036300  | -4.38576000 |
| H | -3.93701000 | -3.64677800 | -3.12206700 | H  | -1.01790200 | -3.31817600 | 1.37788200  |
| H | -3.06809800 | -3.45760800 | -4.64565200 | C  | -2.04856000 | 1.15954800  | -0.60596500 |
| C | 0.22876200  | -6.82305100 | -2.36363900 | C  | -3.16599700 | 1.94639000  | -1.26083600 |
| H | -0.24615000 | -7.35730900 | -3.19339700 | C  | -3.46219100 | 3.27838200  | -0.53978400 |
| H | -0.04961000 | -7.34375000 | -1.43743900 | C  | -4.53805300 | 4.08471800  | -1.23478100 |
| H | 1.31453500  | -6.92353500 | -2.47458300 | C  | -4.20509300 | 5.01913700  | -2.22564500 |
| C | 2.47201400  | -2.82679300 | 0.18215900  | C  | -5.19486200 | 5.74266200  | -2.89299100 |
| C | 3.58595400  | -3.37540700 | -0.47428700 | C  | -6.54088000 | 5.54300500  | -2.57921300 |
| H | 3.77197300  | -3.13492200 | -1.51626900 | C  | -6.88712700 | 4.61662900  | -1.59325600 |

C -5.89315600 3.89627700 -0.92874500  
H -2.89491900 2.11977400 -2.30683800  
H -4.06892000 1.32022400 -1.26381900  
H -3.75616600 3.05762200 0.49162100  
H -3.15715700 5.18135100 -2.47053700  
H -4.91475600 6.46544600 -3.65540300  
H -7.31307500 6.10732600 -3.09551900  
H -7.93178500 4.45775700 -1.33752000  
H -6.17026600 3.18019800 -0.15755000  
O -1.19673500 0.54876100 -1.32776300  
O -1.94857900 1.11022800 0.66176000  
H -2.53584000 3.86258300 -0.48498700  
C -1.85231200 -2.59413700 1.34457400  
C -3.19163000 -3.29759400 1.57084200  
C -4.39569000 -2.34288100 1.68137200  
C -5.71991900 -3.07572600 1.70718800  
C -6.28292300 -3.51105800 2.91494300  
C -7.49013400 -4.21173400 2.93517100  
C -8.15874400 -4.49028000 1.74141200  
C -7.61040700 -4.06197600 0.53060400  
C -6.40314700 -3.36157100 0.51658600  
H -3.33560700 -3.95743900 0.70535300  
H -3.12294100 -3.94051400 2.45626100  
H -4.30313400 -1.73887800 2.59472900  
H -5.77082500 -3.29342300 3.85026000  
H -7.91052200 -4.53620400 3.88385900  
H -9.10059900 -5.03249600 1.75479500  
H -8.12579600 -4.26840100 -0.40417300  
H -5.98432000 -3.02563000 -0.42993000  
O -1.83010400 -1.70854800 0.38741400  
O -1.48788300 -1.84075200 2.75184900  
H -4.35872800 -1.64937800 0.83546600  
H -0.48863400 -1.21669400 2.27277000  
H 0.40285800 -0.82703400 1.93453200  
H -2.13805400 -1.11132700 2.79285400

**TS5a**

C 1.25536300 -0.09943300 2.87555700  
C 2.25505300 0.82829800 2.55526600  
H 2.48053200 1.03499400 1.51601100  
C 2.98955000 1.47743000 3.55925600  
C 2.70899900 1.17919100 4.89488100  
H 3.27576300 1.67626100 5.68093100  
C 1.71899500 0.25274400 5.24782200

C 1.00099700 -0.38099800 4.22924300  
H 0.23719000 -1.10097200 4.50229800  
C 4.05067900 2.48939200 3.18991700  
H 3.60207800 3.42918800 2.84288700  
H 4.68717800 2.12069100 2.37749400  
H 4.69373400 2.72524000 4.04447000  
C 1.42486800 -0.04245900 6.70174200  
H 0.79188600 -0.92919400 6.80964500  
H 0.90228500 0.79556500 7.18175100  
H 2.34611400 -0.21397700 7.27123000  
C -1.13731100 -1.59524600 2.47137700  
C -1.19288100 -2.90808000 2.95935500  
H -0.40099700 -3.60976600 2.71665900  
C -2.25162800 -3.32982600 3.77310700  
C -3.25702900 -2.40884000 4.09482500  
H -4.07837800 -2.72344200 4.73672500  
C -3.22780800 -1.09056600 3.62428300  
C -2.16052600 -0.69837500 2.80534900  
H -2.12441400 0.32094800 2.43003500  
C -2.31263500 -4.75091000 4.28667900  
H -1.31546800 -5.20056300 4.33552100  
H -2.92471400 -5.38584700 3.63252200  
H -2.75527000 -4.79602800 5.28789800  
C -4.30202800 -0.10100300 4.01407100  
H -5.16406200 -0.60490400 4.46374300  
H -4.65315300 0.47070600 3.14854500  
H -3.92400100 0.62216600 4.74869300  
C 1.30986700 -2.46791400 1.16480500  
C 2.44676400 -2.80755100 1.91112800  
H 2.76057100 -2.17348800 2.73437100  
C 3.18569300 -3.96046400 1.61447500  
C 2.75658600 -4.77551200 0.56004200  
H 3.31453400 -5.68248000 0.33082400  
C 1.62685200 -4.45920700 -0.20510900  
C 0.91241500 -3.29617600 0.10525700  
H 0.04316900 -3.03150600 -0.48854300  
C 4.42771900 -4.30672800 2.40508600  
H 5.33044300 -3.91161300 1.92042700  
H 4.55659600 -5.39110900 2.49478700  
H 4.39066500 -3.88437600 3.41462400  
C 1.20087300 -5.33699100 -1.36020300  
H 0.11317800 -5.32848000 -1.48561300  
H 1.52307100 -6.37415000 -1.21654700  
C -2.36686500 0.70886400 -2.77042200

|   |             |             |             |    |             |             |             |
|---|-------------|-------------|-------------|----|-------------|-------------|-------------|
| C | -1.24519300 | 0.79811600  | -3.60461600 | H  | -0.98203100 | -4.42392900 | -4.16862200 |
| H | -0.27668100 | 0.47735500  | -3.23676300 | H  | -2.45329100 | -3.76888200 | -4.88697500 |
| C | -1.34878900 | 1.31827100  | -4.90238600 | C  | -3.94639500 | -4.75684500 | 0.63678400  |
| C | -2.60525300 | 1.72789400  | -5.36057600 | H  | -4.89333300 | -5.20029700 | 0.30332700  |
| H | -2.69512000 | 2.14050100  | -6.36423100 | H  | -4.14772000 | -4.16456800 | 1.53387500  |
| C | -3.74842200 | 1.62878700  | -4.55775800 | H  | -3.28808100 | -5.58679400 | 0.92344700  |
| C | -3.61367500 | 1.12365100  | -3.25969300 | Ru | -0.00297100 | 0.50883900  | -0.30021100 |
| H | -4.49366000 | 1.06861300  | -2.62687200 | P  | 0.30933000  | -0.95042700 | 1.51174500  |
| C | -0.10772500 | 1.48756700  | -5.74978300 | P  | -2.16538000 | 0.04619400  | -1.04123400 |
| H | 0.52222300  | 2.28787800  | -5.34036700 | H  | 1.63891300  | -4.98644400 | -2.30443400 |
| H | -0.35782500 | 1.74785000  | -6.78344600 | H  | 1.60122500  | 2.31952500  | -2.33996200 |
| H | 0.49625000  | 0.57264100  | -5.76585500 | C  | 2.16847100  | -0.32114100 | -1.42098400 |
| C | -5.10157400 | 2.04795200  | -5.08731200 | C  | 3.39409000  | -0.83125400 | -2.14750700 |
| H | -5.79487300 | 2.28240700  | -4.27286100 | C  | 4.63829900  | -0.92235200 | -1.24004100 |
| H | -5.55986300 | 1.25060600  | -5.68815100 | C  | 5.83864000  | -1.48978100 | -1.96664000 |
| H | -5.02402700 | 2.93180300  | -5.73044900 | C  | 6.05743100  | -2.87407000 | -2.01352000 |
| C | -3.65871100 | 0.75982300  | -0.20544300 | C  | 7.14413500  | -3.40613300 | -2.70932600 |
| C | -4.90393000 | 0.11751300  | -0.14637500 | C  | 8.03426000  | -2.55873900 | -3.37271400 |
| H | -5.01982000 | -0.88232700 | -0.55165700 | C  | 7.82917200  | -1.17812600 | -3.33299300 |
| C | -6.01966100 | 0.75319900  | 0.41450300  | C  | 6.74102600  | -0.65108000 | -2.63516900 |
| C | -5.87341100 | 2.05664400  | 0.90432000  | H  | 3.15176000  | -1.80622800 | -2.58163700 |
| H | -6.73820800 | 2.56394800  | 1.32925800  | H  | 3.59836800  | -0.15275700 | -2.98774100 |
| C | -4.64689600 | 2.72947400  | 0.84844900  | H  | 4.86162100  | 0.07677900  | -0.85216000 |
| C | -3.54726100 | 2.06650600  | 0.29077400  | H  | 5.36807900  | -3.53796100 | -1.49496100 |
| H | -2.59851900 | 2.58854000  | 0.21587400  | H  | 7.29846100  | -4.48216000 | -2.73014100 |
| C | -7.35128200 | 0.04141100  | 0.49919400  | H  | 8.88291100  | -2.97053700 | -3.91257700 |
| H | -7.42554200 | -0.75922600 | -0.24400000 | H  | 8.51945600  | -0.50979000 | -3.84156000 |
| H | -8.18631400 | 0.73226200  | 0.33835000  | H  | 6.59105100  | 0.42621400  | -2.60325400 |
| H | -7.49557400 | -0.41593200 | 1.48725400  | O  | 1.01359100  | -0.76968200 | -1.72896000 |
| C | -4.50482900 | 4.13369000  | 1.39039000  | O  | 2.26478100  | 0.55588000  | -0.50622200 |
| H | -3.74217700 | 4.69738500  | 0.84322500  | H  | 4.39505700  | -1.54950600 | -0.37415200 |
| H | -4.20544200 | 4.12298700  | 2.44699600  | C  | 0.90732200  | 3.08674900  | -1.95569900 |
| H | -5.44856700 | 4.68565400  | 1.32528700  | C  | 1.68672400  | 4.00872400  | -1.01004400 |
| C | -2.53513700 | -1.75638700 | -1.28369400 | C  | 0.83306800  | 5.14254400  | -0.41139800 |
| C | -3.07462900 | -2.55144700 | -0.25621500 | C  | 1.61095500  | 6.01171700  | 0.55156900  |
| H | -3.31751100 | -2.10884300 | 0.70338100  | C  | 2.33659800  | 7.12240000  | 0.09730900  |
| C | -3.32323000 | -3.91318500 | -0.45218200 | C  | 3.08159600  | 7.90732200  | 0.97921100  |
| C | -2.99515700 | -4.48723300 | -1.68890100 | C  | 3.11443600  | 7.59638200  | 2.34016700  |
| H | -3.18987000 | -5.54639400 | -1.85114900 | C  | 2.39487400  | 6.49515800  | 2.80936400  |
| C | -2.43560800 | -3.73036900 | -2.72037800 | C  | 1.65205400  | 5.71331700  | 1.92195700  |
| C | -2.21815400 | -2.36148700 | -2.50623500 | H  | -0.41164700 | 3.46939200  | -3.28791500 |
| H | -1.80485600 | -1.76711200 | -3.31410400 | H  | 2.11571200  | 3.39041300  | -0.21213800 |
| C | -2.07083900 | -4.35925900 | -4.04625900 | H  | 2.52948200  | 4.44010000  | -1.56622500 |
| H | -2.47523900 | -5.37300700 | -4.13349500 | H  | 0.43653300  | 5.74490000  | -1.23565000 |

|   |             |            |             |
|---|-------------|------------|-------------|
| H | 2.31247700  | 7.37447900 | -0.96090100 |
| H | 3.63316300  | 8.76582700 | 0.60353100  |
| H | 3.69066000  | 8.20884200 | 3.02890700  |
| H | 2.40483000  | 6.24830700 | 3.86837100  |
| H | 1.08822200  | 4.86089200 | 2.29677300  |
| O | -0.20350700 | 2.47833300 | -1.37200100 |
| O | 0.44450600  | 3.86915100 | -3.06203500 |
| H | -0.03071400 | 4.70483400 | 0.10347300  |
| H | -0.33980400 | 2.24322800 | 0.04758200  |
| H | -0.53190700 | 1.74640700 | 0.83180200  |

**Int8**

|   |             |             |             |
|---|-------------|-------------|-------------|
| C | 0.49363700  | -2.40006300 | 1.89085400  |
| C | 1.53383400  | -1.59910400 | 2.37110100  |
| H | 1.77292600  | -0.66669800 | 1.87328700  |
| C | 2.24843600  | -1.95794500 | 3.52596300  |
| C | 1.90344600  | -3.13604300 | 4.19047400  |
| H | 2.44476200  | -3.41737000 | 5.09325800  |
| C | 0.86425300  | -3.96120200 | 3.73340500  |
| C | 0.16553700  | -3.57871700 | 2.58637900  |
| H | -0.65300500 | -4.20183900 | 2.23643500  |
| C | 3.37217200  | -1.07666200 | 4.02415000  |
| H | 3.20612500  | -0.03300900 | 3.73853400  |
| H | 4.33787500  | -1.38173000 | 3.59809500  |
| H | 3.47012700  | -1.12571400 | 5.11441800  |
| C | 0.50751600  | -5.22859800 | 4.47815100  |
| H | -0.35899300 | -5.72515100 | 4.02980900  |
| H | 0.26722000  | -5.02145900 | 5.52849500  |
| H | 1.34004400  | -5.94413500 | 4.47608200  |
| C | -2.15217100 | -2.38173500 | 0.92200200  |
| C | -2.94035800 | -3.33978600 | 0.27769800  |
| H | -2.58206100 | -3.82231000 | -0.62615100 |
| C | -4.19449500 | -3.70500800 | 0.78801100  |
| C | -4.63891500 | -3.10670500 | 1.97067800  |
| H | -5.60169500 | -3.40120400 | 2.38601900  |
| C | -3.87468000 | -2.13852700 | 2.63551100  |
| C | -2.63732600 | -1.78126400 | 2.09402200  |
| H | -2.03645700 | -1.03486700 | 2.60669600  |
| C | -5.05412000 | -4.70907600 | 0.05489000  |
| H | -5.78724300 | -5.17549200 | 0.72186300  |
| H | -4.44940200 | -5.50492200 | -0.39438400 |
| H | -5.61006000 | -4.22465200 | -0.75909700 |
| C | -4.35569500 | -1.51318900 | 3.92571000  |
| H | -5.44185500 | -1.60260100 | 4.03501200  |

|   |             |             |             |
|---|-------------|-------------|-------------|
| H | -4.09542200 | -0.44987500 | 3.97320700  |
| H | -3.89831200 | -1.99871700 | 4.79831600  |
| C | 0.01178800  | -3.22397600 | -0.85694900 |
| C | 0.95350300  | -4.22014100 | -0.57587300 |
| H | 1.40649100  | -4.27457900 | 0.40867100  |
| C | 1.33312100  | -5.16230900 | -1.54686600 |
| C | 0.74933200  | -5.09241700 | -2.81247700 |
| H | 1.03923000  | -5.81522800 | -3.57380800 |
| C | -0.19963100 | -4.10779300 | -3.12829400 |
| C | -0.54783600 | -3.17598000 | -2.14722800 |
| H | -1.25496600 | -2.38905600 | -2.38984100 |
| C | 2.33771900  | -6.24177800 | -1.20933200 |
| H | 2.73200200  | -6.71974800 | -2.11213200 |
| H | 1.88391100  | -7.02853700 | -0.59223000 |
| H | 3.18489500  | -5.84040400 | -0.64083900 |
| C | -0.82313000 | -4.06241100 | -4.50536100 |
| H | -1.42114300 | -3.15668700 | -4.64396900 |
| H | -1.48176900 | -4.92462500 | -4.67368100 |
| C | -2.03205000 | 2.64280400  | -1.73640000 |
| C | -0.91404400 | 3.38848500  | -2.12186400 |
| H | 0.05881100  | 3.14244000  | -1.71144300 |
| C | -1.02780700 | 4.43801900  | -3.04861000 |
| C | -2.28133600 | 4.73160000  | -3.58573600 |
| H | -2.37580600 | 5.54134900  | -4.30828200 |
| C | -3.42147400 | 4.00082100  | -3.22265500 |
| C | -3.28232900 | 2.96002100  | -2.30193800 |
| H | -4.16232600 | 2.38295900  | -2.03674500 |
| C | 0.19789800  | 5.22752900  | -3.45126600 |
| H | 0.61461300  | 5.78071300  | -2.60008500 |
| H | -0.03291900 | 5.95250500  | -4.23900100 |
| H | 0.99205300  | 4.56774700  | -3.82095100 |
| C | -4.76909300 | 4.33196100  | -3.82457300 |
| H | -5.07835000 | 5.35617000  | -3.57886100 |
| H | -5.54667000 | 3.65280300  | -3.46029400 |
| H | -4.74859200 | 4.25859400  | -4.91936500 |
| C | -2.39634500 | 2.14254500  | 1.09646800  |
| C | -3.44666500 | 3.07646300  | 1.13556500  |
| H | -3.98169500 | 3.32696900  | 0.22468500  |
| C | -3.80917800 | 3.70725100  | 2.32766600  |
| C | -3.09447700 | 3.39663000  | 3.49519300  |
| H | -3.36238900 | 3.89187300  | 4.42778000  |
| C | -2.03667800 | 2.48586300  | 3.48668700  |
| C | -1.69559600 | 1.86504400  | 2.27403300  |
| H | -0.84331900 | 1.19453300  | 2.23659800  |

|    |             |             |             |              |             |             |             |
|----|-------------|-------------|-------------|--------------|-------------|-------------|-------------|
| C  | -4.93870800 | 4.71237100  | 2.36599000  | H            | 6.59082600  | 8.02578000  | 1.47579500  |
| H  | -5.74710900 | 4.38368800  | 3.03186000  | H            | 7.00255900  | 6.41275700  | -0.37433800 |
| H  | -5.36861500 | 4.86721600  | 1.37130400  | H            | 5.23559100  | 4.81323000  | -1.04413500 |
| H  | -4.59549900 | 5.68661600  | 2.73616900  | O            | 1.31813200  | 1.37365000  | 1.36369800  |
| C  | -1.26292600 | 2.16684500  | 4.74633600  | O            | 1.43171600  | 2.04684400  | -0.73985800 |
| H  | -1.56237100 | 1.19703900  | 5.16602800  | H            | 1.74930800  | 4.93534500  | 0.15517100  |
| H  | -1.42654400 | 2.92399400  | 5.52062300  | C            | 2.62659000  | -1.18260900 | -1.70536000 |
| H  | -0.18804800 | 2.10943500  | 4.54263500  | C            | 4.03226300  | -1.67703500 | -1.88014500 |
| C  | -3.34052300 | 0.26340600  | -0.95036000 | C            | 4.93762200  | -1.50076600 | -0.65042700 |
| C  | -4.50860500 | 0.18215000  | -0.18944500 | C            | 6.33304100  | -2.03885500 | -0.88796500 |
| H  | -4.56307900 | 0.67731200  | 0.77448000  | C            | 7.33519100  | -1.22096800 | -1.42794100 |
| C  | -5.63471900 | -0.51355600 | -0.65961700 | C            | 8.61261700  | -1.72326700 | -1.68087300 |
| C  | -5.56921800 | -1.12575800 | -1.91241400 | C            | 8.91010500  | -3.05739500 | -1.39545900 |
| H  | -6.44491500 | -1.64812500 | -2.29545600 | C            | 7.92219600  | -3.88248500 | -0.85412300 |
| C  | -4.40732800 | -1.07043700 | -2.69667200 | C            | 6.64629000  | -3.37511400 | -0.60318300 |
| C  | -3.30269200 | -0.37399900 | -2.20246500 | H            | 3.96275700  | -2.73575200 | -2.17505300 |
| H  | -2.40475900 | -0.29585500 | -2.80977500 | H            | 4.45318500  | -1.16872500 | -2.76173200 |
| C  | -4.35783000 | -1.75157100 | -4.04603600 | H            | 4.97956600  | -0.43666900 | -0.39242600 |
| H  | -5.31491200 | -1.66737200 | -4.57357900 | H            | 7.11360700  | -0.17800900 | -1.64557600 |
| H  | -4.13835100 | -2.82327300 | -3.94617700 | H            | 9.37685500  | -1.07091300 | -2.09540000 |
| H  | -3.58242800 | -1.31566100 | -4.68501900 | H            | 9.90520200  | -3.44929900 | -1.58797500 |
| C  | -6.88841700 | -0.59015900 | 0.18111100  | H            | 8.14607000  | -4.92036800 | -0.62121300 |
| H  | -7.12802000 | 0.37906800  | 0.63379100  | H            | 5.88390400  | -4.02209400 | -0.17333600 |
| H  | -6.76527400 | -1.30853100 | 1.00157300  | O            | 2.22034000  | -0.67546900 | -0.66655400 |
| H  | -7.75165500 | -0.90820900 | -0.41322100 | H            | 4.47291900  | -2.00573000 | 0.20380200  |
| Ru | 0.18972300  | 0.20725000  | -0.40822300 | H            | 1.93927200  | -1.29746000 | -2.55796000 |
| P  | -0.44835700 | -1.88809300 | 0.36370700  |              |             |             |             |
| P  | -1.85961900 | 1.28072900  | -0.46299100 | <b>Int8a</b> |             |             |             |
| H  | -0.05976400 | -4.08577600 | -5.29260300 | C            | 0.60851700  | -2.03930800 | 2.39340900  |
| H  | -0.21677700 | -0.27770100 | -1.87635700 | C            | 1.64609100  | -1.20838700 | 2.82506000  |
| C  | 1.78531600  | 2.14833800  | 0.48364900  | H            | 1.89795300  | -0.33117400 | 2.24295200  |
| C  | 2.81693800  | 3.19957100  | 0.87419500  | C            | 2.37568400  | -1.50514200 | 3.98680700  |
| C  | 2.74449700  | 4.48911500  | 0.03364500  | C            | 2.05030000  | -2.65322000 | 4.71062300  |
| C  | 3.80881000  | 5.49441900  | 0.41885700  | H            | 2.61294300  | -2.89170800 | 5.61239800  |
| C  | 3.59166500  | 6.41174000  | 1.45690000  | C            | 1.01320900  | -3.50630500 | 4.30588100  |
| C  | 4.58395300  | 7.31633600  | 1.83765300  | C            | 0.29983900  | -3.18520200 | 3.14889700  |
| C  | 5.81772400  | 7.32005900  | 1.18327200  | H            | -0.51083600 | -3.83715000 | 2.83707100  |
| C  | 6.04798400  | 6.41393900  | 0.14619500  | C            | 3.48116400  | -0.58034000 | 4.44539100  |
| C  | 5.05134100  | 5.51187900  | -0.23030000 | H            | 3.07377800  | 0.33847600  | 4.88853800  |
| H  | 2.69583100  | 3.41701700  | 1.94029700  | H            | 4.12032100  | -0.27899000 | 3.60717300  |
| H  | 3.81246200  | 2.74644900  | 0.76122500  | H            | 4.11540500  | -1.05550700 | 5.20132500  |
| H  | 2.83910200  | 4.21948900  | -1.02309100 | C            | 0.67779500  | -4.74239700 | 5.11052400  |
| H  | 2.63115400  | 6.41818500  | 1.96835300  | H            | -0.16087300 | -5.28998900 | 4.66888200  |
| H  | 4.39199100  | 8.02129700  | 2.64275900  | H            | 0.40316300  | -4.48735900 | 6.14194900  |

|   |             |             |             |    |             |             |             |
|---|-------------|-------------|-------------|----|-------------|-------------|-------------|
| H | 1.53234100  | -5.42883500 | 5.16739300  | H  | 1.38831200  | 4.07081800  | -4.24841200 |
| C | -2.02245100 | -2.22789500 | 1.39473100  | H  | 0.19314800  | 3.89577900  | -5.53629800 |
| C | -2.54773800 | -3.47137500 | 1.01728300  | H  | 0.82337000  | 2.45895100  | -4.70681100 |
| H | -2.01271100 | -4.09013800 | 0.30365800  | C  | -3.16196000 | 6.17444800  | -2.32273400 |
| C | -3.75033900 | -3.94132200 | 1.55928500  | H  | -3.36224000 | 6.42756600  | -1.27570900 |
| C | -4.42527600 | -3.13890100 | 2.48872200  | H  | -4.13494300 | 6.06808700  | -2.82097700 |
| H | -5.35508900 | -3.49982300 | 2.92622800  | H  | -2.64920500 | 7.02428300  | -2.78518200 |
| C | -3.92990400 | -1.88910600 | 2.87856100  | C  | -3.38036200 | 1.85390100  | 0.65547000  |
| C | -2.72379300 | -1.44517000 | 2.32022700  | C  | -4.73039400 | 2.03506500  | 0.30591400  |
| H | -2.32061100 | -0.48044900 | 2.61538600  | H  | -5.08157500 | 1.72137600  | -0.67252000 |
| C | -4.31269200 | -5.28332300 | 1.14705300  | C  | -5.63982900 | 2.61044800  | 1.19785600  |
| H | -3.54192200 | -5.91715900 | 0.69685100  | C  | -5.17588700 | 3.02150200  | 2.45674600  |
| H | -5.11665100 | -5.17039900 | 0.40781200  | H  | -5.87590500 | 3.47290900  | 3.15848200  |
| H | -4.73563800 | -5.82075400 | 2.00369400  | C  | -3.83883200 | 2.86738300  | 2.83114300  |
| C | -4.65879400 | -1.04475300 | 3.89965500  | C  | -2.95251300 | 2.27455800  | 1.91826000  |
| H | -5.65354300 | -1.44866100 | 4.11511000  | H  | -1.91187400 | 2.12499700  | 2.19318800  |
| H | -4.77782900 | -0.01236300 | 3.55201900  | C  | -7.09578200 | 2.77883000  | 0.82490600  |
| H | -4.10599700 | -1.00452400 | 4.84731300  | H  | -7.26654500 | 2.54777200  | -0.23121800 |
| C | 0.19467000  | -2.92567300 | -0.36026300 | H  | -7.44075400 | 3.80401300  | 1.00616100  |
| C | 1.14921500  | -3.90668500 | -0.05728000 | H  | -7.73872500 | 2.11469100  | 1.41713200  |
| H | 1.58557600  | -3.95003400 | 0.93538700  | C  | -3.34404500 | 3.34341300  | 4.17870000  |
| C | 1.55383700  | -4.84407600 | -1.01751100 | H  | -2.80942400 | 4.29850300  | 4.09030000  |
| C | 0.97239800  | -4.79248200 | -2.28937500 | H  | -2.64694700 | 2.62547600  | 4.62519300  |
| H | 1.26663400  | -5.52643700 | -3.03838500 | H  | -4.17132500 | 3.49461900  | 4.87993800  |
| C | 0.02211200  | -3.82012900 | -2.62383300 | C  | -3.14360000 | 0.03072900  | -1.59247900 |
| C | -0.35119500 | -2.88566200 | -1.65161300 | C  | -4.11194900 | -0.80942800 | -1.01511900 |
| H | -1.07143900 | -2.11397600 | -1.90827400 | H  | -4.28472800 | -0.78129700 | 0.05549700  |
| C | 2.61048300  | -5.87583600 | -0.68950100 | C  | -4.88348900 | -1.67452600 | -1.79772500 |
| H | 3.61628200  | -5.50632400 | -0.93118400 | C  | -4.65501700 | -1.71808700 | -3.17955600 |
| H | 2.45889900  | -6.80006400 | -1.25812100 | H  | -5.25122500 | -2.38839900 | -3.79685500 |
| H | 2.60689900  | -6.12853500 | 0.37619400  | C  | -3.68737000 | -0.91260000 | -3.78305600 |
| C | -0.57051500 | -3.75827000 | -4.01343100 | C  | -2.94215900 | -0.03962800 | -2.97691900 |
| H | -1.62670300 | -3.46977900 | -3.98194700 | H  | -2.20943100 | 0.60085000  | -3.45458400 |
| H | -0.49370800 | -4.72310800 | -4.52658500 | C  | -3.44426200 | -0.96296600 | -5.27516100 |
| C | -1.87551900 | 2.62859100  | -1.68935100 | H  | -4.19743400 | -1.57462400 | -5.78248400 |
| C | -0.87333400 | 2.53233600  | -2.67305100 | H  | -2.45959500 | -1.38923500 | -5.50583400 |
| H | -0.26822000 | 1.63223000  | -2.73793000 | H  | -3.47092700 | 0.03969000  | -5.71843400 |
| C | -0.60070100 | 3.59745600  | -3.53898200 | C  | -5.97272500 | -2.51947100 | -1.17699900 |
| C | -1.34618800 | 4.78032800  | -3.40609400 | H  | -6.96549400 | -2.09029400 | -1.36958300 |
| H | -1.13910500 | 5.61774700  | -4.07073900 | H  | -5.84787700 | -2.59605200 | -0.09327700 |
| C | -2.34717600 | 4.90588600  | -2.43881100 | H  | -5.97768300 | -3.53393600 | -1.59317600 |
| C | -2.59970300 | 3.82026200  | -1.58487800 | Ru | -0.00499600 | 0.51457800  | 0.13826900  |
| H | -3.36880100 | 3.92437400  | -0.82681500 | P  | -0.35331900 | -1.62691800 | 0.84636500  |
| C | 0.50711700  | 3.49675500  | -4.56482700 | P  | -2.11589300 | 1.17626200  | -0.53161900 |

|   |             |             |             |
|---|-------------|-------------|-------------|
| H | -0.04905100 | -3.01470800 | -4.63107200 |
| H | 1.82984400  | 2.66903500  | -1.66358000 |
| C | 2.19153000  | -0.13782500 | -1.19669400 |
| C | 3.48197500  | -0.54965000 | -1.88922400 |
| C | 4.27892300  | -1.60800800 | -1.09818200 |
| C | 5.52156200  | -2.06517800 | -1.83130400 |
| C | 5.45389200  | -3.09896900 | -2.77707700 |
| C | 6.58872000  | -3.50571700 | -3.48040800 |
| C | 7.81722100  | -2.88254800 | -3.24960500 |
| C | 7.89980200  | -1.85264100 | -2.31039200 |
| C | 6.76142500  | -1.45028400 | -1.60925400 |
| H | 3.23007000  | -0.91627400 | -2.88900300 |
| H | 4.10319500  | 0.34719200  | -2.02562100 |
| H | 4.54117500  | -1.18952500 | -0.12127500 |
| H | 4.49897500  | -3.58801600 | -2.96041700 |
| H | 6.51477600  | -4.31178500 | -4.20636000 |
| H | 8.70291300  | -3.19951200 | -3.79408500 |
| H | 8.85227800  | -1.36435900 | -2.11950300 |
| H | 6.83475700  | -0.65075500 | -0.87471300 |
| O | 1.14234200  | 0.05864900  | -1.87381300 |
| O | 2.18714400  | 0.01249300  | 0.07305600  |
| H | 3.62301100  | -2.46509800 | -0.90568500 |
| C | 1.78301200  | 3.30837600  | -0.77713300 |
| C | 3.12124400  | 3.31384600  | -0.04252800 |
| C | 3.13855700  | 4.17681900  | 1.23734800  |
| C | 4.51656700  | 4.24173900  | 1.86229700  |
| C | 5.40537600  | 5.27221100  | 1.52655700  |
| C | 6.68955900  | 5.31828600  | 2.07191100  |
| C | 7.10682900  | 4.33073500  | 2.96641300  |
| C | 6.23042700  | 3.29940600  | 3.31080600  |
| C | 4.94752200  | 3.25755800  | 2.76254300  |
| H | 0.62155700  | 4.59424800  | -1.62293900 |
| H | 3.37781300  | 2.27673200  | 0.19463800  |
| H | 3.87685100  | 3.69621500  | -0.73914100 |
| H | 2.78846100  | 5.18445000  | 0.99065700  |
| H | 5.08469500  | 6.04695800  | 0.83318600  |
| H | 7.36220600  | 6.12836900  | 1.80148600  |
| H | 8.10513300  | 4.36649500  | 3.39452800  |
| H | 6.54398100  | 2.52825200  | 4.00991000  |
| H | 4.26885400  | 2.45298600  | 3.03860700  |
| O | 0.72547800  | 2.70976900  | -0.00460400 |
| O | 1.44759900  | 4.62649700  | -1.10836200 |
| H | 2.43644600  | 3.76246800  | 1.97563000  |
| H | 0.74963000  | 3.04090000  | 0.90640500  |

|            |             |             |             |
|------------|-------------|-------------|-------------|
| H          | -0.34805200 | 0.90446100  | 1.65943000  |
| <b>TS6</b> |             |             |             |
| C          | -2.08196900 | -2.11854900 | -2.20731100 |
| C          | -1.11489000 | -2.26129900 | -3.20930700 |
| H          | -0.35890100 | -1.49243700 | -3.33096400 |
| C          | -1.11893500 | -3.37640500 | -4.05914600 |
| C          | -2.11110500 | -4.34601700 | -3.89326100 |
| H          | -2.12319000 | -5.21328200 | -4.55222500 |
| C          | -3.09309100 | -4.22949800 | -2.90078700 |
| C          | -3.06969300 | -3.10820400 | -2.06536700 |
| H          | -3.83568700 | -3.00821800 | -1.30347300 |
| C          | -0.04912600 | -3.52835500 | -5.11687300 |
| H          | -0.35256200 | -4.23354300 | -5.89818900 |
| H          | 0.88618900  | -3.90221500 | -4.67984800 |
| H          | 0.18132800  | -2.56853000 | -5.59194800 |
| C          | -4.14560300 | -5.30210300 | -2.72889100 |
| H          | -4.98322800 | -4.94669600 | -2.11979500 |
| H          | -3.73298200 | -6.19070400 | -2.23259300 |
| H          | -4.54582500 | -5.63147800 | -3.69506900 |
| C          | -3.16939300 | -1.09154200 | 0.24101400  |
| C          | -4.40864300 | -0.49212100 | 0.49014200  |
| H          | -4.74800000 | 0.32875400  | -0.13346200 |
| C          | -5.23296900 | -0.94382200 | 1.52905600  |
| C          | -4.79893800 | -2.02151900 | 2.30837100  |
| H          | -5.44177700 | -2.39473700 | 3.10421600  |
| C          | -3.56156100 | -2.63884600 | 2.08650700  |
| C          | -2.75418500 | -2.15955000 | 1.04967100  |
| H          | -1.80291000 | -2.64500400 | 0.85194700  |
| C          | -6.55457400 | -0.26520900 | 1.80652400  |
| H          | -7.22825900 | -0.91368600 | 2.37675400  |
| H          | -7.06277600 | 0.01958000  | 0.87838600  |
| H          | -6.40621700 | 0.65315000  | 2.38991000  |
| C          | -3.10420600 | -3.80238700 | 2.93716400  |
| H          | -3.84325000 | -4.05147200 | 3.70558100  |
| H          | -2.15675500 | -3.57411300 | 3.44057100  |
| H          | -2.93817500 | -4.70080100 | 2.32951100  |
| C          | -3.16518700 | 0.56172300  | -2.14353600 |
| C          | -3.99664400 | 0.08772500  | -3.16398300 |
| H          | -4.00881000 | -0.97080700 | -3.40240300 |
| C          | -4.81648600 | 0.95830200  | -3.89815600 |
| C          | -4.79030600 | 2.31981500  | -3.59102000 |
| H          | -5.41652300 | 3.00486000  | -4.16054600 |
| C          | -3.96889200 | 2.82937500  | -2.57503100 |

|   |             |             |             |    |             |             |             |
|---|-------------|-------------|-------------|----|-------------|-------------|-------------|
| C | -3.16218500 | 1.93841100  | -1.86119300 | C  | -2.12577000 | 0.58733600  | 3.42034500  |
| H | -2.51082500 | 2.31791600  | -1.08044100 | H  | -1.68388500 | -0.29421200 | 3.87195200  |
| C | -5.69072800 | 0.42325000  | -5.00980000 | C  | -3.29271100 | 1.12456700  | 3.98378400  |
| H | -6.30616600 | -0.41655500 | -4.66571400 | C  | -3.84305600 | 2.27495400  | 3.41430600  |
| H | -5.08610900 | 0.05475200  | -5.84823200 | H  | -4.73527600 | 2.71404900  | 3.85830000  |
| H | -6.36192400 | 1.19581700  | -5.39847700 | C  | -3.26735800 | 2.88591300  | 2.29142400  |
| C | -3.96097100 | 4.31100600  | -2.27262900 | C  | -2.11050100 | 2.32176000  | 1.74674800  |
| H | -4.89770100 | 4.62899300  | -1.79623600 | H  | -1.63509600 | 2.80482900  | 0.89672500  |
| H | -3.85065500 | 4.90384400  | -3.18836200 | C  | -3.89295300 | 4.11981100  | 1.68170900  |
| C | 1.24110600  | 1.93369300  | 1.99905000  | H  | -4.40995600 | 4.72146900  | 2.43723200  |
| C | 2.57361800  | 1.83245500  | 1.56826900  | H  | -4.63285900 | 3.85317800  | 0.91527500  |
| H | 2.87642000  | 0.98952900  | 0.95671400  | H  | -3.14183900 | 4.75543100  | 1.20057600  |
| C | 3.52172800  | 2.80531500  | 1.90854500  | C  | -3.93497200 | 0.46090300  | 5.17990200  |
| C | 3.11865400  | 3.89378700  | 2.69180100  | H  | -3.18622200 | 0.15915900  | 5.92129700  |
| H | 3.85076600  | 4.65152100  | 2.96737700  | H  | -4.47455600 | -0.44589600 | 4.87822600  |
| C | 1.80017900  | 4.02265600  | 3.13770100  | H  | -4.65101500 | 1.12664400  | 5.67307200  |
| C | 0.87219300  | 3.03035200  | 2.79177200  | Ru | 0.14747700  | 0.03996400  | -0.74331800 |
| H | -0.14377500 | 3.12300700  | 3.15898300  | P  | -2.06815100 | -0.57970300 | -1.16030200 |
| C | 4.94747400  | 2.69118800  | 1.41752300  | P  | 0.06337400  | 0.54256000  | 1.57296500  |
| H | 5.24137700  | 1.64482800  | 1.28607500  | H  | -3.14090900 | 4.57891000  | -1.59943000 |
| H | 5.65041900  | 3.15924400  | 2.11570500  | H  | -0.10280400 | 1.67969300  | -1.06957000 |
| H | 5.06972200  | 3.18815800  | 0.44620100  | C  | 2.16772100  | -1.58685700 | -0.65566700 |
| C | 1.37466900  | 5.21398900  | 3.96700300  | C  | 3.31601800  | -2.56979500 | -0.78705700 |
| H | 1.02196000  | 6.03772300  | 3.33144100  | C  | 4.62618700  | -2.07865100 | -0.14094100 |
| H | 2.20495400  | 5.60167100  | 4.56738600  | C  | 5.76617900  | -3.05722000 | -0.32710700 |
| H | 0.55520000  | 4.95752700  | 4.64726100  | C  | 5.98886000  | -4.08759800 | 0.59708300  |
| C | 0.61515200  | -0.73094900 | 2.81205900  | C  | 7.01913800  | -5.01077600 | 0.41113800  |
| C | 1.02776900  | -0.36250900 | 4.10480900  | C  | 7.84923500  | -4.91834800 | -0.70788100 |
| H | 1.03356000  | 0.68518500  | 4.39131000  | C  | 7.64079200  | -3.89591700 | -1.63590500 |
| C | 1.44581000  | -1.32118100 | 5.03032400  | C  | 6.60895800  | -2.97547300 | -1.44458200 |
| C | 1.45294600  | -2.66954800 | 4.64150500  | H  | 3.00070800  | -3.52965900 | -0.36433300 |
| H | 1.78888700  | -3.42349100 | 5.35244300  | H  | 3.47672100  | -2.74381200 | -1.86028500 |
| C | 1.05757200  | -3.06688700 | 3.36267400  | H  | 4.88305700  | -1.10728600 | -0.57545600 |
| C | 0.63854100  | -2.08192400 | 2.45272900  | H  | 5.34991300  | -4.16233600 | 1.47484100  |
| H | 0.37710200  | -2.36429300 | 1.43939700  | H  | 7.17666600  | -5.79943200 | 1.14275100  |
| C | 1.90160200  | -0.92123200 | 6.41579600  | H  | 8.65447200  | -5.63373400 | -0.85309800 |
| H | 1.77833500  | 0.15358100  | 6.58154300  | H  | 8.28519700  | -3.81105900 | -2.50738000 |
| H | 2.96088400  | -1.16193500 | 6.57214600  | H  | 6.45650600  | -2.17756100 | -2.16864600 |
| H | 1.33497800  | -1.44872200 | 7.19332100  | O  | 0.96904900  | -2.01829300 | -0.63273700 |
| C | 1.07223000  | -4.52455700 | 2.95841800  | O  | 2.38892000  | -0.33796900 | -0.59674000 |
| H | 0.08835100  | -4.99064600 | 3.10384700  | H  | 4.45142100  | -1.90793300 | 0.92854400  |
| H | 1.79384700  | -5.09782800 | 3.55036600  | H  | -0.83081700 | 1.71940200  | -2.87112100 |
| H | 1.32793700  | -4.64079200 | 1.89972800  | C  | 0.20469200  | 1.48934900  | -2.57894700 |
| C | -1.52125400 | 1.17618300  | 2.30633900  | C  | 1.13445500  | 2.68597800  | -2.76941500 |



|             |             |             |             |   |             |             |             |
|-------------|-------------|-------------|-------------|---|-------------|-------------|-------------|
| C           | 2.55921600  | 2.51182000  | -2.22329000 | H | 1.69627600  | -2.26031200 | 1.54887900  |
| C           | 3.44386400  | 3.69471900  | -2.55437900 | C | 6.75156700  | -1.08507000 | 0.05724600  |
| C           | 3.56878200  | 4.77212900  | -1.66433300 | H | 7.43693700  | -1.91642000 | 0.25342600  |
| C           | 4.35928800  | 5.87928000  | -1.98066600 | H | 7.13389200  | -0.20052000 | 0.57941500  |
| C           | 5.04084900  | 5.93023500  | -3.19811000 | H | 6.79185700  | -0.86887200 | -1.01847000 |
| C           | 4.92721700  | 4.86428500  | -4.09354400 | C | 3.21187900  | -4.50613000 | 1.25738300  |
| C           | 4.13711100  | 3.75957700  | -3.77190500 | H | 4.07915000  | -5.17052100 | 1.33222000  |
| H           | 1.17518200  | 2.84954900  | -3.85757200 | H | 2.59796500  | -4.85321000 | 0.41598100  |
| H           | 0.66141100  | 3.57941800  | -2.34163000 | H | 2.61144000  | -4.62957600 | 2.16594400  |
| H           | 2.50498500  | 2.37571800  | -1.13915700 | C | 2.75686900  | 2.19760100  | 1.24485800  |
| H           | 3.04564800  | 4.73685400  | -0.71078700 | C | 3.58873300  | 2.64212300  | 2.28507200  |
| H           | 4.44491800  | 6.70097400  | -1.27363700 | H | 3.67155800  | 2.05794600  | 3.19635700  |
| H           | 5.65856000  | 6.78982100  | -3.44508600 | C | 4.30904200  | 3.83588600  | 2.17759500  |
| H           | 5.45888200  | 4.89047200  | -5.04164000 | C | 4.18868000  | 4.58916600  | 1.00213400  |
| H           | 4.05934900  | 2.92995900  | -4.47194200 | H | 4.74125500  | 5.52317600  | 0.91183500  |
| O           | 0.63460200  | 0.28866100  | -2.83649800 | C | 3.36896300  | 4.17777500  | -0.05218100 |
| H           | 2.97880600  | 1.58736200  | -2.63142900 | C | 2.65710700  | 2.97734900  | 0.08668400  |
| <b>Int9</b> |             |             |             | H | 2.00269900  | 2.65579400  | -0.71716000 |
| C           | 1.58400200  | 0.44449900  | 3.21842100  | C | 5.17393700  | 4.32313200  | 3.31816300  |
| C           | 0.49563500  | 1.08231300  | 3.82405800  | H | 5.42363300  | 3.50941100  | 4.00647900  |
| H           | -0.21791000 | 1.61734500  | 3.20279900  | H | 4.66059600  | 5.09916600  | 3.90127100  |
| C           | 0.31470100  | 1.02661500  | 5.21443200  | H | 6.11092600  | 4.75988000  | 2.95400600  |
| C           | 1.23973500  | 0.32267700  | 5.98771400  | C | 3.25660100  | 4.99868500  | -1.31745800 |
| H           | 1.10248800  | 0.27267900  | 7.06718300  | H | 3.92463300  | 4.61948300  | -2.10222000 |
| C           | 2.34030300  | -0.32416200 | 5.40832600  | H | 3.52363000  | 6.04558400  | -1.13960700 |
| C           | 2.50256700  | -0.25477200 | 4.02194700  | C | -0.60596900 | -0.10688000 | -3.09247800 |
| H           | 3.35331900  | -0.75444100 | 3.57087200  | C | -1.94810700 | 0.25949300  | -2.91883400 |
| C           | -0.87136900 | 1.71728700  | 5.84942500  | H | -2.42720800 | 0.10178300  | -1.95829900 |
| H           | -0.87903200 | 1.58500100  | 6.93653500  | C | -2.69074300 | 0.81287100  | -3.97210600 |
| H           | -1.81614900 | 1.32450200  | 5.45446500  | C | -2.06857800 | 0.99357600  | -5.21034600 |
| H           | -0.86386200 | 2.79423000  | 5.64105700  | H | -2.63783200 | 1.42182200  | -6.03412700 |
| C           | 3.32526000  | -1.08322500 | 6.26948900  | C | -0.73233900 | 0.62993700  | -5.41857600 |
| H           | 4.13966000  | -1.50268300 | 5.67002800  | C | -0.01381900 | 0.07549000  | -4.35340600 |
| H           | 2.83886200  | -1.91386500 | 6.79681400  | H | 1.01768700  | -0.21652000 | -4.51869800 |
| H           | 3.77190600  | -0.43652000 | 7.03544500  | C | -4.13353300 | 1.21166000  | -3.75718600 |
| C           | 3.08530700  | -0.68913000 | 1.05149100  | H | -4.70437500 | 0.40134100  | -3.28867700 |
| C           | 4.39978700  | -0.39481500 | 0.67662400  | H | -4.62297200 | 1.46766200  | -4.70269800 |
| H           | 4.70698900  | 0.63728200  | 0.53968000  | H | -4.21414600 | 2.08346700  | -3.09534400 |
| C           | 5.34088700  | -1.41628700 | 0.48683400  | C | -0.07655400 | 0.84503200  | -6.76454300 |
| C           | 4.94233200  | -2.74085200 | 0.69155200  | H | -0.73269300 | 0.53308400  | -7.58565100 |
| H           | 5.67162200  | -3.53970500 | 0.56558100  | H | 0.85924900  | 0.28277400  | -6.84775700 |
| C           | 3.63127500  | -3.06677100 | 1.06282300  | H | 0.16080700  | 1.90472600  | -6.92877100 |
| C           | 2.71122000  | -2.02862200 | 1.23772600  | C | -0.23276100 | -2.64361200 | -1.78082300 |
|             |             |             |             | C | -0.58097800 | -3.20755300 | -3.01850800 |

|    |             |             |             |
|----|-------------|-------------|-------------|
| H  | -0.55880800 | -2.59577200 | -3.91532700 |
| C  | -0.96758000 | -4.54754000 | -3.12247700 |
| C  | -1.00094800 | -5.32690900 | -1.95887400 |
| H  | -1.30731800 | -6.36989800 | -2.02726300 |
| C  | -0.66177000 | -4.79639800 | -0.71066200 |
| C  | -0.27849100 | -3.44883600 | -0.63477200 |
| H  | -0.04989100 | -3.01822600 | 0.33319900  |
| C  | -1.37357400 | -5.13480100 | -4.45564500 |
| H  | -0.98666600 | -4.53949400 | -5.28898100 |
| H  | -2.46639100 | -5.16954600 | -4.55842900 |
| H  | -1.00596100 | -6.16083800 | -4.57203300 |
| C  | -0.69479700 | -5.65797300 | 0.53247900  |
| H  | 0.26193400  | -6.17499600 | 0.68708000  |
| H  | -1.47136700 | -6.42776300 | 0.46599500  |
| H  | -0.88689500 | -5.05779200 | 1.42791300  |
| C  | 2.04104700  | -0.92347600 | -2.28916600 |
| C  | 2.71812600  | -2.12275500 | -2.53562500 |
| H  | 2.22664200  | -3.07053100 | -2.34115100 |
| C  | 4.02378400  | -2.12604400 | -3.04425800 |
| C  | 4.63999900  | -0.90107300 | -3.31886400 |
| H  | 5.64677600  | -0.89340900 | -3.73362900 |
| C  | 3.99297200  | 0.31691600  | -3.07605500 |
| C  | 2.69567100  | 0.28768900  | -2.55487500 |
| H  | 2.17504500  | 1.22480900  | -2.37849300 |
| C  | 4.67849200  | 1.63441000  | -3.36065200 |
| H  | 5.62719200  | 1.48644600  | -3.88677900 |
| H  | 4.89338300  | 2.17645100  | -2.43067400 |
| H  | 4.05117800  | 2.28889200  | -3.97796400 |
| C  | 4.74943200  | -3.43163400 | -3.27389300 |
| H  | 4.08370600  | -4.19241500 | -3.69694800 |
| H  | 5.13951800  | -3.83210900 | -2.32883200 |
| H  | 5.59769000  | -3.30638200 | -3.95519400 |
| Ru | -0.25143100 | 0.39139600  | 0.31073500  |
| P  | 1.80400800  | 0.60584600  | 1.37727200  |
| P  | 0.30082100  | -0.86535700 | -1.64487200 |
| H  | 2.23841000  | 4.97371000  | -1.72163300 |
| H  | -0.19332800 | 2.02646400  | -0.51281600 |
| C  | -2.14234700 | -1.16971400 | 1.05662500  |
| C  | -3.21223500 | -2.07837500 | 1.62291900  |
| C  | -4.56808900 | -1.36479600 | 1.80840200  |
| C  | -5.64780900 | -2.29939900 | 2.31050900  |
| C  | -6.46684400 | -2.99866700 | 1.41297400  |
| C  | -7.44295300 | -3.88509500 | 1.87124500  |
| C  | -7.61764100 | -4.08780400 | 3.24174400  |

|   |             |             |             |
|---|-------------|-------------|-------------|
| C | -6.80977400 | -3.39718900 | 4.14755600  |
| C | -5.83525200 | -2.51218700 | 3.68350000  |
| H | -3.33468000 | -2.91943400 | 0.92628400  |
| H | -2.85268900 | -2.49462100 | 2.56914800  |
| H | -4.43585900 | -0.53228200 | 2.51031200  |
| H | -6.34037500 | -2.84108100 | 0.34370000  |
| H | -8.07070200 | -4.41324500 | 1.15782700  |
| H | -8.37974300 | -4.77443000 | 3.60092600  |
| H | -6.94130500 | -3.54354300 | 5.21675900  |
| H | -5.21333100 | -1.97312300 | 4.39539600  |
| O | -0.94642600 | -1.24360800 | 1.50803900  |
| O | -2.40164200 | -0.34819800 | 0.12790600  |
| H | -4.85992300 | -0.92406000 | 0.84986400  |
| H | -0.02560700 | 3.46493300  | 0.52044600  |
| C | -0.80378000 | 2.70058600  | 0.33433500  |
| C | -1.98259200 | 3.26727100  | -0.46478100 |
| C | -2.79649500 | 4.26662500  | 0.38227900  |
| C | -3.99481600 | 4.81504900  | -0.36178300 |
| C | -5.17450100 | 4.06232400  | -0.46884800 |
| C | -6.27286300 | 4.54590200  | -1.18126100 |
| C | -6.21254700 | 5.79688000  | -1.80061600 |
| C | -5.04649300 | 6.55749300  | -1.70024100 |
| C | -3.94977700 | 6.06805400  | -0.98751000 |
| H | -1.61539000 | 3.75930700  | -1.37617600 |
| H | -2.62717700 | 2.43725500  | -0.77109200 |
| H | -3.11676600 | 3.74958700  | 1.29373700  |
| H | -5.23097800 | 3.09132300  | 0.01890400  |
| H | -7.17900700 | 3.94872300  | -1.24690800 |
| H | -7.06864100 | 6.17657100  | -2.35224500 |
| H | -4.99056700 | 7.53467500  | -2.17369300 |
| H | -3.04546000 | 6.66847600  | -0.91022400 |
| O | -1.12785300 | 1.96897200  | 1.41560200  |
| H | -2.14480600 | 5.09339900  | 0.69590000  |

**Int10**

|   |             |             |             |
|---|-------------|-------------|-------------|
| C | -0.35373900 | -0.66107300 | -2.96526300 |
| C | 0.77639000  | -1.47734900 | -2.78992700 |
| H | 1.43932800  | -1.30013400 | -1.95042400 |
| C | 1.07345500  | -2.50094000 | -3.69480000 |
| C | 0.20896400  | -2.71360600 | -4.77808900 |
| H | 0.43111600  | -3.51001000 | -5.48741300 |
| C | -0.92423000 | -1.92065100 | -4.97677100 |
| C | -1.18901900 | -0.88704700 | -4.06607700 |
| H | -2.05684600 | -0.25731200 | -4.23191200 |

|   |             |             |             |   |             |             |             |
|---|-------------|-------------|-------------|---|-------------|-------------|-------------|
| C | 2.31347500  | -3.35029000 | -3.52282300 | C | -1.34661900 | -0.75639200 | 5.42762000  |
| H | 2.08081000  | -4.42061900 | -3.57969700 | C | -1.20411600 | 0.39901200  | 6.21214500  |
| H | 2.79479200  | -3.16024600 | -2.55859300 | H | -1.03481100 | 0.29609000  | 7.28298500  |
| H | 3.05136800  | -3.14065800 | -4.30840100 | C | -1.27902500 | 1.67459600  | 5.65299800  |
| C | -1.85915600 | -2.17869500 | -6.13739700 | C | -1.50339300 | 1.79312100  | 4.27081000  |
| H | -2.35797200 | -1.25916400 | -6.46230900 | H | -1.57875600 | 2.78599000  | 3.84018700  |
| H | -2.64568100 | -2.89525300 | -5.86430100 | C | -1.29573700 | -2.12936400 | 6.05986100  |
| H | -1.32518000 | -2.59681400 | -6.99780100 | H | -2.26267100 | -2.39884400 | 6.50601500  |
| C | -2.30570400 | 1.35650300  | -2.22145900 | H | -0.54818400 | -2.17500200 | 6.86013400  |
| C | -2.53261600 | 2.65247200  | -2.69950400 | H | -1.05008200 | -2.89937500 | 5.32150800  |
| H | -1.70171100 | 3.33786800  | -2.82499600 | C | -1.11096800 | 2.91298800  | 6.50499400  |
| C | -3.82199300 | 3.08814200  | -3.03156800 | H | -0.13261600 | 3.38338300  | 6.33906000  |
| C | -4.88754100 | 2.19343400  | -2.89562900 | H | -1.18530600 | 2.67766600  | 7.57179700  |
| H | -5.89100000 | 2.51503900  | -3.16973900 | H | -1.87242200 | 3.66678800  | 6.27222800  |
| C | -4.69458500 | 0.88753100  | -2.42666700 | C | -3.55080300 | -0.21787800 | 1.61291500  |
| C | -3.39805200 | 0.48625000  | -2.08478300 | C | -4.58763700 | 0.15766600  | 2.48881600  |
| H | -3.23515700 | -0.52620400 | -1.73026400 | H | -4.45890600 | 1.02002000  | 3.13695400  |
| C | -4.04382300 | 4.50186500  | -3.51928100 | C | -5.77784300 | -0.56618200 | 2.55306800  |
| H | -5.04805500 | 4.63007300  | -3.93646600 | C | -5.91422700 | -1.70212700 | 1.73790600  |
| H | -3.31839300 | 4.77728600  | -4.29368200 | H | -6.83324500 | -2.28402400 | 1.79124900  |
| H | -3.92916600 | 5.22292300  | -2.69951500 | C | -4.89603300 | -2.11500200 | 0.87842300  |
| C | -5.85534900 | -0.07347000 | -2.30327300 | C | -3.71274900 | -1.35545000 | 0.82042400  |
| H | -6.79858100 | 0.40220800  | -2.59103700 | H | -2.89753500 | -1.67135600 | 0.17850900  |
| H | -5.96022600 | -0.44149800 | -1.27609900 | C | -6.89825200 | -0.14746400 | 3.47801600  |
| H | -5.71633400 | -0.95116800 | -2.94735100 | H | -7.76552700 | 0.22180000  | 2.91489300  |
| C | 0.48631200  | 2.05800600  | -2.49234200 | H | -6.57921100 | 0.65064000  | 4.15582800  |
| C | 1.13694500  | 1.88582800  | -3.72491900 | H | -7.24757900 | -0.98800500 | 4.08965700  |
| H | 1.02154000  | 0.95715100  | -4.27258100 | C | -5.04267000 | -3.36296900 | 0.03671900  |
| C | 1.93771600  | 2.89412500  | -4.27010400 | H | -4.30418900 | -4.12318400 | 0.31971600  |
| C | 2.07282800  | 4.09711200  | -3.56397700 | H | -4.88738100 | -3.15129300 | -1.02816300 |
| H | 2.68460300  | 4.89426400  | -3.98404400 | H | -6.03716500 | -3.80695400 | 0.14887300  |
| C | 1.43522400  | 4.30236600  | -2.33717000 | C | -2.43187000 | 2.47851900  | 1.31669700  |
| C | 0.64745600  | 3.26909900  | -1.80649300 | C | -3.72095500 | 2.86038400  | 0.93518200  |
| H | 0.15620500  | 3.41375400  | -0.84997300 | H | -4.48867400 | 2.10898900  | 0.78635900  |
| C | 2.65004800  | 2.69097500  | -5.58859400 | C | -4.04831300 | 4.21001500  | 0.72920000  |
| H | 2.50477800  | 3.54647500  | -6.25908600 | C | -3.05936900 | 5.17547900  | 0.92121100  |
| H | 2.28871900  | 1.79451000  | -6.10194600 | H | -3.30724200 | 6.22640300  | 0.77897100  |
| H | 3.73208700  | 2.57533700  | -5.44381900 | C | -1.75263800 | 4.82498900  | 1.29318000  |
| C | 1.58255500  | 5.61208900  | -1.59566200 | C | -1.44474500 | 3.47261800  | 1.46562700  |
| H | 0.62079200  | 6.13300400  | -1.50975000 | H | -0.42696100 | 3.18729200  | 1.71566000  |
| H | 2.27995400  | 6.28378900  | -2.10666900 | C | -0.71203000 | 5.89525500  | 1.53505000  |
| C | -1.64028200 | 0.66234600  | 3.46269600  | H | 0.29754200  | 5.47362000  | 1.55854100  |
| C | -1.55969300 | -0.60922400 | 4.05703400  | H | -0.88008500 | 6.39968300  | 2.49606300  |
| H | -1.65881300 | -1.49931000 | 3.44268900  | H | -0.74038000 | 6.66901100  | 0.75898000  |



|   |             |             |             |    |             |             |             |
|---|-------------|-------------|-------------|----|-------------|-------------|-------------|
| H | 1.36361600  | -4.96900700 | 3.91989000  | H  | -3.39590300 | 5.90421800  | -3.10170000 |
| C | 0.86639800  | -0.44891600 | 2.39937700  | H  | -3.76042200 | 4.42961300  | -2.18528000 |
| C | 0.70995900  | 0.09560300  | 3.67568900  | H  | -3.16369600 | 4.31386100  | -3.84023000 |
| H | -0.27557000 | 0.38367800  | 4.02715300  | C  | 1.37752300  | 7.17067000  | -2.10836300 |
| C | 1.81231100  | 0.26824300  | 4.52737800  | H  | 2.36984000  | 6.99413900  | -1.68152100 |
| C | 3.06842700  | -0.14658800 | 4.08373300  | H  | 0.93090100  | 8.02009000  | -1.57641000 |
| H | 3.92569600  | -0.04507100 | 4.74814000  | H  | 1.51331400  | 7.48179400  | -3.15201300 |
| C | 3.25504900  | -0.69949700 | 2.80721500  | C  | 2.47568600  | 1.85901400  | -1.45409800 |
| C | 2.14928200  | -0.82743200 | 1.96242400  | C  | 2.55007600  | 2.22466400  | -2.80663400 |
| H | 2.26201300  | -1.24169700 | 0.96387800  | H  | 1.69979400  | 2.69949400  | -3.28695200 |
| C | 1.63530700  | 0.90383400  | 5.88684800  | C  | 3.71037800  | 2.00423400  | -3.56003500 |
| H | 0.69468800  | 0.59467700  | 6.35639300  | C  | 4.80941500  | 1.40909100  | -2.93210900 |
| H | 1.61278400  | 1.99855100  | 5.80329600  | H  | 5.72205800  | 1.24406800  | -3.50238400 |
| H | 2.45524200  | 0.64127800  | 6.56385100  | C  | 4.76351900  | 1.01524500  | -1.58954300 |
| C | 4.62606600  | -1.17566300 | 2.38267900  | C  | 3.58303300  | 1.22951500  | -0.86576800 |
| H | 4.98261600  | -1.98500800 | 3.03284600  | H  | 3.53027900  | 0.89809800  | 0.16639100  |
| H | 5.36968100  | -0.37077300 | 2.44256700  | C  | 3.78272800  | 2.44303600  | -5.00517600 |
| H | 4.62166000  | -1.55462800 | 1.35665300  | H  | 4.08049500  | 3.49723600  | -5.08510000 |
| C | -2.04349800 | -0.47028100 | 2.35638500  | H  | 2.81280200  | 2.34169200  | -5.50372300 |
| C | -2.43485700 | -1.38220400 | 3.35204900  | H  | 4.51542000  | 1.85352400  | -5.56618900 |
| H | -1.88289300 | -2.30759300 | 3.48385900  | C  | 5.95872400  | 0.34190100  | -0.95380200 |
| C | -3.53453600 | -1.12635000 | 4.17479100  | H  | 6.89733700  | 0.71920400  | -1.37441800 |
| C | -4.24758000 | 0.06732200  | 3.98952800  | H  | 5.94062200  | -0.74288800 | -1.12259400 |
| H | -5.11030500 | 0.27288500  | 4.62178400  | H  | 5.98307000  | 0.50391700  | 0.12828200  |
| C | -3.88819000 | 0.99136100  | 3.00619700  | C  | 1.27742300  | 2.81864600  | 1.09133200  |
| C | -2.78066100 | 0.70768700  | 2.19126000  | C  | 2.55157900  | 3.25488900  | 1.47534200  |
| H | -2.52497100 | 1.38876400  | 1.38822800  | H  | 3.40576400  | 3.08559400  | 0.82892600  |
| C | -3.96578700 | -2.12113700 | 5.22895100  | C  | 2.74916200  | 3.92655400  | 2.68890500  |
| H | -3.22956700 | -2.92226600 | 5.34775100  | C  | 1.64233400  | 4.18142900  | 3.50563700  |
| H | -4.92366700 | -2.58890200 | 4.96674100  | H  | 1.78507100  | 4.71914800  | 4.44174400  |
| H | -4.10055000 | -1.63923700 | 6.20494200  | C  | 0.35451400  | 3.77138700  | 3.14231400  |
| C | -4.66499800 | 2.27510700  | 2.81605700  | C  | 0.19105500  | 3.08289400  | 1.93601800  |
| H | -5.67026300 | 2.20332600  | 3.24453800  | H  | -0.80535500 | 2.76449500  | 1.64371500  |
| H | -4.76269400 | 2.52470800  | 1.75380400  | C  | -0.84131800 | 4.08519400  | 4.01303900  |
| C | 0.18642300  | 3.60606700  | -1.36024300 | H  | -1.41220000 | 4.93288800  | 3.61128500  |
| C | -1.12941400 | 3.66315400  | -1.82465700 | H  | -0.53865500 | 4.34820900  | 5.03205600  |
| H | -1.77789600 | 2.79856000  | -1.72962100 | H  | -1.52631700 | 3.23171000  | 4.07102800  |
| C | -1.64417400 | 4.84404700  | -2.38971000 | C  | 4.13731400  | 4.34965300  | 3.11320200  |
| C | -0.81759400 | 5.96325800  | -2.47465900 | H  | 4.77352800  | 4.56447000  | 2.24779200  |
| H | -1.20944000 | 6.88250900  | -2.90791400 | H  | 4.63234000  | 3.55795100  | 3.69167500  |
| C | 0.50704600  | 5.93832100  | -2.00817000 | H  | 4.10951600  | 5.24448500  | 3.74448900  |
| C | 0.99296700  | 4.75612600  | -1.45155800 | Ru | -0.54389600 | 0.21035900  | -0.86332100 |
| H | 2.01406700  | 4.73132800  | -1.08107600 | P  | -0.56569400 | -0.78683000 | 1.28037000  |
| C | -3.06573000 | 4.87908700  | -2.90397400 | P  | 0.86709500  | 2.06377200  | -0.55616000 |

|   |             |             |             |
|---|-------------|-------------|-------------|
| H | -4.16222000 | 3.12281600  | 3.30072300  |
| H | 0.01687800  | -2.23529100 | -2.38606300 |
| C | -3.10609700 | -0.04261300 | -1.30782300 |
| C | -4.58067800 | -0.12721800 | -1.65268000 |
| C | -5.11680700 | -1.56450100 | -1.78595000 |
| C | -6.57815900 | -1.59630400 | -2.18140000 |
| C | -7.58812800 | -1.56156000 | -1.20974200 |
| C | -8.93576000 | -1.55510400 | -1.57333500 |
| C | -9.29762100 | -1.58353200 | -2.92175300 |
| C | -8.30235000 | -1.62037500 | -3.90049000 |
| C | -6.95629300 | -1.62727400 | -3.53103000 |
| H | -5.13932900 | 0.43406300  | -0.89532500 |
| H | -4.72736500 | 0.41488900  | -2.59776900 |
| H | -4.51023000 | -2.09716900 | -2.52546500 |
| H | -7.31340300 | -1.54466400 | -0.15683600 |
| H | -9.70305600 | -1.53266500 | -0.80349900 |
| H | 10.34625500 | -1.58203400 | -3.20735800 |
| H | -8.57366100 | -1.64938500 | -4.95282100 |
| H | -6.18625800 | -1.66295400 | -4.29909800 |
| O | -2.63241800 | 1.04236200  | -0.83740400 |
| O | -2.32863200 | -1.02626400 | -1.51266300 |
| H | -4.97455500 | -2.08615400 | -0.83181600 |
| C | 1.02314200  | -1.80623600 | -2.24455300 |
| C | 2.03688500  | -2.96607200 | -2.20686500 |
| C | 3.50251800  | -2.50834900 | -2.10414000 |
| C | 4.48153800  | -3.65556200 | -1.97896300 |
| C | 5.22233800  | -4.10322200 | -3.08154900 |
| C | 6.11093800  | -5.17471000 | -2.96780800 |
| C | 6.27660500  | -5.82103700 | -1.74184000 |
| C | 5.54549400  | -5.38706100 | -0.63315800 |
| C | 4.65873700  | -4.31665800 | -0.75325800 |
| H | 1.96056600  | -0.43432100 | -3.26269000 |
| H | 1.78450600  | -3.59653500 | -1.34544400 |
| H | 1.90252500  | -3.57570700 | -3.10932000 |
| H | 3.75486200  | -1.91135400 | -2.98928600 |
| H | 5.10009000  | -3.60384500 | -4.04050600 |
| H | 6.67541400  | -5.50249900 | -3.83741300 |
| H | 6.96930700  | -6.65359300 | -1.64985200 |
| H | 5.66838300  | -5.88176600 | 0.32738800  |
| H | 4.08974800  | -3.98791700 | 0.11427800  |
| O | 1.12294100  | -1.03717700 | -1.11820500 |
| O | 1.20210800  | -1.01444300 | -3.45284000 |
| H | 3.59205300  | -1.84200300 | -1.23938600 |
| H | -0.68867200 | 0.95361000  | -2.61683000 |

|             |             |             |             |
|-------------|-------------|-------------|-------------|
| H           | -0.19387300 | 0.36378700  | -2.78540900 |
| <b>TS5'</b> |             |             |             |
| C           | 0.65821700  | 2.56361600  | 1.57807400  |
| C           | 1.34163500  | 3.31415700  | 0.61160100  |
| H           | 1.83569700  | 2.80585100  | -0.20895200 |
| C           | 1.39212300  | 4.71269200  | 0.68390200  |
| C           | 0.73878400  | 5.35699400  | 1.73924600  |
| H           | 0.76644600  | 6.44432600  | 1.79914800  |
| C           | 0.04827600  | 4.63604500  | 2.71969400  |
| C           | 0.01867100  | 3.23925200  | 2.62954000  |
| H           | -0.51938000 | 2.68035300  | 3.38804500  |
| C           | 2.16055400  | 5.50540400  | -0.34996700 |
| H           | 2.21576500  | 4.96849000  | -1.30244600 |
| H           | 3.19210100  | 5.69174500  | -0.02155500 |
| H           | 1.69832200  | 6.48182000  | -0.53389600 |
| C           | -0.67502000 | 5.35314700  | 3.83816900  |
| H           | -1.63962400 | 5.75345900  | 3.49782800  |
| H           | -0.09106900 | 6.20039300  | 4.21600700  |
| H           | -0.87894000 | 4.68125700  | 4.67845300  |
| C           | -0.67926500 | 0.26860200  | 2.63695900  |
| C           | -0.46420200 | -0.39369600 | 3.84691500  |
| H           | 0.53712400  | -0.70796200 | 4.12298000  |
| C           | -1.52552900 | -0.65644100 | 4.72804400  |
| C           | -2.80318300 | -0.21281300 | 4.38527800  |
| H           | -3.62881300 | -0.38671100 | 5.07422700  |
| C           | -3.04877300 | 0.46053000  | 3.17854400  |
| C           | -1.98376100 | 0.67456800  | 2.30001500  |
| H           | -2.15046100 | 1.17906100  | 1.35178700  |
| C           | -1.28051300 | -1.41632200 | 6.01111400  |
| H           | -0.33900000 | -1.11403600 | 6.48375900  |
| H           | -1.21451300 | -2.49523600 | 5.81790600  |
| H           | -2.08869400 | -1.25840500 | 6.73326800  |
| C           | -4.43456700 | 0.97920500  | 2.86666500  |
| H           | -4.70077200 | 1.81715600  | 3.52464600  |
| H           | -5.19951000 | 0.20641700  | 3.01196900  |
| H           | -4.50591100 | 1.33654700  | 1.83492700  |
| C           | 2.22374700  | 0.29147600  | 2.40986700  |
| C           | 2.60936400  | 1.01924300  | 3.54921600  |
| H           | 2.00733300  | 1.85981800  | 3.88171600  |
| C           | 3.76504300  | 0.68983700  | 4.26065200  |
| C           | 4.54383400  | -0.38832600 | 3.81235500  |
| H           | 5.45125700  | -0.64872300 | 4.35588400  |
| C           | 4.19377900  | -1.12531000 | 2.67951800  |

|   |             |             |             |    |             |             |             |
|---|-------------|-------------|-------------|----|-------------|-------------|-------------|
| C | 3.02713600  | -0.77069600 | 1.98135900  | C  | -2.31903200 | -3.37956300 | 1.43871800  |
| H | 2.76917400  | -1.29727300 | 1.06870500  | H  | -3.23445300 | -3.19057300 | 0.88793100  |
| C | 4.18009400  | 1.47936100  | 5.48191400  | C  | -2.38604300 | -4.13743300 | 2.61634200  |
| H | 3.46147100  | 2.27402000  | 5.70517200  | C  | -1.20136000 | -4.41553000 | 3.30487500  |
| H | 5.16220700  | 1.94804000  | 5.34047100  | H  | -1.24228600 | -5.01965600 | 4.21000900  |
| H | 4.25640200  | 0.83718900  | 6.36851200  | C  | 0.03721800  | -3.94269300 | 2.85364000  |
| C | 5.04025000  | -2.28697100 | 2.20851200  | C  | 0.06984700  | -3.16783200 | 1.69037700  |
| H | 6.05497000  | -2.23642800 | 2.61724200  | H  | 1.02471900  | -2.79146600 | 1.33369300  |
| H | 5.11205200  | -2.30928700 | 1.11549400  | C  | 1.31534800  | -4.27985200 | 3.58790400  |
| C | -0.22711600 | -3.41197600 | -1.64539100 | H  | 1.83958100  | -5.11686100 | 3.10738100  |
| C | 0.92854400  | -3.30419600 | -2.42057000 | H  | 1.11768800  | -4.57108700 | 4.62507000  |
| H | 1.48530900  | -2.37483200 | -2.42379400 | H  | 2.00443500  | -3.42807600 | 3.59850000  |
| C | 1.39754900  | -4.39632400 | -3.17221700 | C  | -3.71943300 | -4.62262700 | 3.13818400  |
| C | 0.68396800  | -5.59348400 | -3.13413300 | H  | -4.39756100 | -4.89286300 | 2.32102300  |
| H | 1.04165000  | -6.44496000 | -3.71158800 | H  | -4.21871300 | -3.84248800 | 3.72855000  |
| C | -0.48149400 | -5.73220100 | -2.36260400 | H  | -3.60337700 | -5.49841900 | 3.78559100  |
| C | -0.92090800 | -4.63650800 | -1.62097600 | Ru | 0.44394700  | -0.06653300 | -0.83862100 |
| H | -1.81463200 | -4.73961600 | -1.01183500 | P  | 0.68276500  | 0.70112100  | 1.45768800  |
| C | 2.65338100  | -4.25759800 | -4.00283900 | P  | -0.85723600 | -1.97345900 | -0.63516200 |
| H | 2.94333400  | -5.21207300 | -4.45442400 | H  | 4.60871600  | -3.24761500 | 2.52015200  |
| H | 3.49372300  | -3.90104300 | -3.39526900 | H  | -0.21806300 | 2.42598700  | -2.15303300 |
| H | 2.51631300  | -3.53227300 | -4.81519600 | C  | 2.93252600  | 0.23474400  | -1.51067700 |
| C | -1.23786300 | -7.04164300 | -2.34428000 | C  | 4.36453700  | 0.31478500  | -2.00404400 |
| H | -2.04343300 | -7.02618300 | -1.60332400 | C  | 4.99724900  | 1.71080000  | -1.84683500 |
| H | -0.57659700 | -7.88306200 | -2.10337000 | C  | 6.39968900  | 1.77598200  | -2.41353200 |
| H | -1.68911400 | -7.25857100 | -3.32144000 | C  | 7.51548100  | 1.49190700  | -1.61399500 |
| C | -2.55583700 | -1.75373000 | -1.35691200 | C  | 8.80643900  | 1.52027800  | -2.14454600 |
| C | -2.75849000 | -2.03400600 | -2.71812300 | C  | 9.00410900  | 1.83490200  | -3.49048000 |
| H | -1.95024800 | -2.45910200 | -3.30577000 | C  | 7.90201600  | 2.12202000  | -4.29865000 |
| C | -3.99253300 | -1.79764800 | -3.33803600 | C  | 6.61371700  | 2.09274600  | -3.76258400 |
| C | -5.03680500 | -1.27481700 | -2.56627900 | H  | 4.95330900  | -0.44780500 | -1.48330700 |
| H | -6.00630100 | -1.10052900 | -3.03021200 | H  | 4.36212400  | 0.02912300  | -3.06585000 |
| C | -4.86507700 | -0.97023700 | -1.21123600 | H  | 4.35136600  | 2.44155300  | -2.34422200 |
| C | -3.61236600 | -1.19520500 | -0.62272000 | H  | 7.36963700  | 1.25184500  | -0.56266000 |
| H | -3.46335000 | -0.93023000 | 0.41953400  | H  | 9.65806400  | 1.30093900  | -1.50534500 |
| C | -4.20528200 | -2.14996300 | -4.79343000 | H  | 10.00847600 | 1.86080000  | -3.90496900 |
| H | -4.61903200 | -3.16184000 | -4.89839400 | H  | 8.04552100  | 2.37448900  | -5.34629700 |
| H | -3.26514100 | -2.12430600 | -5.35413500 | H  | 5.76026700  | 2.32445200  | -4.39675000 |
| H | -4.90810100 | -1.46132900 | -5.27511000 | O  | 2.47194200  | -0.88071400 | -1.09758100 |
| C | -6.00784300 | -0.38025100 | -0.41566400 | O  | 2.17468200  | 1.25272700  | -1.53623300 |
| H | -6.97407800 | -0.74998400 | -0.77600400 | H  | 5.01051200  | 1.97694000  | -0.78287700 |
| H | -6.02998000 | 0.71452700  | -0.49937500 | C  | -1.20689000 | 1.99294300  | -1.93616300 |
| H | -5.92641200 | -0.62547300 | 0.64766600  | C  | -2.30776400 | 3.03978900  | -2.08912800 |
| C | -1.09822100 | -2.88039700 | 0.96991000  | C  | -3.73848100 | 2.50116900  | -1.91187900 |

|   |             |             |             |   |             |             |            |
|---|-------------|-------------|-------------|---|-------------|-------------|------------|
| C | -4.78231200 | 3.59759900  | -1.93008400 | H | 2.67316700  | 0.20220600  | 5.68904200 |
| C | -5.37768100 | 4.00915000  | -3.13088500 | C | 2.67684900  | -0.06979600 | 3.55613200 |
| C | -6.32017400 | 5.03851600  | -3.15095300 | C | 1.87396400  | -0.30701000 | 2.43091600 |
| C | -6.68606800 | 5.67733600  | -1.96431400 | H | 2.33984800  | -0.37577800 | 1.45248200 |
| C | -6.10230500 | 5.27779500  | -0.76038900 | C | 0.02737100  | -0.00602600 | 6.32089900 |
| C | -5.16019200 | 4.24783200  | -0.74631200 | H | -0.21675600 | 1.03896600  | 6.55470500 |
| H | -2.09243300 | 0.50944100  | -3.14440300 | H | 0.69062600  | -0.36889200 | 7.11383400 |
| H | -2.10979900 | 3.79908000  | -1.32107700 | H | -0.90606800 | -0.57613300 | 6.37123300 |
| H | -2.19795700 | 3.53382900  | -3.06134200 | C | 4.17601700  | 0.07058000  | 3.41988000 |
| H | -3.96142000 | 1.77702500  | -2.70609000 | H | 4.64346300  | 0.28379700  | 4.38676600 |
| H | -5.10081600 | 3.51369800  | -4.05937600 | H | 4.44213900  | 0.87623000  | 2.72712900 |
| H | -6.77137000 | 5.33930800  | -4.09321500 | H | 4.62838800  | -0.84991200 | 3.02920800 |
| H | -7.42178500 | 6.47714800  | -1.97736300 | C | -2.23184500 | -0.90299200 | 1.69846700 |
| H | -6.38286300 | 5.76581500  | 0.16970000  | C | -2.88849900 | -2.08956900 | 2.05722200 |
| H | -4.70983300 | 3.94140600  | 0.19584100  | H | -2.39016900 | -3.04428200 | 1.92771900 |
| O | -1.28258700 | 1.21336200  | -0.88598600 | C | -4.18193200 | -2.06830900 | 2.59301900 |
| O | -1.28586400 | 1.04977300  | -3.27468100 | C | -4.80626300 | -0.82942500 | 2.78239000 |
| H | -3.78256500 | 1.95119100  | -0.96695600 | H | -5.80476500 | -0.79873800 | 3.21640400 |
| H | 0.26882800  | -0.42121600 | -2.54247300 | C | -4.17540900 | 0.37174600  | 2.43885800 |
| H | -0.42189700 | 0.25559800  | -2.89544200 | C | -2.88661600 | 0.32205600  | 1.89091800 |

**TS5a'**

|   |             |             |             |   |             |             |             |
|---|-------------|-------------|-------------|---|-------------|-------------|-------------|
| C | -0.13282100 | -2.69200600 | 0.80842700  | C | -4.89024000 | -3.35588200 | 2.95049800  |
| C | -0.78613600 | -3.37539600 | -0.23034400 | H | -4.17673600 | -4.15909500 | 3.16188000  |
| H | -1.47166500 | -2.83701000 | -0.87673800 | H | -5.53218900 | -3.69875500 | 2.12810500  |
| C | -0.57205400 | -4.74294100 | -0.44071800 | H | -5.53116500 | -3.23064500 | 3.83041400  |
| C | 0.31697200  | -5.42138000 | 0.40051500  | C | -4.87352300 | 1.69790500  | 2.63830500  |
| H | 0.49023400  | -6.48502400 | 0.24418900  | H | -4.17444500 | 2.46427900  | 2.98894900  |
| C | 0.99087000  | -4.76589500 | 1.43627400  | H | -5.68826500 | 1.61619000  | 3.36570200  |
| C | 0.74927600  | -3.40004700 | 1.63683300  | C | 0.98851100  | 3.45350000  | -1.87686300 |
| H | 1.25247200  | -2.89548600 | 2.45463800  | C | 1.53029300  | 3.02849800  | -3.09620600 |
| C | -1.26440300 | -5.46067500 | -1.57735900 | H | 1.80841800  | 1.98747800  | -3.22978200 |
| H | -1.42406900 | -6.51966200 | -1.34643800 | C | 1.73857100  | 3.92243100  | -4.15290900 |
| H | -0.66438600 | -5.41367100 | -2.49595300 | C | 1.38920600  | 5.26417900  | -3.97161800 |
| H | -2.23564500 | -5.00874600 | -1.80340000 | H | 1.53982900  | 5.96757800  | -4.78898200 |
| C | 1.97552600  | -5.51199500 | 2.30775100  | C | 0.85744600  | 5.72447000  | -2.76198500 |
| H | 2.12833800  | -5.00425100 | 3.26605300  | C | 0.67244900  | 4.81029500  | -1.71779100 |
| H | 2.95327100  | -5.58950600 | 1.81395600  | H | 0.27509000  | 5.17124400  | -0.77519000 |
| H | 1.63491100  | -6.53275600 | 2.51522200  | C | 2.34020600  | 3.43905700  | -5.45321600 |
| C | 0.48744900  | -0.47012500 | 2.55083600  | H | 2.28292000  | 4.20775500  | -6.23065900 |
| C | -0.09918600 | -0.38041100 | 3.82160900  | H | 1.82432500  | 2.54537900  | -5.82341800 |
| H | -1.16927200 | -0.51524800 | 3.93473800  | H | 3.39799600  | 3.17301400  | -5.32806100 |
| C | 0.67468100  | -0.12683600 | 4.95945700  | C | 0.46818500  | 7.17603200  | -2.59299500 |
| C | 2.05907000  | 0.02118500  | 4.80831600  | H | 0.44393800  | 7.46396100  | -1.53662400 |
|   |             |             |             | H | -0.52975100 | 7.37239300  | -3.00787200 |



|    |             |             |             |              |             |             |             |
|----|-------------|-------------|-------------|--------------|-------------|-------------|-------------|
| H  | 1.16846300  | 7.84220200  | -3.10944500 | C            | -7.26817900 | -1.23238900 | -0.95373600 |
| C  | 2.66341100  | 2.28003800  | 0.01237100  | C            | -8.64155600 | -1.20574500 | -1.20115300 |
| C  | 3.20597600  | 3.43438200  | 0.60308700  | C            | -9.12402100 | -1.39217300 | -2.49845200 |
| H  | 2.55688600  | 4.26280800  | 0.87089500  | C            | -8.22282500 | -1.60595900 | -3.54335300 |
| C  | 4.57689500  | 3.54646800  | 0.83996900  | C            | -6.85015600 | -1.63195100 | -3.29040700 |
| C  | 5.41001700  | 2.48708800  | 0.44867700  | H            | -4.75261400 | 0.65912300  | -1.11170900 |
| H  | 6.48343100  | 2.57041900  | 0.61209800  | H            | -4.41606000 | 0.38808300  | -2.81669300 |
| C  | 4.90328000  | 1.33664200  | -0.15967300 | H            | -4.34245400 | -2.08446300 | -2.43994100 |
| C  | 3.51567500  | 1.23833200  | -0.36825300 | H            | -6.89705800 | -1.09149700 | 0.05973400  |
| H  | 3.09436300  | 0.36467700  | -0.86168300 | H            | -9.33571400 | -1.04409900 | -0.38007900 |
| C  | 5.15604300  | 4.77613900  | 1.50231700  | H            | 10.19325500 | -1.37525000 | -2.69263600 |
| H  | 6.06669600  | 5.11312300  | 0.99365500  | H            | -8.58829400 | -1.75760800 | -4.55591600 |
| H  | 5.42620200  | 4.57759400  | 2.54809800  | H            | -6.15390700 | -1.80514000 | -4.10855700 |
| H  | 4.44144200  | 5.60544200  | 1.49922100  | O            | -2.25168000 | 1.04770500  | -0.99269200 |
| C  | 5.83179200  | 0.22758700  | -0.60007600 | O            | -2.01905400 | -0.97115600 | -1.81721900 |
| H  | 5.79686500  | 0.08709700  | -1.68743500 | H            | -4.66151100 | -1.84657100 | -0.72684300 |
| H  | 5.56295200  | -0.73414400 | -0.14758300 | C            | 1.37606300  | -1.88676400 | -2.77302800 |
| H  | 6.86947000  | 0.44532800  | -0.32719200 | C            | 2.27513200  | -2.98661800 | -2.18508500 |
| C  | -0.05561400 | 3.08948200  | 0.83129000  | C            | 3.78322600  | -2.71720800 | -2.34021400 |
| C  | 0.39209600  | 3.15283900  | 2.15833900  | C            | 4.64312400  | -3.78240200 | -1.69353600 |
| H  | 1.33907900  | 2.70093600  | 2.43445000  | C            | 5.26609100  | -4.77637200 | -2.45938300 |
| C  | -0.36923700 | 3.78716900  | 3.14844100  | C            | 6.04402700  | -5.76925300 | -1.85911000 |
| C  | -1.59467900 | 4.35952000  | 2.78912200  | C            | 6.21602700  | -5.78398600 | -0.47434800 |
| H  | -2.18967500 | 4.86161700  | 3.55054900  | C            | 5.60147800  | -4.79931300 | 0.30388900  |
| C  | -2.07777100 | 4.29753600  | 1.47596000  | C            | 4.82193800  | -3.81238100 | -0.30152100 |
| C  | -1.30572100 | 3.64278200  | 0.50953300  | H            | 2.46973100  | -1.22827700 | -4.22310100 |
| H  | -1.68838200 | 3.55436300  | -0.50198900 | H            | 2.02590400  | -3.10589200 | -1.12607900 |
| C  | -3.39187900 | 4.94155000  | 1.09506200  | H            | 2.02479600  | -3.93193300 | -2.68345200 |
| H  | -3.94012600 | 4.32903100  | 0.37110900  | H            | 4.03118900  | -2.65569800 | -3.40757600 |
| H  | -3.23155100 | 5.92424000  | 0.63167700  | H            | 5.14119700  | -4.77011500 | -3.54017200 |
| H  | -4.03384200 | 5.09378700  | 1.96900500  | H            | 6.51878000  | -6.52873700 | -2.47536500 |
| C  | 0.14195800  | 3.87529000  | 4.56871200  | H            | 6.82533600  | -6.55204600 | -0.00526800 |
| H  | 0.77368700  | 4.76281100  | 4.71064800  | H            | 5.73498600  | -4.79602200 | 1.38309000  |
| H  | 0.74617400  | 2.99961600  | 4.82729500  | H            | 4.33948900  | -3.05469100 | 0.31274600  |
| H  | -0.68251900 | 3.94726500  | 5.28654800  | O            | 1.55582900  | -0.67360700 | -2.09219500 |
| Ru | -0.25428600 | 0.25869700  | -1.10389200 | O            | 1.62266200  | -1.70051700 | -4.16653400 |
| P  | -0.49824400 | -0.88286500 | 1.03337700  | H            | 4.01272500  | -1.74063600 | -1.89939200 |
| P  | 0.87687000  | 2.20146300  | -0.49314100 | H            | -0.09674800 | 0.76083700  | -2.80937000 |
| H  | -5.30716600 | 2.06400500  | 1.69830400  | H            | 0.67038700  | 0.17582900  | -2.70029400 |
| H  | 0.33074600  | -2.21710200 | -2.73140100 |              |             |             |             |
| C  | -2.77158700 | 0.00991800  | -1.52546700 | <b>Int8'</b> |             |             |             |
| C  | -4.25730700 | -0.02323600 | -1.80980800 | C            | -1.68775900 | 0.46629200  | -2.59784200 |
| C  | -4.86223700 | -1.43888900 | -1.72454500 | C            | -2.79895500 | 1.04417000  | -1.96655000 |
| C  | -6.35187300 | -1.44465300 | -1.99373700 | H            | -2.96156800 | 0.87748100  | -0.90598800 |

|   |             |             |             |   |             |             |             |
|---|-------------|-------------|-------------|---|-------------|-------------|-------------|
| C | -3.71238600 | 1.82567000  | -2.68593100 | C | -1.19983700 | -5.38858300 | 0.64999300  |
| C | -3.48507700 | 2.03924800  | -4.04977500 | H | -0.12458800 | -5.53368100 | 0.49987300  |
| H | -4.19089500 | 2.64346900  | -4.61814100 | H | -1.70038000 | -6.35115700 | 0.50081200  |
| C | -2.37634200 | 1.48846400  | -4.70286900 | C | 2.97029400  | 0.53935800  | 2.76428300  |
| C | -1.48963300 | 0.69342900  | -3.96682700 | C | 2.56122700  | 1.70815100  | 3.41245400  |
| H | -0.64166800 | 0.24747400  | -4.47564000 | H | 1.81465800  | 2.34415200  | 2.94807500  |
| C | -4.91134400 | 2.43135000  | -1.99025400 | C | 3.08101700  | 2.07307100  | 4.66313900  |
| H | -5.66131300 | 2.77338400  | -2.71163400 | C | 4.02252300  | 1.23650700  | 5.26474400  |
| H | -4.62371900 | 3.29443600  | -1.37627300 | H | 4.42786500  | 1.50462900  | 6.23922000  |
| H | -5.39060900 | 1.70871700  | -1.32012200 | C | 4.45487000  | 0.05612100  | 4.64488600  |
| C | -2.13531800 | 1.75521100  | -6.17193200 | C | 3.92646900  | -0.27604500 | 3.39485100  |
| H | -1.48589200 | 0.99343200  | -6.61589600 | H | 4.25641300  | -1.19423400 | 2.92011200  |
| H | -1.64933000 | 2.72825600  | -6.32544000 | C | 2.62296200  | 3.34808600  | 5.33453300  |
| H | -3.07430800 | 1.77141700  | -6.73707500 | H | 2.92930100  | 4.23310000  | 4.76210700  |
| C | 0.71816700  | -1.12506000 | -2.82022700 | H | 3.04224400  | 3.44309000  | 6.34135900  |
| C | 0.68902100  | -2.37522400 | -3.45409000 | H | 1.53016800  | 3.38308400  | 5.42064000  |
| H | -0.09357400 | -3.08695200 | -3.21202300 | C | 5.46329100  | -0.84156000 | 5.32624600  |
| C | 1.65321400  | -2.72490300 | -4.40664200 | H | 5.04900700  | -1.28845100 | 6.23934400  |
| C | 2.64600700  | -1.79110300 | -4.72860400 | H | 6.36067700  | -0.28400500 | 5.62145800  |
| H | 3.39223000  | -2.04711500 | -5.47918700 | H | 5.77787600  | -1.66017200 | 4.67103700  |
| C | 2.69859500  | -0.53251300 | -4.11847600 | C | 3.75116500  | 0.91401700  | 0.06945000  |
| C | 1.73165200  | -0.21486000 | -3.15411400 | C | 5.07011900  | 0.45114300  | 0.22523200  |
| H | 1.75954200  | 0.75758300  | -2.67007600 | H | 5.27381200  | -0.40449500 | 0.86147300  |
| C | 1.62896600  | -4.08670300 | -5.06413700 | C | 6.13584400  | 1.07345900  | -0.42593200 |
| H | 2.00964900  | -4.04357000 | -6.09061800 | C | 5.86802700  | 2.19334900  | -1.22941300 |
| H | 0.61420800  | -4.49725300 | -5.09512100 | H | 6.69467400  | 2.69419300  | -1.73158400 |
| H | 2.25335000  | -4.80526500 | -4.51615100 | C | 4.57147900  | 2.68230200  | -1.39628000 |
| C | 3.76302800  | 0.47077900  | -4.50121700 | C | 3.51246500  | 2.02319300  | -0.74769200 |
| H | 4.49277700  | 0.03358000  | -5.19073700 | H | 2.49147600  | 2.36507900  | -0.89202300 |
| H | 4.30265000  | 0.83758000  | -3.62118300 | C | 7.54892600  | 0.55564200  | -0.27879300 |
| H | 3.32317100  | 1.34629900  | -4.99620500 | H | 7.61837200  | -0.19566900 | 0.51424700  |
| C | -1.55079300 | -2.14283500 | -1.34280000 | H | 8.24891200  | 1.36464400  | -0.03796800 |
| C | -2.76202600 | -2.37408300 | -2.01416500 | H | 7.90352400  | 0.08999200  | -1.20782800 |
| H | -3.15199300 | -1.62403000 | -2.69414400 | C | 4.30125300  | 3.91021700  | -2.23673200 |
| C | -3.47683400 | -3.56252400 | -1.83008100 | H | 4.14801200  | 4.79548800  | -1.60539000 |
| C | -2.94901000 | -4.53248200 | -0.96751700 | H | 3.39607300  | 3.78923300  | -2.84194000 |
| H | -3.48622500 | -5.47006700 | -0.83073500 | H | 5.13648800  | 4.12877000  | -2.91052200 |
| C | -1.74446200 | -4.33257400 | -0.28486900 | C | 2.60807700  | -1.65201700 | 0.90339100  |
| C | -1.05509500 | -3.12624900 | -0.47478500 | C | 3.21304900  | -2.23159800 | -0.21944900 |
| H | -0.12393800 | -2.95996300 | 0.05885300  | H | 3.57294600  | -1.60246000 | -1.02758900 |
| C | -4.79315100 | -3.79269800 | -2.53817400 | C | 3.36250700  | -3.62150300 | -0.32239700 |
| H | -5.64315000 | -3.59309300 | -1.87217300 | C | 2.89363200  | -4.42463400 | 0.72253600  |
| H | -4.88870500 | -4.82928600 | -2.88140000 | H | 3.01392500  | -5.50497600 | 0.65594000  |
| H | -4.89882700 | -3.13634000 | -3.40794900 | C | 2.27207900  | -3.87511400 | 1.85213000  |

|    |             |             |             |             |             |             |             |
|----|-------------|-------------|-------------|-------------|-------------|-------------|-------------|
| C  | 2.11972300  | -2.48656500 | 1.92217300  | H           | -1.88169700 | 3.02313100  | 0.29314300  |
| H  | 1.61592400  | -2.05158100 | 2.77931500  | H           | -1.15599800 | 3.69595400  | 1.75889100  |
| C  | 1.80571000  | -4.75612800 | 2.98937100  | H           | -0.09066600 | 5.52469900  | 0.39912000  |
| H  | 0.92509700  | -4.33458100 | 3.48533400  | H           | -3.05887400 | 5.34515300  | -1.70285200 |
| H  | 2.58784500  | -4.86378800 | 3.75308100  | H           | -5.13995200 | 6.63574700  | -1.32717900 |
| H  | 1.55178000  | -5.76310600 | 2.64136200  | H           | -5.49076000 | 7.84040200  | 0.82288800  |
| C  | 4.04471300  | -4.22951400 | -1.52694200 | H           | -3.73569500 | 7.74401500  | 2.58495100  |
| H  | 5.13803700  | -4.19431300 | -1.42582000 | H           | -1.66071000 | 6.45276800  | 2.20313000  |
| H  | 3.78488100  | -3.68908700 | -2.44321300 | O           | 0.42472000  | 2.24875200  | -0.76454300 |
| H  | 3.76414600  | -5.28036900 | -1.65670900 | H           | -0.78997400 | 4.84046800  | -1.06758500 |
| Ru | 0.12112100  | 0.67332100  | 0.65813500  | H           | 1.14848500  | 3.20995000  | 0.89411400  |
| P  | -0.55505400 | -0.59799500 | -1.58202900 |             |             |             |             |
| P  | 2.34790800  | 0.17423300  | 1.03996100  |             |             |             |             |
| H  | -1.34077400 | -5.10152100 | 1.70011800  | <b>TS6'</b> |             |             |             |
| H  | 0.22408500  | 1.33845900  | 2.10343300  | C           | 1.00798600  | -0.67641700 | 2.87137300  |
| C  | -1.87639900 | -0.52629700 | 1.76086900  | C           | 2.15015700  | 0.13190600  | 2.75815500  |
| C  | -2.94564800 | -1.32190500 | 2.47943800  | H           | 2.49463800  | 0.43551800  | 1.77534800  |
| C  | -4.33034100 | -1.22847200 | 1.80957700  | C           | 2.86009200  | 0.53500400  | 3.89303300  |
| C  | -5.38250200 | -2.02774500 | 2.54835700  | C           | 2.40680100  | 0.12480900  | 5.15357100  |
| C  | -5.57726100 | -3.38813300 | 2.26887800  | H           | 2.95554800  | 0.43299700  | 6.04262600  |
| C  | -6.52515900 | -4.13628200 | 2.96898300  | C           | 1.27025700  | -0.67479600 | 5.29783200  |
| C  | -7.29798700 | -3.53444600 | 3.96448400  | C           | 0.58256900  | -1.07744600 | 4.14401100  |
| C  | -7.11569300 | -2.18029600 | 4.25192600  | H           | -0.28811000 | -1.71599000 | 4.25151400  |
| C  | -6.16647700 | -1.43645600 | 3.54857300  | C           | 4.08398600  | 1.41389000  | 3.76659000  |
| H  | -2.60990100 | -2.36157400 | 2.54796600  | H           | 3.84985300  | 2.45797600  | 4.01519400  |
| H  | -3.00417400 | -0.94597900 | 3.51078600  | H           | 4.48079700  | 1.39819000  | 2.74647900  |
| H  | -4.62147300 | -0.17442200 | 1.75478500  | H           | 4.88244100  | 1.09387900  | 4.44650700  |
| H  | -4.98019800 | -3.86040100 | 1.49104300  | C           | 0.77847500  | -1.08662700 | 6.66753000  |
| H  | -6.66375300 | -5.18881100 | 2.73403600  | H           | 0.30463700  | -2.07420600 | 6.64457300  |
| H  | -8.03889100 | -4.11465800 | 4.50829200  | H           | 0.03174900  | -0.37864800 | 7.05204500  |
| H  | -7.71625200 | -1.70066800 | 5.02083500  | H           | 1.59751200  | -1.12046800 | 7.39423600  |
| H  | -6.03431500 | -0.38000700 | 3.77355200  | C           | -1.37241200 | -2.02342400 | 1.95892100  |
| O  | -0.65519300 | -0.90865400 | 1.84430000  | C           | -1.61406800 | -3.39929700 | 1.88930200  |
| O  | -2.15292100 | 0.51178500  | 1.09449600  | H           | -0.88301600 | -4.05491900 | 1.42680600  |
| H  | -4.24512900 | -1.58614800 | 0.77685100  | C           | -2.78976400 | -3.95373700 | 2.41379400  |
| C  | 0.24988200  | 2.81261900  | 0.39308100  | C           | -3.71294400 | -3.10525500 | 3.03296700  |
| C  | -1.02416500 | 3.58238500  | 0.67624600  | H           | -4.61949800 | -3.52898000 | 3.46273300  |
| C  | -0.96050300 | 4.97989600  | 0.00627900  | C           | -3.49975100 | -1.72263300 | 3.11732000  |
| C  | -2.21528500 | 5.79687500  | 0.22591300  | C           | -2.32932100 | -1.19393800 | 2.56388700  |
| C  | -3.21050500 | 5.86469400  | -0.75910000 | H           | -2.15432600 | -0.12318400 | 2.62045600  |
| C  | -4.38330300 | 6.59329900  | -0.54769000 | C           | -3.05392500 | -5.43720000 | 2.29219600  |
| C  | -4.58030800 | 7.27054800  | 0.65701500  | H           | -3.80595300 | -5.77267100 | 3.01423400  |
| C  | -3.59508600 | 7.21497500  | 1.64561700  | H           | -2.14176300 | -6.02200800 | 2.45600100  |
| C  | -2.42520900 | 6.48577800  | 1.42924600  | H           | -3.42321100 | -5.68963500 | 1.28922300  |
|    |             |             |             | C           | -4.49747900 | -0.82106400 | 3.80915900  |

|   |             |             |             |    |             |             |             |
|---|-------------|-------------|-------------|----|-------------|-------------|-------------|
| H | -5.47438200 | -1.30613000 | 3.90823200  | H  | -2.13893600 | 2.04179500  | 1.56909600  |
| H | -4.63663200 | 0.11528600  | 3.25749200  | C  | -7.04802500 | 2.75769900  | -0.58480000 |
| H | -4.15990000 | -0.55589600 | 4.82014000  | H  | -7.11703400 | 2.32016600  | -1.58566400 |
| C | 1.22088500  | -2.69825200 | 0.83149000  | H  | -7.28022600 | 3.82655400  | -0.67048000 |
| C | 2.14377800  | -3.27155400 | 1.71913100  | H  | -7.83624400 | 2.30731500  | 0.03214400  |
| H | 2.25716300  | -2.86349700 | 2.71792600  | C  | -3.77860100 | 3.48319700  | 3.21283800  |
| C | 2.93269700  | -4.36395200 | 1.34046400  | H  | -2.78736700 | 3.94990400  | 3.21382000  |
| C | 2.77778400  | -4.88536400 | 0.05064400  | H  | -3.76634200 | 2.70920800  | 3.99151600  |
| H | 3.38468000  | -5.73700800 | -0.25407400 | H  | -4.51302600 | 4.23871000  | 3.51110100  |
| C | 1.86222300  | -4.34080400 | -0.85720700 | C  | -2.82219900 | -1.03185500 | -1.22394300 |
| C | 1.09034300  | -3.24195100 | -0.45507200 | C  | -4.01274100 | -1.44861200 | -0.62554500 |
| H | 0.39480600  | -2.79333700 | -1.15532500 | H  | -4.54972500 | -0.78044200 | 0.03933300  |
| C | 3.94982800  | -4.94811000 | 2.29499300  | C  | -4.54247500 | -2.72465000 | -0.87892000 |
| H | 4.93687700  | -4.48764200 | 2.15436400  | C  | -3.85870400 | -3.57019200 | -1.75288600 |
| H | 4.07042400  | -6.02646900 | 2.14295800  | H  | -4.27313200 | -4.55278200 | -1.97458900 |
| H | 3.66052900  | -4.78214500 | 3.33796200  | C  | -2.65554300 | -3.18267000 | -2.36333000 |
| C | 1.70128500  | -4.93747000 | -2.23760000 | C  | -2.14116100 | -1.91515500 | -2.08298500 |
| H | 0.92571500  | -5.71517000 | -2.24938100 | H  | -1.21523300 | -1.59589700 | -2.55479300 |
| H | 2.63072700  | -5.40254800 | -2.58356900 | C  | -1.94588800 | -4.12227100 | -3.31138900 |
| C | -2.30571500 | 1.35266000  | -2.72493700 | H  | -1.13529600 | -3.61537800 | -3.84401600 |
| C | -1.64553700 | 2.53390800  | -3.08414400 | H  | -2.63604300 | -4.53107300 | -4.05944200 |
| H | -0.97344900 | 3.01061400  | -2.37908600 | H  | -1.50976000 | -4.97593800 | -2.77677800 |
| C | -1.82091800 | 3.11927900  | -4.34404700 | C  | -5.83013800 | -3.15867400 | -0.21720800 |
| C | -2.68131200 | 2.50022200  | -5.25539300 | H  | -6.60875800 | -2.39239300 | -0.31274400 |
| H | -2.82710000 | 2.94704600  | -6.23761600 | H  | -5.67828300 | -3.33253600 | 0.85529200  |
| C | -3.35795300 | 1.31879200  | -4.93295500 | H  | -6.21402800 | -4.08545000 | -0.65632200 |
| C | -3.16535500 | 0.75985600  | -3.66405200 | Ru | 0.09476200  | 0.68657100  | -0.25712100 |
| H | -3.69397900 | -0.15366400 | -3.41396300 | P  | 0.17475700  | -1.23801400 | 1.30885600  |
| C | -1.07110500 | 4.37948000  | -4.71303700 | P  | -2.10418200 | 0.65937200  | -0.99543900 |
| H | -1.02727600 | 5.08127100  | -3.87249300 | H  | 1.40939100  | -4.17793900 | -2.97008700 |
| H | -1.54134200 | 4.89322800  | -5.55815400 | H  | 0.29058700  | 2.10689000  | -1.11838600 |
| H | -0.03539100 | 4.15454800  | -5.00034500 | C  | 2.16188600  | -0.22222300 | -1.49823400 |
| C | -4.25994300 | 0.64570200  | -5.94313900 | C  | 3.32302400  | -0.76215800 | -2.30773300 |
| H | -3.68168400 | 0.02520400  | -6.64096900 | C  | 4.57997200  | -1.03839600 | -1.45918400 |
| H | -4.80882700 | 1.38005900  | -6.54357500 | C  | 5.72592400  | -1.58355300 | -2.28446400 |
| H | -4.99058900 | -0.00824600 | -5.45566600 | C  | 5.91140500  | -2.96539300 | -2.43064200 |
| C | -3.42666100 | 1.60592900  | -0.09751300 | C  | 6.94902800  | -3.47257000 | -3.21489300 |
| C | -4.69903500 | 1.81392200  | -0.66091900 | C  | 7.82292500  | -2.60195300 | -3.86914600 |
| H | -4.92667700 | 1.41633600  | -1.64576900 | C  | 7.65142900  | -1.22285500 | -3.73076900 |
| C | -5.67924900 | 2.53773000  | 0.01937400  | C  | 6.61273800  | -0.72134000 | -2.94490700 |
| C | -5.36495300 | 3.07027000  | 1.28017400  | H  | 2.98856500  | -1.66745500 | -2.82447400 |
| H | -6.11951600 | 3.64687000  | 1.81366500  | H  | 3.55704400  | -0.02721000 | -3.09114100 |
| C | -4.10666800 | 2.89593500  | 1.85801600  | H  | 4.87550300  | -0.10824700 | -0.96285000 |
| C | -3.13876400 | 2.15550700  | 1.15618300  | H  | 5.23687600  | -3.64701900 | -1.91616100 |

|              |             |             |             |   |             |             |             |
|--------------|-------------|-------------|-------------|---|-------------|-------------|-------------|
| H            | 7.07819000  | -4.54787600 | -3.31106900 | H | -3.01696300 | 5.65239800  | 1.53249000  |
| H            | 8.63359500  | -2.99433800 | -4.47755100 | H | -1.74311600 | 6.64651700  | 2.24796100  |
| H            | 8.33044200  | -0.53656800 | -4.23069200 | C | -0.85993500 | 0.50052200  | 2.30969600  |
| H            | 6.48989700  | 0.35448500  | -2.83601200 | C | -0.48748400 | 0.36591100  | 3.65251700  |
| O            | 0.96500400  | -0.45904000 | -1.87710600 | H | 0.55432700  | 0.46742400  | 3.93893900  |
| O            | 2.35881500  | 0.47450700  | -0.45426100 | C | -1.44562400 | 0.11043400  | 4.64303700  |
| H            | 4.31992200  | -1.74873900 | -0.66601100 | C | -2.78684700 | -0.00153100 | 4.26206600  |
| C            | 0.13070700  | 2.88580100  | 0.27030700  | H | -3.54024100 | -0.18901700 | 5.02521200  |
| C            | 1.42733000  | 3.67900800  | 0.16189700  | C | -3.19118700 | 0.13404100  | 2.92680300  |
| C            | 1.50719600  | 4.73718300  | 1.28704200  | C | -2.21279000 | 0.38164700  | 1.95596300  |
| C            | 2.74685200  | 5.59994500  | 1.18591700  | H | -2.50387500 | 0.49049800  | 0.91484500  |
| C            | 3.98513500  | 5.13218700  | 1.64990100  | C | -1.02943000 | -0.02436900 | 6.09108000  |
| C            | 5.13693200  | 5.91091000  | 1.53323200  | H | -1.89749200 | -0.14824200 | 6.74661400  |
| C            | 5.07135700  | 7.17768300  | 0.94805200  | H | -0.47609500 | 0.85942900  | 6.43116200  |
| C            | 3.84568600  | 7.65653300  | 0.48254000  | H | -0.37242700 | -0.89030500 | 6.24020700  |
| C            | 2.69621100  | 6.87264900  | 0.60152900  | C | -4.64821300 | 0.01039000  | 2.54340900  |
| H            | 2.27492700  | 2.99079600  | 0.22802000  | H | -5.29424000 | 0.02377100  | 3.42747100  |
| H            | 1.47493200  | 4.17319600  | -0.81723600 | H | -4.83816200 | -0.92251800 | 1.99990600  |
| H            | 0.61312100  | 5.37415600  | 1.25026500  | H | -4.96000200 | 0.83114900  | 1.88664600  |
| H            | 4.04373500  | 4.14776100  | 2.10902800  | C | 1.98848200  | 0.90136000  | 1.88355000  |
| H            | 6.08566700  | 5.53014900  | 1.90320700  | C | 2.59609300  | 2.07971600  | 2.34626800  |
| H            | 5.96699400  | 7.78692500  | 0.85913600  | H | 2.11703000  | 3.03829900  | 2.17798600  |
| H            | 3.78209800  | 8.64286700  | 0.02963900  | C | 3.81479000  | 2.04354600  | 3.03310400  |
| H            | 1.74362800  | 7.25552600  | 0.24064200  | C | 4.41552700  | 0.79913900  | 3.26134400  |
| O            | -0.04773900 | 2.12286100  | 1.31833800  | H | 5.35831300  | 0.75665400  | 3.80496400  |
| H            | 1.48344200  | 4.21263900  | 2.24923700  | C | 3.83331800  | -0.39181900 | 2.81513900  |
| H            | -0.76085200 | 3.43280500  | -0.08365100 | C | 2.61749800  | -0.32799200 | 2.12074100  |
| <b>Int9'</b> |             |             |             | H | 2.16583400  | -1.24504100 | 1.75826200  |
| C            | 0.07533500  | 2.73858700  | 0.72714200  | C | 4.47521800  | 3.31900400  | 3.50682300  |
| C            | 0.81659500  | 3.39922900  | -0.26521500 | H | 5.26214400  | 3.64232700  | 2.81239100  |
| H            | 1.51589900  | 2.83733800  | -0.87630100 | H | 4.94556800  | 3.18698100  | 4.48796300  |
| C            | 0.65675800  | 4.77204300  | -0.48754400 | H | 3.75304400  | 4.13812600  | 3.58489100  |
| C            | -0.27175300 | 5.47525500  | 0.28834300  | C | 4.50711600  | -1.72327000 | 3.05786200  |
| H            | -0.41313700 | 6.54044300  | 0.11203100  | H | 3.78804200  | -2.47523900 | 3.40034200  |
| C            | -1.02986400 | 4.84258000  | 1.27930100  | H | 5.30061400  | -1.63974300 | 3.80804500  |
| C            | -0.83865200 | 3.47191300  | 1.49740100  | C | -0.57400200 | -3.16954000 | -1.99814900 |
| H            | -1.41741500 | 2.98087200  | 2.27255000  | C | -0.67366100 | -2.50818600 | -3.22939100 |
| C            | 1.48462400  | 5.47896700  | -1.53722300 | H | -0.90347000 | -1.44411800 | -3.24917300 |
| H            | 0.96344900  | 6.35687900  | -1.93398200 | C | -0.52801900 | -3.20652800 | -4.43798700 |
| H            | 1.71725500  | 4.81250600  | -2.37426200 | C | -0.29105900 | -4.58172600 | -4.39034800 |
| H            | 2.44063800  | 5.82665800  | -1.12270900 | H | -0.17959300 | -5.13397100 | -5.32227400 |
| C            | -2.06126900 | 5.61289700  | 2.07189900  | C | -0.20539200 | -5.27333600 | -3.17303100 |
| H            | -2.25116100 | 5.14563700  | 3.04420300  | C | -0.35250400 | -4.55582900 | -1.98327400 |
|              |             |             |             | H | -0.29685500 | -5.08822700 | -1.03857000 |

|    |             |             |             |   |             |             |             |
|----|-------------|-------------|-------------|---|-------------|-------------|-------------|
| C  | -0.62268500 | -2.47248000 | -5.75626600 | P | -0.84151500 | -2.15253700 | -0.46315500 |
| H  | -1.51971500 | -1.84358900 | -5.79854800 | H | 4.96096600  | -2.11082200 | 2.13650800  |
| H  | -0.65665600 | -3.16813700 | -6.60104100 | H | -0.24605800 | 2.06867400  | -2.70696300 |
| H  | 0.23997100  | -1.81025500 | -5.90469100 | C | 2.77804800  | 0.04403300  | -1.49868000 |
| C  | 0.04931700  | -6.76387400 | -3.15463000 | C | 4.26154500  | 0.10770600  | -1.79746600 |
| H  | 1.07927000  | -6.99678700 | -3.45569900 | C | 4.86611200  | 1.49356600  | -1.47828000 |
| H  | -0.61513800 | -7.29278800 | -3.84827200 | C | 6.36148200  | 1.53602300  | -1.70721600 |
| H  | -0.10511200 | -7.18322900 | -2.15525600 | C | 7.25230900  | 1.21383800  | -0.67364900 |
| C  | -2.66181100 | -2.43893800 | -0.24181300 | C | 8.63174900  | 1.21907600  | -0.88644300 |
| C  | -3.18121900 | -3.60339300 | 0.34827500  | C | 9.14569600  | 1.54839900  | -2.14247200 |
| H  | -2.51263700 | -4.33308500 | 0.79428200  | C | 8.26994600  | 1.87294800  | -3.18066800 |
| C  | -4.55608700 | -3.84878200 | 0.36320800  | C | 6.89127900  | 1.86650600  | -2.96229500 |
| C  | -5.40939700 | -2.91331400 | -0.24144300 | H | 4.76293500  | -0.67636400 | -1.22270700 |
| H  | -6.48226900 | -3.10111900 | -0.24554700 | H | 4.41269700  | -0.11862100 | -2.86161900 |
| C  | -4.91935500 | -1.75552200 | -0.85057900 | H | 4.36132800  | 2.24295200  | -2.09689000 |
| C  | -3.53359200 | -1.52234800 | -0.84125600 | H | 6.85634300  | 0.96180000  | 0.30830400  |
| H  | -3.11616400 | -0.63947000 | -1.32267300 | H | 9.30557600  | 0.97022400  | -0.07030300 |
| C  | -5.11831000 | -5.10076400 | 0.99862600  | H | 10.21956200 | 1.55613800  | -2.30978400 |
| H  | -4.32572000 | -5.71944400 | 1.43144400  | H | 8.66039200  | 2.13625800  | -4.16052300 |
| H  | -5.65705000 | -5.71391500 | 0.26514600  | H | 6.21499300  | 2.12612800  | -3.77432700 |
| H  | -5.82954900 | -4.86054700 | 1.79901400  | O | 2.30418500  | -0.93230100 | -0.83476300 |
| C  | -5.85919700 | -0.76801500 | -1.50526400 | O | 1.99483600  | 0.96798000  | -1.89748100 |
| H  | -5.52792300 | -0.51571300 | -2.51890000 | H | 4.64448500  | 1.74243000  | -0.43319700 |
| H  | -5.91014500 | 0.17406200  | -0.94444800 | C | -1.28357500 | 1.69553900  | -2.71466500 |
| H  | -6.87616800 | -1.16854700 | -1.57158100 | C | -2.21361000 | 2.83029400  | -2.25927000 |
| C  | -0.02577300 | -3.09986900 | 0.89315200  | C | -3.70809200 | 2.47464600  | -2.36495000 |
| C  | -0.57500000 | -3.14278800 | 2.18444400  | C | -4.62111800 | 3.56361400  | -1.84483800 |
| H  | -1.52720700 | -2.66152200 | 2.38488500  | C | -4.84264500 | 3.71393300  | -0.46662600 |
| C  | 0.08593100  | -3.79796400 | 3.22982400  | C | -5.66231200 | 4.73056400  | 0.02630900  |
| C  | 1.31891100  | -4.40780000 | 2.96665300  | C | -6.27864300 | 5.62400200  | -0.85394200 |
| H  | 1.83750100  | -4.92583500 | 3.77212000  | C | -6.06784400 | 5.48790200  | -2.22685900 |
| C  | 1.90340900  | -4.36342600 | 1.69592700  | C | -5.24820500 | 4.46701900  | -2.71361900 |
| C  | 1.22704700  | -3.69120600 | 0.67009700  | H | -1.97520300 | 3.09175200  | -1.22270800 |
| H  | 1.68916000  | -3.62287600 | -0.30918800 | H | -2.00690600 | 3.72368000  | -2.86698700 |
| C  | 3.22507700  | -5.04440500 | 1.42013800  | H | -3.95476200 | 2.25413100  | -3.41283300 |
| H  | 3.84559600  | -4.45044300 | 0.74039100  | H | -4.36131600 | 3.02570600  | 0.22572700  |
| H  | 3.07485900  | -6.02437600 | 0.94768400  | H | -5.82690700 | 4.82067900  | 1.09754500  |
| H  | 3.79217200  | -5.21011500 | 2.34213500  | H | -6.91982700 | 6.41466000  | -0.47297600 |
| C  | -0.53417800 | -3.86998500 | 4.60687900  | H | -6.54508400 | 6.17453400  | -2.92189700 |
| H  | -1.10666900 | -4.79830300 | 4.73834000  | H | -5.09370600 | 4.36589500  | -3.78599200 |
| H  | -1.22099300 | -3.03483300 | 4.77658900  | O | -1.41738600 | 0.52864200  | -1.94139600 |
| H  | 0.23031800  | -3.84999300 | 5.39181400  | H | -3.87746200 | 1.55109100  | -1.80108400 |
| Ru | 0.24248600  | -0.17059000 | -0.99238800 | H | -1.51832300 | 1.45209500  | -3.76915100 |
| P  | 0.36104000  | 0.92353700  | 0.98717300  |   |             |             |             |

**Int11**

|   |             |             |             |   |             |             |             |
|---|-------------|-------------|-------------|---|-------------|-------------|-------------|
| C | -1.88989500 | 2.37574100  | -1.13887900 | C | 0.70205100  | 6.85050300  | -0.23746800 |
| C | -1.18898300 | 2.38479300  | -2.35319100 | H | -0.24488500 | 6.94519700  | -0.77885100 |
| H | -0.15677200 | 2.04941400  | -2.37551400 | H | 1.51028700  | 6.93131700  | -0.97646100 |
| C | -1.79385400 | 2.83113400  | -3.53660100 | H | 0.79468400  | 7.70914300  | 0.43722800  |
| C | -3.11967900 | 3.27397000  | -3.48504800 | C | 2.69635400  | 4.04408000  | 3.47413000  |
| H | -3.59606100 | 3.63089000  | -4.39721300 | H | 2.28180200  | 3.38790200  | 4.24631700  |
| C | -3.84653900 | 3.27889400  | -2.28674200 | H | 2.91934200  | 5.01485100  | 3.93001100  |
| C | -3.21723500 | 2.83169800  | -1.11856200 | C | 0.78071500  | -3.18649000 | 1.68682600  |
| H | -3.77185300 | 2.84652100  | -0.18658000 | C | 0.57801900  | -4.06553000 | 0.61005600  |
| C | -1.02251500 | 2.80638100  | -4.83616700 | H | -0.06245600 | -3.76570300 | -0.21351700 |
| H | -0.79695500 | 1.77419900  | -5.13168100 | C | 1.17279900  | -5.32628800 | 0.58097700  |
| H | -0.06399200 | 3.33047200  | -4.74229900 | C | 1.99779000  | -5.70316200 | 1.65257100  |
| H | -1.58654400 | 3.27623900  | -5.64853200 | H | 2.46814600  | -6.68528900 | 1.64113100  |
| C | -5.28732400 | 3.73838900  | -2.26075400 | C | 2.22016300  | -4.85350300 | 2.73508600  |
| H | -5.60184000 | 4.01166800  | -1.24831200 | C | 1.59400800  | -3.59529700 | 2.74536100  |
| H | -5.96277800 | 2.94617000  | -2.61103500 | H | 1.74690000  | -2.94788700 | 3.60218500  |
| H | -5.44338200 | 4.60720600  | -2.91042900 | C | 0.95080100  | -6.26801100 | -0.58127200 |
| C | -2.33033100 | 1.88772300  | 1.67171700  | H | 0.69722500  | -7.27757900 | -0.23588300 |
| C | -2.36506200 | 2.91224400  | 2.62869700  | H | 1.85174700  | -6.35629000 | -1.20226000 |
| H | -1.57900400 | 3.65859700  | 2.65444200  | H | 0.13957900  | -5.91936000 | -1.22847900 |
| C | -3.40886000 | 3.00241600  | 3.55717000  | C | 3.11902500  | -5.26422900 | 3.88006300  |
| C | -4.43591500 | 2.05274400  | 3.50573100  | H | 4.08161900  | -4.73712300 | 3.84157200  |
| H | -5.26135900 | 2.12346000  | 4.21223200  | H | 3.33180900  | -6.33808400 | 3.85604200  |
| C | -4.43673200 | 1.02229300  | 2.55877700  | H | 2.66525600  | -5.03220100 | 4.85098400  |
| C | -3.37037500 | 0.94740300  | 1.65190900  | C | -1.84314400 | -2.38040100 | 2.04386100  |
| H | -3.36339400 | 0.15353300  | 0.91143000  | C | -2.06923400 | -3.01908600 | 3.27674000  |
| C | -3.41980400 | 4.10101800  | 4.59655000  | H | -1.31710100 | -2.96664700 | 4.05830900  |
| H | -4.44207500 | 4.38018700  | 4.87445700  | C | -3.24007200 | -3.73959200 | 3.51368400  |
| H | -2.90904700 | 4.99906300  | 4.23328400  | C | -4.18773900 | -3.83633900 | 2.48148500  |
| H | -2.90728500 | 3.78546300  | 5.51517800  | H | -5.09897300 | -4.40827500 | 2.65073000  |
| C | -5.56652100 | 0.01903800  | 2.50598900  | C | -3.98382500 | -3.23080700 | 1.24117400  |
| H | -6.33531500 | 0.24742800  | 3.25132300  | C | -2.80295600 | -2.49534000 | 1.03575900  |
| H | -5.20595100 | -0.99911900 | 2.69101000  | H | -2.62168300 | -2.02149100 | 0.07637900  |
| H | -6.04928300 | 0.01453700  | 1.52062900  | C | -3.48493700 | -4.41695100 | 4.84318300  |
| C | 0.07091300  | 3.22451800  | 0.81514200  | H | -3.63940700 | -5.49605800 | 4.71927300  |
| C | -0.00903700 | 4.44884800  | 0.13596100  | H | -4.38090200 | -4.01910100 | 5.33659800  |
| H | -0.69634700 | 4.56366500  | -0.69543200 | H | -2.63953000 | -4.27695600 | 5.52391800  |
| C | 0.77817300  | 5.54227700  | 0.51757100  | C | -5.00179200 | -3.36649200 | 0.13085600  |
| C | 1.64192000  | 5.39573000  | 1.60979300  | H | -5.88746100 | -3.91675100 | 0.46460500  |
| H | 2.24272900  | 6.24610600  | 1.92973700  | H | -4.58346200 | -3.90357800 | -0.73009000 |
| C | 1.74413500  | 4.18695200  | 2.30830600  | H | -5.33536500 | -2.38683300 | -0.23302900 |
| C | 0.95666800  | 3.10401600  | 1.89579300  | C | 0.28405100  | -0.73319800 | 3.22679600  |
| H | 1.03438100  | 2.16114900  | 2.42687500  | C | -0.66486000 | -0.25218300 | 4.14099200  |
|   |             |             |             | H | -1.72283600 | -0.41486900 | 3.96263600  |

|    |             |             |             |            |             |             |             |
|----|-------------|-------------|-------------|------------|-------------|-------------|-------------|
| C  | -0.27320300 | 0.44682400  | 5.28941000  | C          | 6.96165400  | -4.09294100 | -4.12330800 |
| C  | 1.09193800  | 0.66434200  | 5.51020000  | C          | 7.43742400  | -4.96103600 | -3.13890600 |
| H  | 1.40666200  | 1.20064200  | 6.40424600  | C          | 6.83443500  | -4.96599000 | -1.87876100 |
| C  | 2.06223000  | 0.21565900  | 4.60624800  | C          | 5.76603900  | -4.10987000 | -1.60889900 |
| C  | 1.64327700  | -0.46762200 | 3.45814100  | H          | 1.74491400  | -0.26799900 | -2.65748900 |
| H  | 2.38393400  | -0.78135100 | 2.73046400  | H          | 2.71144100  | -3.93653300 | -1.85442300 |
| C  | 3.53525600  | 0.44087600  | 4.86392900  | H          | 2.63669500  | -3.37551300 | -3.53017000 |
| H  | 4.06471500  | 0.70397900  | 3.94169800  | H          | 4.13160200  | -1.45423200 | -2.95535000 |
| H  | 4.01165200  | -0.46492500 | 5.26206200  | H          | 5.52856600  | -2.56316400 | -4.61929400 |
| H  | 3.69853200  | 1.24255100  | 5.59183000  | H          | 7.42563400  | -4.07726600 | -5.10662800 |
| C  | -1.30511400 | 0.92821900  | 6.28440900  | H          | 8.27212900  | -5.62462500 | -3.34986800 |
| H  | -1.49728100 | 0.17159900  | 7.05746300  | H          | 7.20030300  | -5.63435800 | -1.10289100 |
| H  | -2.25952300 | 1.14381700  | 5.79333800  | H          | 5.30286400  | -4.11670200 | -0.62414100 |
| H  | -0.97136300 | 1.83650500  | 6.79850900  | O          | 1.62323100  | -1.68226300 | -0.87681100 |
| Ru | 0.27082300  | -0.23768500 | -0.16070100 | O          | 1.43421900  | -1.06808800 | -3.14053200 |
| P  | -0.99744000 | 1.76787000  | 0.37984100  | H          | 4.14131100  | -1.96750200 | -1.26536500 |
| P  | -0.19603300 | -1.59911500 | 1.66557700  | C          | -1.80268000 | -0.84022800 | -2.57557700 |
| H  | 3.65138200  | 3.60483800  | 3.15620400  | C          | -3.28187100 | -0.85269300 | -2.91776200 |
| H  | 0.60906100  | -2.75369900 | -2.32332700 | C          | -3.62654600 | -1.01847900 | -4.40815300 |
| C  | 2.42635600  | 1.13106200  | -0.47402200 | C          | -5.12243600 | -0.97489100 | -4.64354400 |
| C  | 3.77827200  | 1.79992900  | -0.57135300 | C          | -5.88364500 | -2.15067200 | -4.68075300 |
| C  | 3.76790100  | 3.06066700  | -1.46076100 | C          | -7.26755400 | -2.10570900 | -4.86249600 |
| C  | 5.12155800  | 3.73601900  | -1.51553700 | C          | -7.91511500 | -0.87798300 | -5.01075800 |
| C  | 5.44774100  | 4.76003700  | -0.61555400 | C          | -7.16841500 | 0.30213800  | -4.97855100 |
| C  | 6.70562900  | 5.36503500  | -0.64121500 | C          | -5.78557300 | 0.25152100  | -4.79663000 |
| C  | 7.66204300  | 4.95338500  | -1.57155000 | H          | 0.04560500  | -0.84182300 | -3.34731200 |
| C  | 7.34996700  | 3.93515000  | -2.47501300 | H          | -3.75247200 | -1.64288800 | -2.32075700 |
| C  | 6.09056100  | 3.33435400  | -2.44573800 | H          | -3.69323300 | 0.09157400  | -2.53736900 |
| H  | 4.11781100  | 2.03528600  | 0.44207700  | H          | -3.13171300 | -0.22415100 | -4.97595700 |
| H  | 4.48574300  | 1.06373800  | -0.97796400 | H          | -5.38529100 | -3.11205800 | -4.57313500 |
| H  | 3.44207900  | 2.77513100  | -2.46652400 | H          | -7.83831900 | -3.03035900 | -4.89370600 |
| H  | 4.70280300  | 5.08691100  | 0.10734400  | H          | -8.99142300 | -0.84087300 | -5.15648500 |
| H  | 6.93733400  | 6.16072000  | 0.06254400  | H          | -7.66246800 | 1.26263300  | -5.10248400 |
| H  | 8.64110400  | 5.42465800  | -1.59527300 | H          | -5.20746700 | 1.17317800  | -4.77724900 |
| H  | 8.08599500  | 3.61113700  | -3.20643900 | O          | -1.47293400 | -0.88713100 | -1.37443800 |
| H  | 5.85283300  | 2.54552600  | -3.15665200 | O          | -0.99329300 | -0.76642600 | -3.58836500 |
| O  | 2.06821600  | 0.57878700  | 0.61253300  | H          | -3.21388000 | -1.96563400 | -4.77370000 |
| O  | 1.62635000  | 1.11107400  | -1.47176100 |            |             |             |             |
| H  | 3.01782100  | 3.75950100  | -1.07286800 | <b>TS7</b> |             |             |             |
| C  | 1.53312800  | -2.17493200 | -2.11728400 | C          | 1.87319300  | -2.35626000 | -1.23541200 |
| C  | 2.74457800  | -3.04289500 | -2.48995200 | C          | 1.17669400  | -2.29405800 | -2.45029800 |
| C  | 4.09587500  | -2.33154400 | -2.29742100 | H          | 0.15165400  | -1.93815900 | -2.46083000 |
| C  | 5.27589500  | -3.23275500 | -2.58825100 | C          | 1.77743700  | -2.69292200 | -3.65225400 |
| C  | 5.89191300  | -3.23892800 | -3.84749700 | C          | 3.09449800  | -3.16209300 | -3.61847000 |



|   |             |             |             |   |             |             |             |
|---|-------------|-------------|-------------|---|-------------|-------------|-------------|
| H | 3.56846500  | -3.48119500 | -4.54574500 | H | -2.96962800 | -5.16502200 | 3.70986000  |
| C | 3.81647500  | -3.23917400 | -2.41975300 | C | -0.69971200 | 3.10299700  | 1.82481700  |
| C | 3.19155400  | -2.83772100 | -1.23297400 | C | -0.45777400 | 4.02688800  | 0.79374200  |
| H | 3.74293400  | -2.90621700 | -0.30154300 | H | 0.20226500  | 3.75595600  | -0.02498400 |
| C | 1.01133700  | -2.58623500 | -4.95060200 | C | -1.03522600 | 5.29551500  | 0.80570800  |
| H | 0.79202700  | -1.53637400 | -5.18073200 | C | -1.88239900 | 5.63636200  | 1.87276500  |
| H | 0.05021100  | -3.11118800 | -4.89234300 | H | -2.34029000 | 6.62420100  | 1.89307400  |
| H | 1.57623700  | -3.00840700 | -5.78819100 | C | -2.14115900 | 4.74359400  | 2.91120100  |
| C | 5.24936600  | -3.72321600 | -2.41247600 | C | -1.53279000 | 3.47648200  | 2.88013900  |
| H | 5.55080600  | -4.06711500 | -1.41765000 | H | -1.71572700 | 2.79352700  | 3.70276700  |
| H | 5.94037900  | -2.92083100 | -2.70447200 | C | -0.76394900 | 6.28917200  | -0.30170400 |
| H | 5.39782700  | -4.54998700 | -3.11646700 | H | -0.39255300 | 7.24119400  | 0.09750400  |
| C | 2.31302400  | -1.99919400 | 1.59586500  | H | -1.67484200 | 6.51327100  | -0.87151800 |
| C | 2.32785600  | -3.06223600 | 2.51016800  | H | -0.01825700 | 5.90798000  | -1.00668900 |
| H | 1.52778800  | -3.79383800 | 2.50644000  | C | -3.05886200 | 5.11675100  | 4.05406800  |
| C | 3.37080400  | -3.21136300 | 3.43188900  | H | -4.00984700 | 4.57076600  | 3.99806400  |
| C | 4.41668700  | -2.28129800 | 3.41668400  | H | -3.29245100 | 6.18642800  | 4.04638700  |
| H | 5.24202000  | -2.39754800 | 4.11729000  | H | -2.60904300 | 4.87747100  | 5.02521900  |
| C | 4.43753800  | -1.21365700 | 2.51198100  | C | 1.90721200  | 2.23327600  | 2.14419400  |
| C | 3.37158400  | -1.07986100 | 1.61143900  | C | 2.15264800  | 2.82146300  | 3.39842000  |
| H | 3.37936500  | -0.25874800 | 0.90158100  | H | 1.40577100  | 2.75308500  | 4.18391900  |
| C | 3.36087700  | -4.35166700 | 4.42535900  | C | 3.33741000  | 3.51312900  | 3.65173100  |
| H | 4.37761700  | -4.65549800 | 4.69745200  | C | 4.27807800  | 3.63274600  | 2.61550400  |
| H | 2.84096700  | -5.22730100 | 4.02249400  | H | 5.20009800  | 4.18294200  | 2.79813100  |
| H | 2.84647900  | -4.06750300 | 5.35314100  | C | 4.05438200  | 3.07784800  | 1.35498500  |
| C | 5.58943400  | -0.23464000 | 2.49569000  | C | 2.86001100  | 2.36956100  | 1.13181800  |
| H | 6.34868700  | -0.50348600 | 3.23728900  | H | 2.65999400  | 1.93502600  | 0.15704400  |
| H | 5.25058900  | 0.78510500  | 2.71007400  | C | 3.60449200  | 4.13604000  | 5.00340600  |
| H | 6.07756400  | -0.21085500 | 1.51326700  | H | 3.78257100  | 5.21521600  | 4.91782200  |
| C | -0.10403800 | -3.26667700 | 0.67534900  | H | 4.49389500  | 3.70079600  | 5.47681500  |
| C | -0.05397600 | -4.45331700 | -0.06984800 | H | 2.75980700  | 3.99021000  | 5.68388700  |
| H | 0.62477300  | -4.53583400 | -0.91203600 | C | 5.06529300  | 3.23911800  | 0.24168300  |
| C | -0.86185500 | -5.54966200 | 0.25752100  | H | 5.96573100  | 3.75547900  | 0.58985600  |
| C | -1.71512900 | -5.44533000 | 1.36258400  | H | 4.65095000  | 3.82103100  | -0.59152900 |
| H | -2.33164600 | -6.29928300 | 1.64028700  | H | 5.37265700  | 2.26928300  | -0.16797000 |
| C | -1.78746500 | -4.27448700 | 2.12670900  | C | -0.25136300 | 0.58216000  | 3.27247700  |
| C | -0.98003700 | -3.18761400 | 1.76780100  | C | 0.68722800  | 0.05808800  | 4.17334400  |
| H | -1.03411600 | -2.27366500 | 2.34962700  | H | 1.74762900  | 0.21732400  | 4.00697800  |
| C | -0.81969800 | -6.81461300 | -0.57042000 | C | 0.28190400  | -0.68109300 | 5.29153100  |
| H | 0.13379500  | -6.91511500 | -1.09918800 | C | -1.08641800 | -0.89433000 | 5.49547400  |
| H | -1.61497900 | -6.82094700 | -1.32772700 | H | -1.41175900 | -1.46211500 | 6.36592900  |
| H | -0.95891400 | -7.70607500 | 0.05146800  | C | -2.04693300 | -0.40226700 | 4.60356900  |
| C | -2.72947200 | -4.17571400 | 3.30543300  | C | -1.61451400 | 0.32022200  | 3.48498100  |
| H | -2.29735600 | -3.57086300 | 4.10928700  | H | -2.34748900 | 0.66540000  | 2.76367000  |

|    |             |             |             |              |             |             |             |
|----|-------------|-------------|-------------|--------------|-------------|-------------|-------------|
| C  | -3.52341200 | -0.62461700 | 4.84334300  | H            | -2.59525800 | 3.53557900  | -3.35946200 |
| H  | -4.04964000 | -0.84303400 | 3.90771300  | H            | -4.16033600 | 1.66082300  | -2.83963800 |
| H  | -3.99388400 | 0.26757000  | 5.27767600  | H            | -5.55061400 | 2.89211200  | -4.42410100 |
| H  | -3.69806200 | -1.45523200 | 5.53531700  | H            | -7.40083100 | 4.49269700  | -4.80268300 |
| C  | 1.30372600  | -1.21016200 | 6.27264300  | H            | -8.15711000 | 5.98621800  | -2.96076000 |
| H  | 1.50848700  | -0.48004500 | 7.06758600  | H            | -7.04235700 | 5.85641100  | -0.73857800 |
| H  | 2.25481400  | -1.42782100 | 5.77596700  | H            | -5.19132700 | 4.25344300  | -0.36848200 |
| H  | 0.95335400  | -2.12710700 | 6.75947400  | O            | -1.61865000 | 1.71608100  | -0.78403100 |
| Ru | -0.26076900 | 0.22305100  | -0.13499900 | O            | -1.46273000 | 1.17529700  | -3.09979900 |
| P  | 0.98597800  | -1.80760600 | 0.30677200  | H            | -4.12361400 | 2.09638100  | -1.12847700 |
| P  | 0.24540600  | 1.49759500  | 1.74558300  | C            | 1.73109500  | 0.93407000  | -2.53562600 |
| H  | -3.67708800 | -3.70063600 | 3.01839600  | C            | 3.21043400  | 0.99940600  | -2.89807100 |
| H  | -0.57643000 | 2.81081300  | -2.18435400 | C            | 3.51691100  | 1.16739000  | -4.39577900 |
| C  | -2.44416800 | -1.09658400 | -0.51654700 | C            | 5.00674700  | 1.18554600  | -4.66789200 |
| C  | -3.80150600 | -1.74638900 | -0.65944600 | C            | 5.71474800  | 2.39265300  | -4.74150400 |
| C  | -3.78826000 | -2.97752100 | -1.59012500 | C            | 7.09433300  | 2.40599400  | -4.95755200 |
| C  | -5.14787400 | -3.63542400 | -1.68981500 | C            | 7.79214500  | 1.20593300  | -5.10500800 |
| C  | -5.50555300 | -4.67478600 | -0.81980600 | C            | 7.09927600  | -0.00509900 | -5.03662400 |
| C  | -6.76965200 | -5.26343700 | -0.88552200 | C            | 5.72054000  | -0.01241300 | -4.82017100 |
| C  | -7.70094600 | -4.82001800 | -1.82673200 | H            | -0.30731900 | 0.98636400  | -3.27037000 |
| C  | -7.35725400 | -3.78663200 | -2.70093800 | H            | 3.66249800  | 1.81350800  | -2.31822000 |
| C  | -6.09169900 | -3.20217400 | -2.63159800 | H            | 3.66736700  | 0.07610200  | -2.51929300 |
| H  | -4.16120700 | -2.01186400 | 0.33930100  | H            | 3.04203200  | 0.34848800  | -4.94565600 |
| H  | -4.49464100 | -0.99055200 | -1.05472100 | H            | 5.17681000  | 3.33260100  | -4.63469800 |
| H  | -3.44185900 | -2.66281000 | -2.58017600 | H            | 7.62261300  | 3.35436500  | -5.01635000 |
| H  | -4.78038500 | -5.02704700 | -0.08876200 | H            | 8.86514200  | 1.21399000  | -5.27767100 |
| H  | -7.02577700 | -6.07126300 | -0.20445200 | H            | 7.63228300  | -0.94491300 | -5.15845100 |
| H  | -8.68478700 | -5.27853300 | -1.88155300 | H            | 5.18444100  | -0.95825800 | -4.77212800 |
| H  | -8.07326500 | -3.43799100 | -3.44086800 | O            | 1.45948000  | 0.92894900  | -1.30384600 |
| H  | -5.82954900 | -2.40162700 | -3.32058200 | O            | 0.89951600  | 0.88249300  | -3.50343900 |
| O  | -2.08212200 | -0.61444900 | 0.59887800  | H            | 3.05448000  | 2.09232700  | -4.75830900 |
| O  | -1.64172900 | -1.02549600 | -1.51358300 |              |             |             |             |
| H  | -3.05226200 | -3.69650100 | -1.21219700 | <b>Int12</b> |             |             |             |
| C  | -1.52490900 | 2.28537300  | -1.96667800 | C            | 1.87717000  | -2.36619300 | -1.36923700 |
| C  | -2.71214000 | 3.18136200  | -2.32808600 | C            | 1.28409700  | -2.11386200 | -2.61196900 |
| C  | -4.08247300 | 2.50539500  | -2.14364500 | H            | 0.30788600  | -1.64643500 | -2.65893300 |
| C  | -5.23510600 | 3.45966800  | -2.37066000 | C            | 1.93634300  | -2.45000300 | -3.80717100 |
| C  | -5.87404600 | 3.54433800  | -3.61527000 | C            | 3.19349600  | -3.05613300 | -3.73605300 |
| C  | -6.91767400 | 4.44702200  | -3.82968100 | H            | 3.70773700  | -3.32226100 | -4.65857500 |
| C  | -7.34272200 | 5.28512000  | -2.79734200 | C            | 3.80685600  | -3.33481000 | -2.50637800 |
| C  | -6.71575000 | 5.21181600  | -1.55110500 | C            | 3.13670400  | -2.98732500 | -1.32903500 |
| C  | -5.67370000 | 4.30753500  | -1.34250100 | H            | 3.60638300  | -3.20592700 | -0.37602100 |
| H  | -1.76779800 | 0.35639600  | -2.63266700 | C            | 1.28044900  | -2.13622000 | -5.13180800 |
| H  | -2.65076000 | 4.05901400  | -1.67207800 | H            | 1.00992700  | -1.07522200 | -5.18002100 |

|   |             |             |             |   |             |             |             |
|---|-------------|-------------|-------------|---|-------------|-------------|-------------|
| H | 0.35585800  | -2.71182000 | -5.26608500 | H | -2.51519100 | 6.29516600  | 2.16557200  |
| H | 1.94217100  | -2.36519500 | -5.97374100 | C | -2.40849600 | 4.31507200  | 2.99210300  |
| C | 5.17496800  | -3.97793500 | -2.45674000 | C | -1.75462600 | 3.07210500  | 2.92328600  |
| H | 5.39081300  | -4.38206700 | -1.46236300 | H | -2.03464400 | 2.30136700  | 3.63243100  |
| H | 5.96552400  | -3.25387500 | -2.69519900 | C | -0.59351000 | 6.24450800  | 0.23713200  |
| H | 5.26028400  | -4.79696400 | -3.18050700 | H | -0.21411600 | 7.10574400  | 0.80147200  |
| C | 2.23099500  | -2.12962700 | 1.48150700  | H | -1.43907900 | 6.60349600  | -0.36317500 |
| C | 2.21107600  | -3.19361900 | 2.39242200  | H | 0.19605200  | 5.92629800  | -0.45121900 |
| H | 1.39350300  | -3.90589200 | 2.37850600  | C | -3.50433000 | 4.53868800  | 4.01010300  |
| C | 3.24749300  | -3.37177500 | 3.31750400  | H | -4.41164800 | 3.97834400  | 3.74947800  |
| C | 4.31400700  | -2.46618900 | 3.30968100  | H | -3.77795500 | 5.59656600  | 4.07816600  |
| H | 5.13533500  | -2.60713900 | 4.01042300  | H | -3.19699200 | 4.20541200  | 5.00855100  |
| C | 4.36558200  | -1.39529100 | 2.40841500  | C | 1.86147300  | 2.00201200  | 2.34608700  |
| C | 3.31076500  | -1.23493800 | 1.50086200  | C | 2.03319000  | 2.54209700  | 3.63445800  |
| H | 3.34107500  | -0.42304700 | 0.78082500  | H | 1.25279600  | 2.42423500  | 4.38057900  |
| C | 3.21065200  | -4.52260200 | 4.29827900  | C | 3.18694900  | 3.24966200  | 3.97189500  |
| H | 4.21702600  | -4.79442000 | 4.63440600  | C | 4.16906600  | 3.43816900  | 2.98567600  |
| H | 2.75018700  | -5.41129900 | 3.85312700  | H | 5.06644900  | 4.00345300  | 3.23339400  |
| H | 2.62494700  | -4.26855100 | 5.19167400  | C | 4.01649800  | 2.93547600  | 1.69306600  |
| C | 5.53787600  | -0.44123300 | 2.40773800  | C | 2.85307500  | 2.20747800  | 1.38374100  |
| H | 6.35423300  | -0.81445000 | 3.03482000  | H | 2.70203700  | 1.81499600  | 0.38236600  |
| H | 5.24733700  | 0.54669400  | 2.78398800  | C | 3.38023900  | 3.80874200  | 5.36344600  |
| H | 5.93185800  | -0.29565400 | 1.39488700  | H | 3.67454800  | 4.86466400  | 5.33316200  |
| C | -0.15478100 | -3.38683500 | 0.42651700  | H | 4.16961500  | 3.27094400  | 5.90497600  |
| C | -0.08436700 | -4.51491500 | -0.40387200 | H | 2.46250000  | 3.73230000  | 5.95507200  |
| H | 0.61135500  | -4.53087700 | -1.23576000 | C | 5.06895700  | 3.17527200  | 0.63393200  |
| C | -0.89474100 | -5.63378100 | -0.17604600 | H | 5.93831300  | 3.69927000  | 1.04417600  |
| C | -1.77257400 | -5.61204300 | 0.91457900  | H | 4.67382100  | 3.78192300  | -0.19063800 |
| H | -2.39254200 | -6.48489100 | 1.11477300  | H | 5.42010000  | 2.23388000  | 0.19484700  |
| C | -1.86673200 | -4.50104600 | 1.76041700  | C | -0.28829800 | 0.24196000  | 3.30989300  |
| C | -1.05562200 | -3.38816300 | 1.50120100  | C | 0.63227000  | -0.26453100 | 4.23853100  |
| H | -1.12707300 | -2.51921200 | 2.14689300  | H | 1.69068900  | -0.05519300 | 4.12451700  |
| C | -0.83097900 | -6.83371100 | -1.09418400 | C | 0.21267500  | -1.05123600 | 5.31884200  |
| H | 0.12779000  | -6.88418500 | -1.62033100 | C | -1.15138300 | -1.32995400 | 5.45730400  |
| H | -1.62010500 | -6.79261700 | -1.85669100 | H | -1.48796500 | -1.93276000 | 6.29941600  |
| H | -0.96488800 | -7.77000700 | -0.54069700 | C | -2.09295500 | -0.86096900 | 4.53319700  |
| C | -2.83404400 | -4.49283900 | 2.92266100  | C | -1.64542100 | -0.09447700 | 3.45035800  |
| H | -2.40734200 | -3.97980600 | 3.79082500  | H | -2.36026600 | 0.22052000  | 2.69803000  |
| H | -3.10539200 | -5.51016800 | 3.22459200  | C | -3.56741500 | -1.14995400 | 4.70531500  |
| C | -0.75053200 | 2.83449900  | 1.98400900  | H | -4.05912100 | -1.30034400 | 3.73833600  |
| C | -0.38585200 | 3.87544400  | 1.10961200  | H | -4.07890900 | -0.31473300 | 5.20238600  |
| H | 0.41390400  | 3.71757800  | 0.39036900  | H | -3.73457000 | -2.04303100 | 5.31666600  |
| C | -1.00775500 | 5.12215000  | 1.16243600  | C | 1.21586400  | -1.55882800 | 6.32992500  |
| C | -2.02571000 | 5.32395700  | 2.10955500  | H | 1.37524700  | -0.82823900 | 7.13469400  |

|    |             |             |             |
|----|-------------|-------------|-------------|
| H  | 2.18838600  | -1.74628100 | 5.86326300  |
| H  | 0.87575100  | -2.48798000 | 6.80032900  |
| Ru | -0.24128200 | 0.12425100  | -0.15080200 |
| P  | 0.94004900  | -1.91016700 | 0.16883000  |
| P  | 0.23420600  | 1.24935600  | 1.84893200  |
| H  | -3.76349500 | -3.96877600 | 2.66320900  |
| H  | -0.53557700 | 2.56106500  | -2.31243700 |
| C  | -2.43198900 | -1.14355500 | -0.69266500 |
| C  | -3.77998200 | -1.78236600 | -0.94291100 |
| C  | -3.71584000 | -2.96900900 | -1.92784900 |
| C  | -5.06868600 | -3.61642500 | -2.13229900 |
| C  | -5.48402100 | -4.67947000 | -1.31799900 |
| C  | -6.74344100 | -5.25920200 | -1.48022900 |
| C  | -7.61231200 | -4.78346000 | -2.46438700 |
| C  | -7.21043200 | -3.72696600 | -3.28447500 |
| C  | -5.94977100 | -3.15112500 | -3.11850000 |
| H  | -4.19567300 | -2.09272800 | 0.02059400  |
| H  | -4.45070500 | -1.00820900 | -1.34181400 |
| H  | -3.31534500 | -2.61089400 | -2.88189500 |
| H  | -4.80742500 | -5.05879400 | -0.55452800 |
| H  | -7.04438100 | -6.08574900 | -0.84118100 |
| H  | -8.59220000 | -5.23523700 | -2.59456200 |
| H  | -7.87672800 | -3.35362800 | -4.05806200 |
| H  | -5.64130100 | -2.33321400 | -3.76666200 |
| O  | -2.13420000 | -0.70884400 | 0.46405400  |
| O  | -1.57777300 | -1.02278300 | -1.63284000 |
| H  | -3.00246700 | -3.70663900 | -1.54289900 |
| C  | -1.48253000 | 2.49023400  | -1.76675500 |
| C  | -2.57931700 | 3.43951300  | -2.15352200 |
| C  | -3.94376100 | 3.13112200  | -1.51735900 |
| C  | -4.96620500 | 4.21137400  | -1.79813600 |
| C  | -5.73326400 | 4.19448100  | -2.97134200 |
| C  | -6.65280800 | 5.20929400  | -3.24180200 |
| C  | -6.82135700 | 6.26201100  | -2.33967300 |
| C  | -6.06454600 | 6.29047100  | -1.16658400 |
| C  | -5.14642400 | 5.27311200  | -0.90018400 |
| H  | -1.98125700 | 0.14714000  | -3.08413000 |
| H  | -2.23507500 | 4.44228400  | -1.85094500 |
| H  | -2.63831900 | 3.45095700  | -3.24669500 |
| H  | -4.29201300 | 2.16672900  | -1.90597800 |
| H  | -5.60965500 | 3.37529400  | -3.67669800 |
| H  | -7.24061800 | 5.17552100  | -4.15566300 |
| H  | -7.53934200 | 7.05108800  | -2.54736200 |
| H  | -6.19313600 | 7.10263000  | -0.45517100 |

|   |             |             |             |
|---|-------------|-------------|-------------|
| H | -4.56282700 | 5.29607700  | 0.01836900  |
| O | -1.57555900 | 1.74453300  | -0.78834200 |
| O | -1.84237000 | 0.89433300  | -3.69695100 |
| H | -3.81138700 | 3.00835700  | -0.43772600 |
| C | 1.76015600  | 1.04040200  | -2.35199500 |
| C | 3.24194300  | 1.24210400  | -2.69669100 |
| C | 3.50396000  | 1.60035500  | -4.16855800 |
| C | 4.97978000  | 1.74549600  | -4.47302000 |
| C | 5.59377900  | 3.00471900  | -4.51089300 |
| C | 6.96090600  | 3.13333000  | -4.76569500 |
| C | 7.74183000  | 1.99808600  | -4.98863000 |
| C | 7.14406300  | 0.73573600  | -4.95503600 |
| C | 5.77777400  | 0.61379700  | -4.69997200 |
| H | -0.86304000 | 0.92391200  | -3.72782700 |
| H | 3.65610800  | 2.01281700  | -2.03437200 |
| H | 3.76415000  | 0.31245700  | -2.43479500 |
| H | 3.06188300  | 0.82258400  | -4.80007400 |
| H | 4.99046400  | 3.89521500  | -4.34562100 |
| H | 7.41430300  | 4.12114900  | -4.79559400 |
| H | 8.80516100  | 2.09554300  | -5.19171600 |
| H | 7.74228000  | -0.15450700 | -5.13383100 |
| H | 5.31707100  | -0.37209000 | -4.67869900 |
| O | 1.54882000  | 0.87178800  | -1.09031500 |
| O | 0.91079400  | 1.04498900  | -3.26081300 |
| H | 2.97477500  | 2.52842500  | -4.41293200 |

**TS4-6**

|   |             |             |            |
|---|-------------|-------------|------------|
| C | 1.07997700  | 0.13079800  | 3.04128400 |
| C | 0.74307400  | 1.48363300  | 3.14829500 |
| H | 0.50019700  | 2.05089500  | 2.25910500 |
| C | 0.72896700  | 2.12978000  | 4.39452900 |
| C | 1.06464000  | 1.39694100  | 5.53340300 |
| H | 1.05496400  | 1.89017000  | 6.50440600 |
| C | 1.41442000  | 0.04032000  | 5.45912400 |
| C | 1.41655700  | -0.58008800 | 4.20849500 |
| H | 1.68389000  | -1.63012400 | 4.14573700 |
| C | 0.34689200  | 3.58972500  | 4.48386600 |
| H | 0.97301700  | 4.20612000  | 3.82768000 |
| H | 0.45121900  | 3.96992400  | 5.50528800 |
| H | -0.69325500 | 3.74615500  | 4.17170900 |
| C | 1.77139500  | -0.72967200 | 6.71089800 |
| H | 2.08526500  | -1.75147300 | 6.47496100 |
| H | 0.91776900  | -0.79438400 | 7.39784900 |
| H | 2.58854400  | -0.24598700 | 7.26051900 |

|   |             |             |             |    |             |             |             |
|---|-------------|-------------|-------------|----|-------------|-------------|-------------|
| C | 0.80678700  | -2.45607400 | 1.88963700  | H  | -1.70275200 | 2.53731200  | -6.23288900 |
| C | 1.81116800  | -3.43437600 | 1.87331700  | H  | -0.18561200 | 2.02806600  | -5.47028700 |
| H | 2.79615700  | -3.19397600 | 1.48817800  | C  | -5.19626900 | -0.86504800 | -4.99232100 |
| C | 1.57219100  | -4.72396300 | 2.36337600  | H  | -5.61666500 | -1.65917300 | -4.36712900 |
| C | 0.29907100  | -5.02629300 | 2.86189000  | H  | -5.08961500 | -1.26218000 | -6.00990200 |
| H | 0.10242100  | -6.02577500 | 3.24656500  | H  | -5.93289200 | -0.05330400 | -5.04076400 |
| C | -0.72417300 | -4.07213300 | 2.89216400  | C  | -2.66179100 | -2.20216500 | -0.49680500 |
| C | -0.45433800 | -2.78707200 | 2.40274400  | C  | -3.13975200 | -3.40123700 | -1.05609900 |
| H | -1.23602200 | -2.03405200 | 2.43808500  | H  | -2.65173400 | -3.82217600 | -1.93029700 |
| C | 2.67898700  | -5.75444900 | 2.39412300  | C  | -4.23917000 | -4.06619700 | -0.50724400 |
| H | 3.17248400  | -5.77633000 | 3.37511700  | C  | -4.86893600 | -3.50479400 | 0.61467200  |
| H | 3.44932400  | -5.53683400 | 1.64726600  | H  | -5.73667500 | -4.00643000 | 1.04055900  |
| H | 2.29619400  | -6.76324900 | 2.20359800  | C  | -4.41276600 | -2.32072500 | 1.19827400  |
| C | -2.08893300 | -4.41397800 | 3.44500500  | C  | -3.29663900 | -1.68004600 | 0.63549500  |
| H | -2.10089500 | -5.41643900 | 3.88513800  | H  | -2.92425800 | -0.76260600 | 1.08510800  |
| H | -2.85492200 | -4.37888200 | 2.66149300  | C  | -4.74233000 | -5.36282400 | -1.10083100 |
| H | -2.39170200 | -3.70267500 | 4.22316500  | H  | -4.26112300 | -5.57722800 | -2.06037200 |
| C | 2.90618900  | -0.71144100 | 0.92329800  | H  | -5.82601700 | -5.33393900 | -1.26608200 |
| C | 3.89742900  | -0.17167600 | 1.75230800  | H  | -4.54202600 | -6.21130800 | -0.43359500 |
| H | 3.62333500  | 0.27566200  | 2.70239500  | C  | -5.09378100 | -1.73199100 | 2.41316300  |
| C | 5.24840900  | -0.20596700 | 1.37878100  | H  | -5.36034800 | -0.68142000 | 2.24930500  |
| C | 5.58999300  | -0.80418900 | 0.16093400  | H  | -4.43617300 | -1.75942300 | 3.29129200  |
| H | 6.63856300  | -0.85421200 | -0.12969200 | H  | -6.00869600 | -2.27829300 | 2.66463000  |
| C | 4.61932200  | -1.34461500 | -0.69298000 | C  | -0.16364000 | -2.50913200 | -1.98456400 |
| C | 3.27705500  | -1.28432500 | -0.30320100 | C  | 0.06105500  | -3.73226000 | -1.33054100 |
| H | 2.51453600  | -1.68659400 | -0.96327500 | H  | -0.45008400 | -3.95200100 | -0.39895700 |
| C | 6.30897300  | 0.40394800  | 2.26822000  | C  | 0.92399900  | -4.69146000 | -1.87098000 |
| H | 6.48118900  | 1.45882500  | 2.01591500  | C  | 1.58880500  | -4.39907000 | -3.06971200 |
| H | 7.26786800  | -0.11536500 | 2.16282500  | H  | 2.25857600  | -5.14205100 | -3.50029800 |
| H | 6.01683400  | 0.36714000  | 3.32303200  | C  | 1.40307500  | -3.18245600 | -3.73218100 |
| C | 5.00950500  | -1.95724800 | -2.01929300 | C  | 0.51869400  | -2.24647400 | -3.17896400 |
| H | 4.29115600  | -2.72271600 | -2.33005500 | H  | 0.35969500  | -1.30773200 | -3.69834200 |
| H | 6.00333700  | -2.41644300 | -1.97241700 | C  | 2.13645500  | -2.87087700 | -5.01746400 |
| C | -2.08699300 | -0.49528000 | -2.78866100 | H  | 2.94294000  | -2.14533200 | -4.84934400 |
| C | -1.42258500 | 0.54951700  | -3.44520300 | H  | 1.46389200  | -2.43567200 | -5.76543900 |
| H | -0.48407400 | 0.92629100  | -3.05138900 | H  | 2.58635700  | -3.77055800 | -5.45008200 |
| C | -1.95924400 | 1.13368100  | -4.60150000 | C  | 1.10876200  | -6.03407700 | -1.20091700 |
| C | -3.17853100 | 0.65831900  | -5.08835100 | H  | 0.56164600  | -6.82207500 | -1.73589500 |
| H | -3.60522500 | 1.10980000  | -5.98293200 | H  | 0.74436400  | -6.01698100 | -0.16996600 |
| C | -3.87208200 | -0.37762500 | -4.44799500 | H  | 2.16377500  | -6.33193400 | -1.18408300 |
| C | -3.31544500 | -0.94578500 | -3.29859900 | Ru | -0.21564500 | 0.49508100  | -0.14413000 |
| H | -3.85583000 | -1.74041400 | -2.79593700 | P  | 1.11009100  | -0.69635800 | 1.37548000  |
| C | -1.23617600 | 2.27631300  | -5.27732300 | P  | -1.29188900 | -1.21994700 | -1.26651700 |
| H | -1.24295100 | 3.17220600  | -4.64380800 | H  | 5.03945200  | -1.19768300 | -2.81224500 |

|   |             |            |             |   |             |             |             |
|---|-------------|------------|-------------|---|-------------|-------------|-------------|
| H | -3.09239100 | 0.78619900 | -0.64062900 | C | 0.24816400  | -2.87137600 | 0.61842300  |
| C | 1.80775600  | 1.82604600 | -0.96527400 | C | -0.38276200 | -3.53500200 | -0.44687200 |
| C | 2.92822000  | 2.61623800 | -1.60373100 | H | -1.14142100 | -3.01904100 | -1.02513100 |
| C | 3.86666600  | 3.27287400 | -0.57037500 | C | -0.03651900 | -4.84712300 | -0.79185000 |
| C | 4.99533800  | 4.03983200 | -1.22527600 | C | 0.96876900  | -5.49474400 | -0.06341900 |
| C | 6.19060500  | 3.39524500 | -1.57480300 | H | 1.24676900  | -6.51440700 | -0.32756500 |
| C | 7.22308100  | 4.08971200 | -2.20709200 | C | 1.61975400  | -4.86144800 | 1.00005600  |
| C | 7.07714700  | 5.44708900 | -2.50158400 | C | 1.24466300  | -3.55247900 | 1.33457500  |
| C | 5.89292000  | 6.10208800 | -2.15761600 | H | 1.74596400  | -3.06951500 | 2.16582000  |
| C | 4.86349700  | 5.40273300 | -1.52509100 | C | -0.75574400 | -5.55638100 | -1.91786600 |
| H | 3.48235800  | 1.94979100 | -2.27199600 | H | -0.09686500 | -6.26371400 | -2.43416100 |
| H | 2.47320000  | 3.39247700 | -2.23490900 | H | -1.13888300 | -4.84360300 | -2.65512100 |
| H | 3.27335000  | 3.93500800 | 0.06827600  | H | -1.61428000 | -6.12942100 | -1.54196500 |
| H | 6.31076200  | 2.33858900 | -1.34308800 | C | 2.72464400  | -5.56118500 | 1.76121700  |
| H | 8.14351700  | 3.57215000 | -2.46603700 | H | 2.57056000  | -6.64569400 | 1.78492200  |
| H | 7.88108100  | 5.99059600 | -2.99102400 | H | 2.78590900  | -5.20491200 | 2.79514700  |
| H | 5.77162200  | 7.15985900 | -2.37730600 | H | 3.70494100  | -5.38200800 | 1.29873200  |
| H | 3.94583100  | 5.92105500 | -1.25424900 | C | 0.95445800  | -0.75523300 | 2.38341200  |
| O | 1.39444000  | 0.74959700 | -1.52459200 | C | 0.65590400  | -0.97635100 | 3.73382700  |
| O | 1.25589500  | 2.21109300 | 0.10925600  | H | -0.33860300 | -1.30619900 | 4.01932600  |
| H | 4.27442100  | 2.48956500 | 0.07917900  | C | 1.62532600  | -0.79072500 | 4.72806500  |
| C | -2.69660000 | 1.66136800 | -0.11364500 | C | 2.90946600  | -0.38359100 | 4.34445700  |
| C | -3.83097500 | 2.64307600 | 0.17771600  | H | 3.67318900  | -0.24725600 | 5.10871200  |
| C | -3.40068200 | 3.92621400 | 0.91404400  | C | 3.23827400  | -0.15405600 | 3.00251200  |
| C | -4.55655300 | 4.87444700 | 1.14848800  | C | 2.24637300  | -0.33791600 | 2.03009900  |
| C | -5.31419900 | 4.81206000 | 2.32658400  | H | 2.48612700  | -0.16730900 | 0.98421000  |
| C | -6.39918400 | 5.66620900 | 2.53186300  | C | 1.28622600  | -1.00877100 | 6.18549900  |
| C | -6.74757400 | 6.60364500 | 1.55743500  | H | 0.49240200  | -1.75388500 | 6.30369800  |
| C | -6.00122100 | 6.67890800 | 0.37937300  | H | 0.93318200  | -0.08096200 | 6.65545400  |
| C | -4.91733800 | 5.82249600 | 0.18007700  | H | 2.15891900  | -1.34844800 | 6.75412400  |
| H | -4.29416300 | 2.90465500 | -0.78313700 | C | 4.63791600  | 0.25425200  | 2.60107000  |
| H | -4.59660200 | 2.11567900 | 0.76347000  | H | 5.20096400  | 0.64783800  | 3.45424400  |
| H | -2.94796500 | 3.64793300 | 1.87293200  | H | 4.61877800  | 1.02080600  | 1.81857900  |
| H | -5.04515900 | 4.08789500 | 3.09312600  | H | 5.20177800  | -0.60027800 | 2.20363500  |
| H | -6.96952200 | 5.60259100 | 3.45544000  | C | -1.85890400 | -1.30680500 | 1.89831200  |
| H | -7.58963800 | 7.27229200 | 1.71643200  | C | -2.33709900 | -2.54019500 | 2.37023100  |
| H | -6.25978700 | 7.40920300 | -0.38355100 | H | -1.74807300 | -3.44026000 | 2.22094500  |
| H | -4.33655100 | 5.89134500 | -0.73757400 | C | -3.56626300 | -2.63031000 | 3.03115000  |
| O | -1.58275100 | 2.23643000 | -0.77862700 | C | -4.31140200 | -1.45718600 | 3.22229800  |
| O | -1.95092800 | 1.28647700 | 1.07170200  | H | -5.26707400 | -1.51550500 | 3.74173200  |
| H | -2.62317300 | 4.42297700 | 0.32265600  | C | -3.86091800 | -0.21616700 | 2.76348900  |
| H | -1.31354700 | 2.20220200 | 0.49194300  | C | -2.63097200 | -0.15563700 | 2.09309000  |
|   |             |            |             | H | -2.27879800 | 0.79625200  | 1.70745100  |
|   |             |            |             | C | -4.08607400 | -3.96021200 | 3.53010600  |

Int13

|   |             |             |             |    |             |             |             |
|---|-------------|-------------|-------------|----|-------------|-------------|-------------|
| H | -5.00596400 | -4.25199000 | 3.00734800  | C  | -1.25662100 | 3.99258200  | 3.72087400  |
| H | -4.32380000 | -3.92294300 | 4.60057700  | H  | -1.63486800 | 4.37941200  | 4.66614700  |
| H | -3.35183000 | -4.75748500 | 3.37719600  | C  | -1.90075700 | 4.34152900  | 2.53323100  |
| C | -4.68034400 | 1.03909900  | 2.96167800  | C  | -1.38455500 | 3.85723000  | 1.32237600  |
| H | -4.06984500 | 1.84835900  | 3.37929100  | H  | -1.87258200 | 4.14733100  | 0.39888800  |
| H | -5.52494800 | 0.86564600  | 3.63685900  | C  | -3.13121700 | 5.22090200  | 2.53859800  |
| C | -0.34511500 | 3.63625300  | -1.50916100 | H  | -4.04264200 | 4.63103900  | 2.37415000  |
| C | -1.61507400 | 3.45195800  | -2.07762700 | H  | -3.08845400 | 5.97371700  | 1.74333000  |
| H | -2.17453500 | 2.54842000  | -1.85354700 | H  | -3.24566600 | 5.74347800  | 3.49406800  |
| C | -2.18038800 | 4.42513000  | -2.91404200 | C  | 0.54926200  | 2.81055500  | 5.02986200  |
| C | -1.45722300 | 5.59434500  | -3.17033000 | H  | -0.12529900 | 2.24958100  | 5.68953800  |
| H | -1.89081600 | 6.35821500  | -3.81418700 | H  | 0.85054700  | 3.71452100  | 5.57429300  |
| C | -0.19024800 | 5.80720900  | -2.61513800 | H  | 1.43995300  | 2.19771200  | 4.86726500  |
| C | 0.35196600  | 4.82142300  | -1.78226600 | Ru | -0.22841700 | 0.23140400  | -1.00541500 |
| H | 1.33059200  | 4.98893700  | -1.34384300 | P  | -0.24770500 | -1.10849300 | 1.01186400  |
| C | -3.53629300 | 4.19661700  | -3.54371300 | P  | 0.35334400  | 2.35597200  | -0.33917500 |
| H | -3.44915600 | 3.61046500  | -4.46838500 | H  | -5.08433200 | 1.40229000  | 2.00785600  |
| H | -4.02416200 | 5.14271700  | -3.80217300 | H  | 1.37799400  | -0.78014600 | -3.27724800 |
| H | -4.20085400 | 3.64172300  | -2.87275500 | C  | -2.66856300 | -0.45940600 | -1.61111000 |
| C | 0.58853600  | 7.06547100  | -2.92651400 | C  | -4.14083900 | -0.67776800 | -1.90456500 |
| H | 1.17734700  | 6.95068800  | -3.84663600 | C  | -4.58138700 | -2.13165800 | -1.62989500 |
| H | 1.28924700  | 7.31254000  | -2.12193200 | C  | -6.05261000 | -2.35593000 | -1.90354500 |
| H | -0.07697700 | 7.92348200  | -3.07310900 | C  | -7.00593200 | -2.17638100 | -0.89129300 |
| C | 2.15642700  | 2.76596700  | -0.43584600 | C  | -8.36682900 | -2.35474500 | -1.14557700 |
| C | 2.89462800  | 3.43137300  | 0.54712600  | C  | -8.79955500 | -2.71764600 | -2.42273200 |
| H | 2.41633300  | 3.75180000  | 1.46721800  | C  | -7.86103200 | -2.90096200 | -3.44047300 |
| C | 4.25611400  | 3.71972300  | 0.35342700  | C  | -6.50139900 | -2.72147300 | -3.18049900 |
| C | 4.85556900  | 3.34138100  | -0.85033400 | H  | -4.72658600 | 0.02689700  | -1.30621400 |
| H | 5.90695100  | 3.57395100  | -1.01446100 | H  | -4.32028300 | -0.43512700 | -2.96096500 |
| C | 4.13277800  | 2.68877800  | -1.86100200 | H  | -3.97131300 | -2.79839100 | -2.24805800 |
| C | 2.78344500  | 2.40323300  | -1.64202400 | H  | -6.67337500 | -1.89943900 | 0.10726200  |
| H | 2.18492500  | 1.92271800  | -2.41489900 | H  | -9.08908100 | -2.21474300 | -0.34501600 |
| C | 5.04963900  | 4.42341000  | 1.43216200  | H  | -9.85838200 | -2.86059300 | -2.62221500 |
| H | 5.38893200  | 3.71881600  | 2.20330700  | H  | -8.18699800 | -3.18909900 | -4.43684000 |
| H | 4.44819200  | 5.18740600  | 1.93733500  | H  | -5.77528000 | -2.87200500 | -3.97694300 |
| H | 5.94002100  | 4.91083200  | 1.02108400  | O  | -2.31877200 | 0.60139600  | -0.97715400 |
| C | 4.80655500  | 2.30344800  | -3.15938100 | O  | -1.79754000 | -1.29861500 | -1.96363700 |
| H | 5.42275000  | 3.12153700  | -3.55089700 | H  | -4.35724700 | -2.37563100 | -0.58414000 |
| H | 4.07052300  | 2.03991500  | -3.92549600 | C  | 2.05141900  | -1.00369500 | -2.43804600 |
| H | 5.47209300  | 1.43937400  | -3.02573900 | C  | 3.29225700  | -1.80972000 | -2.67911200 |
| C | -0.25855300 | 3.02391300  | 1.28744000  | C  | 4.16101100  | -2.04492900 | -1.43249700 |
| C | 0.34919700  | 2.66890300  | 2.50582800  | C  | 5.33233000  | -2.96288500 | -1.71000200 |
| H | 1.20735400  | 2.00689800  | 2.51200400  | C  | 6.59069300  | -2.44975100 | -2.05089800 |
| C | -0.12913100 | 3.15950500  | 3.72478200  | C  | 7.66120500  | -3.30089300 | -2.33248900 |

|   |             |             |             |   |             |             |             |
|---|-------------|-------------|-------------|---|-------------|-------------|-------------|
| C | 7.48872700  | -4.68504700 | -2.27652300 | H | -3.53590700 | -4.87127600 | 4.74697100  |
| C | 6.23990500  | -5.21023300 | -1.93623700 | H | -1.95360500 | -5.25965000 | 4.04763200  |
| C | 5.17301200  | -4.35552500 | -1.65525300 | H | -3.40947000 | -5.36651100 | 3.05591900  |
| H | 2.96742300  | -2.76711600 | -3.11664800 | C | -4.62862300 | -0.01535600 | 3.73868600  |
| H | 3.86359300  | -1.31808000 | -3.48156800 | H | -5.43568300 | -0.46609200 | 4.32543100  |
| H | 4.51564300  | -1.07662300 | -1.06095500 | H | -5.07188200 | 0.43855900  | 2.84493800  |
| H | 6.73493300  | -1.37164900 | -2.08930400 | H | -4.19847900 | 0.79927900  | 4.33475000  |
| H | 8.63051500  | -2.88226100 | -2.59106600 | C | 1.02749300  | -2.55168500 | 1.15595600  |
| H | 8.32131100  | -5.34932100 | -2.49220100 | C | 2.07763800  | -3.00803400 | 1.96499800  |
| H | 6.09750300  | -6.28669500 | -1.88489800 | H | 2.37560900  | -2.43540900 | 2.83750800  |
| H | 4.20298600  | -4.76977700 | -1.38654700 | C | 2.75149500  | -4.19945900 | 1.66820800  |
| O | 0.06181000  | 0.87933900  | -2.93986500 | C | 2.34701900  | -4.93479500 | 0.54700300  |
| O | 1.75557200  | -0.57885900 | -1.31809400 | H | 2.85445700  | -5.87051000 | 0.31519800  |
| H | 3.52864100  | -2.46795300 | -0.64431800 | C | 1.30567100  | -4.50090800 | -0.28226600 |
| H | -0.50508200 | 1.62818400  | -3.17354500 | C | 0.65415900  | -3.30205000 | 0.03218200  |

**TS6-14**

|   |             |             |            |   |             |             |             |
|---|-------------|-------------|------------|---|-------------|-------------|-------------|
| C | 1.00053900  | -0.27166000 | 2.98049500 | H | 4.86830500  | -4.41561800 | 2.08161100  |
| C | 2.06361100  | 0.61643800  | 2.77711000 | H | 3.88393700  | -5.76331000 | 2.65640600  |
| H | 2.35122600  | 0.88618400  | 1.76894200 | H | 3.86933600  | -4.21737200 | 3.52445000  |
| C | 2.77240200  | 1.15330700  | 3.86216600 | C | 0.90977900  | -5.29015800 | -1.50976400 |
| C | 2.39806000  | 0.78878800  | 5.15723800 | H | -0.16101200 | -5.19340000 | -1.71706200 |
| H | 2.94346600  | 1.20231900  | 6.00466200 | H | 1.14507600  | -6.35422600 | -1.39624600 |
| C | 1.33812400  | -0.09727100 | 5.39329900 | C | -2.04382800 | 1.17183900  | -2.80953600 |
| C | 0.64864900  | -0.62122200 | 4.29640100 | C | -0.90790100 | 1.06864600  | -3.62688400 |
| H | -0.16966800 | -1.31015300 | 4.47744700 | H | -0.04291500 | 0.51214100  | -3.27953100 |
| C | 3.90880900  | 2.12119000  | 3.62007100 | C | -0.86775300 | 1.67804600  | -4.88786000 |
| H | 3.53985600  | 3.08325100  | 3.24172000 | C | -1.98197500 | 2.40348500  | -5.31955000 |
| H | 4.60984900  | 1.73430300  | 2.87144000 | H | -1.95945200 | 2.87949200  | -6.29892200 |
| H | 4.46991100  | 2.31928200  | 4.53947700 | C | -3.12489100 | 2.53550700  | -4.52188800 |
| C | 0.94899100  | -0.47040700 | 6.80661200 | C | -3.14482400 | 1.91069300  | -3.26996200 |
| H | 0.55313800  | 0.39418400  | 7.35536400 | H | -4.03388700 | 2.00668000  | -2.65646000 |
| H | 1.80995800  | -0.84285700 | 7.37554800 | C | 0.37456700  | 1.57318200  | -5.74342800 |
| H | 0.17902100  | -1.24861800 | 6.81647000 | H | 1.16074200  | 2.24711800  | -5.37876600 |
| C | -1.44159300 | -1.59633100 | 2.33101300 | H | 0.16832800  | 1.83818300  | -6.78587700 |
| C | -1.60832900 | -2.93125700 | 2.72411900 | H | 0.78937500  | 0.55904500  | -5.72530600 |
| H | -0.84150900 | -3.66259800 | 2.48908600 | C | -4.30648900 | 3.35055200  | -4.99870400 |
| C | -2.74465100 | -3.33837400 | 3.43471300 | H | -4.53763900 | 3.14512900  | -6.05055100 |
| C | -3.71578200 | -2.37967300 | 3.74966200 | H | -4.10823900 | 4.42774200  | -4.91775900 |
| H | -4.59637900 | -2.68239500 | 4.31380400 | H | -5.20374700 | 3.13765700  | -4.40846800 |
| C | -3.57770000 | -1.03846400 | 3.37268300 | C | -3.60430300 | 0.96038000  | -0.40302100 |
| C | -2.43241800 | -0.66231000 | 2.65895200 | C | -4.86531900 | 0.40933700  | -0.67033900 |
| H | -2.30654600 | 0.37549200  | 2.36313700 | H | -4.94598800 | -0.48085900 | -1.28589300 |
| C | -2.91887800 | -4.78303400 | 3.84626400 | C | -6.03655700 | 0.99681900  | -0.17233700 |



|    |             |             |             |              |             |             |             |
|----|-------------|-------------|-------------|--------------|-------------|-------------|-------------|
| C  | -5.92849000 | 2.16279600  | 0.59428300  | H            | 3.09558000  | -1.92977400 | -2.57249100 |
| H  | -6.83367400 | 2.63555600  | 0.97232800  | H            | 3.74778000  | -0.30593600 | -2.77123000 |
| C  | -4.68532600 | 2.74042400  | 0.88017500  | H            | 4.90756800  | -0.45983400 | -0.56987400 |
| C  | -3.53351400 | 2.12643200  | 0.37451700  | H            | 5.07677800  | -4.01283200 | -1.59393300 |
| H  | -2.56618800 | 2.57371000  | 0.57669700  | H            | 6.95511100  | -5.02058000 | -2.85908800 |
| C  | -7.38670100 | 0.37526500  | -0.45055900 | H            | 8.73652600  | -3.56856200 | -3.81455200 |
| H  | -7.40055600 | -0.13574200 | -1.41904400 | H            | 8.62100900  | -1.10433600 | -3.48639300 |
| H  | -8.18224100 | 1.12812100  | -0.45151900 | H            | 6.74182100  | -0.10597900 | -2.22075700 |
| H  | -7.64492500 | -0.37050400 | 0.31317900  | O            | 1.04793100  | -0.77550000 | -1.67600100 |
| C  | -4.58926200 | 3.98625400  | 1.73144100  | O            | 2.37995600  | 0.31500900  | -0.30563100 |
| H  | -5.43454500 | 4.65982000  | 1.55259300  | H            | 4.24747200  | -2.06805800 | -0.30962900 |
| H  | -3.66653200 | 4.54023800  | 1.53013100  | C            | -0.03024900 | 3.30210000  | -0.77662300 |
| H  | -4.59430600 | 3.73795100  | 2.80131800  | C            | 0.63251100  | 4.58352000  | -0.33701600 |
| C  | -2.47947200 | -1.44145900 | -1.60980300 | C            | 2.09340500  | 4.39422300  | 0.10561600  |
| C  | -3.10090000 | -2.28510300 | -0.67033700 | C            | 2.73030600  | 5.68492600  | 0.57230400  |
| H  | -3.35871700 | -1.90539500 | 0.31262400  | C            | 2.55704800  | 6.13471600  | 1.88992100  |
| C  | -3.41191700 | -3.61112000 | -0.98246400 | C            | 3.12110200  | 7.33652300  | 2.32073100  |
| C  | -3.07069400 | -4.10147300 | -2.25180100 | C            | 3.87257600  | 8.11489100  | 1.43737400  |
| H  | -3.31320500 | -5.13235400 | -2.50583400 | C            | 4.05473500  | 7.67979400  | 0.12322000  |
| C  | -2.43759400 | -3.29532400 | -3.19928000 | C            | 3.48833900  | 6.47650700  | -0.30179700 |
| C  | -2.15355000 | -1.96196800 | -2.86629300 | H            | -0.97179300 | 2.20621600  | 1.54890200  |
| H  | -1.67918600 | -1.33009900 | -3.60875700 | H            | 0.57417400  | 5.28981400  | -1.18175900 |
| C  | -2.06264200 | -3.83267000 | -4.56202500 | H            | 0.03168000  | 5.01981800  | 0.46956400  |
| H  | -0.97303200 | -3.88515900 | -4.68152900 | H            | 2.09761600  | 3.64944300  | 0.90784600  |
| H  | -2.44227800 | -3.18851900 | -5.36414600 | H            | 1.97542400  | 5.53114800  | 2.58415300  |
| H  | -2.46358000 | -4.83914800 | -4.72033600 | H            | 2.97791400  | 7.66308800  | 3.34791000  |
| C  | -4.10962800 | -4.50449500 | 0.01790900  | H            | 4.31574400  | 9.04944500  | 1.77146600  |
| H  | -5.05538100 | -4.89038000 | -0.38352500 | H            | 4.64277200  | 8.27496700  | -0.57118500 |
| H  | -4.32868300 | -3.96772900 | 0.94527800  | H            | 3.64091700  | 6.14053900  | -1.32553600 |
| H  | -3.49149600 | -5.37488600 | 0.27301100  | O            | 0.60318000  | 2.39562300  | -1.35930700 |
| Ru | 0.08646200  | 0.54954400  | -0.24981400 | O            | -0.15808600 | 2.21134400  | 1.02290100  |
| P  | 0.10625300  | -0.98412000 | 1.51088500  | H            | 2.66207000  | 3.96522800  | -0.72535300 |
| P  | -2.03123800 | 0.30786300  | -1.15735800 |              |             |             |             |
| H  | 1.44406800  | -4.92988400 | -2.39920000 |              |             |             |             |
| H  | -1.12818600 | 3.33510200  | -0.84967200 | <b>Int14</b> |             |             |             |
| C  | 2.22821400  | -0.46769400 | -1.28881800 | C            | 2.46255600  | 0.89472900  | 2.49337400  |
| C  | 3.42343800  | -1.04217200 | -2.02237900 | C            | 1.69751600  | 1.93756300  | 3.03976100  |
| C  | 4.60099900  | -1.37666000 | -1.08355300 | H            | 0.86043800  | 2.33685400  | 2.47820800  |
| C  | 5.77088600  | -1.98775500 | -1.82403700 | C            | 2.00764100  | 2.48270100  | 4.29319600  |
| C  | 5.85169100  | -3.37465800 | -2.01449900 | C            | 3.09673500  | 1.96684100  | 5.00240700  |
| C  | 6.90953100  | -3.94235400 | -2.72647600 | H            | 3.34065000  | 2.38049400  | 5.98015500  |
| C  | 7.91005100  | -3.12868400 | -3.26244800 | C            | 3.88164900  | 0.93123300  | 4.48356000  |
| C  | 7.84388000  | -1.74599300 | -3.07848800 | C            | 3.55612400  | 0.40677700  | 3.22700800  |
| C  | 6.78371200  | -1.18371600 | -2.36528000 | H            | 4.16693100  | -0.39414800 | 2.82562000  |
|    |             |             |             | C            | 1.19224500  | 3.62745400  | 4.85216000  |

|   |             |             |             |   |             |             |             |
|---|-------------|-------------|-------------|---|-------------|-------------|-------------|
| H | 1.12152200  | 3.57505000  | 5.94449900  | C | -4.74326100 | -1.70355700 | -2.64344800 |
| H | 0.17663900  | 3.62869400  | 4.44353000  | H | -5.73029200 | -1.63936000 | -3.09979400 |
| H | 1.64491900  | 4.59680200  | 4.60287200  | C | -4.33556300 | -2.90813600 | -2.06358900 |
| C | 5.04061200  | 0.36941600  | 5.27648100  | C | -3.06430000 | -2.97677100 | -1.47524400 |
| H | 4.69425300  | -0.33962700 | 6.04048000  | H | -2.75197900 | -3.91048500 | -1.02066300 |
| H | 5.59203300  | 1.16045700  | 5.79768300  | C | -4.36217300 | 0.71568000  | -3.29359800 |
| H | 5.74478800  | -0.16588500 | 4.63110800  | H | -3.82803500 | 1.57592700  | -2.87783000 |
| C | 3.07314300  | -1.31060800 | 0.80109500  | H | -5.43674900 | 0.88236100  | -3.15715800 |
| C | 4.32941400  | -1.36942600 | 0.18324900  | H | -4.17244900 | 0.70464800  | -4.37560300 |
| H | 4.69186600  | -0.52167300 | -0.39007400 | C | -5.23256100 | -4.12608600 | -2.08927900 |
| C | 5.13982300  | -2.50348200 | 0.31423900  | H | -5.11721200 | -4.72833900 | -1.18137900 |
| C | 4.66474600  | -3.57869400 | 1.07693300  | H | -4.99568800 | -4.77803900 | -2.94107500 |
| H | 5.29289800  | -4.46011900 | 1.19763300  | H | -6.28774900 | -3.84589100 | -2.17924500 |
| C | 3.41356600  | -3.54577800 | 1.70498800  | C | -0.49224700 | -3.60213400 | 0.07038100  |
| C | 2.61995300  | -2.39918200 | 1.55834500  | C | -0.33854300 | -4.76861800 | -0.69830000 |
| H | 1.65158100  | -2.32977200 | 2.04982500  | H | -0.13901200 | -4.69392000 | -1.76325000 |
| C | 6.49654300  | -2.56683600 | -0.35115300 | C | -0.44480200 | -6.03550800 | -0.11615100 |
| H | 6.91481500  | -1.56571200 | -0.49985500 | C | -0.72538200 | -6.11932600 | 1.25533100  |
| H | 6.43755400  | -3.04419200 | -1.33817100 | H | -0.81867800 | -7.10169900 | 1.71707600  |
| H | 7.20852400  | -3.14671800 | 0.24680200  | C | -0.88424100 | -4.97567400 | 2.04410800  |
| C | 2.93538600  | -4.71147700 | 2.54022100  | C | -0.75650200 | -3.71371100 | 1.44218000  |
| H | 3.69216900  | -5.50132100 | 2.59218700  | H | -0.82207100 | -2.80832000 | 2.04408000  |
| H | 2.01737600  | -5.14559700 | 2.12852800  | C | -0.24781400 | -7.28823200 | -0.94053500 |
| H | 2.70754200  | -4.39699300 | 3.56620400  | H | -0.34712900 | -7.08170800 | -2.01114800 |
| C | 2.91875900  | 1.36208400  | -0.34259100 | H | -0.97762200 | -8.06231700 | -0.67611300 |
| C | 3.85716100  | 2.30561300  | 0.10462600  | H | 0.75000400  | -7.71871900 | -0.78132100 |
| H | 4.08191300  | 2.38369600  | 1.16375600  | C | -1.20760100 | -5.08694300 | 3.51764000  |
| C | 4.51420700  | 3.15099800  | -0.79584400 | H | -0.83195300 | -6.02351700 | 3.94449100  |
| C | 4.22418700  | 3.02829900  | -2.16179800 | H | -2.29251100 | -5.06406200 | 3.68853800  |
| H | 4.73816100  | 3.67398300  | -2.87262500 | H | -0.77569500 | -4.25352800 | 4.08131300  |
| C | 3.29427400  | 2.09778700  | -2.63618400 | C | 0.58875200  | -2.09591600 | -2.17632300 |
| C | 2.64056700  | 1.27145200  | -1.71197600 | C | 1.80865000  | -2.79028300 | -2.08312000 |
| H | 1.89978800  | 0.56043000  | -2.06312500 | H | 2.10316300  | -3.24527100 | -1.14337900 |
| C | 5.50330000  | 4.18570400  | -0.30712700 | C | 2.64885800  | -2.93018400 | -3.19129200 |
| H | 5.88105000  | 3.93748200  | 0.69009400  | C | 2.26640900  | -2.34433000 | -4.40645500 |
| H | 5.04181200  | 5.18021100  | -0.24341500 | H | 2.91172700  | -2.45460900 | -5.27687600 |
| H | 6.36181200  | 4.27171600  | -0.98321600 | C | 1.06966900  | -1.63632300 | -4.52870300 |
| C | 2.98083400  | 1.98748800  | -4.11117100 | C | 0.23808800  | -1.52331600 | -3.40451800 |
| H | 3.03598100  | 0.94691000  | -4.45095400 | H | -0.70213500 | -0.99380400 | -3.50889300 |
| H | 3.67506700  | 2.58159900  | -4.71481700 | C | 0.66160700  | -1.00706100 | -5.84224800 |
| C | -2.20977300 | -1.86730800 | -1.46126300 | H | 0.71740800  | 0.08813500  | -5.79516900 |
| C | -2.65514500 | -0.66551900 | -2.03905000 | H | -0.37150200 | -1.26425700 | -6.10430800 |
| H | -2.02408900 | 0.21666600  | -1.99176400 | H | 1.30877100  | -1.33646100 | -6.66185000 |
| C | -3.91295100 | -0.57477100 | -2.64449600 | C | 3.93553300  | -3.71845300 | -3.09873800 |

|    |              |             |             |
|----|--------------|-------------|-------------|
| H  | 3.91476200   | -4.59340000 | -3.76151300 |
| H  | 4.11281500   | -4.07196700 | -2.07915800 |
| H  | 4.79794700   | -3.11023100 | -3.39953900 |
| Ru | -0.26837600  | 0.06485100  | 0.54216300  |
| P  | 2.02780600   | 0.21352800  | 0.80511000  |
| P  | -0.51008800  | -1.90856200 | -0.68177800 |
| H  | 1.96408300   | 2.34145400  | -4.32567200 |
| H  | -2.38628700  | -0.40823900 | 2.61184200  |
| C  | -0.51883900  | 2.49483100  | -0.35174200 |
| C  | -0.67613700  | 3.89299800  | -0.91680700 |
| C  | 0.30929800   | 4.89487900  | -0.27368000 |
| C  | 0.19673000   | 6.28166400  | -0.86865200 |
| C  | 0.99188400   | 6.66008300  | -1.95956600 |
| C  | 0.87059400   | 7.92731800  | -2.53223300 |
| C  | -0.05214600  | 8.84226600  | -2.02101400 |
| C  | -0.84939300  | 8.47978200  | -0.93321800 |
| C  | -0.72361800  | 7.21138100  | -0.36439300 |
| H  | -0.53356900  | 3.84762900  | -2.00055700 |
| H  | -1.70607500  | 4.22929900  | -0.73551300 |
| H  | 0.11776600   | 4.92376600  | 0.80406700  |
| H  | 1.71682200   | 5.95286500  | -2.35780900 |
| H  | 1.50001900   | 8.20173700  | -3.37520400 |
| H  | -0.14606600  | 9.83062000  | -2.46330200 |
| H  | -1.56634500  | 9.18697900  | -0.52347900 |
| H  | -1.34377300  | 6.93871300  | 0.48733600  |
| O  | -0.42970800  | 1.49629900  | -1.13535900 |
| O  | -0.45782600  | 2.31592800  | 0.90704100  |
| H  | 1.33060200   | 4.51705700  | -0.40316900 |
| C  | -3.03072000  | 0.01849500  | 1.82302900  |
| C  | -4.48803600  | 0.25781700  | 2.09135700  |
| C  | -5.26852200  | 0.89996100  | 0.93292600  |
| C  | -6.73810100  | 1.06605700  | 1.25691300  |
| C  | -7.20476400  | 2.20966100  | 1.92011800  |
| C  | -8.55351500  | 2.34722500  | 2.25190300  |
| C  | -9.46202400  | 1.33872900  | 1.92381600  |
| C  | -9.01156700  | 0.19573300  | 1.26015400  |
| C  | -7.66162600  | 0.06331100  | 0.93025400  |
| H  | 0.14725200   | -0.32161500 | 3.01677200  |
| H  | -4.92596300  | -0.71355700 | 2.37128400  |
| H  | -4.55812400  | 0.86542500  | 3.00701900  |
| H  | -4.81802300  | 1.87245700  | 0.70280200  |
| H  | -6.50383700  | 3.00279400  | 2.17329600  |
| H  | -8.89550000  | 3.24394800  | 2.76241700  |
| H  | -10.51308800 | 1.44511200  | 2.17874600  |

|   |             |             |            |
|---|-------------|-------------|------------|
| H | -9.71232000 | -0.59167100 | 0.99427900 |
| H | -7.31762700 | -0.82593700 | 0.40585000 |
| O | -2.50898500 | 0.27169200  | 0.74032900 |
| O | -0.37631600 | -0.87150500 | 2.41257200 |
| H | -5.14149900 | 0.28129300  | 0.03823000 |

### Int15

|   |             |             |             |
|---|-------------|-------------|-------------|
| C | -0.95718100 | -2.77861500 | -1.38647100 |
| C | -1.55326100 | -2.31355500 | -2.57150500 |
| H | -1.82066500 | -1.26484800 | -2.65977000 |
| C | -1.84302700 | -3.18819300 | -3.62577100 |
| C | -1.52649500 | -4.54411000 | -3.47864700 |
| H | -1.75118600 | -5.23366600 | -4.29143700 |
| C | -0.93544300 | -5.03782000 | -2.31047200 |
| C | -0.65948700 | -4.14348400 | -1.26779400 |
| H | -0.20968300 | -4.52236100 | -0.35540000 |
| C | -2.46895400 | -2.67476700 | -4.90299700 |
| H | -1.71856300 | -2.56593200 | -5.69753800 |
| H | -2.93074100 | -1.69403800 | -4.75290500 |
| H | -3.23744800 | -3.36082700 | -5.27783700 |
| C | -0.58342300 | -6.50310400 | -2.18130000 |
| H | -0.56915900 | -6.82074600 | -1.13332700 |
| H | 0.41135900  | -6.71250100 | -2.59769100 |
| H | -1.29795000 | -7.13669500 | -2.71839000 |
| C | 0.52324400  | -2.49880000 | 1.06615200  |
| C | 0.15833900  | -2.91864100 | 2.34929000  |
| H | -0.82752800 | -2.68108400 | 2.73666100  |
| C | 1.04529800  | -3.65116300 | 3.15255200  |
| C | 2.30259600  | -3.97864000 | 2.63848700  |
| H | 2.99064600  | -4.56366400 | 3.24734600  |
| C | 2.69890000  | -3.57306000 | 1.35573500  |
| C | 1.80414300  | -2.82228000 | 0.58973200  |
| H | 2.10932900  | -2.49447400 | -0.40011300 |
| C | 0.64682000  | -4.06125300 | 4.55234100  |
| H | 1.22666200  | -4.92327200 | 4.89927300  |
| H | -0.41569100 | -4.32316100 | 4.60633800  |
| H | 0.81484200  | -3.24416800 | 5.26676500  |
| C | 4.05294300  | -3.96054900 | 0.80459400  |
| H | 4.82715300  | -3.92758900 | 1.57968500  |
| H | 4.35850600  | -3.29414100 | -0.00863400 |
| H | 4.04205100  | -4.98358100 | 0.40456600  |
| C | -2.18068900 | -1.46799600 | 0.90864800  |
| C | -3.24725400 | -2.35265200 | 0.69420500  |
| H | -3.16141000 | -3.12889900 | -0.05995400 |

|   |             |             |             |    |             |             |             |
|---|-------------|-------------|-------------|----|-------------|-------------|-------------|
| C | -4.42969800 | -2.25100900 | 1.43593300  | H  | 3.58731800  | -1.78547100 | -4.84431100 |
| C | -4.52385500 | -1.25142000 | 2.41362800  | H  | 3.02290400  | -2.85634800 | -3.56099000 |
| H | -5.43605400 | -1.17062600 | 3.00338800  | H  | 4.72226200  | -2.89469200 | -4.06716900 |
| C | -3.47557500 | -0.35566400 | 2.65357500  | C  | 2.25175100  | 0.90633400  | 1.45471800  |
| C | -2.31036800 | -0.46801200 | 1.88292600  | C  | 3.30445500  | 0.15839300  | 1.98600300  |
| H | -1.49754900 | 0.23581000  | 2.03614500  | H  | 4.06225500  | -0.25716200 | 1.32876500  |
| C | -5.58872700 | -3.18716100 | 1.17645400  | C  | 3.40534000  | -0.06451400 | 3.36879300  |
| H | -6.35411700 | -2.70880600 | 0.55105600  | C  | 2.43816000  | 0.49073300  | 4.20849500  |
| H | -6.07747100 | -3.49039400 | 2.10947600  | H  | 2.51834000  | 0.33766900  | 5.28386200  |
| H | -5.26084700 | -4.09256200 | 0.65568000  | C  | 1.36681500  | 1.24283600  | 3.70330200  |
| C | -3.58721300 | 0.69969400  | 3.73105500  | C  | 1.28088000  | 1.43705700  | 2.32312500  |
| H | -3.09787700 | 0.37510300  | 4.65940800  | H  | 0.45554500  | 2.01447100  | 1.91258400  |
| H | -4.63285800 | 0.91715600  | 3.97330700  | C  | 0.32630400  | 1.81818700  | 4.63754400  |
| C | 2.48881900  | 3.07110400  | -0.39970200 | H  | -0.27098300 | 2.59050900  | 4.14256200  |
| C | 2.07987400  | 3.86482800  | -1.47550400 | H  | 0.78827800  | 2.26563500  | 5.52552500  |
| H | 1.43585800  | 3.43200600  | -2.23529700 | H  | -0.36531500 | 1.04190800  | 4.99136200  |
| C | 2.46777900  | 5.20861200  | -1.57525900 | C  | 4.52954500  | -0.90614800 | 3.92742700  |
| C | 3.27708900  | 5.74883300  | -0.57290900 | H  | 5.47118500  | -0.72469600 | 3.39669200  |
| H | 3.58401500  | 6.79164700  | -0.64150600 | H  | 4.30041100  | -1.97526500 | 3.82760600  |
| C | 3.69725900  | 4.98336300  | 0.52310700  | H  | 4.69502800  | -0.70149200 | 4.99060400  |
| C | 3.29719600  | 3.64589100  | 0.59683000  | Ru | 0.01059500  | 0.65220300  | -1.22423900 |
| H | 3.61407400  | 3.05145000  | 1.44836600  | P  | -0.59972800 | -1.53254600 | -0.05245100 |
| C | 1.99084200  | 6.05501400  | -2.73404200 | P  | 2.02424600  | 1.26658400  | -0.34584900 |
| H | 2.06129100  | 5.51091100  | -3.68265000 | H  | -3.10793800 | 1.63588200  | 3.42475100  |
| H | 2.57630400  | 6.97593600  | -2.82620700 | H  | 0.20935000  | 1.89745600  | -2.23141400 |
| H | 0.93903800  | 6.34318100  | -2.60677400 | C  | -2.31491900 | 1.59712000  | -0.82847100 |
| C | 4.55167500  | 5.59956900  | 1.60840900  | C  | -3.61810300 | 2.29506300  | -0.50646900 |
| H | 3.98610900  | 6.33844500  | 2.19118200  | C  | -4.85697500 | 1.48282200  | -0.93163300 |
| H | 5.42110000  | 6.12041900  | 1.18881500  | C  | -6.15253900 | 2.20235600  | -0.62252100 |
| H | 4.91862300  | 4.84086400  | 2.30710400  | C  | -6.84130100 | 1.96100800  | 0.57422600  |
| C | 3.46331000  | 0.47623700  | -1.20938200 | C  | -8.02113200 | 2.64407200  | 0.87537900  |
| C | 4.79655800  | 0.87803700  | -1.03574600 | C  | -8.53437300 | 3.58477800  | -0.01958600 |
| H | 5.03015600  | 1.69057400  | -0.35355600 | C  | -7.85987900 | 3.83414300  | -1.21692700 |
| C | 5.83490900  | 0.25969700  | -1.73901800 | C  | -6.68154700 | 3.14757300  | -1.51320100 |
| C | 5.51648900  | -0.76389900 | -2.64365600 | H  | -3.63814800 | 2.51625500  | 0.56576200  |
| H | 6.31803700  | -1.24489900 | -3.20233200 | H  | -3.61222000 | 3.26613400  | -1.02162200 |
| C | 4.19755900  | -1.17257400 | -2.86072800 | H  | -4.78246000 | 1.27378000  | -2.00388400 |
| C | 3.18182900  | -0.54282500 | -2.12683600 | H  | -6.44835900 | 1.22400800  | 1.27170600  |
| H | 2.14914700  | -0.85621200 | -2.28448700 | H  | -8.54194600 | 2.43845800  | 1.80742700  |
| C | 7.27305300  | 0.67729200  | -1.52971900 | H  | -9.45418500 | 4.11572200  | 0.21143600  |
| H | 7.33924200  | 1.59952400  | -0.94403800 | H  | -8.25457500 | 4.55987900  | -1.92367500 |
| H | 7.78359900  | 0.84782300  | -2.48488900 | H  | -6.16590700 | 3.34190100  | -2.45165700 |
| H | 7.84015900  | -0.09650800 | -0.99569700 | O  | -1.27294400 | 1.86384500  | -0.12378900 |
| C | 3.86681200  | -2.23627700 | -3.88284400 | O  | -2.20969500 | 0.77418900  | -1.77991700 |

|              |             |             |             |   |             |             |             |
|--------------|-------------|-------------|-------------|---|-------------|-------------|-------------|
| H            | -4.83519300 | 0.51368400  | -0.42073000 | C | -3.83346000 | -0.02423900 | 2.09432900  |
|              |             |             |             | H | -3.43231700 | -0.94899100 | 1.68716000  |
| <b>Int16</b> |             |             |             | C | -5.40216500 | 3.63624400  | 3.74491200  |
| C            | -2.18843700 | 2.96183500  | -0.41085500 | H | -5.69555300 | 4.34424500  | 2.96110200  |
| C            | -1.13432100 | 3.85885300  | -0.22544800 | H | -4.64248900 | 4.13544700  | 4.36047400  |
| H            | -0.24364200 | 3.53068300  | 0.29710700  | H | -6.27480200 | 3.45458600  | 4.38076000  |
| C            | -1.20536900 | 5.17030500  | -0.72483000 | C | -5.21481600 | -1.42173200 | 3.69224800  |
| C            | -2.35473500 | 5.56633000  | -1.40821300 | H | -6.30605400 | -1.47273400 | 3.78712900  |
| H            | -2.41897300 | 6.58173300  | -1.79708300 | H | -4.79681700 | -1.58976600 | 4.69341500  |
| C            | -3.42989500 | 4.68686200  | -1.61345600 | C | 1.31657100  | -2.72940100 | 1.51477200  |
| C            | -3.33119900 | 3.38831900  | -1.11378600 | C | 1.97749800  | -2.13084900 | 2.59665200  |
| H            | -4.15454800 | 2.69922000  | -1.27838300 | H | 2.12889900  | -1.05619400 | 2.60248700  |
| C            | -0.04738900 | 6.12053600  | -0.51921400 | C | 2.46480700  | -2.90331400 | 3.66036000  |
| H            | 0.87145500  | 5.72880600  | -0.97282000 | C | 2.26888200  | -4.28719400 | 3.63068800  |
| H            | 0.16145400  | 6.27038000  | 0.54738400  | H | 2.63575700  | -4.89363700 | 4.45777200  |
| H            | -0.24935600 | 7.10129300  | -0.96229100 | C | 1.61064600  | -4.91361500 | 2.56459600  |
| C            | -4.65860300 | 5.14066100  | -2.36939100 | C | 1.14254200  | -4.12285700 | 1.50965700  |
| H            | -5.09489800 | 6.04328600  | -1.92344300 | H | 0.63275000  | -4.60270300 | 0.68001900  |
| H            | -5.43062000 | 4.36469800  | -2.37766100 | C | 3.20437400  | -2.24562300 | 4.80377500  |
| H            | -4.41986000 | 5.38260600  | -3.41311900 | H | 2.76675400  | -1.27343700 | 5.05466300  |
| C            | -2.86381200 | 0.30925700  | -1.15737400 | H | 4.25671500  | -2.06705100 | 4.54522900  |
| C            | -4.21071200 | -0.08126600 | -1.20300500 | H | 3.18968200  | -2.86985800 | 5.70370200  |
| H            | -4.85936300 | 0.10626500  | -0.35299900 | C | 1.39008500  | -6.40991500 | 2.56833600  |
| C            | -4.74433000 | -0.70061900 | -2.33945200 | H | 2.28606800  | -6.94735200 | 2.90049100  |
| C            | -3.90687100 | -0.91830000 | -3.44068500 | H | 1.12545300  | -6.77759200 | 1.57159100  |
| H            | -4.31440000 | -1.39271300 | -4.33210400 | H | 0.57543600  | -6.69163100 | 3.24893500  |
| C            | -2.56171200 | -0.53763800 | -3.42646800 | C | 2.14208400  | -1.59296600 | -1.02828400 |
| C            | -2.05413000 | 0.07451400  | -2.27393300 | C | 3.25439200  | -2.44007100 | -0.90235800 |
| H            | -1.01192600 | 0.38384500  | -2.25189800 | H | 3.29560500  | -3.15891300 | -0.08997200 |
| C            | -6.19368300 | -1.13209600 | -2.37910800 | C | 4.32013000  | -2.37259000 | -1.80556600 |
| H            | -6.67440500 | -0.83859700 | -3.31982800 | C | 4.25804000  | -1.43801000 | -2.84846800 |
| H            | -6.76536200 | -0.68999400 | -1.55667300 | H | 5.08685200  | -1.37158000 | -3.55172000 |
| H            | -6.28890200 | -2.22315200 | -2.29769600 | C | 3.16313100  | -0.58274900 | -3.00390500 |
| C            | -1.66438800 | -0.79239100 | -4.61554700 | C | 2.11275000  | -0.66598600 | -2.07872000 |
| H            | -1.09843400 | 0.10553300  | -4.89076400 | H | 1.28083900  | 0.02583600  | -2.16228200 |
| H            | -2.23971400 | -1.10931500 | -5.49164900 | C | 5.50963900  | -3.29725800 | -1.67283000 |
| H            | -0.93397800 | -1.57982200 | -4.39051400 | H | 5.52372400  | -3.79180700 | -0.69648700 |
| C            | -3.41205300 | 1.20872500  | 1.56658500  | H | 6.45482900  | -2.75418800 | -1.79029600 |
| C            | -3.93491100 | 2.38549300  | 2.10868200  | H | 5.49331500  | -4.08238000 | -2.44051100 |
| H            | -3.61730500 | 3.34756400  | 1.71883400  | C | 3.10351400  | 0.41522200  | -4.13847200 |
| C            | -4.86865100 | 2.34955700  | 3.15670300  | H | 2.40469200  | 0.08918400  | -4.92037400 |
| C            | -5.27922800 | 1.10873300  | 3.64613300  | H | 4.08367600  | 0.54706200  | -4.60824600 |
| H            | -6.01014700 | 1.07054200  | 4.45237000  | H | 2.75999900  | 1.39488700  | -3.78763800 |
| C            | -4.76947600 | -0.09141500 | 3.12791400  | C | -0.47577300 | -2.78245200 | -0.72519000 |

|    |             |             |             |
|----|-------------|-------------|-------------|
| C  | -0.17066800 | -3.44035400 | -1.92491800 |
| H  | 0.79213900  | -3.27861300 | -2.39954500 |
| C  | -1.08190800 | -4.32361600 | -2.51796800 |
| C  | -2.30778000 | -4.55016600 | -1.88172600 |
| H  | -3.01891400 | -5.24304900 | -2.32876300 |
| C  | -2.64163800 | -3.90969600 | -0.68347300 |
| C  | -1.71519300 | -3.02562000 | -0.11973600 |
| H  | -1.96001600 | -2.52988000 | 0.81679600  |
| C  | -3.98180000 | -4.14253200 | -0.02408100 |
| H  | -3.88604900 | -4.21929500 | 1.06536900  |
| H  | -4.45341800 | -5.06228800 | -0.38585600 |
| H  | -4.66954100 | -3.31250800 | -0.23245300 |
| C  | -0.75282600 | -5.01252300 | -3.82353700 |
| H  | -1.22402800 | -4.50069900 | -4.67343900 |
| H  | -1.11132300 | -6.04817600 | -3.83276400 |
| H  | 0.32634500  | -5.02621200 | -4.00820400 |
| Ru | -0.02671200 | 0.63774100  | 1.08304300  |
| P  | -2.09488400 | 1.22999300  | 0.26166900  |
| P  | 0.70318600  | -1.63995000 | 0.13788000  |
| H  | -4.89304300 | -2.25390700 | 3.05760700  |
| C  | 2.30897100  | 1.52934000  | 0.49852300  |
| C  | 3.64602800  | 2.09129100  | 0.06001700  |
| C  | 4.64242800  | 2.29823800  | 1.21630900  |
| C  | 5.98911100  | 2.79271900  | 0.73238500  |
| C  | 6.98688800  | 1.88847900  | 0.34110200  |
| C  | 8.21829300  | 2.33881000  | -0.13722500 |
| C  | 8.47509100  | 3.70822700  | -0.23260900 |
| C  | 7.49172600  | 4.62045100  | 0.15511300  |
| C  | 6.26185800  | 4.16404100  | 0.63266900  |
| H  | 4.06725600  | 1.39101900  | -0.67462200 |
| H  | 3.46470500  | 3.02738500  | -0.47979300 |
| H  | 4.21628500  | 3.01063700  | 1.93292700  |
| H  | 6.79523400  | 0.81996400  | 0.41700600  |
| H  | 8.97961000  | 1.62010900  | -0.43044800 |
| H  | 9.43471300  | 4.06113800  | -0.60125300 |
| H  | 7.68338600  | 5.68866700  | 0.09057600  |
| H  | 5.50261200  | 4.88110300  | 0.93855500  |
| O  | 1.28052300  | 1.71331400  | -0.24052500 |
| O  | 2.19192100  | 0.85822400  | 1.56614400  |
| H  | 4.75456500  | 1.35013300  | 1.75192900  |
| H  | -0.23141100 | 2.04616700  | 1.84766500  |
| H  | -0.85725000 | -0.45861700 | 2.14960900  |
| H  | -0.68600300 | 0.26511300  | 2.61707000  |

**Int17**

|   |             |             |             |
|---|-------------|-------------|-------------|
| C | 1.54138000  | -2.38552700 | -2.63522900 |
| C | 0.38924100  | -2.07098400 | -3.35897100 |
| H | -0.41403300 | -1.53341800 | -2.86909300 |
| C | 0.26562100  | -2.42490500 | -4.71288600 |
| C | 1.31707500  | -3.10588200 | -5.32574400 |
| H | 1.23004100  | -3.38421300 | -6.37517600 |
| C | 2.48869800  | -3.43628400 | -4.62592300 |
| C | 2.58913200  | -3.06577200 | -3.28477200 |
| H | 3.49675400  | -3.30772200 | -2.73952700 |
| C | -0.98725400 | -2.06196500 | -5.47754000 |
| H | -1.13977400 | -0.97571500 | -5.49525700 |
| H | -1.87900400 | -2.50260300 | -5.01467800 |
| H | -0.94025100 | -2.41117700 | -6.51422200 |
| C | 3.61322600  | -4.17252200 | -5.31904200 |
| H | 3.28169000  | -5.14834200 | -5.69632200 |
| H | 4.45459000  | -4.34542900 | -4.64058200 |
| H | 3.99007800  | -3.60740900 | -6.18088100 |
| C | 3.49530700  | -1.45990100 | -0.80463800 |
| C | 4.51095700  | -2.29400800 | -0.31549500 |
| H | 4.26033200  | -3.25581300 | 0.12105400  |
| C | 5.85689900  | -1.91577500 | -0.39764400 |
| C | 6.17374700  | -0.68635900 | -0.98796600 |
| H | 7.21797200  | -0.38772900 | -1.06539200 |
| C | 5.18314700  | 0.16588100  | -1.48597800 |
| C | 3.84618100  | -0.23589700 | -1.38525500 |
| H | 3.06684300  | 0.40901400  | -1.78462500 |
| C | 6.94723000  | -2.81267000 | 0.14522900  |
| H | 7.81972700  | -2.83060600 | -0.51802300 |
| H | 6.59477300  | -3.84214100 | 0.26753400  |
| H | 7.29739100  | -2.46700400 | 1.12722800  |
| C | 5.53654400  | 1.49634900  | -2.10960500 |
| H | 5.04646400  | 1.62691600  | -3.08183300 |
| H | 6.61647200  | 1.59392900  | -2.26179900 |
| H | 5.21170900  | 2.32578900  | -1.46865200 |
| C | 1.64678200  | -3.55685100 | 0.03526500  |
| C | 1.23618500  | -4.73107800 | -0.60206400 |
| H | 0.98806000  | -4.71487100 | -1.65865500 |
| C | 1.13606400  | -5.94105600 | 0.10223400  |
| C | 1.46714800  | -5.95664700 | 1.45841900  |
| H | 1.40148300  | -6.89244000 | 2.01114400  |
| C | 1.87835200  | -4.79521100 | 2.12851100  |
| C | 1.95932100  | -3.60387500 | 1.40448100  |
| H | 2.27666500  | -2.69850600 | 1.91625800  |

|   |             |             |             |    |             |             |             |
|---|-------------|-------------|-------------|----|-------------|-------------|-------------|
| C | 0.66164100  | -7.19378200 | -0.59899600 | C  | 5.12779400  | 2.56224300  | 1.83915200  |
| H | 1.11331500  | -7.29304300 | -1.59263500 | C  | 5.57359100  | 1.44692800  | 2.55733500  |
| H | -0.42709800 | -7.17991000 | -0.74034400 | H  | 6.60041400  | 1.42316500  | 2.91872800  |
| H | 0.90682300  | -8.09253800 | -0.02358200 | C  | 4.73076100  | 0.36296100  | 2.82625200  |
| C | 2.19799300  | -4.83011000 | 3.60591400  | C  | 3.41274000  | 0.41175300  | 2.36016700  |
| H | 2.73589500  | -5.74501900 | 3.87941100  | H  | 2.74513500  | -0.41994500 | 2.57472700  |
| H | 1.28139600  | -4.80045500 | 4.20974200  | C  | 5.23044900  | -0.84414600 | 3.58658300  |
| C | 0.33778800  | 1.79694500  | 2.80026800  | H  | 4.51560600  | -1.15786000 | 4.35656400  |
| C | -0.94640500 | 1.29391200  | 3.04082300  | H  | 6.18694700  | -0.64072800 | 4.07923700  |
| H | -1.46036100 | 0.71777000  | 2.27852600  | H  | 5.37785100  | -1.69846000 | 2.91318900  |
| C | -1.58650000 | 1.51537500  | 4.27185600  | C  | 6.06332500  | 3.71300600  | 1.54269500  |
| C | -0.91048700 | 2.23870900  | 5.25730300  | H  | 6.67505100  | 3.51024000  | 0.65316600  |
| H | -1.39567600 | 2.40394500  | 6.21853400  | H  | 6.75409100  | 3.89375000  | 2.37400000  |
| C | 0.37661200  | 2.75298500  | 5.04599400  | H  | 5.51137000  | 4.63981600  | 1.35400300  |
| C | 0.98844200  | 2.52619800  | 3.81118700  | Ru | 0.07487400  | -0.47165900 | -0.09929700 |
| H | 1.98762300  | 2.91545300  | 3.63905800  | P  | 1.69685000  | -1.92352900 | -0.83989100 |
| C | -2.98453200 | 0.99328700  | 4.51412100  | P  | 1.14246400  | 1.49996800  | 1.15418100  |
| H | -3.14343000 | 0.03703200  | 4.00790500  | H  | 2.81265400  | -3.97416200 | 3.90376700  |
| H | -3.73628700 | 1.69477300  | 4.12621400  | C  | -1.33801600 | 1.23616300  | -1.43089100 |
| H | -3.18130900 | 0.86573900  | 5.58446800  | C  | -2.14242800 | 2.16094400  | -2.31841600 |
| C | 1.08687600  | 3.52187500  | 6.13773200  | C  | -3.07759300 | 3.10996800  | -1.54444500 |
| H | 0.48182700  | 4.36463300  | 6.49466300  | C  | -3.87034200 | 4.01004900  | -2.46840700 |
| H | 2.04375000  | 3.92121600  | 5.78651400  | C  | -3.33148400 | 5.22090200  | -2.92661300 |
| H | 1.29224400  | 2.88444900  | 7.00749000  | C  | -4.04683100 | 6.03946600  | -3.80195400 |
| C | 0.93752700  | 3.12365000  | 0.28241700  | C  | -5.31879200 | 5.65940000  | -4.23612000 |
| C | 0.29129100  | 4.22583800  | 0.86155400  | C  | -5.86773100 | 4.45673300  | -3.78720300 |
| H | -0.09673900 | 4.15284600  | 1.87223000  | C  | -5.14813500 | 3.64185700  | -2.91125800 |
| C | 0.13333700  | 5.42537700  | 0.15682500  | H  | -1.44125400 | 2.72077600  | -2.94562300 |
| C | 0.63600600  | 5.50782100  | -1.14860200 | H  | -2.73196700 | 1.53263700  | -3.00180400 |
| H | 0.51827500  | 6.43628900  | -1.70592000 | H  | -3.75529500 | 2.51227300  | -0.92623300 |
| C | 1.28199500  | 4.42551700  | -1.75659900 | H  | -2.34188100 | 5.52222700  | -2.58841300 |
| C | 1.41504600  | 3.23457000  | -1.03136200 | H  | -3.61315800 | 6.97679600  | -4.14184200 |
| H | 1.87802100  | 2.37603500  | -1.50777200 | H  | -5.87879700 | 6.29722000  | -4.91497400 |
| C | -0.54554900 | 6.61584500  | 0.79706200  | H  | -6.85935200 | 4.15437800  | -4.11452900 |
| H | -1.10970000 | 6.32173500  | 1.68756500  | H  | -5.58501300 | 2.70908700  | -2.56039000 |
| H | -1.24018300 | 7.10339000  | 0.10327200  | O  | -0.24646400 | 0.74332700  | -1.85428400 |
| H | 0.18691300  | 7.37356300  | 1.10596400  | O  | -1.74558700 | 0.92143300  | -0.26060200 |
| C | 1.83331000  | 4.53396700  | -3.16068700 | H  | -2.47434000 | 3.71385300  | -0.85694900 |
| H | 2.91045200  | 4.74879000  | -3.15057300 | H  | -0.84863000 | -1.58570800 | -0.82032600 |
| H | 1.34624000  | 5.33842300  | -3.72174700 | H  | 0.26644400  | -1.17539600 | 1.47813700  |
| H | 1.69482500  | 3.60005800  | -3.71647800 | H  | -0.43158000 | -1.55911700 | 1.12361700  |
| C | 2.93152900  | 1.51673900  | 1.64661800  | C  | -3.96231600 | -1.36935900 | 1.15678000  |
| C | 3.80003700  | 2.58732100  | 1.39283100  | C  | -5.17210600 | -2.28229300 | 1.23805300  |
| H | 3.44105900  | 3.45986500  | 0.85571100  | C  | -6.51457600 | -1.51369800 | 1.19464100  |

|   |              |             |             |   |             |             |             |
|---|--------------|-------------|-------------|---|-------------|-------------|-------------|
| C | -7.70738600  | -2.44194300 | 1.28300800  | C | -4.32109200 | 0.79741000  | 0.31058700  |
| C | -8.29694500  | -2.96569800 | 0.12415700  | H | -4.13287200 | -0.10946300 | -0.25630600 |
| C | -9.37358700  | -3.85055400 | 0.20342500  | C | -5.10652000 | 4.37487300  | 2.58504800  |
| C | -9.88083100  | -4.22733000 | 1.44862400  | H | -6.17313300 | 4.62723200  | 2.59018000  |
| C | -9.30445500  | -3.71146300 | 2.61124600  | H | -4.55717800 | 5.23505300  | 2.18825700  |
| C | -8.22806700  | -2.82709600 | 2.52619300  | H | -4.80124500 | 4.24660300  | 3.63251500  |
| H | -5.13342000  | -2.98176600 | 0.39341400  | C | -6.44253000 | -0.29087000 | 1.15104500  |
| H | -5.08877000  | -2.86335200 | 2.15999100  | H | -6.45436300 | -0.85823000 | 0.21418600  |
| H | -6.53999500  | -0.79652100 | 2.02475400  | H | -7.46571700 | 0.03779800  | 1.36446000  |
| H | -7.90987200  | -2.67278600 | -0.84972700 | H | -6.14538000 | -0.98711800 | 1.94605600  |
| H | -9.81903300  | -4.24200300 | -0.70769100 | C | -1.29535900 | 3.44422500  | -0.87341400 |
| H | -10.72103100 | -4.91372900 | 1.51238100  | C | -1.82493100 | 4.36547500  | -1.78999700 |
| H | -9.69545700  | -3.99427400 | 3.58535500  | H | -2.58309600 | 4.04933900  | -2.50023100 |
| H | -7.78672300  | -2.42560500 | 3.43624600  | C | -1.38199800 | 5.69144300  | -1.82005200 |
| O | -3.08920400  | -1.31978900 | 2.00668700  | C | -0.40081800 | 6.09249100  | -0.90271800 |
| O | -3.96705300  | -0.62227400 | 0.04697600  | H | -0.04730200 | 7.12254900  | -0.91890200 |
| H | -6.55432100  | -0.93105800 | 0.26862300  | C | 0.14184800  | 5.19999100  | 0.02509700  |
| H | -3.14312800  | -0.06380900 | 0.01847900  | C | -0.31522600 | 3.87462400  | 0.02590400  |

**Int18**

|   |             |             |             |   |             |             |             |
|---|-------------|-------------|-------------|---|-------------|-------------|-------------|
| C | -2.58664200 | 1.37912400  | -2.48459900 | H | 0.11570500  | 3.16267900  | 0.72317300  |
| C | -1.75790300 | 0.75349300  | -3.42710700 | C | -1.93022700 | 6.66947700  | -2.83507800 |
| H | -0.73716000 | 0.49736000  | -3.15248700 | H | -2.84179300 | 6.28734700  | -3.30583700 |
| C | -2.21918600 | 0.44424600  | -4.71370700 | H | -1.20375800 | 6.86371300  | -3.63537400 |
| C | -3.53502800 | 0.78183000  | -5.04773100 | H | -2.16732100 | 7.63620400  | -2.37498900 |
| H | -3.90982700 | 0.54032000  | -6.04153800 | C | 1.20902900  | 5.63384300  | 1.00413600  |
| C | -4.38648800 | 1.41777900  | -4.13366600 | H | 1.56951900  | 6.64413500  | 0.78403500  |
| C | -3.90201200 | 1.70469100  | -2.85230100 | H | 2.06523800  | 4.95012000  | 0.97154300  |
| H | -4.56490600 | 2.17329700  | -2.13095600 | C | -0.01374900 | -2.67550800 | 1.69734400  |
| C | -1.30104700 | -0.22716100 | -5.71015000 | C | 0.54241000  | -3.71329000 | 0.92802700  |
| H | -0.61078600 | -0.91330200 | -5.20810600 | H | 0.17744500  | -3.89069000 | -0.08005900 |
| H | -0.69366000 | 0.51246200  | -6.24929800 | C | 1.54926500  | -4.53541500 | 1.43785700  |
| H | -1.86596000 | -0.79305600 | -6.45889800 | C | 2.02132500  | -4.29345400 | 2.73710200  |
| C | -5.79618100 | 1.79551100  | -4.53107100 | H | 2.80722100  | -4.92752800 | 3.14498600  |
| H | -5.80719600 | 2.70677200  | -5.14415400 | C | 1.50398400  | -3.25980300 | 3.51891200  |
| H | -6.42241900 | 1.98452300  | -3.65311500 | C | 0.48106600  | -2.45894000 | 2.98647600  |
| H | -6.27212700 | 1.00508400  | -5.12297400 | H | 0.06504500  | -1.66395600 | 3.59890900  |
| C | -3.40963400 | 1.86066900  | 0.24929000  | C | 2.11545700  | -5.67423200 | 0.61884400  |
| C | -3.68050500 | 3.01878100  | 0.99091800  | H | 1.92092600  | -6.64429600 | 1.09438800  |
| H | -2.99599400 | 3.85989600  | 0.95038000  | H | 3.20341300  | -5.58757500 | 0.50534300  |
| C | -4.83622500 | 3.12531600  | 1.77639100  | H | 1.67381800  | -5.70325400 | -0.38258200 |
| C | -5.73050500 | 2.05072200  | 1.80320900  | C | 2.02150500  | -3.00183100 | 4.91656100  |
| H | -6.63847000 | 2.12800600  | 2.39966800  | H | 2.76445000  | -3.74961200 | 5.21258600  |
| C | -5.48629600 | 0.87744700  | 1.08020300  | H | 1.21022000  | -3.02426700 | 5.65466700  |
|   |             |             |             | H | 2.49474000  | -2.01441000 | 4.99171300  |
|   |             |             |             | C | -2.41291200 | -2.79176100 | 0.11714200  |



|    |             |             |             |                  |             |             |             |
|----|-------------|-------------|-------------|------------------|-------------|-------------|-------------|
| C  | -2.68514400 | -4.06639000 | 0.64290700  | C                | 7.64071900  | -2.22081300 | -2.01546700 |
| H  | -2.22074400 | -4.37604000 | 1.57491000  | C                | 6.31426700  | -2.16779900 | -1.58563800 |
| C  | -3.52055800 | -4.96562600 | -0.02723200 | H                | 3.04405400  | -2.13222000 | -3.52965000 |
| C  | -4.08332700 | -4.57344200 | -1.24951700 | H                | 3.64056100  | -0.90195400 | -2.39976400 |
| H  | -4.72711100 | -5.27071100 | -1.78438100 | H                | 3.86687500  | -2.69120700 | -0.61582400 |
| C  | -3.82367500 | -3.31953100 | -1.80944000 | H                | 5.00215200  | -4.59739100 | -3.56479900 |
| C  | -2.97766600 | -2.44197400 | -1.11560700 | H                | 7.35397900  | -4.69328000 | -4.33327800 |
| H  | -2.73712100 | -1.47882400 | -1.55772700 | H                | 9.05455600  | -3.17242700 | -3.34062000 |
| C  | -3.81352300 | -6.33269800 | 0.54992900  | H                | 8.37905900  | -1.55761300 | -1.57181800 |
| H  | -3.17193700 | -6.54845900 | 1.41027200  | H                | 6.01876700  | -1.46154800 | -0.81257300 |
| H  | -3.65652800 | -7.12358800 | -0.19342900 | O                | 0.68714000  | -1.93608100 | -2.56182300 |
| H  | -4.85595700 | -6.41087200 | 0.88586000  | O                | 1.60751600  | -1.18995800 | -0.68613300 |
| C  | -4.44546700 | -2.91304500 | -3.12641200 | H                | 3.41008100  | -3.90232000 | -1.80899000 |
| H  | -5.46033100 | -2.51863000 | -2.98039500 | H                | 0.65788900  | 1.19889000  | -1.35345400 |
| H  | -4.52565300 | -3.76531400 | -3.81064800 | H                | 0.19715000  | 0.87198800  | 0.86255300  |
| H  | -3.86165400 | -2.13016500 | -3.62015000 | H                | 1.78838100  | 1.68143100  | -0.47627400 |
| C  | -2.24325000 | -1.02995000 | 2.46173800  | C                | 3.64111400  | 1.47547300  | 0.14950900  |
| C  | -3.24771500 | -1.80739400 | 3.06152900  | C                | 4.80469700  | 2.29607000  | 0.67106500  |
| H  | -3.54854400 | -2.74760200 | 2.61162300  | C                | 6.10223400  | 1.49417800  | 0.85895900  |
| C  | -3.88182700 | -1.39130200 | 4.23522700  | C                | 7.22564200  | 2.34972300  | 1.40714000  |
| C  | -3.49613100 | -0.17282500 | 4.81257500  | C                | 8.08010300  | 3.05185200  | 0.54599700  |
| H  | -3.98372800 | 0.15905200  | 5.72825000  | C                | 9.09592600  | 3.86598800  | 1.04956700  |
| C  | -2.50792400 | 0.62732300  | 4.23700400  | C                | 9.27425700  | 3.99128800  | 2.42876700  |
| C  | -1.89024200 | 0.18569100  | 3.05712000  | C                | 8.43122800  | 3.29611600  | 3.29814200  |
| H  | -1.12956300 | 0.80196400  | 2.58589800  | C                | 7.41720600  | 2.48303700  | 2.78926600  |
| C  | -2.12027100 | 1.95551300  | 4.84589100  | H                | 4.95637700  | 3.14123000  | -0.01082500 |
| H  | -1.03555800 | 2.03078400  | 4.98996600  | H                | 4.48634500  | 2.74272200  | 1.62264600  |
| H  | -2.60007700 | 2.10739200  | 5.81849400  | H                | 5.90394500  | 0.65135300  | 1.52978400  |
| H  | -2.41565000 | 2.78577000  | 4.19175400  | H                | 7.95114000  | 2.95479200  | -0.53022600 |
| C  | -4.96557700 | -2.23122700 | 4.87459400  | H                | 9.75058600  | 4.39865000  | 0.36457800  |
| H  | -5.93845400 | -1.72336900 | 4.84384000  | H                | 10.06664700 | 4.62196900  | 2.82280700  |
| H  | -4.74508000 | -2.43486600 | 5.92985300  | H                | 8.56594400  | 3.38218200  | 4.37329800  |
| H  | -5.07801300 | -3.19367500 | 4.36519400  | H                | 6.76882700  | 1.93853700  | 3.47291100  |
| Ru | -0.25788600 | 0.12041900  | -0.44671400 | O                | 2.59643900  | 2.21627100  | -0.14747400 |
| P  | -1.87404700 | 1.67961400  | -0.79061200 | O                | 3.70012800  | 0.24618800  | 0.03530200  |
| P  | -1.29824100 | -1.55390600 | 0.94544200  | H                | 6.39511100  | 1.06158800  | -0.10490000 |
| H  | 0.83286800  | 5.63314100  | 2.03567000  | H                | 2.43509300  | -0.70864100 | -0.37822600 |
| C  | 1.70164800  | -1.67282800 | -1.95208000 |                  |             |             |             |
| C  | 3.11217100  | -1.86015000 | -2.47365400 | <b>II-cation</b> |             |             |             |
| C  | 3.90554800  | -2.93247600 | -1.68335200 | C                | 1.23861500  | 3.13382100  | 0.13182800  |
| C  | 5.34678100  | -3.01971000 | -2.13771900 | C                | 2.13870700  | 2.99229500  | 1.19948800  |
| C  | 5.74018700  | -3.92574800 | -3.13083000 | H                | 2.01672400  | 2.17654600  | 1.90880500  |
| C  | 7.06641200  | -3.98085500 | -3.56430600 | C                | 3.19333600  | 3.89378600  | 1.36640000  |
| C  | 8.02108300  | -3.12797600 | -3.00741000 | C                | 3.33273000  | 4.93411700  | 0.43597500  |

|   |             |            |             |   |             |             |             |
|---|-------------|------------|-------------|---|-------------|-------------|-------------|
| H | 4.15099100  | 5.64175900 | 0.55709300  | H | -3.94330500 | 1.37686300  | 4.89010300  |
| C | 2.45469600  | 5.09320800 | -0.64077000 | C | -1.64051400 | -2.14293400 | 1.80408000  |
| C | 1.39883400  | 4.18121300 | -0.78208500 | C | -0.54546600 | -2.05718800 | 2.68026600  |
| H | 0.70530500  | 4.29728400 | -1.61003700 | H | 0.38617600  | -1.61515900 | 2.34130300  |
| C | 4.15678000  | 3.76541300 | 2.52371500  | C | -0.64185800 | -2.54503900 | 3.98893900  |
| H | 4.06403700  | 4.61531100 | 3.21108400  | C | -1.85481100 | -3.11028700 | 4.40472900  |
| H | 5.19663400  | 3.74539200 | 2.17725200  | H | -1.94141100 | -3.48233500 | 5.42423400  |
| H | 3.97516300  | 2.85263800 | 3.09959700  | C | -2.95955000 | -3.21251400 | 3.55037700  |
| C | 2.65130900  | 6.20979700 | -1.64012600 | C | -2.84064800 | -2.71910400 | 2.24449900  |
| H | 1.72903400  | 6.42577400 | -2.18858200 | H | -3.69239000 | -2.78419300 | 1.57488200  |
| H | 3.41916700  | 5.94623900 | -2.37894400 | C | 0.53702800  | -2.47358300 | 4.93229000  |
| H | 2.97824100  | 7.13263700 | -1.14950100 | H | 0.96583800  | -3.46899900 | 5.10430100  |
| C | -0.93623000 | 2.07409100 | -1.61919300 | H | 0.24319600  | -2.07795000 | 5.91116200  |
| C | -2.31358000 | 2.29331900 | -1.80359000 | H | 1.33125700  | -1.83593400 | 4.53254000  |
| H | -2.93266300 | 2.56903000 | -0.95605000 | C | -4.24168900 | -3.86081500 | 4.01995300  |
| C | -2.89098900 | 2.16919400 | -3.06744800 | H | -4.47173300 | -3.58964600 | 5.05587200  |
| C | -2.07149500 | 1.80594900 | -4.15185200 | H | -4.16599500 | -4.95523600 | 3.98207000  |
| H | -2.52021300 | 1.71258700 | -5.13879600 | H | -5.09173300 | -3.56940900 | 3.39526100  |
| C | -0.70249600 | 1.58003800 | -4.00862500 | C | -0.57518200 | -2.81685200 | -0.86971600 |
| C | -0.13419200 | 1.71144500 | -2.72700200 | C | -0.03040900 | -3.96682100 | -0.27200700 |
| H | 0.94208100  | 1.61103200 | -2.61387200 | H | -0.25171700 | -4.19029500 | 0.76668900  |
| C | -4.37074600 | 2.39016000 | -3.26996400 | C | 0.78595200  | -4.83173800 | -1.00203300 |
| H | -4.57987400 | 2.82975300 | -4.25062200 | C | 1.07806300  | -4.51549800 | -2.34084500 |
| H | -4.78538800 | 3.05272100 | -2.50380700 | H | 1.71781900  | -5.18615100 | -2.91110000 |
| H | -4.91404900 | 1.43807100 | -3.21232700 | C | 0.56760700  | -3.37690000 | -2.96449300 |
| C | 0.16974100  | 1.25321400 | -5.19805300 | C | -0.26916200 | -2.52766100 | -2.21718200 |
| H | 0.71981200  | 2.14073900 | -5.53621500 | H | -0.73330600 | -1.67848600 | -2.71542300 |
| H | -0.42442500 | 0.89380600 | -6.04360500 | C | 1.33548400  | -6.09425300 | -0.38094100 |
| H | 0.91401400  | 0.48848000 | -4.95108600 | H | 1.15665100  | -6.12186100 | 0.69784000  |
| C | -1.31889200 | 2.49166700 | 1.31697900  | H | 2.41470200  | -6.18372500 | -0.54928000 |
| C | -1.80397500 | 3.81099900 | 1.29667200  | H | 0.86692800  | -6.98410800 | -0.81981700 |
| H | -1.48932300 | 4.49667500 | 0.51412500  | C | 0.90557400  | -3.05256700 | -4.40074900 |
| C | -2.68866100 | 4.25848000 | 2.28084900  | H | 0.03464900  | -2.66415300 | -4.94024400 |
| C | -3.06281000 | 3.36460000 | 3.29689900  | H | 1.26863000  | -3.93548000 | -4.93505400 |
| H | -3.74882900 | 3.70622500 | 4.06995400  | H | 1.69184400  | -2.28845700 | -4.45608000 |
| C | -2.57350000 | 2.05668600 | 3.35710000  | C | -3.16037000 | -1.37795900 | -0.56249200 |
| C | -1.69824000 | 1.62535700 | 2.34742600  | C | -3.66475200 | -2.26111200 | -1.52342200 |
| H | -1.30676800 | 0.61349900 | 2.37948900  | H | -3.03834600 | -3.05665700 | -1.91538900 |
| C | -3.22766600 | 5.67007500 | 2.26454100  | C | -4.98477700 | -2.14078700 | -1.98549700 |
| H | -2.93909600 | 6.21355700 | 3.17216100  | C | -5.78541400 | -1.12344700 | -1.45850200 |
| H | -4.32338200 | 5.67776500 | 2.22039900  | H | -6.81273600 | -1.02769300 | -1.80558400 |
| H | -2.85282900 | 6.23338500 | 1.40488300  | C | -5.30858300 | -0.22907200 | -0.48686900 |
| C | -2.95128900 | 1.13593900 | 4.49461300  | C | -3.98699100 | -0.36075900 | -0.05426600 |
| H | -2.95065800 | 0.08687400 | 4.18234000  | H | -3.60652800 | 0.32641100  | 0.69695100  |

|                   |             |             |             |   |             |             |             |
|-------------------|-------------|-------------|-------------|---|-------------|-------------|-------------|
| C                 | -6.21093100 | 0.84392100  | 0.07855900  | H | -1.36936900 | 5.05263800  | 1.44908200  |
| H                 | -5.68692200 | 1.46165500  | 0.81448700  | H | -0.92336900 | 6.61437500  | 0.73260200  |
| H                 | -7.08563800 | 0.40491800  | 0.57349100  | H | -0.25235000 | 6.13192500  | 2.29037200  |
| H                 | -6.58936400 | 1.50562700  | -0.70981400 | C | 3.83604900  | 6.16072400  | -1.19591900 |
| C                 | -5.53334600 | -3.11644800 | -3.00135700 | H | 3.58341300  | 6.42144700  | -2.23212500 |
| H                 | -5.89267100 | -4.03229400 | -2.51432200 | H | 4.80143000  | 5.64484800  | -1.21558200 |
| H                 | -4.76838800 | -3.41436000 | -3.72618500 | H | 3.96330700  | 7.09967800  | -0.64761500 |
| H                 | -6.37634200 | -2.68863200 | -3.55279300 | C | 2.49573100  | 0.97714400  | 1.68845400  |
| Ru                | 0.32521400  | -0.17473200 | -0.54964300 | C | 3.68304500  | 1.58508000  | 2.13777800  |
| P                 | -0.14594600 | 1.94399200  | 0.02599700  | H | 4.29345400  | 2.16317400  | 1.44985200  |
| P                 | -1.45110900 | -1.51624500 | 0.09058800  | C | 4.08877700  | 1.47035900  | 3.46795300  |
| H                 | -2.23932200 | 1.22935600  | 5.32508900  | C | 3.27337500  | 0.74834500  | 4.35465800  |
| C                 | 2.75827200  | -0.34970200 | 0.06965000  | H | 3.57877000  | 0.65674100  | 5.39541100  |
| O                 | 1.78669600  | -0.75561800 | 0.81756200  | C | 2.07854200  | 0.15602100  | 3.94448100  |
| O                 | 2.45212400  | 0.20422500  | -1.02897100 | C | 1.70172900  | 0.27721400  | 2.59713700  |
| C                 | 4.18436100  | -0.53099600 | 0.51293900  | H | 0.77794300  | -0.17728400 | 2.26057700  |
| H                 | 4.19693100  | -1.13351800 | 1.42590400  | C | 5.36941200  | 2.10978200  | 3.95313500  |
| H                 | 4.57668200  | 0.46250500  | 0.76785800  | H | 5.17906800  | 2.79965000  | 4.78380300  |
| C                 | 5.07639100  | -1.16083700 | -0.58367800 | H | 5.86346200  | 2.67394100  | 3.15627200  |
| H                 | 4.68309600  | -2.15478400 | -0.83171000 | H | 6.07757000  | 1.35578100  | 4.31854700  |
| H                 | 4.99746200  | -0.55027200 | -1.48899000 | C | 1.19430900  | -0.58141200 | 4.92325000  |
| C                 | 6.52118300  | -1.26981500 | -0.14382900 | H | 0.32975300  | 0.02928400  | 5.21493900  |
| C                 | 6.96759800  | -2.38187100 | 0.58288600  | H | 1.73737100  | -0.83647800 | 5.83853700  |
| C                 | 7.43375700  | -0.24472600 | -0.42682900 | H | 0.80552200  | -1.50779000 | 4.48651100  |
| C                 | 8.29066200  | -2.46780800 | 1.01854600  | C | 3.35784400  | 0.84730700  | -1.14097600 |
| H                 | 6.27424700  | -3.19140100 | 0.80312300  | C | 3.26535800  | 1.22543100  | -2.49579600 |
| C                 | 8.75803100  | -0.32631900 | 0.00689400  | H | 2.39661800  | 1.78023800  | -2.84389600 |
| H                 | 7.10594700  | 0.62058200  | -0.99960200 | C | 4.29839800  | 0.94476000  | -3.40140500 |
| C                 | 9.18986100  | -1.43843000 | 0.73236100  | C | 5.43101300  | 0.27012400  | -2.92937400 |
| H                 | 8.62075900  | -3.34030400 | 1.57591500  | H | 6.24297300  | 0.05254500  | -3.62090400 |
| H                 | 9.45376200  | 0.47481900  | -0.22772800 | C | 5.55396300  | -0.11931600 | -1.59059300 |
| H                 | 10.22128000 | -1.50554200 | 1.06686600  | C | 4.50267000  | 0.16566200  | -0.70601800 |
| <b>H-cation-w</b> |             |             |             | H | 4.59312000  | -0.13052000 | 0.33372300  |
| C                 | 1.84355800  | 3.09572500  | -0.07571100 | C | 4.20960100  | 1.39282300  | -4.84209100 |
| C                 | 0.73349000  | 3.70779200  | 0.53801100  | H | 4.83318100  | 2.27914200  | -5.01516300 |
| H                 | -0.04418100 | 3.09376400  | 0.98423100  | H | 3.18381200  | 1.65300700  | -5.12087400 |
| C                 | 0.62615600  | 5.10344500  | 0.60491200  | H | 4.56257900  | 0.61360600  | -5.52633600 |
| C                 | 1.64565300  | 5.88074000  | 0.03887500  | C | 6.80363900  | -0.82376500 | -1.11385200 |
| H                 | 1.57153200  | 6.96563700  | 0.08425500  | H | 7.70258900  | -0.26328000 | -1.39489600 |
| C                 | 2.76004600  | 5.30029000  | -0.57457400 | H | 6.89591700  | -1.82145600 | -1.56083500 |
| C                 | 2.84893800  | 3.90074900  | -0.62345700 | C | -0.73419900 | -2.83211500 | -1.49091400 |
| H                 | 3.71587300  | 3.44932800  | -1.09467000 | C | -1.62092200 | -2.41051600 | -2.50181400 |
| C                 | -0.54518300 | 5.75756300  | 1.30119800  | H | -2.12715000 | -1.45430000 | -2.41012300 |
|                   |             |             |             | C | -1.88617700 | -3.22169700 | -3.61400300 |

|   |             |             |             |              |             |             |             |
|---|-------------|-------------|-------------|--------------|-------------|-------------|-------------|
| C | -1.24456400 | -4.46281900 | -3.70519400 | H            | 1.27954900  | -4.35658900 | 4.83916300  |
| H | -1.44104100 | -5.09816000 | -4.56709100 | H            | 1.79239200  | -5.84173900 | 4.03450300  |
| C | -0.36136000 | -4.91183600 | -2.71647400 | H            | 0.10995000  | -5.29749100 | 3.90940700  |
| C | -0.11394600 | -4.08589900 | -1.61159200 | Ru           | -0.14231400 | 0.46568100  | -0.90432400 |
| H | 0.56398200  | -4.43421800 | -0.84044600 | P            | 1.91958200  | 1.23648300  | -0.04279500 |
| C | -2.86199700 | -2.77724700 | -4.67925400 | P            | -0.44280500 | -1.71299000 | -0.03230000 |
| H | -3.07580700 | -1.70668500 | -4.60548900 | H            | 6.80830400  | -0.94352300 | -0.02666400 |
| H | -3.81570100 | -3.31222000 | -4.58602900 | C            | -2.53744600 | 1.15027800  | -0.34295300 |
| H | -2.47700400 | -2.98002700 | -5.68475200 | C            | -3.92594600 | 1.56993000  | 0.06571900  |
| C | 0.32047200  | -6.25457800 | -2.84682600 | C            | -4.79967500 | 2.05964700  | -1.10918900 |
| H | -0.39576300 | -7.04052600 | -3.11122300 | C            | -6.20426700 | 2.41170100  | -0.66529800 |
| H | 0.81353100  | -6.54628300 | -1.91468200 | C            | -7.21594400 | 1.44191500  | -0.65989100 |
| H | 1.08354100  | -6.23704800 | -3.63545400 | C            | -8.50325300 | 1.75352500  | -0.21976400 |
| C | -1.96368700 | -1.91396300 | 0.99486200  | C            | -8.79878500 | 3.04461900  | 0.22252600  |
| C | -2.91591300 | -2.90498400 | 0.71631300  | C            | -7.80014200 | 4.02046500  | 0.21984700  |
| H | -2.78326700 | -3.56388800 | -0.13539400 | C            | -6.51418200 | 3.70392100  | -0.22092300 |
| C | -4.04847600 | -3.06340100 | 1.52531000  | H            | -4.39777800 | 0.69460400  | 0.53324500  |
| C | -4.20482200 | -2.21701400 | 2.62930600  | H            | -3.84319100 | 2.33316900  | 0.84587300  |
| H | -5.08085800 | -2.33310800 | 3.26502500  | H            | -4.32549600 | 2.93747300  | -1.56782600 |
| C | -3.26669400 | -1.22446600 | 2.93928300  | H            | -6.99525600 | 0.43603900  | -1.01189900 |
| C | -2.14999900 | -1.07833900 | 2.10714200  | H            | -9.27709100 | 0.99063100  | -0.22940600 |
| H | -1.43601300 | -0.29062900 | 2.32244300  | H            | -9.80157300 | 3.29018100  | 0.56058600  |
| C | -5.08790100 | -4.11351000 | 1.20612600  | H            | -8.02345200 | 5.02975200  | 0.55493900  |
| H | -4.71121500 | -4.84511700 | 0.48467000  | H            | -5.74349000 | 4.47241700  | -0.22789200 |
| H | -5.98986000 | -3.65968400 | 0.77573200  | O            | -1.53566500 | 1.38756100  | 0.41802500  |
| H | -5.39902300 | -4.65488700 | 2.10642500  | O            | -2.31674300 | 0.53679700  | -1.44183800 |
| C | -3.44743200 | -0.34232800 | 4.15364800  | H            | -4.82591200 | 1.27800600  | -1.87536600 |
| H | -3.12125500 | -0.85545600 | 5.06782600  | O            | 0.76692500  | -0.38098100 | -2.71481200 |
| H | -4.49801500 | -0.06796900 | 4.29707700  | H            | 0.46166800  | -1.30032600 | -2.84185400 |
| H | -2.86480000 | 0.58046000  | 4.06812200  | H            | 1.74365900  | -0.38018000 | -2.71393900 |
| C | 0.84956700  | -2.63162700 | 0.91337500  | O            | -0.22420400 | 2.35282000  | -2.13743200 |
| C | 0.52691700  | -3.39548400 | 2.04089700  | H            | -1.13422000 | 2.31089500  | -2.48446300 |
| H | -0.49193500 | -3.40986500 | 2.41343100  | H            | -0.17707900 | 3.12387400  | -1.53845400 |
| C | 1.50187800  | -4.16403700 | 2.69535500  |              |             |             |             |
| C | 2.80023800  | -4.17012200 | 2.18010900  | <b>TS8-w</b> |             |             |             |
| H | 3.55993400  | -4.77890700 | 2.66705000  | C            | 1.46344000  | 2.60700600  | -1.28039800 |
| C | 3.15179900  | -3.42301600 | 1.04656700  | C            | 1.84471300  | 2.12542200  | -2.54362400 |
| C | 2.16759500  | -2.64540300 | 0.42957700  | H            | 1.74716500  | 1.06521500  | -2.76474600 |
| H | 2.42948600  | -2.05961600 | -0.44838000 | C            | 2.40044900  | 2.97498400  | -3.51361200 |
| C | 4.56270900  | -3.47808000 | 0.50907800  | C            | 2.56944000  | 4.32499100  | -3.19457400 |
| H | 4.65637400  | -2.92164100 | -0.42755400 | H            | 2.99270800  | 4.99647900  | -3.93937200 |
| H | 4.87407500  | -4.51230300 | 0.32039200  | C            | 2.21762000  | 4.83781800  | -1.93796400 |
| H | 5.27858300  | -3.05486900 | 1.22484600  | C            | 1.66238900  | 3.96911900  | -0.99185300 |
| C | 1.15142200  | -4.96046600 | 3.93113300  | H            | 1.38186600  | 4.36451400  | -0.02075400 |

|   |             |             |             |   |             |             |             |
|---|-------------|-------------|-------------|---|-------------|-------------|-------------|
| C | 2.83586500  | 2.43564500  | -4.85652300 | C | -1.44487900 | -3.79403000 | -2.86776900 |
| H | 2.34101100  | 1.48785300  | -5.09155200 | C | -1.39622900 | -4.96180900 | -2.10116000 |
| H | 3.91777500  | 2.25201100  | -4.87140700 | H | -1.13054300 | -5.89994100 | -2.58415500 |
| H | 2.61726800  | 3.14379300  | -5.66275400 | C | -1.69647900 | -4.96447000 | -0.72717400 |
| C | 2.44124400  | 6.29732400  | -1.61598500 | C | -2.02496200 | -3.75437900 | -0.10890100 |
| H | 3.51182900  | 6.53457900  | -1.58577800 | H | -2.24032300 | -3.74235900 | 0.95455600  |
| H | 2.01329300  | 6.56556300  | -0.64555800 | C | -1.10376100 | -3.80717900 | -4.33931400 |
| H | 1.99092000  | 6.94634000  | -2.37594000 | H | -1.19867200 | -4.81105400 | -4.76355000 |
| C | -0.48938000 | 2.47221100  | 0.88015500  | H | -0.06989600 | -3.47552800 | -4.50060400 |
| C | -0.77844000 | 2.20047100  | 2.22217100  | H | -1.75488600 | -3.13355500 | -4.90663700 |
| H | -0.24816300 | 1.41170000  | 2.74505800  | C | -1.68124200 | -6.25687000 | 0.05414300  |
| C | -1.73822000 | 2.94335500  | 2.92551000  | H | -2.55347900 | -6.87468900 | -0.19472300 |
| C | -2.39017600 | 3.98643400  | 2.26421300  | H | -1.70093500 | -6.07434200 | 1.13250800  |
| H | -3.11757000 | 4.58641800  | 2.80747100  | H | -0.79012100 | -6.85158600 | -0.17508500 |
| C | -2.12009100 | 4.29214500  | 0.92267800  | C | -3.73851700 | -0.18308600 | -0.90351200 |
| C | -1.18593900 | 3.51074300  | 0.23444300  | C | -4.73031900 | -1.01100300 | -1.45299600 |
| H | -0.97115200 | 3.75110400  | -0.80251000 | H | -4.64445200 | -2.08951200 | -1.36324600 |
| C | -2.04228200 | 2.61771900  | 4.36939700  | C | -5.83020900 | -0.46959700 | -2.12625300 |
| H | -2.73015500 | 3.34694800  | 4.80763200  | C | -5.91832100 | 0.92432900  | -2.24706500 |
| H | -1.12893900 | 2.61075700  | 4.97586200  | H | -6.76370700 | 1.35501900  | -2.78036900 |
| H | -2.50037600 | 1.62513600  | 4.46043800  | C | -4.95649400 | 1.77865600  | -1.70042900 |
| C | -2.79111300 | 5.47333000  | 0.25937000  | C | -3.86059300 | 1.21102300  | -1.02811700 |
| H | -2.59787600 | 5.49746300  | -0.81786500 | H | -3.12563600 | 1.86533500  | -0.56212400 |
| H | -2.42299700 | 6.41788500  | 0.67933200  | C | -6.90059100 | -1.35909400 | -2.71391300 |
| H | -3.87648700 | 5.45937900  | 0.40971500  | H | -6.65519500 | -2.41803800 | -2.59151900 |
| C | 2.11304500  | 1.20256800  | 1.21554000  | H | -7.03406900 | -1.16499300 | -3.78465000 |
| C | 3.25747100  | 2.01523100  | 1.21971100  | H | -7.86991200 | -1.18168100 | -2.23229100 |
| H | 3.39201400  | 2.77469100  | 0.45781400  | C | -5.11257100 | 3.27739200  | -1.81101600 |
| C | 4.24794700  | 1.85712100  | 2.19553900  | H | -5.64856200 | 3.68123100  | -0.94223200 |
| C | 4.06549000  | 0.87769500  | 3.18005700  | H | -5.68389500 | 3.55458800  | -2.70242900 |
| H | 4.82403800  | 0.75513600  | 3.95095200  | H | -4.14366400 | 3.78381000  | -1.85647200 |
| C | 2.94245900  | 0.04346800  | 3.19375100  | C | -2.71210600 | -1.14682100 | 1.67917900  |
| C | 1.97504900  | 0.20779600  | 2.19362500  | C | -3.98822400 | -0.83587000 | 2.15999200  |
| H | 1.12086900  | -0.45802200 | 2.16434800  | H | -4.74202300 | -0.43947700 | 1.48677900  |
| C | 5.50105300  | 2.70125600  | 2.17021600  | C | -4.31235100 | -1.03082500 | 3.51101400  |
| H | 5.34954800  | 3.63028100  | 1.61179800  | C | -3.33087800 | -1.54521200 | 4.36336500  |
| H | 6.32659200  | 2.15996900  | 1.68991100  | H | -3.57374700 | -1.70404900 | 5.41255100  |
| H | 5.82850300  | 2.96246300  | 3.18216700  | C | -2.04300000 | -1.86805500 | 3.90802800  |
| C | 2.76995000  | -1.00961700 | 4.26458500  | C | -1.73878600 | -1.65059800 | 2.56098400  |
| H | 2.03512500  | -0.69594900 | 5.01720100  | H | -0.74452400 | -1.88770400 | 2.18976800  |
| H | 3.71057700  | -1.20626100 | 4.78787100  | C | -1.01730200 | -2.43615200 | 4.86175900  |
| C | -2.08065600 | -2.56226600 | -0.84693800 | H | -0.07462000 | -2.65729200 | 4.35273400  |
| C | -1.79415700 | -2.59114800 | -2.22719400 | H | -1.37558800 | -3.36512600 | 5.32125600  |
| H | -1.88173600 | -1.68821600 | -2.82660400 | H | -0.80301900 | -1.73772100 | 5.68006100  |

|    |             |             |             |
|----|-------------|-------------|-------------|
| C  | -5.70202800 | -0.72345500 | 4.01997700  |
| H  | -6.37579100 | -1.57602300 | 3.86398800  |
| H  | -6.13951400 | 0.13490300  | 3.49942200  |
| H  | -5.69696800 | -0.50490200 | 5.09241300  |
| Ru | -0.06876300 | -0.46706600 | -0.97520900 |
| P  | 0.75863600  | 1.43751500  | -0.02084800 |
| P  | -2.25142200 | -0.89346100 | -0.07671400 |
| H  | 2.41648500  | -1.95558700 | 3.83900800  |
| C  | 1.84203900  | -1.94653800 | -0.91504000 |
| C  | 3.32584600  | -1.61179300 | -0.83541100 |
| C  | 4.08755500  | -2.68088700 | -0.01246700 |
| C  | 5.58160600  | -2.43474300 | -0.02379200 |
| C  | 6.38722300  | -2.98772800 | -1.02898600 |
| C  | 7.76085800  | -2.74285400 | -1.06192600 |
| C  | 8.35243800  | -1.93840600 | -0.08571500 |
| C  | 7.56096500  | -1.38301400 | 0.92169600  |
| C  | 6.18706300  | -1.62933600 | 0.95029300  |
| H  | 3.72891900  | -1.57488400 | -1.85212300 |
| H  | 3.44973100  | -0.62822400 | -0.37929000 |
| H  | 3.70583100  | -2.66831100 | 1.01464800  |
| H  | 5.93494100  | -3.62345500 | -1.78758800 |
| H  | 8.36990800  | -3.18659000 | -1.84492700 |
| H  | 9.42259900  | -1.75199300 | -0.10609200 |
| H  | 8.01559700  | -0.76474000 | 1.69167600  |
| H  | 5.57666200  | -1.19629900 | 1.73943500  |
| O  | 1.63764000  | -2.99965800 | -1.76603400 |
| O  | 1.06627500  | -1.86581200 | 0.12930300  |
| H  | 3.86867300  | -3.66949700 | -0.43039500 |
| H  | 1.43947300  | -0.73227500 | -1.75957600 |
| H  | 0.76395100  | -3.38260100 | -1.56066600 |
| O  | -1.01722900 | 0.71534300  | -2.61081600 |
| H  | -1.87839500 | 1.09263300  | -2.34577200 |
| H  | -0.43995800 | 1.45992000  | -2.86462000 |

**TS8**

|   |             |             |             |
|---|-------------|-------------|-------------|
| C | -0.33415800 | -2.46184500 | -1.64365000 |
| C | -0.65146300 | -1.81945000 | -2.85735000 |
| H | -1.16135500 | -0.85663600 | -2.84400400 |
| C | -0.36625300 | -2.41914800 | -4.09034000 |
| C | 0.22116700  | -3.69077700 | -4.08637500 |
| H | 0.43665400  | -4.17533500 | -5.03696200 |
| C | 0.52977000  | -4.36480900 | -2.89704400 |
| C | 0.25986500  | -3.73084600 | -1.67656500 |
| H | 0.51395800  | -4.23555600 | -0.75015800 |

|   |             |             |             |
|---|-------------|-------------|-------------|
| C | -0.69159300 | -1.72332900 | -5.39154000 |
| H | 0.21890400  | -1.50890600 | -5.96423300 |
| H | -1.21005200 | -0.77485700 | -5.22137600 |
| H | -1.33103700 | -2.34740200 | -6.02646300 |
| C | 1.11468700  | -5.75776300 | -2.92846700 |
| H | 1.69466600  | -5.97078000 | -2.02508800 |
| H | 1.76719500  | -5.89953200 | -3.79605100 |
| H | 0.32112500  | -6.51348900 | -2.99306100 |
| C | 0.35920100  | -2.38914300 | 1.20028500  |
| C | -0.20517500 | -2.92533700 | 2.36566000  |
| H | -1.27447200 | -2.86489800 | 2.53282200  |
| C | 0.59337500  | -3.56262500 | 3.32554000  |
| C | 1.96933800  | -3.65406800 | 3.09641600  |
| H | 2.59750800  | -4.14838900 | 3.83553200  |
| C | 2.56243100  | -3.13378600 | 1.93850200  |
| C | 1.74429400  | -2.49995300 | 0.99976100  |
| H | 2.20047800  | -2.10291300 | 0.09902500  |
| C | -0.02439700 | -4.16672200 | 4.56612100  |
| H | -1.03994800 | -3.79410000 | 4.73193900  |
| H | 0.56991500  | -3.94251800 | 5.45882600  |
| H | -0.08447500 | -5.25966100 | 4.48565500  |
| C | 4.05359500  | -3.24415100 | 1.72109100  |
| H | 4.59980200  | -2.60969600 | 2.42986200  |
| H | 4.33595600  | -2.93073300 | 0.71147500  |
| H | 4.40437700  | -4.27195900 | 1.86930900  |
| C | -2.39975800 | -1.94998800 | 0.40436900  |
| C | -3.12434300 | -2.95027700 | -0.25708400 |
| H | -2.67838900 | -3.48930300 | -1.08706600 |
| C | -4.42538300 | -3.27705500 | 0.14702700  |
| C | -4.98172200 | -2.58478800 | 1.22852400  |
| H | -5.99158300 | -2.83225100 | 1.55046300  |
| C | -4.28093800 | -1.57982800 | 1.90786500  |
| C | -2.98533000 | -1.26594300 | 1.48109000  |
| H | -2.43769700 | -0.47528000 | 1.98675400  |
| C | -5.20069900 | -4.37197100 | -0.54882400 |
| H | -5.21201300 | -5.29037400 | 0.05210200  |
| H | -4.76192800 | -4.61940200 | -1.52032300 |
| H | -6.24400500 | -4.08073800 | -0.71189100 |
| C | -4.92823000 | -0.82922800 | 3.04897200  |
| H | -5.49111600 | -1.50410100 | 3.70285000  |
| H | -5.63646600 | -0.07887800 | 2.67378700  |
| C | 1.98338700  | 2.92752700  | -0.20446300 |
| C | 2.36430200  | 3.49073400  | -1.43532100 |
| H | 2.73676500  | 2.85413100  | -2.23215500 |

|   |             |             |             |                 |             |             |             |
|---|-------------|-------------|-------------|-----------------|-------------|-------------|-------------|
| C | 2.27985200  | 4.86991300  | -1.65521200 | C               | 5.30218900  | 0.36513400  | 4.18257800  |
| C | 1.79332500  | 5.68494000  | -0.62293000 | H               | 6.01761800  | 0.15872100  | 3.38035200  |
| H | 1.72198600  | 6.75860800  | -0.78562900 | H               | 5.37397900  | -0.44428900 | 4.91789400  |
| C | 1.39388400  | 5.15606400  | 0.60883500  | H               | 5.62768900  | 1.28460400  | 4.68576100  |
| C | 1.48380200  | 3.76756500  | 0.80382600  | Ru              | -0.30379200 | 0.61713800  | -0.75365200 |
| H | 1.18022200  | 3.34797400  | 1.75813200  | P               | -0.67420300 | -1.55465500 | -0.07648700 |
| C | 2.70442900  | 5.47499900  | -2.97312600 | P               | 1.95802800  | 1.08563400  | 0.01248500  |
| H | 2.98176100  | 4.70440400  | -3.69854400 | H               | -4.18555000 | -0.30679000 | 3.66040700  |
| H | 3.56812000  | 6.13852700  | -2.84288800 | H               | -1.89453400 | 0.68373900  | -1.34946800 |
| H | 1.89995100  | 6.07695600  | -3.41149000 | C               | -1.88238400 | 2.09842300  | -0.49450700 |
| C | 0.90524800  | 6.05668600  | 1.71965200  | C               | -3.33815200 | 2.44664900  | -0.72126100 |
| H | 0.19291000  | 5.54099300  | 2.37191900  | C               | -4.35099500 | 1.48511800  | -0.08666500 |
| H | 0.41948000  | 6.95427400  | 1.32394500  | C               | -5.77754100 | 1.95344500  | -0.29146700 |
| H | 1.74091600  | 6.38896800  | 2.34909400  | C               | -6.51084900 | 1.55069800  | -1.41564700 |
| C | 3.40080700  | 0.52683800  | -0.98142900 | C               | -7.81485200 | 2.00495300  | -1.61915100 |
| C | 4.64801500  | 1.16936900  | -0.90215100 | C               | -8.40668500 | 2.87101300  | -0.69736600 |
| H | 4.77455000  | 2.03160500  | -0.25378300 | C               | -7.68747500 | 3.27795800  | 0.42809700  |
| C | 5.73450300  | 0.73172800  | -1.66683100 | C               | -6.38353400 | 2.82132700  | 0.62754100  |
| C | 5.54827900  | -0.35925000 | -2.52710000 | H               | -3.45569200 | 3.45341600  | -0.29382300 |
| H | 6.38781200  | -0.70646100 | -3.12703400 | H               | -3.50318100 | 2.54706700  | -1.79786300 |
| C | 4.31399500  | -1.00529400 | -2.65011300 | H               | -4.21622300 | 0.48679700  | -0.51720800 |
| C | 3.24406400  | -0.54837400 | -1.86718000 | H               | -6.05909200 | 0.86993600  | -2.13470200 |
| H | 2.27759900  | -1.03740100 | -1.96213100 | H               | -8.37003900 | 1.67898700  | -2.49453400 |
| C | 7.07668100  | 1.42116800  | -1.58082000 | H               | -9.42264100 | 3.22275700  | -0.85284300 |
| H | 7.07186000  | 2.21782200  | -0.83100800 | H               | -8.14248100 | 3.94728100  | 1.15315000  |
| H | 7.35482900  | 1.86880500  | -2.54269600 | H               | -5.83070000 | 3.13991400  | 1.50934900  |
| H | 7.87064500  | 0.71327800  | -1.31506400 | O               | -1.38351100 | 1.77089000  | 0.64998200  |
| C | 4.13908400  | -2.15244200 | -3.61860200 | H               | -4.13227100 | 1.40037200  | 0.98230200  |
| H | 4.92549600  | -2.90511100 | -3.49009200 | O               | -1.01394300 | 2.87105500  | -1.30507200 |
| H | 4.19671300  | -1.80326700 | -4.65730200 | H               | -0.36118900 | 3.30639300  | -0.71178300 |
| H | 3.17163500  | -2.64628000 | -3.48737900 |                 |             |             |             |
| C | 2.35107700  | 0.81913200  | 1.79184200  | <b>TSH_HOAc</b> |             |             |             |
| C | 3.65648500  | 0.65921700  | 2.27960900  | C               | -3.30919400 | 0.23500400  | 1.32689200  |
| H | 4.49917400  | 0.64574800  | 1.59683000  | C               | -3.60013000 | -0.67265900 | 2.35054100  |
| C | 3.89442100  | 0.50568000  | 3.64942900  | H               | -2.94909400 | -1.52605700 | 2.50760300  |
| C | 2.79910000  | 0.50530300  | 4.52406600  | C               | -4.70180400 | -0.49328700 | 3.19874600  |
| H | 2.97582000  | 0.38411400  | 5.59128400  | C               | -5.51483100 | 0.62651900  | 3.01149500  |
| C | 1.48674400  | 0.65110200  | 4.06550700  | H               | -6.36911800 | 0.78053700  | 3.66910900  |
| C | 1.27465000  | 0.80741400  | 2.68902200  | C               | -5.25111500 | 1.56051300  | 2.00138100  |
| H | 0.26053400  | 0.91398100  | 2.31389100  | C               | -4.14913700 | 1.35166100  | 1.16646700  |
| C | 0.31698000  | 0.60224600  | 5.02101400  | H               | -3.94143100 | 2.08031400  | 0.38960600  |
| H | 0.62005100  | 0.85819800  | 6.04105700  | C               | -4.99968700 | -1.50321500 | 4.28410400  |
| H | -0.12091400 | -0.40423900 | 5.05046200  | H               | -4.08980600 | -1.78685100 | 4.82544800  |
| H | -0.47722500 | 1.29391500  | 4.71936300  | H               | -5.42639100 | -2.42454000 | 3.86582900  |

|   |             |             |             |   |             |             |             |
|---|-------------|-------------|-------------|---|-------------|-------------|-------------|
| H | -5.71720600 | -1.10993800 | 5.01182200  | C | 4.51572000  | -2.63273000 | -1.90017300 |
| C | -6.12655800 | 2.78290100  | 1.83785100  | C | 3.60463800  | -1.59495400 | -1.67526500 |
| H | -7.19091900 | 2.52489100  | 1.89109600  | H | 3.35998800  | -0.92841100 | -2.49538400 |
| H | -5.94696700 | 3.27908000  | 0.87856300  | C | 4.61253700  | -4.25460700 | 1.56856600  |
| H | -5.93436700 | 3.51951600  | 2.62928800  | H | 3.74089900  | -4.85539400 | 1.85845900  |
| C | -1.63161400 | 1.62845400  | -0.50936800 | H | 4.93172500  | -3.70111200 | 2.45991700  |
| C | -1.95962400 | 1.99933900  | -1.81603400 | H | 5.41682900  | -4.94547300 | 1.29494500  |
| H | -2.34331100 | 1.25977700  | -2.51134500 | C | 5.13184900  | -2.83967600 | -3.26596900 |
| C | -1.81563500 | 3.32690800  | -2.24766700 | H | 6.21682500  | -2.98544400 | -3.20025300 |
| C | -1.33607300 | 4.27664600  | -1.34263100 | H | 4.94627500  | -1.98290400 | -3.92193200 |
| H | -1.23873500 | 5.31316300  | -1.66230900 | H | 4.71836100  | -3.72889000 | -3.76017200 |
| C | -0.98788000 | 3.93193200  | -0.02875900 | C | 2.96197500  | 1.21739200  | 0.74571700  |
| C | -1.14069400 | 2.60323200  | 0.37533400  | C | 4.33197900  | 1.24974200  | 0.44118900  |
| H | -0.90044500 | 2.32330300  | 1.39782300  | H | 4.74577100  | 0.52919100  | -0.25766900 |
| C | -2.17577300 | 3.70987900  | -3.66485900 | C | 5.18376700  | 2.19058900  | 1.02882900  |
| H | -2.22408200 | 4.79709300  | -3.78676100 | C | 4.64138400  | 3.11031800  | 1.93531300  |
| H | -3.14669700 | 3.29376700  | -3.95872900 | H | 5.29742700  | 3.84233400  | 2.40483900  |
| H | -1.43235700 | 3.32626200  | -4.37495400 | C | 3.28147300  | 3.10600300  | 2.26034700  |
| C | -0.44619800 | 4.97293900  | 0.92411000  | C | 2.44948000  | 2.15151600  | 1.65639400  |
| H | -0.73131500 | 4.75561000  | 1.95903100  | H | 1.39924900  | 2.11761700  | 1.92189600  |
| H | -0.81103000 | 5.97524900  | 0.67408900  | C | 6.66389200  | 2.19653300  | 0.71858600  |
| H | 0.65092800  | 5.00530800  | 0.88972900  | H | 7.04642300  | 3.21733700  | 0.60308500  |
| C | -2.69848500 | -1.01235900 | -1.20277700 | H | 6.88113300  | 1.64700600  | -0.20285400 |
| C | -3.98427100 | -0.67836300 | -1.66369700 | H | 7.24110600  | 1.72492200  | 1.52505700  |
| H | -4.52729600 | 0.14255600  | -1.20499300 | C | 2.71938300  | 4.11519100  | 3.23744400  |
| C | -4.59064000 | -1.39556100 | -2.69738200 | H | 1.80116400  | 3.74724900  | 3.70671900  |
| C | -3.89219100 | -2.47213100 | -3.26547500 | H | 2.47369300  | 5.06279700  | 2.73951000  |
| H | -4.36174300 | -3.04547800 | -4.06382100 | H | 3.43841300  | 4.34635400  | 4.03139100  |
| C | -2.62102000 | -2.83974700 | -2.81946300 | C | 1.52773800  | 0.69888500  | -1.71644700 |
| C | -2.03122500 | -2.09803500 | -1.78174400 | C | 1.91962800  | 1.99745000  | -2.05867600 |
| H | -1.06811800 | -2.40287600 | -1.38310400 | H | 2.41160200  | 2.62618100  | -1.32346400 |
| C | -5.97272700 | -1.03235200 | -3.19240100 | C | 1.69495800  | 2.50549900  | -3.34501100 |
| H | -6.39798700 | -0.20490300 | -2.61587700 | C | 1.08239600  | 1.68117900  | -4.29412100 |
| H | -6.66175900 | -1.88256900 | -3.11495300 | H | 0.92143600  | 2.05962100  | -5.30245200 |
| H | -5.95451200 | -0.72990900 | -4.24735300 | C | 0.67184300  | 0.37891100  | -3.98061300 |
| C | -1.88347400 | -4.00783600 | -3.43521500 | C | 0.89224000  | -0.09506700 | -2.68330300 |
| H | -1.14802500 | -3.66960900 | -4.17744700 | H | 0.58198300  | -1.10459300 | -2.42914800 |
| H | -2.57014100 | -4.69256000 | -3.94424500 | C | 0.01704500  | -0.50456500 | -5.01876900 |
| C | 3.01390500  | -1.40762400 | -0.41539600 | H | 0.67167400  | -1.33870900 | -5.30376000 |
| C | 3.36226600  | -2.27332700 | 0.62814900  | H | -0.21809300 | 0.05537300  | -5.92994500 |
| H | 2.92503900  | -2.12791400 | 1.60999500  | H | -0.91406600 | -0.94042400 | -4.63813600 |
| C | 4.27278800  | -3.31948100 | 0.42987600  | C | 2.09563000  | 3.92288300  | -3.68431700 |
| C | 4.83788100  | -3.48576300 | -0.83697700 | H | 1.38470200  | 4.64274200  | -3.25767800 |
| H | 5.54558800  | -4.29713400 | -1.00116300 | H | 2.12265600  | 4.08540700  | -4.76699300 |



|    |             |             |             |   |             |             |             |
|----|-------------|-------------|-------------|---|-------------|-------------|-------------|
| H  | 3.08435600  | 4.16836300  | -3.27992300 | C | -1.37553600 | 1.20183000  | 4.42198600  |
| Ru | -0.03119100 | -0.96574900 | 1.26258700  | H | -1.27511700 | 1.48475100  | 5.46875500  |
| P  | -1.86807100 | -0.07862300 | 0.17273700  | C | -0.93238200 | -0.06110200 | 4.01109600  |
| P  | 1.82171700  | -0.02737400 | -0.03766800 | C | -1.08079700 | -0.41493000 | 2.66566200  |
| H  | -1.33359000 | -4.57446000 | -2.67608000 | H | -0.75284500 | -1.39799100 | 2.34038300  |
| C  | 0.96813800  | -0.27278200 | 3.53623700  | C | -2.38878400 | 3.47949800  | 3.97276800  |
| C  | 1.52590300  | 0.17600700  | 4.86310100  | H | -2.56939900 | 3.51020900  | 5.05265200  |
| H  | 2.47312000  | 0.70102800  | 4.68994000  | H | -3.30779600 | 3.79407000  | 3.46580200  |
| H  | 0.83303000  | 0.85942400  | 5.35939000  | H | -1.61992900 | 4.22971300  | 3.74471000  |
| O  | 0.10483700  | 0.43715000  | 2.92993500  | C | -0.31103700 | -1.02846400 | 4.99366600  |
| O  | 1.38928600  | -1.34932700 | 2.99181300  | H | -0.26074500 | -0.59981700 | 5.99990700  |
| C  | -0.55405200 | -3.34336300 | 1.45414500  | H | 0.70845100  | -1.29905900 | 4.69205200  |
| C  | -1.87414500 | -4.07463000 | 1.29313400  | H | -0.88699800 | -1.96045000 | 5.05703400  |
| H  | -2.39455300 | -4.16784300 | 2.24875400  | C | -3.02771200 | 1.17176600  | -0.70931500 |
| H  | -2.50446800 | -3.56432800 | 0.56441500  | C | -4.41446000 | 1.07173000  | -0.51702500 |
| O  | 0.13544900  | -3.83680200 | 2.52702900  | H | -4.82324700 | 0.22906800  | 0.03177400  |
| O  | 0.08650400  | -2.94451000 | 0.40532500  | C | -5.28910400 | 2.03416200  | -1.03133300 |
| H  | -1.11965800 | -2.00287500 | 2.08338000  | C | -4.75350900 | 3.10879500  | -1.75323700 |
| H  | 0.90130500  | -3.24752600 | 2.68040300  | H | -5.42704000 | 3.85611400  | -2.17107000 |
| H  | 1.72975700  | -0.68836500 | 5.50071900  | C | -3.37726500 | 3.23927400  | -1.96115100 |
| H  | -1.64863500 | -5.08149500 | 0.92038100  | C | -2.52253600 | 2.25982000  | -1.43312900 |

#### TSH\_HOAc\_a

|   |             |             |             |   |             |             |             |
|---|-------------|-------------|-------------|---|-------------|-------------|-------------|
| C | -2.95423000 | -1.57695400 | 0.14253600  | H | -1.45717300 | 2.32362100  | -1.62145800 |
| C | -3.11537900 | -2.39510300 | -0.98194700 | C | -6.78117200 | 1.92332900  | -0.81060700 |
| H | -2.58183200 | -2.15804100 | -1.89603200 | H | -7.05309000 | 0.94091700  | -0.41203300 |
| C | -3.96291500 | -3.51115700 | -0.94858200 | H | -7.33700100 | 2.07390400  | -1.74375000 |
| C | -4.64849600 | -3.79863500 | 0.23405600  | H | -7.13742800 | 2.67969000  | -0.09867500 |
| H | -5.30704500 | -4.66539600 | 0.27005000  | C | -2.82035400 | 4.41460700  | -2.73413000 |
| C | -4.51030000 | -2.99767600 | 1.37547300  | H | -2.65625800 | 5.28268100  | -2.08134200 |
| C | -3.66328200 | -1.88649800 | 1.31514000  | H | -3.50589500 | 4.73387200  | -3.52711200 |
| H | -3.56072500 | -1.25892700 | 2.19445800  | C | 3.30041700  | 0.47778600  | -1.20055300 |
| C | -4.11488400 | -4.38308800 | -2.17441700 | C | 3.82672700  | -0.49998700 | -2.06160100 |
| H | -3.15498400 | -4.82926700 | -2.46268300 | H | 3.39037000  | -1.49364100 | -2.08543200 |
| H | -4.46902100 | -3.80340300 | -3.03572400 | C | 4.91767300  | -0.22576700 | -2.88938700 |
| H | -4.82551100 | -5.19836500 | -2.00247200 | C | 5.48720700  | 1.05487400  | -2.85006400 |
| C | -5.25084500 | -3.33959700 | 2.64934000  | H | 6.33886200  | 1.27857000  | -3.49101900 |
| H | -5.24534500 | -2.50054400 | 3.35291100  | C | 4.98950400  | 2.04793500  | -2.00535000 |
| H | -4.79438300 | -4.19877500 | 3.15905700  | C | 3.89791600  | 1.74304000  | -1.17688800 |
| H | -6.29572300 | -3.60464800 | 2.44854500  | H | 3.52037900  | 2.51260800  | -0.51241300 |
| C | -1.67122700 | 0.46030600  | 1.74220400  | C | 5.46306700  | -1.28224200 | -3.82378700 |
| C | -2.09848700 | 1.71802700  | 2.18374800  | H | 5.10133000  | -2.27896400 | -3.55235800 |
| H | -2.56290900 | 2.40603100  | 1.48467400  | H | 6.55934200  | -1.30281700 | -3.81169800 |
| C | -1.95014800 | 2.10524500  | 3.52164200  | H | 5.15587600  | -1.09143200 | -4.86070300 |
|   |             |             |             | C | 5.59410500  | 3.43412200  | -1.99063500 |
|   |             |             |             | H | 5.01740000  | 4.12598900  | -2.61925800 |

|    |             |             |             |
|----|-------------|-------------|-------------|
| H  | 6.62138300  | 3.42778600  | -2.37041600 |
| H  | 5.60882700  | 3.85561600  | -0.97911500 |
| C  | 2.71932000  | -1.06766600 | 1.14279400  |
| C  | 4.04848900  | -0.83061500 | 1.53267600  |
| H  | 4.59641200  | 0.00024300  | 1.09749100  |
| C  | 4.68634600  | -1.65216500 | 2.46610900  |
| C  | 3.97435600  | -2.73391600 | 3.00571700  |
| H  | 4.46747400  | -3.38573000 | 3.72542800  |
| C  | 2.65524100  | -3.00460400 | 2.63415700  |
| C  | 2.03525700  | -2.15845800 | 1.69808200  |
| H  | 1.02242100  | -2.37238700 | 1.37137000  |
| C  | 6.12216600  | -1.40269600 | 2.86920900  |
| H  | 6.24123400  | -1.41839100 | 3.95918400  |
| H  | 6.47666600  | -0.43368600 | 2.50446400  |
| H  | 6.78893300  | -2.17361400 | 2.46158100  |
| C  | 1.89922000  | -4.17161500 | 3.22872200  |
| H  | 1.22331000  | -4.62345400 | 2.49477300  |
| H  | 1.28381700  | -3.85364000 | 4.08079700  |
| H  | 2.58102700  | -4.94865800 | 3.58994300  |
| C  | 1.56431300  | 1.59378100  | 0.81370800  |
| C  | 1.90604000  | 1.78245400  | 2.15605400  |
| H  | 2.34964300  | 0.97015300  | 2.72282900  |
| C  | 1.69283500  | 3.01540900  | 2.78830700  |
| C  | 1.14137400  | 4.06244000  | 2.04425800  |
| H  | 0.99105400  | 5.03025600  | 2.52046000  |
| C  | 0.78164600  | 3.90113000  | 0.69964400  |
| C  | 0.99382600  | 2.65770200  | 0.09577100  |
| H  | 0.73718500  | 2.51657600  | -0.95098500 |
| C  | 0.15847900  | 5.03854200  | -0.07713200 |
| H  | 0.51112000  | 5.05682000  | -1.11424700 |
| H  | 0.38807200  | 6.00841700  | 0.37703900  |
| H  | -0.93463700 | 4.93971600  | -0.10978600 |
| C  | 2.04106100  | 3.19559900  | 4.24786400  |
| H  | 2.99151700  | 2.71038100  | 4.49789100  |
| H  | 1.27057700  | 2.74901600  | 4.88984800  |
| H  | 2.12147700  | 4.25485100  | 4.51422500  |
| Ru | 0.08963000  | -0.76360400 | -1.36375700 |
| P  | -1.84760700 | -0.09189300 | -0.02077000 |
| P  | 1.86060400  | 0.01460400  | -0.10434000 |
| H  | -1.85792300 | 4.16902900  | -3.19469700 |
| H  | 1.22243600  | -1.61380700 | -2.32220100 |
| C  | -0.83807500 | 0.28585700  | -3.52022500 |
| C  | -1.33332700 | 0.94638700  | -4.78316700 |
| H  | -0.64903000 | 1.73755500  | -5.09855700 |

|   |             |             |             |
|---|-------------|-------------|-------------|
| H | -1.44466700 | 0.20361000  | -5.57795200 |
| O | -0.01097600 | 0.89556800  | -2.76141700 |
| O | -1.25826200 | -0.86551100 | -3.18584700 |
| C | 0.93489800  | -3.04493000 | -1.69374100 |
| C | 0.48781500  | -3.71150800 | -2.98148600 |
| H | 2.35053600  | -3.17106000 | -0.43254300 |
| H | -0.39276100 | -3.20197000 | -3.37281600 |
| H | 1.28717900  | -3.69601100 | -3.72654000 |
| O | 0.09961600  | -2.83946200 | -0.73405200 |
| O | 2.21517000  | -3.42900200 | -1.36508500 |
| H | -2.31953200 | 1.38621000  | -4.59242800 |
| H | 0.24027400  | -4.75538400 | -2.75044500 |

### III

|   |             |             |             |
|---|-------------|-------------|-------------|
| C | 1.80309300  | -2.75441500 | 0.17111700  |
| C | 1.52668100  | -3.12697600 | 1.48333800  |
| H | 1.10886700  | -2.40455900 | 2.17472100  |
| C | 1.79462000  | -4.42638500 | 1.92717100  |
| C | 2.35029700  | -5.33715200 | 1.03449900  |
| H | 2.56427200  | -6.35020300 | 1.37243200  |
| C | 2.64193300  | -4.98691500 | -0.28883100 |
| C | 2.36239300  | -3.69110900 | -0.70845400 |
| H | 2.58227700  | -3.40612600 | -1.73414500 |
| C | 1.46324000  | -4.81580800 | 3.34601500  |
| H | 1.91658000  | -5.77472900 | 3.61563800  |
| H | 0.37908900  | -4.90581900 | 3.48139800  |
| H | 1.81543000  | -4.05891000 | 4.05455300  |
| C | 3.23192500  | -6.00218800 | -1.23626300 |
| H | 3.52928900  | -5.53816400 | -2.18131900 |
| H | 2.50831500  | -6.79317800 | -1.46602300 |
| H | 4.11545900  | -6.48388700 | -0.80286500 |
| C | 1.02593400  | -1.33394100 | -2.13162500 |
| C | 1.73488000  | -0.85988700 | -3.22848900 |
| H | 2.62988200  | -0.26155000 | -3.08200400 |
| C | 1.31999400  | -1.16294300 | -4.52891800 |
| C | 0.18293600  | -1.94681800 | -4.70387400 |
| H | -0.14037500 | -2.19307800 | -5.71404500 |
| C | -0.55517400 | -2.42300500 | -3.61655500 |
| C | -0.11208300 | -2.12054600 | -2.33367300 |
| H | -0.64166300 | -2.51746000 | -1.46981500 |
| C | 2.08989900  | -0.62581100 | -5.70726000 |
| H | 1.92756000  | 0.45401000  | -5.80885200 |
| H | 1.77813000  | -1.10039200 | -6.64261300 |
| H | 3.16650600  | -0.78595700 | -5.58572700 |

|   |             |             |             |    |             |             |             |
|---|-------------|-------------|-------------|----|-------------|-------------|-------------|
| C | -1.82762200 | -3.20377800 | -3.82276200 | C  | -3.31885700 | -1.01592500 | -0.88712600 |
| H | -1.84715900 | -3.69505100 | -4.80063900 | H  | -2.46927400 | -1.52875700 | -1.32456400 |
| H | -2.69878800 | -2.53745000 | -3.76803000 | C  | -6.61829800 | 0.91826600  | 1.07187800  |
| H | -1.95641300 | -3.97066400 | -3.05219300 | H  | -6.74792000 | 0.46590100  | 2.06236400  |
| C | 3.16474600  | -0.28723100 | -0.41049800 | H  | -7.56050800 | 0.79419600  | 0.52717100  |
| C | 4.24712600  | -0.91700100 | 0.20682400  | H  | -6.44336100 | 1.98901900  | 1.21210800  |
| H | 4.13194200  | -1.91717800 | 0.61272700  | C  | -4.67242700 | -3.10591500 | -1.26153200 |
| C | 5.47062400  | -0.26250600 | 0.34788500  | H  | -4.93353600 | -3.13610500 | -2.32667900 |
| C | 5.59762000  | 1.03524700  | -0.14623600 | H  | -5.45332300 | -3.64107200 | -0.71207100 |
| H | 6.54127400  | 1.56176500  | -0.01529800 | H  | -3.73389600 | -3.65607600 | -1.13731300 |
| C | 4.53308300  | 1.68887700  | -0.76482200 | C  | -1.02584300 | 1.33418900  | -2.13152200 |
| C | 3.31893900  | 1.01595800  | -0.88670400 | C  | -1.73465000 | 0.86019600  | -3.22849800 |
| H | 2.46937300  | 1.52893200  | -1.32401100 | H  | -2.62964300 | 0.26181000  | -3.08216200 |
| C | 6.61827500  | -0.91892700 | 1.07179100  | C  | -1.31963600 | 1.16337600  | -4.52886300 |
| H | 6.74729800  | -0.46742000 | 2.06274900  | C  | -0.18259000 | 1.94730200  | -4.70363300 |
| H | 7.56067700  | -0.79399400 | 0.52761900  | H  | 0.14081400  | 2.19367000  | -5.71374900 |
| H | 6.44367700  | -1.98987200 | 1.21097600  | C  | 0.55536500  | 2.42346400  | -3.61619300 |
| C | 4.67272200  | 3.10590900  | -1.26071200 | C  | 0.11214700  | 2.12088700  | -2.33338900 |
| H | 4.93497600  | 3.13630100  | -2.32557200 | H  | 0.64161700  | 2.51776300  | -1.46944800 |
| H | 5.45288500  | 3.64118400  | -0.71032100 | C  | 1.82776500  | 3.20436400  | -3.82220900 |
| C | -1.80322500 | 2.75442400  | 0.17125500  | H  | 1.95656000  | 3.97097700  | -3.05137100 |
| C | -1.52684000 | 3.12692700  | 1.48349900  | H  | 1.84720100  | 3.69600300  | -4.79990300 |
| H | -1.10905300 | 2.40447200  | 2.17485500  | H  | 2.69897600  | 2.53806700  | -3.76778300 |
| C | -1.79480100 | 4.42631600  | 1.92737800  | C  | -2.08943200 | 0.62633600  | -5.70731900 |
| C | -2.35046200 | 5.33711700  | 1.03473700  | H  | -3.16599500 | 0.78711100  | -5.58620900 |
| H | -2.56444700 | 6.35015500  | 1.37270200  | H  | -1.92765400 | -0.45360000 | -5.80854400 |
| C | -2.64207200 | 4.98693800  | -0.28861700 | H  | -1.77706700 | 1.10048500  | -6.64269300 |
| C | -2.36250700 | 3.69115400  | -0.70828900 | Ru | -0.00003700 | -0.00001500 | 1.03127000  |
| H | -2.58237600 | 3.40620600  | -1.73399300 | P  | 1.48923400  | -1.03146000 | -0.38737100 |
| C | -1.46344500 | 4.81567700  | 3.34624700  | P  | -1.48927100 | 1.03151700  | -0.38733900 |
| H | -1.91689300 | 5.77452600  | 3.61594600  | H  | 3.73393700  | 3.65582800  | -1.13739600 |
| H | -0.37930200 | 4.90580600  | 3.48161900  | C  | -2.03329400 | -0.98910200 | 2.20138800  |
| H | -1.81553500 | 4.05868200  | 4.05473000  | O  | -1.66768500 | 0.16785400  | 2.55891800  |
| C | -3.23204700 | 6.00225500  | -1.23600900 | O  | -1.34035600 | -1.63042000 | 1.34759600  |
| H | -4.11543600 | 6.48411600  | -0.80249800 | C  | 2.03316400  | 0.98901200  | 2.20147800  |
| H | -3.52963400 | 5.53823200  | -2.18099700 | O  | 1.66750400  | -0.16792100 | 2.55901100  |
| H | -2.50834500 | 6.79311500  | -1.46592800 | O  | 1.34027800  | 1.63035600  | 1.34765500  |
| C | -3.16473700 | 0.28716100  | -0.41065000 | C  | 3.30419400  | 1.57597600  | 2.70286500  |
| C | -4.24715300 | 0.91671400  | 0.20685900  | C  | 3.68521900  | 2.86005100  | 2.31229700  |
| H | -4.13202900 | 1.91681000  | 0.61297500  | C  | 4.15075600  | 0.80853600  | 3.50268200  |
| C | -5.47058100 | 0.26209000  | 0.34785100  | C  | 4.90947700  | 3.37568500  | 2.72300300  |
| C | -5.59749600 | -1.03558100 | -0.14653500 | H  | 3.01911200  | 3.43519500  | 1.67780700  |
| H | -6.54109300 | -1.56220900 | -0.01564100 | C  | 5.37498100  | 1.32534000  | 3.91236000  |
| C | -4.53294700 | -1.68897700 | -0.76532400 | H  | 3.84072400  | -0.19286400 | 3.78195100  |

|   |             |             |            |
|---|-------------|-------------|------------|
| C | 5.75647100  | 2.60739400  | 3.51973900 |
| H | 5.20583300  | 4.37571800  | 2.41933600 |
| H | 6.03341900  | 0.72821200  | 4.53690600 |
| H | 6.71377000  | 3.01020300  | 3.83881400 |
| C | -3.30432100 | -1.57611400 | 2.70271800 |
| C | -3.68534900 | -2.86012200 | 2.31192900 |
| C | -4.15087500 | -0.80881100 | 3.50267100 |
| C | -4.90960300 | -3.37583000 | 2.72255300 |
| H | -3.01924300 | -3.43514600 | 1.67733100 |
| C | -5.37509300 | -1.32569000 | 3.91227300 |
| H | -3.84085300 | 0.19254900  | 3.78209800 |
| C | -5.75658400 | -2.60767900 | 3.51943500 |
| H | -5.20596700 | -4.37580500 | 2.41870700 |
| H | -6.03352700 | -0.72867300 | 4.53693000 |
| H | -6.71388000 | -3.01054200 | 3.83845200 |

**TSIII**

|   |             |             |             |
|---|-------------|-------------|-------------|
| C | 2.94123300  | -1.05803200 | -1.51338300 |
| C | 3.32347300  | -2.31107100 | -1.03829500 |
| H | 2.88700300  | -2.70108500 | -0.12616400 |
| C | 4.25997400  | -3.08838200 | -1.72413000 |
| C | 4.80567900  | -2.59176800 | -2.90564500 |
| H | 5.52926300  | -3.19450600 | -3.45258400 |
| C | 4.43961600  | -1.34279400 | -3.40991100 |
| C | 3.50899400  | -0.58466900 | -2.70306900 |
| H | 3.21869000  | 0.38441800  | -3.09769000 |
| C | 4.68256400  | -4.42826200 | -1.17720600 |
| H | 3.84029300  | -4.94552500 | -0.70787300 |
| H | 5.45109700  | -4.30653800 | -0.40499400 |
| H | 5.09085600  | -5.07120500 | -1.96345400 |
| C | 5.01583000  | -0.83931200 | -4.71022100 |
| H | 6.09300200  | -1.02862900 | -4.77043100 |
| H | 4.85266800  | 0.23622500  | -4.82869200 |
| H | 4.54788200  | -1.34015400 | -5.56632900 |
| C | 1.23332300  | 1.15324500  | -1.85904900 |
| C | 1.71553500  | 2.45372000  | -1.97411100 |
| H | 2.39019200  | 2.85221000  | -1.22276100 |
| C | 1.34247800  | 3.26163000  | -3.05023700 |
| C | 0.48095400  | 2.73809500  | -4.01188900 |
| H | 0.19621800  | 3.35562500  | -4.86331000 |
| C | -0.03180900 | 1.44324300  | -3.90846400 |
| C | 0.35125600  | 0.65715600  | -2.82394600 |
| H | -0.03476900 | -0.35592300 | -2.72783400 |
| C | 1.87830000  | 4.66461000  | -3.18109100 |

|   |             |             |             |
|---|-------------|-------------|-------------|
| H | 2.64228100  | 4.72449100  | -3.96566600 |
| H | 2.33026600  | 5.00331300  | -2.24417400 |
| H | 1.08155800  | 5.36942400  | -3.44328300 |
| C | -0.99551000 | 0.91858400  | -4.94186500 |
| H | -1.10850300 | -0.16659000 | -4.86149600 |
| H | -0.65962500 | 1.15170000  | -5.95806500 |
| H | -1.98833600 | 1.36692800  | -4.81351800 |
| C | 2.87889400  | 0.97397100  | 0.51526600  |
| C | 4.14081400  | 1.39728800  | 0.08397300  |
| H | 4.50460700  | 1.10058800  | -0.89637600 |
| C | 4.94469900  | 2.19259100  | 0.89685400  |
| C | 4.46640900  | 2.56052400  | 2.15930700  |
| H | 5.08869000  | 3.18355100  | 2.80010300  |
| C | 3.22247000  | 2.13688400  | 2.62076600  |
| C | 2.43922800  | 1.33459800  | 1.78623600  |
| H | 1.49413200  | 0.94519500  | 2.15073700  |
| C | 6.31305600  | 2.63534900  | 0.44110200  |
| H | 6.45720100  | 2.44827400  | -0.62702200 |
| H | 7.10049600  | 2.09673400  | 0.98171900  |
| H | 6.46652800  | 3.70474800  | 0.62224900  |
| C | 2.69944400  | 2.53928700  | 3.97624100  |
| H | 1.94968500  | 3.33499500  | 3.88267500  |
| H | 3.49870200  | 2.90955400  | 4.62544300  |
| C | -2.13172800 | 1.11081500  | 2.26620000  |
| C | -1.96332000 | 0.13793100  | 3.24687900  |
| H | -1.42485500 | -0.77231300 | 3.01485000  |
| C | -2.44486700 | 0.33720100  | 4.54505000  |
| C | -3.10201800 | 1.52805300  | 4.83716100  |
| H | -3.47555000 | 1.69682000  | 5.84630300  |
| C | -3.29209200 | 2.51997200  | 3.86790000  |
| C | -2.80054400 | 2.30012400  | 2.58575800  |
| H | -2.93856700 | 3.06284900  | 1.82393200  |
| C | -2.25539700 | -0.73525500 | 5.58869400  |
| H | -1.28044100 | -1.22028400 | 5.47769700  |
| H | -3.02091900 | -1.51477800 | 5.49165600  |
| H | -2.32573700 | -0.32629500 | 6.60154100  |
| C | -4.02495700 | 3.79262300  | 4.21411100  |
| H | -5.08778600 | 3.59764300  | 4.40025100  |
| H | -3.95747900 | 4.52473300  | 3.40397800  |
| H | -3.61481300 | 4.25247000  | 5.12009600  |
| C | -3.14035300 | 0.39287400  | -0.31071500 |
| C | -4.30603100 | 0.10985500  | 0.40741900  |
| H | -4.31141800 | 0.20156600  | 1.48870100  |
| C | -5.46220100 | -0.32046200 | -0.23950300 |

|    |             |             |             |
|----|-------------|-------------|-------------|
| C  | -5.44524400 | -0.45113200 | -1.62819800 |
| H  | -6.33824700 | -0.80662200 | -2.13895900 |
| C  | -4.29989100 | -0.17873800 | -2.37066900 |
| C  | -3.14639200 | 0.23005400  | -1.69819400 |
| H  | -2.23195700 | 0.38796600  | -2.26282000 |
| C  | -6.69759500 | -0.68753400 | 0.54246000  |
| H  | -6.58157900 | -0.45669100 | 1.60545700  |
| H  | -6.90064500 | -1.76138900 | 0.45001400  |
| H  | -7.58038100 | -0.15451100 | 0.17214400  |
| C  | -4.29758000 | -0.34880400 | -3.86834500 |
| H  | -4.41123700 | 0.61535100  | -4.37940700 |
| H  | -5.11691000 | -0.99778200 | -4.19192300 |
| H  | -3.36000700 | -0.79564600 | -4.21230100 |
| C  | -1.13531600 | 2.48833600  | 0.01487700  |
| C  | -1.71756100 | 3.13571100  | -1.07173500 |
| H  | -2.48785900 | 2.64158100  | -1.65488800 |
| C  | -1.32956700 | 4.42983800  | -1.42562700 |
| C  | -0.34975100 | 5.07062300  | -0.67020100 |
| H  | -0.04047600 | 6.07788700  | -0.94390900 |
| C  | 0.25056300  | 4.44527300  | 0.42309800  |
| C  | -0.16158900 | 3.15903700  | 0.75872300  |
| H  | 0.28142800  | 2.67801600  | 1.62445000  |
| C  | 1.33742100  | 5.12083800  | 1.22072700  |
| H  | 1.03658700  | 5.25870600  | 2.26596600  |
| H  | 1.58219800  | 6.10535700  | 0.81017100  |
| H  | 2.25115500  | 4.51408500  | 1.22374000  |
| C  | -1.93765100 | 5.09305700  | -2.63413000 |
| H  | -1.50272600 | 4.67747700  | -3.55204500 |
| H  | -1.75848600 | 6.17284800  | -2.63562400 |
| H  | -3.01890200 | 4.92658900  | -2.68169200 |
| Ru | -0.02274300 | -1.09142800 | 0.43680300  |
| P  | 1.75587900  | -0.02028800 | -0.54587700 |
| P  | -1.55938000 | 0.77907800  | 0.55125800  |
| H  | 2.21315600  | 1.69418900  | 4.47428600  |
| C  | -1.95566300 | -2.46642100 | -0.48686100 |
| O  | -1.09735100 | -1.93512200 | -1.24974300 |
| O  | -1.82718000 | -2.34975600 | 0.77749700  |
| C  | 0.97403300  | -2.38551400 | 2.20364100  |
| O  | 0.07190700  | -3.35065400 | 2.52430900  |
| O  | 0.71855700  | -1.15200400 | 2.45397200  |
| H  | 0.93178400  | -2.48387800 | 0.58668500  |
| H  | -0.79976100 | -3.07440000 | 2.18050000  |
| C  | -3.14326500 | -3.15031000 | -1.05706200 |
| C  | -4.20014000 | -3.51342500 | -0.22260700 |

|   |             |             |             |
|---|-------------|-------------|-------------|
| C | -3.23367800 | -3.36223700 | -2.43308900 |
| C | -5.34749200 | -4.08173800 | -0.76493900 |
| H | -4.11600300 | -3.32555300 | 0.84231000  |
| C | -4.38101600 | -3.93016500 | -2.97362500 |
| H | -2.40429600 | -3.06377600 | -3.06591400 |
| C | -5.44079100 | -4.28553500 | -2.14022500 |
| H | -6.17139600 | -4.36322500 | -0.11535100 |
| H | -4.45327600 | -4.09245200 | -4.04504400 |
| H | -6.33910100 | -4.72579000 | -2.56376100 |
| C | 2.38509900  | -2.88657800 | 2.33755900  |
| C | 2.67661300  | -4.24582000 | 2.21528700  |
| C | 3.41057400  | -1.97148100 | 2.56437500  |
| C | 3.99268800  | -4.68336000 | 2.31614800  |
| H | 1.87048100  | -4.94917700 | 2.03755000  |
| C | 4.72746900  | -2.41066100 | 2.65208300  |
| H | 3.16885600  | -0.92023000 | 2.66232900  |
| C | 5.02089600  | -3.76618100 | 2.52890000  |
| H | 4.21768200  | -5.74146200 | 2.21922500  |
| H | 5.52276900  | -1.69023800 | 2.81825500  |
| H | 6.04894000  | -4.11026700 | 2.60063900  |

#### IV

|    |             |             |             |
|----|-------------|-------------|-------------|
| Ru | -0.19066200 | -0.26660400 | 0.20757600  |
| P  | 1.38040300  | -0.28063100 | -1.46606000 |
| P  | -1.39368300 | 1.45296300  | -0.67842700 |
| C  | -2.95297300 | 1.71938500  | 0.24869100  |
| C  | -2.95519400 | 2.53094300  | 1.38665400  |
| H  | -2.05600800 | 3.07200000  | 1.66776900  |
| C  | -4.10029000 | 2.64173100  | 2.16751200  |
| H  | -4.09054600 | 3.27645700  | 3.04880400  |
| C  | -5.25162300 | 1.93412400  | 1.82837900  |
| H  | -6.14168600 | 2.01345300  | 2.44564000  |
| C  | -5.25426200 | 1.11746400  | 0.70246600  |
| H  | -6.13836100 | 0.54267800  | 0.44344300  |
| C  | -4.11159900 | 1.01308800  | -0.08514500 |
| H  | -4.12220200 | 0.34499800  | -0.94116600 |
| C  | 3.09208000  | -0.04391800 | -0.84648600 |
| C  | 3.82194500  | -1.14115100 | -0.37893300 |
| H  | 3.39928600  | -2.13843300 | -0.44852100 |
| C  | 5.07253500  | -0.96208000 | 0.20404900  |
| H  | 5.61628400  | -1.82232600 | 0.58162200  |
| C  | 5.60897500  | 0.31481800  | 0.33013500  |
| H  | 6.57777700  | 0.45494100  | 0.79969000  |
| C  | 4.88988100  | 1.41393300  | -0.13269900 |

|   |             |             |             |
|---|-------------|-------------|-------------|
| H | 5.30119500  | 2.41445600  | -0.03374500 |
| C | 3.63796100  | 1.23680500  | -0.71313300 |
| H | 3.08405800  | 2.10862300  | -1.04983300 |
| C | -0.62837400 | 3.11538800  | -0.68339500 |
| C | 0.61796000  | 3.30020700  | -0.07873200 |
| H | 1.10391600  | 2.46491400  | 0.41887300  |
| C | 1.22376800  | 4.55588400  | -0.09727700 |
| H | 2.19161700  | 4.69072700  | 0.37714000  |
| C | 0.59043800  | 5.63065800  | -0.71318300 |
| H | 1.06575600  | 6.60707500  | -0.72934100 |
| C | -0.66134600 | 5.45595400  | -1.30244700 |
| H | -1.16318200 | 6.29555900  | -1.77423500 |
| C | -1.26906200 | 4.20595200  | -1.28329700 |
| H | -2.25015300 | 4.07799600  | -1.73392400 |
| C | 1.49348000  | -1.87263200 | -2.36991600 |
| C | 0.52891700  | -2.86103000 | -2.16238600 |
| H | -0.27220500 | -2.69409300 | -1.44860200 |
| C | 0.59115900  | -4.05772100 | -2.87597300 |
| H | -0.16197900 | -4.82151300 | -2.70619700 |
| C | 1.61064800  | -4.27451300 | -3.79624900 |
| H | 1.65711500  | -5.20885400 | -4.34836500 |
| C | 2.57880600  | -3.29244300 | -4.00528000 |
| H | 3.38002600  | -3.45906500 | -4.71938500 |
| C | 2.52001900  | -2.09939500 | -3.29603200 |
| H | 3.28908600  | -1.34636300 | -3.44925900 |
| C | 1.30372100  | 0.92644400  | -2.86814600 |
| H | 1.27459100  | 1.93677100  | -2.44546200 |
| H | 2.25091800  | 0.83895500  | -3.41146300 |
| C | 0.12036300  | 0.71798100  | -3.83215300 |
| H | -0.17802800 | -0.33796100 | -3.85567900 |
| H | 0.47764400  | 0.94590400  | -4.84272600 |
| C | -1.10859100 | 1.59654700  | -3.58037400 |
| H | -0.79351500 | 2.64313700  | -3.48340100 |
| H | -1.73262900 | 1.55184700  | -4.48182500 |
| C | -2.02125000 | 1.21531600  | -2.40884300 |
| H | -2.27988700 | 0.15121200  | -2.46541800 |
| H | -2.95553900 | 1.78183200  | -2.49846300 |
| C | 1.69150700  | -0.52450400 | 1.88740600  |
| O | 1.24310500  | 0.60963600  | 1.50935400  |
| O | 1.17837200  | -1.57741200 | 1.41825800  |
| C | -2.36349800 | -1.46492300 | 0.72739900  |
| O | -1.83609100 | -1.52139000 | -0.43832300 |
| O | -1.79783900 | -0.79018000 | 1.62697900  |
| C | -3.66405900 | -2.13897700 | 0.98080800  |

|   |             |             |             |
|---|-------------|-------------|-------------|
| C | -4.29054500 | -1.97853200 | 2.21752600  |
| C | -4.28563800 | -2.87337300 | -0.02970800 |
| C | -5.53529700 | -2.55500700 | 2.44175600  |
| H | -3.79599300 | -1.38832400 | 2.98139800  |
| C | -5.53132600 | -3.44901000 | 0.19701800  |
| H | -3.78612900 | -2.98067800 | -0.98698100 |
| C | -6.15658500 | -3.28899500 | 1.43231000  |
| H | -6.02496100 | -2.42902100 | 3.40286100  |
| H | -6.01631000 | -4.02059700 | -0.58893400 |
| H | -7.13015800 | -3.73780100 | 1.60838100  |
| C | 2.85279000  | -0.57758800 | 2.81266200  |
| C | 3.35041700  | -1.81203100 | 3.23158000  |
| C | 3.49190900  | 0.60117300  | 3.19620900  |
| C | 4.48632100  | -1.86555800 | 4.03094000  |
| H | 2.84313300  | -2.71672700 | 2.91309200  |
| C | 4.62880200  | 0.54549200  | 3.99456200  |
| H | 3.09765000  | 1.54898800  | 2.84648300  |
| C | 5.12781200  | -0.68717100 | 4.41045700  |
| H | 4.87517500  | -2.82550300 | 4.35813900  |
| H | 5.12998700  | 1.46298200  | 4.28902500  |
| H | 6.01798600  | -0.73030300 | 5.03200400  |

**TSIV**

|    |             |             |             |
|----|-------------|-------------|-------------|
| Ru | -0.20779300 | -0.56850100 | -0.05444600 |
| P  | 1.46562500  | 0.36504400  | -1.46750600 |
| P  | -1.70367800 | 1.11171400  | -0.34984000 |
| C  | -3.13216200 | 0.98027400  | 0.79994700  |
| C  | -2.81607900 | 0.87636300  | 2.16133800  |
| H  | -1.77303000 | 0.85841500  | 2.46828200  |
| C  | -3.82136200 | 0.77577900  | 3.11332900  |
| H  | -3.56207900 | 0.69739400  | 4.16506800  |
| C  | -5.15882500 | 0.76554200  | 2.71882900  |
| H  | -5.94591200 | 0.68039600  | 3.46247600  |
| C  | -5.47892600 | 0.85039300  | 1.36971400  |
| H  | -6.51664600 | 0.81739500  | 1.05122400  |
| C  | -4.47081300 | 0.96003700  | 0.41306000  |
| H  | -4.74847000 | 0.99442000  | -0.63474600 |
| C  | 2.92699200  | 1.07979300  | -0.62404800 |
| C  | 3.79495900  | 0.19930000  | 0.03364600  |
| H  | 3.63504700  | -0.87241500 | -0.04691900 |
| C  | 4.84739400  | 0.68022000  | 0.80239700  |
| H  | 5.49030900  | -0.01907500 | 1.32855900  |
| C  | 5.05918200  | 2.05291100  | 0.91253800  |
| H  | 5.87912000  | 2.43146800  | 1.51581600  |

|   |             |             |             |   |             |             |             |
|---|-------------|-------------|-------------|---|-------------|-------------|-------------|
| C | 4.21577200  | 2.93635000  | 0.24607600  | H | -0.15090400 | -3.32370900 | 0.22688500  |
| H | 4.37943600  | 4.00783400  | 0.32042500  | H | -1.38042900 | -1.27906000 | 0.90187000  |
| C | 3.15353000  | 2.45384600  | -0.51621800 | C | 2.58765700  | -1.36270400 | 2.74691500  |
| H | 2.49773400  | 3.16164900  | -1.01276000 | C | 2.87702400  | -0.36718500 | 3.68162500  |
| C | -1.11171100 | 2.80712300  | 0.03805400  | C | 3.32171400  | -2.54950300 | 2.73918200  |
| C | 0.08286500  | 2.97197200  | 0.74286900  | C | 3.89438200  | -0.56116800 | 4.60816000  |
| H | 0.65052100  | 2.10036600  | 1.05636700  | H | 2.30633800  | 0.55483000  | 3.66140300  |
| C | 0.54871500  | 4.25056500  | 1.04513500  | C | 4.34095900  | -2.74046200 | 3.66630000  |
| H | 1.48618700  | 4.36227600  | 1.58215700  | H | 3.08784300  | -3.30773100 | 1.99916200  |
| C | -0.17421500 | 5.37107500  | 0.64978500  | C | 4.62737600  | -1.74713900 | 4.60087900  |
| H | 0.19325700  | 6.36710300  | 0.87943600  | H | 4.12045800  | 0.21304600  | 5.33528700  |
| C | -1.37701700 | 5.21355200  | -0.03806900 | H | 4.91175500  | -3.66433800 | 3.66065900  |
| H | -1.95053500 | 6.08516700  | -0.33976000 | H | 5.42281300  | -1.89722400 | 5.32540100  |
| C | -1.84508500 | 3.93915600  | -0.33677900 | C | -3.17352300 | -2.35246600 | -0.16262400 |
| H | -2.79130700 | 3.82709200  | -0.85979300 | C | -3.74019300 | -2.56692300 | 1.09311700  |
| C | 2.24884000  | -0.83544600 | -2.61596200 | C | -3.99356200 | -2.14782600 | -1.26954600 |
| C | 1.63814200  | -2.06947000 | -2.85014500 | C | -5.12047000 | -2.57005700 | 1.23983300  |
| H | 0.71430800  | -2.31817900 | -2.33637100 | H | -3.08999800 | -2.70938600 | 1.95050300  |
| C | 2.20354100  | -2.96863100 | -3.75345100 | C | -5.37868500 | -2.15975100 | -1.12286000 |
| H | 1.72061700  | -3.92539000 | -3.92950600 | H | -3.53603500 | -1.99981600 | -2.24228600 |
| C | 3.37915100  | -2.64566100 | -4.42229100 | C | -5.94284300 | -2.36907300 | 0.13109800  |
| H | 3.81887500  | -3.34972700 | -5.12310500 | H | -5.55878300 | -2.71889800 | 2.22179100  |
| C | 3.99469200  | -1.41581700 | -4.19082400 | H | -6.01524000 | -2.00951700 | -1.99016000 |
| H | 4.91573000  | -1.16094600 | -4.70718500 | H | -7.02274400 | -2.37297000 | 0.24929600  |
| C | 3.43247700  | -0.51622300 | -3.29314900 |   |             |             |             |
| H | 3.92346600  | 0.43553100  | -3.10557600 |   |             |             |             |
| C | 0.91382700  | 1.67476400  | -2.64246500 |   |             |             |             |
| H | 0.64107900  | 2.56062600  | -2.05902500 |   |             |             |             |
| H | 1.76030400  | 1.95639600  | -3.27849400 |   |             |             |             |
| C | -0.28847000 | 1.20685400  | -3.49562800 |   |             |             |             |
| H | -0.41039000 | 0.11744100  | -3.44076700 |   |             |             |             |
| H | -0.06324000 | 1.42901900  | -4.54375600 |   |             |             |             |
| C | -1.62493800 | 1.88233300  | -3.15114400 |   |             |             |             |
| H | -1.45013000 | 2.94463400  | -2.93871300 |   |             |             |             |
| H | -2.25891100 | 1.85561800  | -4.04620000 |   |             |             |             |
| C | -2.46733400 | 1.26144200  | -2.02521000 |   |             |             |             |
| H | -2.73344400 | 0.23169800  | -2.28797500 |   |             |             |             |
| H | -3.39977700 | 1.83173100  | -1.95130800 |   |             |             |             |
| C | 1.53363100  | -1.13281300 | 1.72329600  |   |             |             |             |
| O | 0.90199900  | -0.03254900 | 1.71147900  |   |             |             |             |
| O | 1.29774000  | -2.00601500 | 0.83033800  |   |             |             |             |
| C | -1.68391700 | -2.37061100 | -0.36011100 |   |             |             |             |
| O | -1.11483900 | -3.46829000 | 0.20377200  |   |             |             |             |
| O | -1.19784500 | -1.87227200 | -1.44150000 |   |             |             |             |
